# Supplementary material for: Metabolomics and Transcriptomics Reveal the Response Mechanisms of Mikania micrantha to Puccinia spegazzinii Infection
Source: MDPI journal article supplement (doi:10.3390/microorganisms11030678), 2023-03-07
Supplement: s1 [file s1]

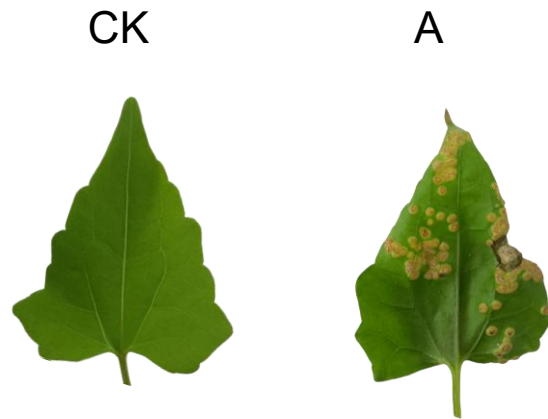

**Supplementary Figure S1** Phenotypes of *P. spegazzinii* were observed and photographed 17 days after inoculation.

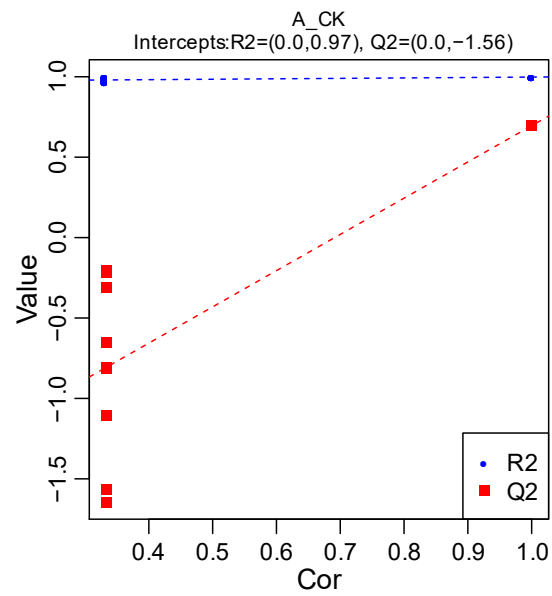

**Supplementary Figure S2** Performance of the permutation tests validated from the PLS-DA model.

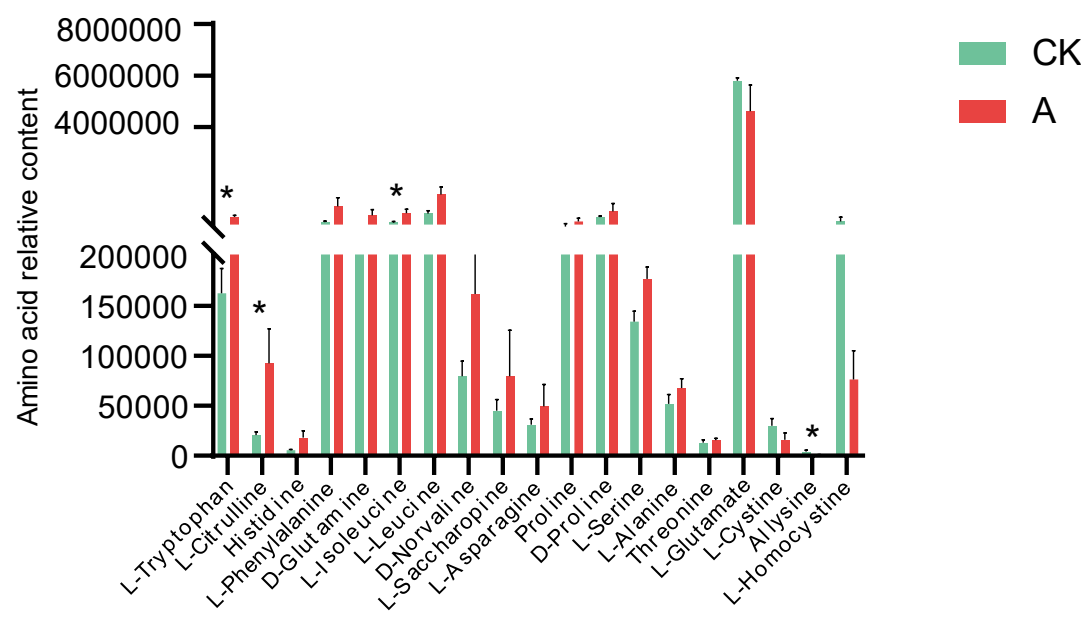

**Supplementary Figure S3** The difference of amino acid contents in *M. micrantha* leaves between the uninfected and infected by *P. spegazzinii*.
