# Supplementary material for: Metabolomics and Transcriptomics Reveal the Response Mechanisms of Mikania micrantha to Puccinia spegazzinii Infection
Source: Microorganisms. 2023 Mar 7;11(3):678. doi: 10.3390/microorganisms11030678 (PMC10057677; doi:10.3390/microorganisms11030678)
Supplement: Supplementary file 1 [file microorganisms-11-00678-s001.zip]

Archive with 6 entries (6 files):
- Supplementary Figures.pdf
- Supplementary Table 1.xlsx
- Supplementary Table 2.xlsx
- Supplementary Table 3.xlsx
- Supplementary Table 4.xlsx
- Supplementary Table 5.xlsx
