# Supplementary material for: Metabolomics and Transcriptomics Reveal the Response Mechanisms of Mikania micrantha to Puccinia spegazzinii Infection
Source: Microorganisms. 2023 Mar 7;11(3):678. doi: 10.3390/microorganisms11030678 (PMC10057677; doi:10.3390/microorganisms11030678)
Supplement: Supplementary file 1 [file microorganisms-11-00678-s001.zip › Supplementary Table 1.xlsx]

## Sheet: metabolism
Supplementary Table S1. List of all metabolites detected in Mikania micrantha leaves under control and treatment.
Compound_ID	Name	Class(English)	CK1	CK2	CK3	A1	A2	A3	FC	log2FC	Pvalue	VIP	sig
Com_31_neg	Isocitrate	Organic Acid And Its Derivatives	271700	277900	535400	12970	9594	17410	0.0368424	-4.76249	0.000433521	1.53586	down
Com_246_pos	Octadecadien-6-ynoic acid	Fatty acid	39650	33650	35630	9435	9393	7029	0.237373	-2.07477	0.00105115	1.5435	down
Com_127_neg	Notoginsenoside R2	Lipids and lipid-like molecules	11830	20750	23700	2191	2216	3998	0.149343	-2.7433	0.00289224	1.49026	down
Com_209_pos	beta-Nicotyrine	Alkaloids	3830	4267	2783	12890	9593	11170	3.09311	1.62906	0.00304106	1.50416	up
Com_198_pos	3-Methylcrotonylglycine	Organic Acid And Its Derivatives	15860	14890	12400	2854	4633	3398	0.25226	-1.98702	0.00313404	1.5205	down
Com_212_pos	Isotanshinone IIA	Quinones	74420	98010	91990	21010	18380	30130	0.262915	-1.92733	0.00341654	1.51151	down
Com_399_pos	Muscone	Organic oxygen compounds	117700	124800	124400	145600	145800	140300	1.17661	0.234642	0.00342317	1.50083	no_diff
Com_415_pos	Quinic acid	Fatty acid	264300	267500	434300	68200	54290	55870	0.184619	-2.43738	0.00372116	1.52381	down
Com_311_pos	Methyl linoleate	Lipids and lipid-like molecules	63080	86440	106200	24400	16390	28990	0.272877	-1.87368	0.0047088	1.47195	down
Com_245_pos	Nicotinuric Acid	Vitamins	41920	35000	79340	4912	8751	9472	0.148055	-2.7558	0.00475031	1.47504	down
Com_372_pos	Phloretin	Phenylpropanoids and polyketides	14310	8587	16410	4013	2834	2341	0.23375	-2.09696	0.00534261	1.47172	down
Com_49_neg	D-Sedoheptulose 7-phosphate	Carbohydrates	71670	85730	83510	18120	25090	28490	0.297622	-1.74845	0.00541916	1.516	down
Com_29_neg	Suberic acid	Organic Acid And Its Derivatives	36590	56850	74910	9878	11020	17350	0.227193	-2.13801	0.0061483	1.46346	down
Com_352_pos	L-Tryptophan	Amino Acid And Its Derivatives	182300	192600	113400	550100	409400	600900	3.19558	1.67608	0.00645935	1.47193	up
Com_392_pos	4-Nitrophenol	Phenols	178500	184800	190800	124000	130400	143000	0.717199	-0.479554	0.00666524	1.50278	no_diff
Com_45_neg	Malate	Tca Cycle	68430	113600	144300	31080	19300	21260	0.219532	-2.18749	0.00730173	1.46963	down
Com_203_pos	Nardosinone	Terpenoids	4310000	4003000	4095000	3546000	3484000	3707000	0.865329	-0.20868	0.00776548	1.4489	no_diff
Com_168_pos	trans-3-Indoleacrylic acid	Organic Acid And Its Derivatives	38900	38270	22470	124700	90380	116800	3.33079	1.73586	0.00866284	1.47747	up
Com_205_pos	Methyleugenol	Phenylpropanoids	8049	13240	11840	2274	4452	2526	0.279272	-1.84026	0.00924943	1.44975	down
Com_170_pos	Tricin	Flavonoids	83500	51880	91340	19530	26070	28350	0.326173	-1.61629	0.00944698	1.45832	down
Com_96_neg	Salicylic acid	Phytohormones	71300	84380	107400	9562	18670	21400	0.188657	-2.40616	0.00964425	1.4835	down
Com_163_pos	Albiflorin	Terpenoids	1002	1987	1626	7355	5541	6614	4.22752	2.07981	0.00990722	1.49452	up
Com_326_pos	Psoralen	Phenylpropanoids and polyketides	71440	46700	84960	16930	16250	20070	0.262186	-1.93134	0.0105452	1.49758	down
Com_33_neg	GA7-1	Phytohormones	124800	172700	335200	36680	47140	23460	0.169559	-2.56014	0.0108477	1.44152	down
Com_148_neg	Pyridoxal 5'-Phosphate	Vitamins	8407	6006	7997	2804	4015	2391	0.410977	-1.28287	0.0112513	1.44287	down
Com_432_pos	Dodecanedioic Aicd	Organic Acid And Its Derivatives	92680	99400	64320	12790	21050	28860	0.24454	-2.03186	0.0113495	1.45801	down
Com_303_pos	Chrysoeriol	Flavonoids	2961000	2461000	3302000	377200	265900	669700	0.150481	-2.73234	0.0121475	1.49755	down
Com_3_neg	1,6-Anhydro-β-D-Glucopyranose	Carbohydrates	37020	26670	28910	11200	16370	16730	0.478402	-1.06371	0.0122782	1.42657	down
Com_247_pos	Xanthotoxol	Phenylpropanoids and polyketides	11960	8009	5321	2098	1217	654	0.15694	-2.67172	0.0126659	1.44253	down
Com_306_pos	Ethyl ferulate	Phenolic acids	130400	128000	124900	139300	136700	136000	1.07488	0.10417	0.0129259	1.44812	no_diff
Com_271_pos	Isofraxidin	Phenylpropanoids	47470	40150	39350	1952	5630	4314	0.0936914	-3.41594	0.0139667	1.50701	down
Com_106_neg	Shikimic acid	Organic Acid And Its Derivatives	196000	197900	225700	44380	69760	76510	0.307699	-1.70041	0.0140635	1.49694	down
Com_57_neg	2–furanoic acid	Organic Acid And Its Derivatives	133200	307800	357800	30630	49410	53760	0.167501	-2.57776	0.014277	1.44283	down
Com_426_pos	6,7-Dimethoxy-4-Methylcoumarin	Phenylpropanoids	31040	44980	28500	20010	12920	13960	0.448622	-1.15643	0.0147044	1.40967	down
Com_1_neg	Mevalonic acid	Organic Acid And Its Derivatives	106900	82150	130100	14010	33410	27250	0.233965	-2.09563	0.0150498	1.45077	down
Com_224_pos	Germacrone;(3E,7E)-3,7-dimethyl-10-propan-2-ylidenecyclodeca-3,7-dien-1-one	Ketones	87343	125200	191700	31736	44298	17280	0.230836	-2.11506	0.0152258	1.40617	down
Com_441_pos	gamma-Dodecalactone	Others	28170	16430	13690	4013	4576	8218	0.288334	-1.79419	0.0157186	1.39599	down
Com_13_neg	D-Glucose	Carbohydrates	27490	25510	42250	14360	6783	10360	0.33074	-1.59623	0.0165909	1.4071	down
Com_278_pos	5'-Deoxy-5'-(Methylthio)Adenosine	Nucleotide And Its Derivates	269100	158800	286400	74290	80420	64340	0.306664	-1.70527	0.0167485	1.47394	down
Com_386_pos	p-Coumaroylagmatine	Phenolamides	65900	32280	39720	3705	12950	6824	0.170261	-2.55418	0.0183937	1.42004	down
Com_261_pos	Urea	Others	24340	44400	33470	135700	83390	222300	4.31846	2.11052	0.0193512	1.41509	up
Com_308_pos	Choline	Cholines	188400	205200	221000	125600	115100	154500	0.64302	-0.637065	0.0196298	1.42733	no_diff
Com_270_pos	LPC(1-acyl 18:1)	Fatty acid	97130	64570	83020	51690	36240	46790	0.550507	-0.861168	0.0207521	1.37367	no_diff
Com_19_neg	Methylophiopogonanone A	Flavonoids	406	803	399	3207	2811	1200	4.48881	2.16633	0.0214398	1.38485	up
Com_134_neg	3,7-Di-O-methylquercetin	Flavonol	14510	25640	51530	3094	4940	3512	0.125938	-2.98921	0.0220985	1.4468	down
Com_51_neg	D-Xylulose	Carbohydrates	126800	85840	115200	71500	46900	59220	0.541789	-0.884198	0.0222327	1.36504	no_diff
Com_47_neg	D-Tagatose	Carbohydrates	39820	41830	51010	14340	23520	23110	0.459596	-1.12156	0.023782	1.42262	down
Com_189_pos	Sclareol Glycol	Alcohols and polyols	31030	45270	33250	13840	12050	22080	0.437882	-1.19139	0.0239447	1.38705	down
Com_223_pos	Pratensein-7-O-glucoside	Flavonoids	5620	18050	6851	54090	26990	79880	5.27375	2.39883	0.0243184	1.35933	up
Com_330_pos	5-Methyltryptamine	Amino Acid And Its Derivatives	56680	33620	70520	10000	18700	22230	0.316689	-1.65886	0.024421	1.36048	down
Com_280_pos	9-Hydroxy-(10E,12Z,15Z)-octadecatrienoic acid	Fatty acid	39340	42870	54200	3739	12170	7665	0.172817	-2.53268	0.0255628	1.45472	down
Com_118_neg	4-Hydroxy-2-Oxoglutaric Acid	Organic Acid And Its Derivatives	1576000	1407000	1874000	1240000	945600	1080000	0.672349	-0.572717	0.0258644	1.34975	no_diff
Com_260_pos	D-Glucono-1,5-lactone	Amino Acid And Its Derivatives	43700	42970	44590	39960	37130	39870	0.891056	-0.166412	0.026026	1.41817	no_diff
Com_400_pos	methylQuercetin O-hexoside	Flavonoids	65910	209500	340700	10060	6602	39160	0.090604	-3.46428	0.0265072	1.35136	down
Com_153_neg	Allysine	Amino Acid And Its Derivatives	3588	2389	6774	800	794	1592	0.249863	-2.00079	0.0268229	1.3629	down
Com_78_neg	Lonicerin	Flavonoids	160900	118400	204813	34330	12220	41150	0.181156	-2.4647	0.0272626	1.41934	down
Com_376_pos	D-2-Aminobutyric acid	Organic Acid And Its Derivatives	680500	615800	639200	402100	337100	466600	0.622991	-0.682716	0.02742	1.44251	no_diff
Com_263_pos	O-Phosphocholine	Others	1789000	1291000	2086000	113800	88850	396500	0.115979	-3.10806	0.0277797	1.44358	down
Com_16_neg	D-2-Hydroxypentanedioic acid	Amino Acid And Its Derivatives	15040	18590	30860	5962	4372	10690	0.326004	-1.61704	0.0294025	1.34681	down
Com_40_neg	IsochlorogenicacidC	Phenols	416400	304800	367900	211800	185600	272500	0.615095	-0.701119	0.0294114	1.34411	no_diff
Com_98_neg	Rutin	Flavonoids	47920	11630	19341	2973	278	1455	0.0596519	-4.06729	0.0295354	1.3737	down
Com_183_pos	Kaempferol7-O-β-D-glucopyranoside	Flavonoids	122300	25440	80170	7052	4870	8636	0.0902023	-3.47069	0.0297307	1.42436	down
Com_339_pos	Arachidonic acid	Fatty acid	452	1209	963	9756	3233	2690	5.97523	2.57899	0.0313718	1.34214	up
Com_136_neg	Crocetin	Isoprenoids	4731	7863	9690	2724	3918	1976	0.386735	-1.37058	0.0314256	1.3291	down
Com_166_pos	trans-3-Hydroxy-L-proline	Amino Acid And Its Derivatives	47430	62100	48250	113300	81620	150800	2.19115	1.13169	0.0325599	1.38649	up
Com_450_pos	Resveratrol	Polyphenol	6004	4703	3198	1976	2660	1400	0.434088	-1.20394	0.0327609	1.33712	down
Com_185_pos	(+)-pinoresinol 4'-O-β-D-glucopyranoside	TCM	20730	14580	15990	7903	2966	4103	0.291852	-1.77669	0.0333243	1.4135	down
Com_244_pos	Nobiletin	Flavonoids	3679	2823	1940	4440	6272	7367	2.14155	1.09866	0.0335955	1.32733	up
Com_305_pos	Furanodiene	Others	27020	30720	31460	2587	6276	8087	0.190022	-2.39576	0.0342151	1.44969	down
Com_80_neg	Tiliroside	Flavonoids	116600	82320	84061	24870	11120	33990	0.247296	-2.01569	0.0357802	1.40838	down
Com_451_pos	Nicotianamine	Others	616000	598900	1039000	81430	123200	303000	0.225223	-2.15057	0.0363236	1.38186	down
Com_388_pos	Ferruginol	Terpenoids	16500	7820	14980	2765	5149	6163	0.358193	-1.48119	0.0379465	1.30696	down
Com_10_neg	Pinoresinol-glucoside	Phenylpropanoids	60780	57720	101800	10210	20340	32190	0.284793	-1.81201	0.0379978	1.3577	down
Com_446_pos	Erucamide	Fatty acid	4996000	5137000	5112000	4165000	4476000	4630000	0.870515	-0.200059	0.0385705	1.4147	no_diff
Com_167_pos	trans-9-Octadecenoic acid	Fatty acid	141700	160200	156200	127000	128100	131000	0.842829	-0.246688	0.0387103	1.41884	no_diff
Com_406_pos	L-Citrulline	Amino Acid And Its Derivatives	14470	25120	22890	68960	48840	160300	4.45102	2.15414	0.040602	1.36716	up
Com_291_pos	Methional	Organic oxygen compounds	156000	140300	174700	114600	86930	120300	0.683291	-0.549428	0.0407452	1.32792	no_diff
Com_92_neg	Citraconic Acid	Organic Acid And Its Derivatives	21930	33460	70390	9510	6984	15800	0.25675	-1.96156	0.041239	1.31774	down
Com_67_neg	D-Glucuronic acid	Sugar Acids And Its Derivatives	9478	14220	11070	2371	4351	5932	0.363955	-1.45817	0.0419572	1.36478	down
Com_34_neg	Fumaric Acid	Tca Cycle	24830	31500	25390	15580	21440	19740	0.694567	-0.525815	0.0422192	1.29833	no_diff
Com_94_neg	Pectolinarigenin	Flavonoids	198800	240200	316700	95940	100900	175300	0.492444	-1.02197	0.0422871	1.31609	down
Com_377_pos	N', N''-p-Coumaroyl, p-cinnamoylcadaverine	Polyamine	9287	24890	25820	3270	4065	8886	0.270364	-1.88703	0.0449492	1.2858	down
Com_151_neg	Astragalin	Flavonoids	1016000	172200	669300	59360	40690	52790	0.0822826	-3.60327	0.0461461	1.40412	down
Com_420_pos	N-Acetyl-D-tryptophan	Amino Acid And Its Derivatives	268200	126900	493300	52810	66070	43360	0.18262	-2.45308	0.0469324	1.38068	down
Com_21_neg	Nicotinamide-N-oxide	Vitamins	87520	108500	138200	24957	19300	4744	0.146613	-2.76991	0.047079	1.39956	down
Com_228_pos	Ligustilide	Organoheterocyclic compounds	39010	31630	15350	9471	12820	7259	0.343645	-1.54101	0.0474748	1.32853	down
Com_182_pos	L-Isoleucine	Amino Acid And Its Derivatives	346900	330300	218100	582600	460700	957400	2.23467	1.16006	0.0478857	1.29559	up
Com_283_pos	5,6-Dihydro-5-methyluracil	Nucleotide And Its Derivates	15830	11240	23560	41600	37590	26940	2.09619	1.06777	0.0479248	1.30719	up
Com_215_pos	(+)-epipinoresinol-4-O-β-D-glucoside	TCM	7069	5041	10280	1145	684	3200	0.224609	-2.15451	0.0495094	1.34129	down
Com_112_neg	D-sedoheptulose-1-7-phosphate	Carbohydrates	53290	41070	42230	13860	27830	12040	0.393367	-1.34605	0.0504066	1.37253	no_diff
Com_177_pos	N', N''-Di-p-hydroxybenxoylcadaverine	Polyamine	21130	36900	44160	6045	4080	16570	0.261229	-1.93661	0.0511168	1.31691	no_diff
Com_427_pos	Benzamidine	Ployphenol	8557	4239	8751	15690	12860	31350	2.77997	1.47507	0.0511733	1.28129	no_diff
Com_61_neg	D-Glucose 1-phosphate	Carbohydrates	58180	48600	66550	43430	35680	45430	0.718514	-0.476912	0.0515693	1.27074	no_diff
Com_99_neg	2,5-Dihydroxybenzoic acid	Benzoic Acid And Its Derivatives	12710	9510	11910	2772	6735	4333	0.405508	-1.3022	0.0521565	1.35695	no_diff
Com_95_neg	4-Hydroxybenzoic acid	Phenolic acids	19780	22970	27290	10370	2773	4743	0.255368	-1.96935	0.0521883	1.38165	no_diff
Com_123_neg	Pyruvic Acid	Tca Cycle	169300	151200	1005000	20290	28470	34810	0.0630479	-3.98741	0.0525161	1.37934	no_diff
Com_383_pos	Tricin 5-O-hexoside	Flavonoids	64310	203400	99100	14190	22970	54872	0.250898	-1.99483	0.0528393	1.26144	no_diff
Com_350_pos	L-Serine	Amino Acid And Its Derivatives	118100	153400	131800	192900	154100	184700	1.31837	0.398759	0.0539998	1.2544	no_diff
Com_181_pos	L-Leucine	Amino Acid And Its Derivatives	757500	761700	419900	1217000	990900	1960000	2.1494	1.10393	0.0548612	1.25075	no_diff
Com_307_pos	Chlorogenic Acid	Polyphenol	292800	83560	136200	22570	17220	76380	0.226647	-2.14148	0.0577701	1.2524	no_diff
Com_340_pos	Arabidopyl ketoadipic acid	Others	7727	6455	5575	5349	3319	3700	0.626006	-0.675752	0.0585433	1.27721	no_diff
Com_317_pos	Diosmetin	Flavonoids	53220	28970	43770	9036	1989	11310	0.177318	-2.49559	0.059362	1.34009	no_diff
Com_4_neg	Citric acid	Organic Acid And Its Derivatives	35260000	64200000	67800000	20310000	33900000	27560000	0.48888	-1.03245	0.0596958	1.25481	no_diff
Com_89_neg	9,10-EODE	Fatty acid	424600	421900	500800	259900	377000	257800	0.664069	-0.590595	0.0602853	1.30685	no_diff
Com_385_pos	Gramine	Alkaloids	27980	35530	39960	20300	11760	22570	0.527979	-0.921447	0.0610559	1.28781	no_diff
Com_132_neg	Syringic acid O-glucoside	Benzoic Acid And Its Derivatives	2410	3512	2009	4418	3615	5222	1.67129	0.740962	0.0635611	1.25328	no_diff
Com_59_neg	Oxaloacetate	Organic Acid And Its Derivatives	65720	95370	92740	68400	48970	43800	0.634953	-0.655279	0.0637481	1.23253	no_diff
Com_214_pos	Spermidine	Polyamine	183300	92680	197800	374300	354900	268000	2.10477	1.07367	0.0654853	1.29836	no_diff
Com_70_neg	D-Malic acid	Tca Cycle	2008000	3533000	3800000	2095000	1470000	1230000	0.513328	-0.962046	0.0661664	1.23106	no_diff
Com_336_pos	(-)-Maackiain	Phenols	4966	8608	5101	12500	9406	10320	1.72562	0.787117	0.0672167	1.28333	no_diff
Com_6_neg	Lactobionic acid	Carbohydrates	7552	7918	4802	21140	9489	25600	2.77373	1.47183	0.0672333	1.26886	no_diff
Com_390_pos	Cordycepin	Alkaloids	13630	23470	19490	12290	9139	12320	0.596377	-0.745702	0.0672664	1.24762	no_diff
Com_77_neg	1-O-beta-D-Glucopyranosyl sinapate	Hydroxycinnamoyl derivatives	26010	29010	22060	54190	36380	33780	1.61326	0.689978	0.0675557	1.2701	no_diff
Com_313_pos	Levistilide A	Terpenoids	4316	5671	4425	2849	3946	3636	0.723772	-0.466393	0.0691176	1.21334	no_diff
Com_117_neg	4-p-Coumaroylquinic acid	Polyphenol	17820000	2706000	17180000	1498000	2616000	629000	0.125789	-2.99092	0.0694695	1.23462	no_diff
Com_105_neg	JA-Ile	Phytohormones	4049	5827	4474	30380	9886	51520	6.39624	2.67722	0.0696979	1.34111	no_diff
Com_207_pos	Polypodine B	Terpene	24980	32510	16690	13500	11150	13550	0.514964	-0.957458	0.0705764	1.31697	no_diff
Com_309_pos	Cholesterol	Lipids and lipid-like molecules	854700	861600	834000	720100	777600	801400	0.901502	-0.149598	0.070633	1.31483	no_diff
Com_139_neg	3-Hydroxybutyrate	Organic Acid And Its Derivatives	14840	13390	11410	2344	6757	5491	0.368113	-1.44178	0.0714451	1.32892	no_diff
Com_121_neg	Afzelechin	Flavanone	60350	79750	56360	35980	19280	42170	0.495928	-1.0118	0.0723578	1.27421	no_diff
Com_453_pos	delta-Aminolevulinic acid hydrochloride	Carbohydrates	3131	1255	3113	7792	3860	14390	3.47273	1.79607	0.0740741	1.22164	no_diff
Com_290_pos	Tryptamine	Alkaloids	3316	3818	2815	2200	2472	2839	0.75495	-0.405547	0.0740956	1.20368	no_diff
Com_91_neg	Chlorogenic acid	Polyphenol	1222000	126900	135500	22220	17020	66720	0.0713824	-3.80829	0.0747706	1.23972	no_diff
Com_108_neg	Apigenin	Flavonoids	29430	56560	52330	1658	10580	12000	0.175231	-2.51267	0.0765646	1.29695	no_diff
Com_149_neg	Sucralose	Organic oxygen compounds	4433	4161	3568	9126	9043	26220	3.64981	1.86782	0.0765859	1.33599	no_diff
Com_258_pos	trans-2-Hexenal	Others	3558000	3565000	3773000	3126000	3417000	3424000	0.914739	-0.128567	0.076631	1.22737	no_diff
Com_397_pos	N-(3-Indolylacetyl)-L-Alanine	Indole And Its Derivatives	37510	14230	66310	9718	6949	6908	0.199704	-2.32407	0.0768954	1.31202	no_diff
Com_62_neg	Cyclic AMP	Nucleotide And Its Derivates	16480	9513	48680	7198	3113	5085	0.206179	-2.27803	0.0809287	1.23879	no_diff
Com_35_neg	Benzoic acid	Benzoic Acid And Its Derivatives	104500	74120	79740	58650	74000	55180	0.727009	-0.459955	0.0848301	1.18085	no_diff
Com_396_pos	L-Phenylalanine	Amino Acid And Its Derivatives	357700	243600	347000	725000	495000	1574000	2.94633	1.55892	0.0895546	1.26752	no_diff
Com_384_pos	Reduced glutathione	Amino Acid And Its Derivatives	12590	15160	13980	8153	9948	12250	0.727318	-0.459341	0.0900109	1.22987	no_diff
Com_438_pos	Selgin O-malonylhexoside	Flavonoids	5773	13290	11020	6531	1570	2491	0.352093	-1.50597	0.0901888	1.19647	no_diff
Com_342_pos	Tricin O-malonylhexoside	Flavonoids	76080	141500	52940	7410	6051	48370	0.228564	-2.12933	0.0904588	1.23179	no_diff
Com_32_neg	Isochlorogenic acid A	Alcohols and polyols	3110000	273200	367000	69520	33050	211700	0.0838009	-3.57689	0.0905771	1.17565	no_diff
Com_2_neg	1,4-Dicaffeoylquinic Acid	Organic Acid And Its Derivatives	1983000	160900	203500	33820	17390	126200	0.0755772	-3.7259	0.0910895	1.17159	no_diff
Com_234_pos	Esculetin	Phenylpropanoids	76170	24890	26660	6566	3717	22990	0.260515	-1.94056	0.091144	1.18031	no_diff
Com_333_pos	2'-O-methyladenosine	Nucleic acid derivative	17420	10480	5134	4645	3899	2683	0.339862	-1.55698	0.0912338	1.24369	no_diff
Com_434_pos	Erucic acid	Lipids and lipid-like molecules	226200	226500	214900	197500	187900	214600	0.898742	-0.154021	0.0914064	1.2253	no_diff
Com_24_neg	D-Xylonic acid	Organic Acid And Its Derivatives	9892	11080	17470	1551	5425	5921	0.335492	-1.57565	0.0914067	1.24262	no_diff
Com_66_neg	D-Glutamic acid	Amino Acid And Its Derivatives	3569	4236	5951	3450	3087	2373	0.647717	-0.626564	0.0918736	1.16878	no_diff
Com_370_pos	Phosphoric Acid	Organic Acid And Its Derivatives	18180000	23310000	20390000	2943000	6428000	12000000	0.345362	-1.53382	0.092117	1.29156	no_diff
Com_430_pos	p-Nitroaniline	Others	13390	4976	5016	2304	3348	2654	0.355231	-1.49317	0.0932872	1.25335	no_diff
Com_114_neg	5-O-p-Coumaroylquinic acid	Quinate and its derivatives	1762000	219400	1624000	154600	249600	61060	0.129045	-2.95405	0.0936808	1.18438	no_diff
Com_402_pos	vasicine	Alkaloids	4739	4839	973	15990	9432	13490	3.68799	1.88284	0.0953552	1.25874	no_diff
Com_195_pos	N2-Methylguanosine	Nucleic acid derivative	121600	89200	113000	71340	35850	71790	0.552749	-0.855305	0.0956741	1.22559	no_diff
Com_122_neg	4-O-Caffeoylquinic acid	Alcohols and polyols	8132000	2449000	3105000	1145000	853000	2581000	0.334575	-1.5796	0.0978048	1.14404	no_diff
Com_329_pos	N-Sinapoylagmatine	Phenolamides	4201	6760	3679	2981	2430	3306	0.595423	-0.748012	0.0997067	1.19905	no_diff
Com_162_pos	Alantolactone	TCM	455400	117300	238600	126900	86000	34070	0.304413	-1.7159	0.100047	1.14607	no_diff
Com_349_pos	(-)-Pinoresinol	Lignans, neolignans and related compounds	3446	1701	5317	1129	1074	1843	0.386659	-1.37087	0.1004	1.19704	no_diff
Com_344_pos	Thiamin	Vitamins	68520	8971	18040	10650	1995	3618	0.170238	-2.55438	0.100929	1.14341	no_diff
Com_433_pos	Roseoside	Others	10280	13060	7814	18480	12200	15900	1.49515	0.580293	0.10218	1.14129	no_diff
Com_371_pos	4-O-p-Coumaroylquinic acid	Ployphenol	35700	6248	22770	5763	6566	2219	0.224791	-2.15335	0.10454	1.15332	no_diff
Com_236_pos	Hordenine	Benzene and substituted derivatives	49740	35680	41580	89970	65090	207300	2.85323	1.5126	0.104673	1.25028	no_diff
Com_38_neg	Biopterin	Organoheterocyclic compounds	42330	37220	34960	167900	77900	57900	2.65217	1.40717	0.106184	1.25893	no_diff
Com_256_pos	Toringin	Flavonoids	4286	2282	2996	4397	4682	8938	1.88384	0.913673	0.106326	1.14554	no_diff
Com_155_neg	Tricin O-saccharic acid	Flavone	1220000	1907000	2040000	623200	712500	1439000	0.537004	-0.896995	0.107263	1.16092	no_diff
Com_39_neg	PinoresinolDiglucoside	Lignans, neolignans and related compounds	18230	36980	31920	5230	8670	21030	0.400895	-1.3187	0.108023	1.17378	no_diff
Com_440_pos	Fraxinellone	Terpenoids	437500	111500	224200	124500	88940	42330	0.330794	-1.59599	0.110343	1.12872	no_diff
Com_321_pos	Xanthurenic acid O-hexoside	Amino Acid And Its Derivatives	6915	5969	7329	1331	5077	1874	0.409736	-1.28723	0.115804	1.23631	no_diff
Com_74_neg	sesamolin	Others	74400	28950	92870	29430	19180	24100	0.370553	-1.43225	0.116995	1.1924	no_diff
Com_287_pos	(S)-Zearalanone	Ketones	58530	54170	36390	3118	29870	8210	0.27633	-1.85554	0.118818	1.21642	no_diff
Com_341_pos	Asarinin	Phenylpropanoids	55010	15150	22470	5518	2593	18640	0.288794	-1.79189	0.119585	1.11996	no_diff
Com_428_pos	Atractylenolide I	Terpenoids	29425	45900	29110	1901	1549	21510	0.239	-2.06492	0.122409	1.2208	no_diff
Com_20_neg	Uridine 5'-monophosphate	Nucleotide And Its Derivates	4394	16980	20930	2360	4398	4367	0.262977	-1.92699	0.123047	1.16104	no_diff
Com_327_pos	N-p-Coumaroylagmatine	Phenolamides	8036	9281	11890	15550	12340	11135	1.33615	0.418084	0.125955	1.08559	no_diff
Com_93_neg	Hydroxycitric acid	Organic Acid And Its Derivatives	3577	4752	7123	3031	3300	2777	0.589438	-0.762587	0.126151	1.19485	no_diff
Com_17_neg	2-Methylglutaric Acid	Organic Acid And Its Derivatives	324800	312000	256700	278200	169700	198100	0.722999	-0.467934	0.129688	1.14058	no_diff
Com_126_neg	Ophiopogonanone C	TCM	127200	29730	39870	9890	6547	40900	0.291347	-1.77919	0.134248	1.07547	no_diff
Com_216_pos	S-Sulfo-L-cysteine	Amino Acid And Its Derivatives	6106	9912	3603	2567	4314	2636	0.485042	-1.04382	0.13542	1.11662	no_diff
Com_158_pos	1-Methylhistidine	Amino Acid And Its Derivatives	13240	4934	12330	21270	17860	20720	1.96204	0.972353	0.135579	1.19564	no_diff
Com_143_neg	Esculin hydrate	Phenylpropanoids	15050	18450	16530	20490	32660	57520	2.21207	1.1454	0.13597	1.19987	no_diff
Com_324_pos	Pterosin Z	TCM	21110	5507	12090	4829	6933	1656	0.346656	-1.52842	0.137552	1.06931	no_diff
Com_417_pos	Quercetin	Flavonoids	5744	9961	19730	8451	2359	2935	0.387893	-1.36627	0.137767	1.0601	no_diff
Com_381_pos	N-Caffeoyl agmatine	Phenolamides	19180	4137	40480	2369	4605	2815	0.15344	-2.70426	0.138174	1.15978	no_diff
Com_249_pos	Nicotinic Acid	Vitamins	24010	14130	84910	14210	9680	6059	0.243389	-2.03866	0.143166	1.10652	no_diff
Com_222_pos	Spermidine derivative	Phenolamides	4981	4875	6043	6154	5637	6892	1.17511	0.23279	0.145723	1.08243	no_diff
Com_316_pos	Diosgenin	Terpene	4217000	5124000	4580000	3677000	2641000	4164000	0.752963	-0.409349	0.146828	1.11024	no_diff
Com_165_pos	Griffonilide	Lactones	9214	5283	3821	4472	2772	2735	0.544765	-0.876295	0.148332	1.08475	no_diff
Com_315_pos	D-Norvaline	Amino Acid And Its Derivatives	69010	60790	109400	142300	90230	253100	2.03023	1.02164	0.149654	1.09751	no_diff
Com_319_pos	DL-threo-beta-Methylaspartic acid	Amino Acid And Its Derivatives	13800	14560	19230	5734	8399	14440	0.600399	-0.736006	0.155336	1.11748	no_diff
Com_229_pos	Histidine	Amino Acid And Its Derivatives	5438	6982	4402	18600	6178	30020	3.25752	1.70377	0.155882	1.12591	no_diff
Com_196_pos	5-O-Caffeoylshikimic acid	Ployphenol	29620	8054	9350	1989	4970	9341	0.346632	-1.52853	0.156856	1.02633	no_diff
Com_11_neg	Inositol	Carbohydrates	902600	508100	1185000	396800	324100	708300	0.550603	-0.860916	0.15727	1.04266	no_diff
Com_391_pos	3-O-Caffeoylquinic acid methyl ester	TCM	37740	5579	22460	8734	3340	4367	0.249943	-2.00033	0.157327	1.06936	no_diff
Com_443_pos	Maltotriitol	Sugar Alcohols	6951	7419	2704	24700	20960	5653	3.00533	1.58752	0.157674	1.06306	no_diff
Com_104_neg	Kaempferide	Flavonoids	5593	6685	10130	3961	3346	6773	0.628347	-0.670367	0.159534	1.04461	no_diff
Com_171_pos	Pterostilbene	Phenylpropanoids	18920	9175	25250	48030	30090	21800	1.87309	0.90542	0.162407	1.02262	no_diff
Com_133_neg	Glucarate O-Phosphoric acid	Carbohydrates	18140	9893	10670	1596	10840	795	0.34186	-1.54852	0.163626	1.12406	no_diff
Com_131_neg	Sinigrin	Others	15720	38550	20070	12600	18110	9845	0.545534	-0.874259	0.16518	1.04146	no_diff
Com_393_pos	L-Dihydroorotic acid	Nucleotide And Its Derivates	2202000	3343000	1882000	666630	237600	1957000	0.385247	-1.37614	0.165478	1.10445	no_diff
Com_348_pos	Triptonide	Terpenoids	2833	5581	5249	315	1706	2704	0.345824	-1.53189	0.166069	1.09815	no_diff
Com_154_neg	Tricin O-malonyl rhamnoside	Flavone	9491	20840	19670	6965	6814	14060	0.556769	-0.84485	0.166178	1.01689	no_diff
Com_279_pos	5-Methylcytidine	Nucleic acid derivative	7509	5930	7728	2612	6252	1422	0.485945	-1.04113	0.167476	1.12459	no_diff
Com_160_pos	Angelicin	Phenylpropanoids and polyketides	77280	21100	39050	18160	24970	3808	0.341541	-1.54987	0.16909	1.03871	no_diff
Com_452_pos	Rhodomyrtone	Others	8908000	9984000	9164000	7989000	6764000	9048000	0.848339	-0.237287	0.170163	1.06665	no_diff
Com_192_pos	Bruceine D	Terpenoids	2913	31680	76210	2332	2619	2470	0.0669747	-3.90024	0.170392	1.12988	no_diff
Com_325_pos	Pyridoxamine dihydrochloride	Vitamins	2152	2783	300	2107	6344	10110	3.54556	1.82601	0.173781	1.01221	no_diff
Com_83_neg	Orcinol glucosid	Phenols	39200	46270	47440	39670	38420	39080	0.881574	-0.181846	0.174433	1.10908	no_diff
Com_69_neg	3-O-Feruloylquinic acid	Quinate and its derivatives	2551000	771000	3118000	806900	687800	754500	0.349255	-1.51765	0.175372	1.11577	no_diff
Com_241_pos	3’,4’,5’-Tricetin O-malonylhexoside	Flavonoids	9423	38860	25390	5013	6518	17520	0.394324	-1.34255	0.177168	0.994957	no_diff
Com_197_pos	7-Demethylsuberosin	Phenylpropanoids	129069	615700	312800	104721	100650	166500	0.351628	-1.50788	0.181137	1.05501	no_diff
Com_25_neg	Morin	Flavonol	151300	156879	184652	67181	75812	163800	0.622512	-0.683827	0.181361	1.10007	no_diff
Com_273_pos	Diethanolamine	Polyamine	16180	27420	24490	24800	32530	35060	1.35688	0.440294	0.182835	1.00809	no_diff
Com_407_pos	D-Sorbitol	Sugar Alcohols	15450	14740	20770	34320	19040	21070	1.46056	0.546519	0.183444	1.00495	no_diff
Com_211_pos	Taurocholic acid sodium salt hydrate	Steroids	125900	107400	104600	189100	111300	201900	1.48653	0.571953	0.183723	1.0644	no_diff
Com_130_neg	2-Oxoadipic acid	Organic Acid And Its Derivatives	3587	3593	3975	7812	4034	5064	1.51591	0.600186	0.186778	1.08052	no_diff
Com_111_neg	D-Erythrose 4-phosphate	Organic oxygen compounds	3171	6726	5947	2787	2771	399	0.375978	-1.41128	0.186971	1.06388	no_diff
Com_107_neg	β-D-glucopyranosyl-caffeic acid	Polyphenol	1199	1195	2001	7943	3195	1591	2.89625	1.53418	0.190285	1.0383	no_diff
Com_328_pos	N-p-Cinnamoylputrescine	Polyamine	129800	76760	108400	90270	68820	72670	0.735839	-0.442537	0.193173	0.996343	no_diff
Com_409_pos	D-Glutamine	Amino Acid And Its Derivatives	217600	233200	213300	514600	230500	996700	2.6228	1.39111	0.200035	1.07965	no_diff
Com_445_pos	Uridine	Nucleotide And Its Derivates	108500	29100	17630	24490	9218	12870	0.300058	-1.73669	0.205584	0.990661	no_diff
Com_419_pos	N8-Acetylspermidine	Amino Acid And Its Derivatives	18160	12700	12640	13450	4661	8893	0.620782	-0.687842	0.208314	1.00056	no_diff
Com_84_neg	D-Fructose 6-phosphate	Carbohydrates	65790	183800	164000	96680	62560	58180	0.52569	-0.927717	0.212414	0.972782	no_diff
Com_237_pos	Phosphocreatine	Amino Acid And Its Derivatives	489300	787700	617100	172600	283700	643700	0.580751	-0.784009	0.214575	1.00415	no_diff
Com_343_pos	Thymidine	Nucleotide And Its Derivates	44430	79450	57280	65670	95150	80500	1.33208	0.413683	0.21475	0.944422	no_diff
Com_50_neg	D-Xylose	Carbohydrates	12710	5966	10350	7559	4380	6765	0.644388	-0.633999	0.216531	0.932006	no_diff
Com_28_neg	L-Arabinose	Carbohydrates	35010	30150	32560	29780	24200	12690	0.682255	-0.551616	0.22558	1.03424	no_diff
Com_301_pos	α-Keto-γ-(methylthio)butyric acid	Organic Acid And Its Derivatives	3372000	4093000	4521000	3280000	2647000	3901000	0.819957	-0.286381	0.227706	0.926371	no_diff
Com_150_neg	Succinic acid	Tca Cycle	397	3162	3160	788	397	397	0.235452	-2.0865	0.23159	0.968178	no_diff
Com_37_neg	Uridine 5'-diphospho-D-glucose	Nucleotide And Its Derivates	17790	12620	8682	71480	38280	11030	3.08989	1.62756	0.232798	0.982261	no_diff
Com_320_pos	Indole-3-Carboxaldehyde	Indole And Its Derivatives	2612	3148	556	4789	3412	4222	1.96691	0.975931	0.239053	0.993389	no_diff
Com_7_neg	L-3-Phenyllactic Acid	Organic Acid And Its Derivatives	1583	2372	1576	792	394	1987	0.573676	-0.801693	0.245543	0.956347	no_diff
Com_374_pos	D-(+)-Octopine	Amino Acid And Its Derivatives	6662	10640	9765	6119	4100	9018	0.710718	-0.492651	0.250596	0.896308	no_diff
Com_286_pos	Betaine	Alkaloids	347000	35590	657100	43770	52300	51170	0.141619	-2.81991	0.251153	0.978684	no_diff
Com_138_neg	Succinic anhydride	Organic Acid And Its Derivatives	75500	113800	83710	51090	53060	97140	0.737299	-0.439678	0.253668	0.894755	no_diff
Com_115_neg	Pseudouridine	Nucleotide And Its Derivates	5973	2791	3595	3853	2416	2007	0.669633	-0.578556	0.261026	0.870132	no_diff
Com_444_pos	Uracil	Nucleotide And Its Derivates	49250	11680	17230	20980	4301	9424	0.444025	-1.17129	0.262431	0.855025	no_diff
Com_178_pos	Patchouli alcohol	TCM	39370	7594	9650	11530	4819	4937	0.375985	-1.41125	0.270783	0.876533	no_diff
Com_300_pos	Viscumamide	Others	44720	42680	45160	50620	50430	42980	1.08653	0.119724	0.271204	0.911468	no_diff
Com_373_pos	D-Arabitol	Sugar Alcohols	307200	205900	389900	516800	322600	362500	1.33101	0.412519	0.275378	0.844698	no_diff
Com_110_neg	D-Fructose 1,6-bisphosphate	Sugar Acids And Its Derivatives	50320	51430	48280	45140	51070	41370	0.917017	-0.12498	0.27567	0.926663	no_diff
Com_179_pos	p-Anisaldehyde	Pyridine And Its Derivatives	19730	28940	31070	22195	14760	24550	0.771319	-0.3746	0.278078	0.837552	no_diff
Com_238_pos	Oleic acid	Lipids and lipid-like molecules	37470	38860	55980	31860	32970	42550	0.811579	-0.301197	0.278795	0.878469	no_diff
Com_298_pos	Sildenafil	Benzene and substituted derivatives	22350	18050	13800	20690	20280	24460	1.2072	0.271659	0.280394	0.870403	no_diff
Com_395_pos	1-Aminocyclopropanecarboxylic acid	Amino Acid And Its Derivatives	146100	209200	154600	90530	86230	193900	0.726927	-0.460118	0.284408	0.873481	no_diff
Com_221_pos	Sodium Taurocholate	Steroids	18200	7761	13250	6762	10760	8651	0.667491	-0.583179	0.286947	0.844162	no_diff
Com_410_pos	Melezitose	Carbohydrates	114500	160700	90690	417700	425400	87880	2.54443	1.34734	0.287698	0.906701	no_diff
Com_113_neg	D-Ribulose 5-phosphate	Carbohydrates	32580	34970	22620	34220	16700	12040	0.698237	-0.518212	0.290032	0.901629	no_diff
Com_294_pos	α-Nicotinamide adenine dinucleotide	Nucleotide And Its Derivates	3016	2684	2619	2359	5064	6739	1.70237	0.767543	0.290648	0.919153	no_diff
Com_240_pos	O-Acetylserine	Others	9379000	11060000	9290000	5642000	6031000	11240000	0.770729	-0.375705	0.29362	0.88924	no_diff
Com_41_neg	Abscisic acid	Phytohormones	9425	11840	9539	12630	4675	2658	0.648065	-0.625789	0.29515	0.920141	no_diff
Com_52_neg	γ,γ-Dimethylallyl pyrophosphate	Others	484300	609900	600800	119300	113800	842800	0.634749	-0.655741	0.299684	0.90456	no_diff
Com_76_neg	Phosphoenolpyruvic acid	Organic Acid And Its Derivatives	5516	33870	26650	8979	5522	9572	0.364544	-1.45584	0.300885	0.858004	no_diff
Com_369_pos	4-Pyridoxate	Pyridine And Its Derivatives	21660	7088	5313	16400	17660	15900	1.46678	0.552653	0.310276	0.873077	no_diff
Com_233_pos	N-(2-Hydroxyethyl)iminodiacetic acid	Organic Acid And Its Derivatives	172455	3360	150467	394600	85500	464500	2.89504	1.53358	0.313433	0.83869	no_diff
Com_310_pos	L-Glutamate	Amino Acid And Its Derivatives	5767000	6009000	5648000	3761000	3438000	6647000	0.794651	-0.331607	0.314912	0.876572	no_diff
Com_403_pos	L-Alanine	Amino Acid And Its Derivatives	58460	63620	33400	77850	49540	76270	1.30988	0.389434	0.320283	0.783594	no_diff
Com_312_pos	L-Cystine	Amino Acid And Its Derivatives	44060	25490	20200	24780	2479	20780	0.535253	-0.901706	0.323707	0.820107	no_diff
Com_63_neg	2-Deoxyribose 5'-phosphate	Carbohydrates	31490	102300	33440	31890	33850	22730	0.529032	-0.918573	0.326701	0.840745	no_diff
Com_318_pos	Dl-2-Aminooctanoic Acid	Organic Acid And Its Derivatives	28890	30870	30370	21010	13410	34080	0.760013	-0.395903	0.327753	0.852541	no_diff
Com_281_pos	Acetaminophen	Phenols	74760	30620	47470	57320	8424	26940	0.606372	-0.721724	0.337755	0.778432	no_diff
Com_116_neg	Galactinol	Carbohydrates	10730000	7768000	10180000	20890000	27820000	6991000	1.94229	0.957759	0.340066	0.820175	no_diff
Com_354_pos	iP9G	Others	136300	177400	132800	338400	316600	112400	1.7187	0.781319	0.341947	0.832722	no_diff
Com_360_pos	Oleamide	Fatty acid	5690	5500	1876	1895	4620	1176	0.588627	-0.764574	0.344959	0.785513	no_diff
Com_363_pos	Adenine	Nucleotide And Its Derivates	204900	213800	213100	300500	61540	87930	0.712203	-0.489639	0.348964	0.820492	no_diff
Com_359_pos	N-Acetylneuraminic acid	Amino Acid And Its Derivatives	36080	39940	40150	35200	35650	39380	0.948868	-0.0757206	0.349787	0.757572	no_diff
Com_58_neg	Prunindihydrochalcone	Phenols	18076	11783	3711	14229	9363	75410	2.94912	1.56029	0.350327	0.738942	no_diff
Com_172_pos	Trigonelline	Alkaloids	390400	103800	67960	26830	5412	282800	0.560413	-0.835437	0.353299	0.762208	no_diff
Com_250_pos	Nicotinic acid-hexoside	Polyphenol	185400	23590	655000	35780	76860	32450	0.16793	-2.57407	0.35537	0.786493	no_diff
Com_87_neg	ATP	Nucleotide And Its Derivates	1178	4345	5531	793	3181	1578	0.502262	-0.993489	0.356746	0.727388	no_diff
Com_338_pos	Artemisinin	Terpenoids	304000	322200	321300	290300	296900	323300	0.96095	-0.0574669	0.358116	0.767509	no_diff
Com_26_neg	Ononin	Isoflavonoids	1992	5199	3602	2493	2781	1996	0.673585	-0.570069	0.360539	0.765748	no_diff
Com_268_pos	LPC(1-acyl 16:1)	Fatty acid	2648	3460	6656	2128	1859	4630	0.675102	-0.566823	0.367262	0.758086	no_diff
Com_243_pos	N-Lauryldiethanolamine	Others	20530	13580	15930	29050	15040	20430	1.28937	0.366665	0.369417	0.716079	no_diff
Com_288_pos	10-Formyl-THF	Organic Acid And Its Derivatives	9538	232800	192700	9783	3905	133100	0.337414	-1.56741	0.374432	0.719012	no_diff
Com_356_pos	Sattabacin	Others	84350	114600	69260	171600	83700	101600	1.33067	0.412157	0.380764	0.719399	no_diff
Com_220_pos	(-)-N-[3',4'-Dihydroxy-(E)-cinnamoyl]-L-glutamic acid	Amino Acid And Its Derivatives	45490	45490	50680	37080	43940	48930	0.917337	-0.124476	0.382894	0.763111	no_diff
Com_9_neg	Rhamnetin	Flavonol	16110	14940	9532	34670	9280	27450	1.7594	0.815084	0.389652	0.71178	no_diff
Com_292_pos	beta-Carotene	Terpenoids	33830000	35030000	33670000	34180000	32290000	33920000	0.979128	-0.0304305	0.390038	0.688027	no_diff
Com_202_pos	8-Oxo-dGMP	Nucleotide And Its Derivates	7013	3480	9583	6067	3118	4332	0.673291	-0.570697	0.390416	0.694239	no_diff
Com_265_pos	LPC(1-acyl 18:2)	Fatty acid	539900	312200	370600	195700	183200	543200	0.754151	-0.407075	0.394138	0.722686	no_diff
Com_414_pos	dUDP	Nucleic acid derivative	642000	637800	703100	534000	646900	664000	0.930405	-0.104069	0.394595	0.7367	no_diff
Com_68_neg	N-Acetylthreonine	Amino Acid And Its Derivatives	5041	11270	8417	11620	8416	10400	1.23083	0.299633	0.403287	0.692962	no_diff
Com_124_neg	Trehalose	Carbohydrates	10080000	10270000	8797000	20680000	19150000	6958000	1.60524	0.682791	0.403521	0.759507	no_diff
Com_201_pos	8-Hydroxyguanosine	Nucleotide And Its Derivates	7241	13800	18770	12480	10250	4782	0.691065	-0.533106	0.409118	0.66008	no_diff
Com_431_pos	Pipecolic acid	Organic Acid And Its Derivatives	128700	156000	129300	76920	78740	179700	0.810048	-0.30392	0.409182	0.726583	no_diff
Com_75_neg	Sucrose	Carbohydrates	9810000	9335000	9275000	18850000	20970000	6644000	1.6349	0.709207	0.412705	0.741818	no_diff
Com_335_pos	2-Pyridinecarboxylic acid	Pyridine And Its Derivatives	42490	6654	106200	15810	9270	16560	0.26805	-1.89942	0.412779	0.720493	no_diff
Com_184_pos	Jasmonic acid	Phytohormones	5372	10780	8772	10980	2111	4943	0.72356	-0.466816	0.415691	0.675178	no_diff
Com_65_neg	dGMP	Nucleotide And Its Derivates	139488	69160	117400	5224	224200	35150	0.811457	-0.301413	0.416512	0.698256	no_diff
Com_18_neg	2-Isopropylmalic acid	Organic Acid And Its Derivatives	69040	31000	59000	65380	21110	29880	0.731703	-0.45067	0.42327	0.641122	no_diff
Com_302_pos	1-Hexadecanol	Lipids and lipid-like molecules	179400	193100	196200	192300	195200	196700	1.02726	0.0387946	0.423833	0.706055	no_diff
Com_322_pos	Pyridoxine	Vitamins	25550	11660	4481	19900	18340	16250	1.307	0.386256	0.427711	0.709905	no_diff
Com_418_pos	N6-Succinyl Adenosine	Nucleotide And Its Derivates	169600	160000	105600	177100	89130	86480	0.810455	-0.303196	0.431757	0.695262	no_diff
Com_423_pos	6-Gingerol	Phenols	113200	132400	138700	116200	150300	163600	1.11918	0.162439	0.436526	0.683548	no_diff
Com_140_neg	3-Dehydroshikimic acid	Organic Acid And Its Derivatives	330700	402600	406700	271400	493900	149400	0.802368	-0.317663	0.439212	0.689317	no_diff
Com_120_neg	Coniferin	Phenols	15500000	16690000	15740000	31870000	26850000	11570000	1.46651	0.552391	0.444176	0.703776	no_diff
Com_186_pos	Denin	Flavonoids	11990	6903	7110	8650	8380	2688	0.758297	-0.399165	0.452423	0.678434	no_diff
Com_367_pos	Przewaquinone A	Quinones	108300	113500	101300	88130	89020	119800	0.919065	-0.121761	0.455153	0.646889	no_diff
Com_200_pos	Nuciferin	Alkaloids	66950	56120	57530	53880	44590	65470	0.907752	-0.13963	0.456404	0.624964	no_diff
Com_346_pos	(2S,3R)-2-{[{9-[(2R,3R,4S,5R)-3,4-Dihydroxy-5-(hydroxymethyl)tetrahydro-2-furanyl]-9H-purin-6-yl}(methyl)carbamoyl]amino}-3-hydroxybutanoic acid (non-preferred name)	Nucleic acid derivative	2474	3920	622	5794	1653	3307	1.53278	0.616153	0.457241	0.629949	no_diff
Com_135_neg	Salicylic acid O-glucoside	Phytohormones	14210	7811	5089	190000	5946	8642	7.54659	2.91582	0.481632	0.623759	no_diff
Com_88_neg	Adenosine 5'-monophosphate	Nucleotide And Its Derivates	136811	71120	77490	4720	245700	36060	1.00371	0.00534294	0.488546	0.598894	no_diff
Com_413_pos	Cytidine	Nucleotide And Its Derivates	68420	27460	27160	61670	8129	21710	0.743734	-0.427142	0.491948	0.577173	no_diff
Com_199_pos	6-Hydroxynicotinic acid	Pyridine And Its Derivatives	13630	17480	21070	19140	15630	26030	1.1652	0.220574	0.495043	0.617275	no_diff
Com_164_pos	Proline	Amino Acid And Its Derivatives	207900	280400	204100	255600	186500	594700	1.4974	0.58246	0.495919	0.610334	no_diff
Com_337_pos	Neochlorogenic acid	Polyphenol	11210	3499	1055	3222	987	2255	0.410048	-1.28613	0.501832	0.582466	no_diff
Com_304_pos	Threonine	Amino Acid And Its Derivatives	18790	12070	8965	16556	11820	18040	1.1655	0.220948	0.512238	0.539662	no_diff
Com_282_pos	Acetylcholine	Others	32550	22690	29460	21240	12840	37640	0.846753	-0.239986	0.512276	0.587475	no_diff
Com_448_pos	Glycyl-L-Leucine	Amino Acid And Its Derivatives	7846	1921	5817	9438	5098	5235	1.26867	0.34332	0.513619	0.544884	no_diff
Com_262_pos	Palmitic acid	Lipids and lipid-like molecules	31400	34920	44660	42940	37350	39280	1.0774	0.107556	0.515514	0.574335	no_diff
Com_187_pos	4-Hydroxy-6-methylquinoline-3-carboxylic acid	Amino Acid And Its Derivatives	8780	10710	16420	11450	13510	3785	0.800473	-0.321075	0.518966	0.558233	no_diff
Com_5_neg	Raffinose	Carbohydrates	123100	157600	134800	142900	229800	124100	1.19567	0.257817	0.520745	0.555064	no_diff
Com_218_pos	(+-)-Baclofen	Others	392100	383700	354300	389700	403300	369200	1.0284	0.0404079	0.520966	0.59007	no_diff
Com_422_pos	N-Acetyl-L-histidine	Amino Acid And Its Derivatives	12120	4189	7005	14920	5416	10660	1.3295	0.410885	0.52845	0.509014	no_diff
Com_48_neg	Dulcitol	Carbohydrates	6374	9760	6379	3185	5595	10190	0.842624	-0.247039	0.531628	0.546678	no_diff
Com_219_pos	2-Amino-4-hydroxybutyric acid	Amino Acid And Its Derivatives	12510	7656	9340	7673	3472	13660	0.840676	-0.250377	0.537638	0.54234	no_diff
Com_275_pos	Lactucin	Others	26210	14690	16140	17320	12370	18590	0.846424	-0.240548	0.53955	0.499751	no_diff
Com_437_pos	Hypoxanthine-9-β-D-Arabinofuranoside	Nucleotide And Its Derivates	16680	681500	614300	24040	164200	110100	0.22731	-2.13727	0.544952	0.516621	no_diff
Com_334_pos	2-Phenylglycine	Amino Acid And Its Derivatives	63680	38530	36890	77970	10480	31000	0.858735	-0.219716	0.546161	0.522879	no_diff
Com_226_pos	D-Glucosamine	Carbohydrates	169500	145300	180700	107400	97100	234600	0.886176	-0.174336	0.551798	0.576556	no_diff
Com_147_neg	LysoPA 18:0	Glycerophospholipids	3206	4382	5261	3198	5204	2805	0.872208	-0.197256	0.555784	0.479213	no_diff
Com_230_pos	L-Homocarnosine	Amino Acid And Its Derivatives	132400	107900	91230	135500	74240	85590	0.890809	-0.166812	0.556044	0.530273	no_diff
Com_239_pos	Nα-Acetyl-L-Arginine	Amino Acid And Its Derivatives	28640	44870	37090	21670	23236	51480	0.871483	-0.198456	0.557515	0.532789	no_diff
Com_22_neg	Poricoic Acid B	TCM	4952	4736	5369	4893	5414	3785	0.93591	-0.095558	0.55805	0.521993	no_diff
Com_368_pos	Niacinamide	Vitamins	130900	88990	75340	120400	44450	85700	0.84866	-0.236741	0.562676	0.488136	no_diff
Com_174_pos	N', N''-DiFeruloylspermidine	Phenolamides	10400	8414	5802	6482	6227	8603	0.865778	-0.20793	0.56567	0.47756	no_diff
Com_345_pos	Thymine	Nucleotide And Its Derivates	8232	1966	5986	5388	6618	6624	1.15114	0.203059	0.565852	0.519961	no_diff
Com_227_pos	Methyl arachidonate	Lipids and lipid-like molecules	5654	4979	4161	4583	4213	4992	0.931999	-0.101599	0.566127	0.484222	no_diff
Com_401_pos	L-Asparagine	Amino Acid And Its Derivatives	41610	29080	23130	34430	21600	92810	1.58644	0.665795	0.567939	0.509015	no_diff
Com_331_pos	5-Methylcytosine	Nucleotide And Its Derivates	1916	6745	930	1686	890	2332	0.51173	-0.966546	0.570029	0.490957	no_diff
Com_235_pos	3-Hydroxy-9,10-Dimethoxypterocarpan	Others	14150	10060	11480	16480	9471	15260	1.15469	0.20751	0.571661	0.470898	no_diff
Com_411_pos	Cytosine	Nucleotide And Its Derivates	24070	11240	6443	18520	4483	7466	0.729744	-0.454538	0.574341	0.497872	no_diff
Com_289_pos	14,15-Dehydrocrepenynic acid	Fatty acid	49420	52050	61260	85080	40050	20480	0.894795	-0.160371	0.578534	0.533014	no_diff
Com_175_pos	N', N''-DiFeruloylagamtine-N-arabinoside	Phenolamides	7137	4031	4467	8140	5511	4466	1.15875	0.212565	0.583781	0.480674	no_diff
Com_425_pos	4-Acetamidobutyric Acid	Organic Acid And Its Derivatives	31310	19000	17420	88930	10590	36620	2.01004	1.00722	0.588584	0.465785	no_diff
Com_204_pos	Stigmasterol	Lipids and lipid-like molecules	2899	3023	3200	2375	2981	3286	0.94738	-0.0779849	0.589729	0.527929	no_diff
Com_253_pos	8-hydroxy-6,7-dimethoxycoumarin	Phenylpropanoids	643500	816500	545600	882400	507500	968810	1.17606	0.233964	0.592871	0.442471	no_diff
Com_362_pos	Adenosine	Nucleotide And Its Derivates	104700	6792000	6050000	167300	1427000	1181000	0.214364	-2.22187	0.59608	0.460826	no_diff
Com_421_pos	N-Acetyl-Dl-glutamic acid	Amino Acid And Its Derivatives	366900	236200	341400	502100	283900	305900	1.15606	0.209218	0.598331	0.431898	no_diff
Com_180_pos	Panaxydol	Lipids and lipid-like molecules	5564	11210	3190	8236	7210	6544	1.10148	0.139447	0.604035	0.508633	no_diff
Com_54_neg	Isorhapontigenin	Phenylpropanoids and polyketides	2930	15900	23970	7527	6333	7324	0.494953	-1.01464	0.608435	0.461687	no_diff
Com_173_pos	N', N''-Dicaffeoylspermidine	Polyamine	3935	2438	3204	1715	3821	2962	0.887334	-0.17245	0.612425	0.433339	no_diff
Com_125_neg	Trehalose 6-phosphate	Carbohydrates	14740	13170	8744	15130	7955	9410	0.886534	-0.173753	0.618432	0.477419	no_diff
Com_109_neg	Uridine 5'-diphosphate	Nucleotide And Its Derivates	1591	18940	10650	2367	2355	12600	0.555531	-0.848062	0.618519	0.441011	no_diff
Com_285_pos	Swainsonine	Alkaloids	182600	189100	292500	343500	180300	240000	1.14995	0.201577	0.621475	0.415771	no_diff
Com_277_pos	5-Ethyl-2'-deoxyuridine	Nucleic acid derivative	20450	16430	23740	28110	15060	11840	0.907456	-0.1401	0.621868	0.440128	no_diff
Com_72_neg	Malic acid	Tca Cycle	545700	676500	828800	332800	157600	1795000	1.11429	0.156119	0.641574	0.471573	no_diff
Com_389_pos	N-(9H-Purin-6-ylcarbamoyl)threonine	Nucleic acid derivative	24700	19080	24020	27980	16640	18630	0.932891	-0.10022	0.651847	0.38463	no_diff
Com_101_neg	Quercetin 3-β-D-glucoside	Glycosides	311800	37140	13290	20926	68362	24051	0.312892	-1.67626	0.656698	0.414587	no_diff
Com_79_neg	Flavin Adenine Dinucleotide	Nucleotide And Its Derivates	2028	2746	1822	1715	1606	2733	0.917829	-0.123703	0.658798	0.371384	no_diff
Com_53_neg	Laricitrin	Flavonol	1757	19020	27070	7282	4164	7848	0.403244	-1.31028	0.659476	0.399627	no_diff
Com_269_pos	LPC(1-acyl 16:0)	Fatty acid	181600	169900	163900	154000	85780	241400	0.933605	-0.0991159	0.65956	0.413877	no_diff
Com_364_pos	Adenosine 5'-Diphosphate	Nucleotide And Its Derivates	3021	2797	6788	4754	4162	4480	1.06267	0.0876917	0.660911	0.452462	no_diff
Com_293_pos	Sibutramine	Benzene and substituted derivatives	44930	41230	49610	45340	39890	46000	0.966561	-0.0490672	0.661224	0.423729	no_diff
Com_442_pos	Maltitol	Sugar Alcohols	2220	5664	4144	4506	620	6069	0.930745	-0.103542	0.664046	0.380534	no_diff
Com_55_neg	Isomucronulatol-7-O-glucoside	Flavonoids	114500	20265	6445	20108	10340	20050	0.357609	-1.48354	0.665965	0.402739	no_diff
Com_231_pos	L-Homocystine	Amino Acid And Its Derivatives	7453	553400	448900	19030	113600	96200	0.22662	-2.14165	0.667178	0.383942	no_diff
Com_408_pos	D-Proline	Amino Acid And Its Derivatives	489600	583900	434800	458500	362400	1353000	1.44129	0.527362	0.677307	0.417393	no_diff
Com_295_pos	L-Methionine sulfone	Amino Acid And Its Derivatives	5545	6187	3533	7442	4576	4848	1.10488	0.14389	0.677763	0.435597	no_diff
Com_129_neg	Vitamin D3	Vitamins	7037	4293	7665	10700	6258	5070	1.15967	0.213719	0.680144	0.343196	no_diff
Com_157_pos	1-Methyladenosine	Nucleotide And Its Derivates	18940	22480	12840	31890	6765	13150	0.954755	-0.0667977	0.68407	0.385575	no_diff
Com_56_neg	Adipic acid	Organic Acid And Its Derivatives	236400	251500	229500	269800	65000	367200	0.978534	-0.0313067	0.685163	0.368838	no_diff
Com_73_neg	D-Glucose 6-phosphate	Carbohydrates	296300	666200	514900	386300	615400	276900	0.865439	-0.208495	0.68597	0.354286	no_diff
Com_30_neg	L-Saccharopine	Amino Acid And Its Derivatives	67110	35030	33670	43360	24590	171200	1.76092	0.816326	0.6872	0.393283	no_diff
Com_358_pos	β-Alanine	Amino Acid And Its Derivatives	204100	191700	211500	358600	130400	104200	0.976782	-0.0338908	0.688341	0.408073	no_diff
Com_141_neg	3-Hydroxy-4-methyl-3-carboxypentanoate	Others	24930	28680	23380	22650	23690	40690	1.13041	0.176842	0.689866	0.397364	no_diff
Com_86_neg	Methyl indole-3-acetate	Phytohormones	9561	8757	11120	11960	7199	8767	0.948638	-0.0760707	0.698944	0.326114	no_diff
Com_429_pos	Azelaic Acid	Organic Acid And Its Derivatives	18470	7544	13450	27590	12020	9465	1.24354	0.314451	0.702102	0.334271	no_diff
Com_251_pos	Apo-13-zeaxanthinone	Others	24050	32110	39430	47910	25980	15710	0.937337	-0.093361	0.706045	0.361713	no_diff
Com_44_neg	9-Hotre	Fatty acid	3057	2701	5166	6256	2960	1208	0.954229	-0.0675922	0.707449	0.355434	no_diff
Com_394_pos	Nortanshinone	Quinones	186400	214900	182500	177000	196700	194800	0.973792	-0.0383139	0.707682	0.317323	no_diff
Com_217_pos	(-)-Norepinephrine N-hexoside	Others	31380	14450	29100	19820	13850	31950	0.875751	-0.191408	0.713867	0.380366	no_diff
Com_297_pos	Sinensetin	Flavonoids	11630	5462	12310	7262	12810	11970	1.08979	0.12405	0.731496	0.367882	no_diff
Com_248_pos	Neocryptotanshinone	Quinones	81150	86970	69790	71470	85150	89570	1.0348	0.0493562	0.738361	0.274765	no_diff
Com_15_neg	D-Xylulose 5-phosphate	Carbohydrates	5922	11430	7890	3543	5915	15380	0.983995	-0.0232772	0.746117	0.34738	no_diff
Com_416_pos	Quercetin 3-D-galactoside	Flavonoids	24750	33750	20090	32800	19500	33240	1.08843	0.122253	0.750795	0.269696	no_diff
Com_225_pos	Glu-Glu	Amino Acid And Its Derivatives	6786	5500	5262	11080	6791	1310	1.09306	0.128371	0.756811	0.397735	no_diff
Com_156_pos	D-3-Phosphoglyceric acid	Lipids and lipid-like molecules	50500	29320	35070	36280	41460	40920	1.03281	0.0465805	0.761064	0.266211	no_diff
Com_103_neg	Crotonoside	Alkaloids	37540	74540	105900	30220	42830	134900	0.953987	-0.0679591	0.764636	0.392197	no_diff
Com_60_neg	Fructose	Carbohydrates	11570	14760	21590	125400	10790	6786	2.98364	1.57707	0.770975	0.298246	no_diff
Com_379_pos	2-Hydroxy-6-Aminopurine	Nucleotide And Its Derivates	49970	27840	33230	88080	10870	26380	1.12869	0.174652	0.775793	0.262618	no_diff
Com_366_pos	Adenosine O-ribose	Nucleic acid derivative	6655	2039	5369	4568	2714	4049	0.805731	-0.311629	0.77654	0.263925	no_diff
Com_412_pos	CMP	Nucleotide And Its Derivates	7275	45930	40510	8129	47870	17410	0.783322	-0.352323	0.78388	0.237889	no_diff
Com_14_neg	Curcumin	Phenols	21890	8239	19090	21490	12000	9455	0.872529	-0.196725	0.783891	0.233253	no_diff
Com_387_pos	DL-Pipecolinic acid	Organic Acid And Its Derivatives	412700	445500	328400	336200	264600	553100	0.972442	-0.0403155	0.793063	0.249704	no_diff
Com_252_pos	ANGELOL-K	TCM	941600	919200	715700	683700	1398000	793300	1.11585	0.158149	0.795272	0.245355	no_diff
Com_276_pos	Neotuberostemonine	Alkaloids	20000000	18600000	15800000	14500000	29820000	16570000	1.1193	0.162599	0.798963	0.237084	no_diff
Com_361_pos	N-Acetylserotonin	Amino Acid And Its Derivatives	28860	12500	16820	25660	12070	14950	0.905466	-0.143268	0.799665	0.228755	no_diff
Com_36_neg	Betulinic acid	Terpenoids	21360	25530	17930	18830	19110	24560	0.964209	-0.0525828	0.81361	0.195091	no_diff
Com_272_pos	alpha-Linolenic acid	Lipids and lipid-like molecules	10820	15540	3591	18810	3157	17590	1.32072	0.401329	0.815978	0.20956	no_diff
Com_43_neg	Sesamoside +HCOOH	Terpenoids	5520	11104	10977	26160	3705	4128	1.23159	0.300517	0.816915	0.243542	no_diff
Com_332_pos	2-Methyladenosine	Nucleic acid derivative	47280	49120	47760	68210	22860	54990	1.01318	0.0188902	0.821493	0.199304	no_diff
Com_23_neg	Pyrroloquinoline quinone	Alkaloids	4958000	4327000	5314000	4873000	4756000	5143000	1.01185	0.0169956	0.83534	0.333386	no_diff
Com_355_pos	Inosine-5'-monophosphate	Nucleotide And Its Derivates	5087	153200	99010	2512	184100	56880	0.946346	-0.0795603	0.840673	0.210805	no_diff
Com_449_pos	N-Feruloylserotonin	Ployphenol	1692	2879	6909	5614	4919	1735	1.06864	0.0957774	0.841998	0.166181	no_diff
Com_176_pos	N,N-Dimethylformamide	Organic Acid And Its Derivatives	571200	478900	79490	443800	463900	163800	0.948574	-0.0761674	0.850882	0.363566	no_diff
Com_144_neg	LysoPA 18:0 (2n isomer)	Glycerophospholipids	6780	14810	7979	12750	13960	5585	1.09219	0.127225	0.858104	0.304654	no_diff
Com_206_pos	Protocatechuic Acid	Phenols And Its Derivatives	60400	46270	60430	86370	31350	52340	1.01771	0.0253321	0.863579	0.149182	no_diff
Com_424_pos	4-Guanidinobutyric acid	Organic Acid And Its Derivatives	27980	14310	21870	25170	15950	24840	1.02805	0.0399173	0.869606	0.173683	no_diff
Com_137_neg	GMP	Nucleotide And Its Derivates	404	5142	5943	2029	2526	3946	0.739925	-0.434549	0.869678	0.214523	no_diff
Com_232_pos	Histamine	Amino Acid And Its Derivatives	8148	3342	7910	6913	6334	5760	0.979742	-0.0295258	0.874833	0.171416	no_diff
Com_447_pos	Epigoitrin	Others	140700	134400	161100	220800	107100	113700	1.01238	0.0177504	0.875891	0.177402	no_diff
Com_193_pos	Biotin	Vitamins	166900	163200	132100	142400	137700	174300	0.983124	-0.0245544	0.877898	0.127337	no_diff
Com_90_neg	N-Acetyl-L-glutamic acid	Amino Acid And Its Derivatives	10770	7980	4386	11170	4394	6380	0.948479	-0.0763129	0.878163	0.253071	no_diff
Com_42_neg	Sebacic acid	Organic Acid And Its Derivatives	34700	39860	36240	39130	32310	41350	1.01796	0.0256813	0.879474	0.150944	no_diff
Com_404_pos	L-Ascorbate	Vitamins	557700	525400	524600	517300	530200	570100	1.00616	0.00885668	0.881174	0.215237	no_diff
Com_102_neg	Quercetin-3'-O-glucoside	TCM	500500	2130	13300	19011	76382	21914	0.22737	-2.13689	0.884473	0.127171	no_diff
Com_259_pos	Gentiobiose	Carbohydrates	6860	9537	7012	15290	7134	3536	1.10898	0.149227	0.905419	0.306386	no_diff
Com_71_neg	Aminomalonic acid	Organic Acid And Its Derivatives	34800	24900	41120	14300	26550	119600	1.59145	0.670342	0.911098	0.329902	no_diff
Com_161_pos	Allopurinol	Nucleotide And Its Derivates	69620	16050	19350	94060	10370	16820	1.15454	0.207321	0.915958	0.176035	no_diff
Com_145_neg	N-Acetyl-D-Glucosamine	Carbohydrates	1599	5960	2401	4763	1591	3572	0.996586	-0.00493329	0.917808	0.102586	no_diff
Com_119_neg	Ferulic Acid	Polyphenol	22100	2009	7613	28130	8033	2001	1.20308	0.266729	0.929644	0.173172	no_diff
Com_64_neg	dGDP	Nucleotide And Its Derivates	2386	7778	2310	2822	2629	5146	0.849527	-0.235268	0.937279	0.0690365	no_diff
Com_405_pos	Vitamin B2	Vitamins	19240	4948	5549	9913	5855	10270	0.87561	-0.19164	0.937899	0.0714952	no_diff
Com_436_pos	IAA-Glu	Phytohormones	11930	8074	11900	18410	7818	8559	1.09036	0.124811	0.941642	0.102658	no_diff
Com_208_pos	beta-Nicotinamide mononucleotide	Nucleotide And Its Derivates	2699	110000	90250	11840	37440	48640	0.482486	-1.05144	0.959072	0.151735	no_diff
Com_255_pos	Topotecan	Alkaloids	9554000	8620000	7672000	7205000	10560000	8151000	1.00271	0.00390204	0.964558	0.0995309	no_diff
Com_146_neg	beta-D-Lactose	Carbohydrates	1291000	2174000	2319000	2779000	2653000	829700	1.08259	0.114487	0.965371	0.200639	no_diff
Com_210_pos	16-Hydroxy-hexadecanoic acid	Fatty acid	12000	7571	9769	8089	11360	9455	0.98514	-0.0215997	0.968002	0.0767019	no_diff
Com_353_pos	L-Pipecolate	Amino Acid And Its Derivatives	112000	141900	120800	124000	75210	198900	1.06248	0.0874311	0.97164	0.172879	no_diff
Com_296_pos	S-Methyl-L-cysteine	Amino Acid And Its Derivatives	470200	117400	104200	569000	79290	138800	1.13774	0.186174	0.972121	0.162952	no_diff
Com_97_neg	dTMP	Nucleotide And Its Derivates	5456	10630	4320	7689	3948	7958	0.960257	-0.0585078	0.974241	0.0944249	no_diff
Com_81_neg	Parishin E	Phenols	71220	65940	58200	58060	76800	61890	1.00712	0.0102285	0.976802	0.138941	no_diff
Com_188_pos	Curcumol	Lipids and lipid-like molecules	5984	6369	5222	6202	4600	6890	1.00666	0.00957246	0.977453	0.0336919	no_diff
Com_266_pos	δ-Hexanolactone	Lactones	175400	121200	180000	249100	133300	118000	1.04994	0.0703028	0.977996	0.109914	no_diff
Com_264_pos	LPC(1-acyl 18:3)	Fatty acid	38170	28960	31680	32320	19980	55720	1.09321	0.128569	0.978894	0.198899	no_diff
Com_8_neg	Kinsenoside	TCM	60660	70570	55230	83550	44470	64630	1.0332	0.047116	0.980861	0.108281	no_diff
Com_365_pos	Adenosine-3'-monophosphate	Nucleotide And Its Derivates	49470	1808000	1175000	92280	2103000	486600	0.884388	-0.177249	0.981616	0.0942285	no_diff
Com_378_pos	2'-Deoxycytidine 5'-diphosphate	Nucleic acid derivative	733100	696400	793800	658500	801300	771400	1.00355	0.00511721	0.984817	0.25083	no_diff
Com_213_pos	Hypoxanthine	Nucleotide And Its Derivates	19130	9575	30500	13250	15370	27970	0.955831	-0.0651719	0.988169	0.332879	no_diff
Com_242_pos	Sinapic acid	Organic Acid And Its Derivatives	1394000	954200	759200	1307000	867900	883900	0.98436	-0.0227422	0.991969	0.240434	no_diff
Com_299_pos	Serotonin	Indole And Its Derivatives	2198	4470	607	1879	735	4363	0.959038	-0.0603404	0.996694	0.0505671	no_diff

## Sheet: Amino acid 
Supplementary Table S1. List of all Amino acid detected in Mikania micrantha leaves under control and treatment.	Supplementary Table S1. List of all metabolites detected in Mikania micrantha leaves under control and treatment.	Supplementary Table S1. List of all metabolites detected in Mikania micrantha leaves under control and treatment.	Supplementary Table S1. List of all metabolites detected in Mikania micrantha leaves under control and treatment.	Supplementary Table S1. List of all metabolites detected in Mikania micrantha leaves under control and treatment.	Supplementary Table S1. List of all metabolites detected in Mikania micrantha leaves under control and treatment.	Supplementary Table S1. List of all metabolites detected in Mikania micrantha leaves under control and treatment.	Supplementary Table S1. List of all metabolites detected in Mikania micrantha leaves under control and treatment.	Supplementary Table S1. List of all metabolites detected in Mikania micrantha leaves under control and treatment.	Supplementary Table S1. List of all metabolites detected in Mikania micrantha leaves under control and treatment.	Supplementary Table S1. List of all metabolites detected in Mikania micrantha leaves under control and treatment.	Supplementary Table S1. List of all metabolites detected in Mikania micrantha leaves under control and treatment.	Supplementary Table S1. List of all metabolites detected in Mikania micrantha leaves under control and treatment.	Supplementary Table S1. List of all metabolites detected in Mikania micrantha leaves under control and treatment.	Supplementary Table S1. List of all metabolites detected in Mikania micrantha leaves under control and treatment.	Supplementary Table S1. List of all metabolites detected in Mikania micrantha leaves under control and treatment.	Supplementary Table S1. List of all metabolites detected in Mikania micrantha leaves under control and treatment.	Supplementary Table S1. List of all metabolites detected in Mikania micrantha leaves under control and treatment.	Supplementary Table S1. List of all metabolites detected in Mikania micrantha leaves under control and treatment.	Supplementary Table S1. List of all metabolites detected in Mikania micrantha leaves under control and treatment.	Supplementary Table S1. List of all metabolites detected in Mikania micrantha leaves under control and treatment.	Supplementary Table S1. List of all metabolites detected in Mikania micrantha leaves under control and treatment.	Supplementary Table S1. List of all metabolites detected in Mikania micrantha leaves under control and treatment.	Supplementary Table S1. List of all metabolites detected in Mikania micrantha leaves under control and treatment.	Supplementary Table S1. List of all metabolites detected in Mikania micrantha leaves under control and treatment.	Supplementary Table S1. List of all metabolites detected in Mikania micrantha leaves under control and treatment.	Supplementary Table S1. List of all metabolites detected in Mikania micrantha leaves under control and treatment.	Supplementary Table S1. List of all metabolites detected in Mikania micrantha leaves under control and treatment.	Supplementary Table S1. List of all metabolites detected in Mikania micrantha leaves under control and treatment.	Supplementary Table S1. List of all metabolites detected in Mikania micrantha leaves under control and treatment.	Supplementary Table S1. List of all metabolites detected in Mikania micrantha leaves under control and treatment.	Supplementary Table S1. List of all metabolites detected in Mikania micrantha leaves under control and treatment.	Supplementary Table S1. List of all metabolites detected in Mikania micrantha leaves under control and treatment.	Supplementary Table S1. List of all metabolites detected in Mikania micrantha leaves under control and treatment.	Supplementary Table S1. List of all metabolites detected in Mikania micrantha leaves under control and treatment.	Supplementary Table S1. List of all metabolites detected in Mikania micrantha leaves under control and treatment.	Supplementary Table S1. List of all metabolites detected in Mikania micrantha leaves under control and treatment.	Supplementary Table S1. List of all metabolites detected in Mikania micrantha leaves under control and treatment.	Supplementary Table S1. List of all metabolites detected in Mikania micrantha leaves under control and treatment.	Supplementary Table S1. List of all metabolites detected in Mikania micrantha leaves under control and treatment.	Supplementary Table S1. List of all metabolites detected in Mikania micrantha leaves under control and treatment.	Supplementary Table S1. List of all metabolites detected in Mikania micrantha leaves under control and treatment.	Supplementary Table S1. List of all metabolites detected in Mikania micrantha leaves under control and treatment.	Supplementary Table S1. List of all metabolites detected in Mikania micrantha leaves under control and treatment.	Supplementary Table S1. List of all metabolites detected in Mikania micrantha leaves under control and treatment.	Supplementary Table S1. List of all metabolites detected in Mikania micrantha leaves under control and treatment.	Supplementary Table S1. List of all metabolites detected in Mikania micrantha leaves under control and treatment.	Supplementary Table S1. List of all metabolites detected in Mikania micrantha leaves under control and treatment.	Supplementary Table S1. List of all metabolites detected in Mikania micrantha leaves under control and treatment.	Supplementary Table S1. List of all metabolites detected in Mikania micrantha leaves under control and treatment.
Compound_ID	Name	Class(English)	CK1	CK2	CK3	A1	A2	A3	FC	log2FC	Pvalue	VIP	sig
Com_352_pos	L-Tryptophan	Amino Acid	182300	192600	113400	550100	409400	600900	3.19558	1.67608	0.00645935	1.47193	up
Com_406_pos	L-Citrulline	Amino Acid	14470	25120	22890	68960	48840	160300	4.45102	2.15414	0.040602	1.36716	up
Com_229_pos	Histidine	Amino Acid	5438	6982	4402	18600	6178	30020	3.25752	1.70377	0.155882	1.12591	no_diff
Com_396_pos	L-Phenylalanine	Amino Acid	357700	243600	347000	725000	495000	1574000	2.94633	1.55892	0.0895546	1.26752	no_diff
Com_409_pos	D-Glutamine	Amino Acid	217600	233200	213300	514600	230500	996700	2.6228	1.39111	0.200035	1.07965	no_diff
Com_182_pos	L-Isoleucine	Amino Acid	346900	330300	218100	582600	460700	957400	2.23467	1.16006	0.0478857	1.29559	up
Com_181_pos	L-Leucine	Amino Acid	757500	761700	419900	1217000	990900	1960000	2.1494	1.10393	0.0548612	1.25075	no_diff
Com_315_pos	D-Norvaline	Amino Acid	69010	60790	109400	142300	90230	253100	2.03023	1.02164	0.149654	1.09751	no_diff
Com_30_neg	L-Saccharopine	Amino Acid	67110	35030	33670	43360	24590	171200	1.76092	0.816326	0.6872	0.393283	no_diff
Com_401_pos	L-Asparagine	Amino Acid	41610	29080	23130	34430	21600	92810	1.58644	0.665795	0.567939	0.509015	no_diff
Com_164_pos	Proline	Amino Acid	207900	280400	204100	255600	186500	594700	1.4974	0.58246	0.495919	0.610334	no_diff
Com_408_pos	D-Proline	Amino Acid	489600	583900	434800	458500	362400	1353000	1.44129	0.527362	0.677307	0.417393	no_diff
Com_350_pos	L-Serine	Amino Acid	118100	153400	131800	192900	154100	184700	1.31837	0.398759	0.0539998	1.2544	no_diff
Com_403_pos	L-Alanine	Amino Acid	58460	63620	33400	77850	49540	76270	1.30988	0.389434	0.320283	0.783594	no_diff
Com_304_pos	Threonine	Amino Acid	18790	12070	8965	16556	11820	18040	1.1655	0.220948	0.512238	0.539662	no_diff
Com_310_pos	L-Glutamate	Amino Acid	5767000	6009000	5648000	3761000	3438000	6647000	0.794651	-0.331607	0.314912	0.876572	no_diff
Com_312_pos	L-Cystine	Amino Acid	44060	25490	20200	24780	2479	20780	0.535253	-0.901706	0.323707	0.820107	no_diff
Com_153_neg	Allysine	Amino Acid	3588	2389	6774	800	794	1592	0.249863	-2.00079	0.0268229	1.3629	down
Com_231_pos	L-Homocystine	Amino Acid	7453	553400	448900	19030	113600	96200	0.22662	-2.14165	0.667178	0.383942	no_diff
[truncated: 5,000 more columns]
