# Supplementary material for: Metabolomics and Transcriptomics Reveal the Response Mechanisms of Mikania micrantha to Puccinia spegazzinii Infection
Source: Microorganisms. 2023 Mar 7;11(3):678. doi: 10.3390/microorganisms11030678 (PMC10057677; doi:10.3390/microorganisms11030678)
Supplement: Supplementary file 1 [file microorganisms-11-00678-s001.zip › Supplementary Table 2.xlsx]

## Sheet: Sheet1
Table S2. Summary of Mikania micrantha transcriptome mapping under control and treatment.
Sample	Encoding	Sequence length	Raw Reads	Raw Read(G)	Clean Reads	Clean Base(G)
CK-1	Sanger / Illumina 1.9	150	20577803	6.173	19752666	5.926
CK-2	Sanger / Illumina 1.9	150	23224869	6.967	22393603	6.718
CK-3	Sanger / Illumina 1.9	150	22746288	6.824	21845584	6.554
A-1	Sanger / Illumina 1.9	150	23287591	6.986	22343789	6.703
A-2	Sanger / Illumina 1.9	150	21594840	6.478	20651194	6.195
A-3	Sanger / Illumina 1.9	150	21810697	6.543	20833453	6.25
Average	Sanger / Illumina 1.9	150	2.2207e+07	6.66183	2.13034e+07	6.391
Total	Sanger / Illumina 1.9	150	133242088	39.971	127820289	38.346
