# Supplementary material for: Metabolomics and Transcriptomics Reveal the Response Mechanisms of Mikania micrantha to Puccinia spegazzinii Infection
Source: Microorganisms. 2023 Mar 7;11(3):678. doi: 10.3390/microorganisms11030678 (PMC10057677; doi:10.3390/microorganisms11030678)
Supplement: Supplementary file 1 [file microorganisms-11-00678-s001.zip › Supplementary Table 3.xlsx]

## Sheet: Supplementary Table S3
Supplementary Table S3 . General information about gene differential expression analysis from RNA-seq.
gene_id	A1	A2	A3	CK1	CK2	CK3	A1_normalized	A2_normalized	A3_normalized	ck1_normalized	ck2_normalized	ck3_normalized	baseMean	log2FoldChange	pvalue	padj	sig
Mm01G000001	76	76	42	40	42	53	66.3141	62.4259	26.9751	60.5388	46.579	63.985	54.4696	-0.138945	0.799908	0.903551	no_diff (p.adj > 0.05, -1 <= log2FC <= 1)
Mm01G000002	0	0	3	2	0	1	0	0	1.92679	3.02694	0	1.20726	1.02683	-1.08374	0.754634	NA	no diff (express=0)
Mm01G000003	2	0	1	3	3	0	1.74511	0	0.642263	4.54041	3.32707	0	1.70914	-1.72433	0.478692	NA	no diff (express=0)
Mm01G000004	108	153	62	53	29	54	94.2359	125.673	39.8203	80.2139	32.1617	65.1923	72.8829	0.550813	0.391186	0.617483	no_diff (p.adj > 0.05, -1 <= log2FC <= 1)
Mm01G000005	1202	2197	518	581	69	228	1048.81	1804.6	332.692	879.326	76.5226	275.256	736.201	1.3726	0.128246	0.305729	no_diff (p.adj > 0.05, -1 <= log2FC <= 1)
Mm01G000006	0	0	0	0	0	0	0	0	0	0	0	0	0	NA	NA	NA	no diff (express=0)
Mm01G000007	2	8	0	0	0	0	1.74511	6.57115	0	0	0	0	1.38604	3.57124	0.363704	NA	no diff (express=0)
Mm01G000008	333	322	109	113	31	39	290.561	264.489	70.0067	171.022	34.3797	47.0833	146.257	1.31155	0.106552	0.269929	no_diff (p.adj > 0.05, -1 <= log2FC <= 1)
Mm01G000009	0	0	0	0	0	0	0	0	0	0	0	0	0	NA	NA	NA	no diff (express=0)
Mm01G000010	0	0	0	0	0	0	0	0	0	0	0	0	0	NA	NA	NA	no diff (express=0)
Mm01G000011	0	0	0	0	0	0	0	0	0	0	0	0	0	NA	NA	NA	no diff (express=0)
Mm01G000012	13	15	15	2	1	12	11.3432	12.3209	9.63395	3.02694	1.10902	14.4872	8.65353	0.832244	0.482756	0.69603	no_diff (p.adj > 0.05, -1 <= log2FC <= 1)
Mm01G000013	1	0	2	0	0	2	0.872554	0	1.28453	0	0	2.41453	0.761935	-0.165179	0.964296	NA	no_diff (p.adj > 0.05, -1 <= log2FC <= 1)
Mm01G000014	0	0	0	0	0	0	0	0	0	0	0	0	0	NA	NA	NA	no diff (express=0)
Mm01G000015	148	260	0	226	0	0	129.138	213.562	0	342.044	0	0	114.124	0.00304855	0.999347	0.999754	no_diff (p.adj > 0.05, -1 <= log2FC <= 1)
Mm01G000016	6	12	0	2	0	0	5.23533	9.85672	0	3.02694	0	0	3.01983	2.37109	0.396592	NA	no diff (express=0)
Mm01G000017	479	478	0	227	2	0	417.953	392.626	0	343.558	2.21805	0	192.726	1.22947	NA	NA	no diff (express=0)
Mm01G000018	131	185	0	150	0	0	114.305	151.958	0	227.021	0	0	82.2138	0.230412	0.950709	0.977545	no_diff (p.adj > 0.05, -1 <= log2FC <= 1)
Mm01G000019	94	13	5	12	0	0	82.0201	10.6781	3.21132	18.1616	0	0	19.0119	2.41909	0.221262	0.43494	no_diff (p.adj > 0.05, -1 <= log2FC <= 1)
Mm01G000020	1878	2032	2538	1165	1508	1342	1638.66	1669.07	1630.06	1763.19	1672.41	1620.15	1665.59	-0.0338987	0.851413	0.929307	no_diff (p.adj > 0.05, -1 <= log2FC <= 1)
Mm01G000021	0	0	0	0	0	0	0	0	0	0	0	0	0	NA	NA	NA	no diff (express=0)
Mm01G000022	1	0	0	0	0	0	0.872554	0	0	0	0	0	0.145426	0.249044	0.951333	NA	no_diff (p.adj > 0.05, -1 <= log2FC <= 1)
Mm01G000023	0	0	0	0	0	0	0	0	0	0	0	0	0	NA	NA	NA	no diff (express=0)
Mm01G000024	0	0	0	0	0	0	0	0	0	0	0	0	0	NA	NA	NA	no diff (express=0)
Mm01G000025	0	0	0	0	0	0	0	0	0	0	0	0	0	NA	NA	NA	no diff (express=0)
Mm01G000026	0	0	0	0	0	0	0	0	0	0	0	0	0	NA	NA	NA	no diff (express=0)
Mm01G000027	0	0	0	0	0	0	0	0	0	0	0	0	0	NA	NA	NA	no diff (express=0)
Mm01G000028	4	0	0	3	0	6	3.49022	0	0	4.54041	0	7.24359	2.5457	-1.77144	0.540919	NA	no diff (express=0)
Mm01G000029	0	0	0	0	0	0	0	0	0	0	0	0	0	NA	NA	NA	no diff (express=0)
Mm01G000030	10	0	0	0	0	0	8.72554	0	0	0	0	0	1.45426	3.63872	0.354571	NA	no diff (express=0)
Mm01G000031	0	0	0	0	0	0	0	0	0	0	0	0	0	NA	NA	NA	no diff (express=0)
Mm01G000032	0	0	0	0	0	0	0	0	0	0	0	0	0	NA	NA	NA	no diff (express=0)
Mm01G000033	0	0	0	0	0	0	0	0	0	0	0	0	0	NA	NA	NA	no diff (express=0)
Mm01G000034	0	0	0	0	0	0	0	0	0	0	0	0	0	NA	NA	NA	no diff (express=0)
Mm01G000035	0	0	0	0	0	0	0	0	0	0	0	0	0	NA	NA	NA	no diff (express=0)
Mm01G000036	0	0	0	0	0	0	0	0	0	0	0	0	0	NA	NA	NA	no diff (express=0)
Mm01G000037	0	0	0	0	0	0	0	0	0	0	0	0	0	NA	NA	NA	no diff (express=0)
Mm01G000038	0	0	0	0	0	0	0	0	0	0	0	0	0	NA	NA	NA	no diff (express=0)
Mm01G000039	0	0	0	0	0	0	0	0	0	0	0	0	0	NA	NA	NA	no diff (express=0)
Mm01G000040	0	0	0	0	0	0	0	0	0	0	0	0	0	NA	NA	NA	no diff (express=0)
Mm01G000041	0	0	0	0	0	0	0	0	0	0	0	0	0	NA	NA	NA	no diff (express=0)
Mm01G000042	0	0	0	0	0	0	0	0	0	0	0	0	0	NA	NA	NA	no diff (express=0)
Mm01G000043	5	0	0	0	0	0	4.36277	0	0	0	0	0	0.727129	2.63437	0.505278	NA	no diff (express=0)
Mm01G000044	0	0	0	0	0	0	0	0	0	0	0	0	0	NA	NA	NA	no diff (express=0)
Mm01G000045	0	0	0	0	0	0	0	0	0	0	0	0	0	NA	NA	NA	no diff (express=0)
Mm01G000046	0	0	0	0	0	0	0	0	0	0	0	0	0	NA	NA	NA	no diff (express=0)
Mm01G000047	0	0	0	0	0	0	0	0	0	0	0	0	0	NA	NA	NA	no diff (express=0)
Mm01G000048	0	0	0	0	0	0	0	0	0	0	0	0	0	NA	NA	NA	no diff (express=0)
Mm01G000049	0	0	0	0	0	0	0	0	0	0	0	0	0	NA	NA	NA	no diff (express=0)
Mm01G000050	0	0	0	0	0	0	0	0	0	0	0	0	0	NA	NA	NA	no diff (express=0)
Mm01G000051	0	0	0	0	0	0	0	0	0	0	0	0	0	NA	NA	NA	no diff (express=0)
Mm01G000052	0	0	0	0	0	0	0	0	0	0	0	0	0	NA	NA	NA	no diff (express=0)
Mm01G000053	0	0	0	0	0	0	0	0	0	0	0	0	0	NA	NA	NA	no diff (express=0)
Mm01G000054	0	0	0	0	0	0	0	0	0	0	0	0	0	NA	NA	NA	no diff (express=0)
Mm01G000055	0	0	0	0	0	0	0	0	0	0	0	0	0	NA	NA	NA	no diff (express=0)
Mm01G000056	0	0	0	0	0	0	0	0	0	0	0	0	0	NA	NA	NA	no diff (express=0)
Mm01G000057	0	0	0	0	0	0	0	0	0	0	0	0	0	NA	NA	NA	no diff (express=0)
Mm01G000058	0	0	0	0	0	0	0	0	0	0	0	0	0	NA	NA	NA	no diff (express=0)
Mm01G000059	0	0	0	0	0	0	0	0	0	0	0	0	0	NA	NA	NA	no diff (express=0)
Mm01G000060	0	0	0	0	0	0	0	0	0	0	0	0	0	NA	NA	NA	no diff (express=0)
Mm01G000061	0	0	0	0	0	0	0	0	0	0	0	0	0	NA	NA	NA	no diff (express=0)
Mm01G000062	0	0	0	0	0	0	0	0	0	0	0	0	0	NA	NA	NA	no diff (express=0)
Mm01G000063	0	0	5	0	49	9	0	0	3.21132	0	54.3422	10.8654	11.4031	-4.30349	0.0612446	0.182749	no_diff (p.adj > 0.05, -1 <= log2FC <= 1)
Mm01G000064	0	0	0	0	0	0	0	0	0	0	0	0	0	NA	NA	NA	no diff (express=0)
Mm01G000065	0	0	0	0	0	0	0	0	0	0	0	0	0	NA	NA	NA	no diff (express=0)
Mm01G000066	0	0	0	0	0	0	0	0	0	0	0	0	0	NA	NA	NA	no diff (express=0)
Mm01G000067	0	0	0	0	0	0	0	0	0	0	0	0	0	NA	NA	NA	no diff (express=0)
Mm01G000068	1	0	0	0	0	0	0.872554	0	0	0	0	0	0.145426	0.249044	0.951333	NA	no_diff (p.adj > 0.05, -1 <= log2FC <= 1)
Mm01G000069	0	0	0	0	0	0	0	0	0	0	0	0	0	NA	NA	NA	no diff (express=0)
Mm01G000070	0	0	0	0	0	0	0	0	0	0	0	0	0	NA	NA	NA	no diff (express=0)
Mm01G000071	0	0	0	0	0	0	0	0	0	0	0	0	0	NA	NA	NA	no diff (express=0)
Mm01G000072	0	0	0	0	0	0	0	0	0	0	0	0	0	NA	NA	NA	no diff (express=0)
Mm01G000073	0	0	0	0	0	0	0	0	0	0	0	0	0	NA	NA	NA	no diff (express=0)
Mm01G000074	0	0	0	0	0	0	0	0	0	0	0	0	0	NA	NA	NA	no diff (express=0)
Mm01G000075	0	0	0	0	0	0	0	0	0	0	0	0	0	NA	NA	NA	no diff (express=0)
Mm01G000076	0	0	0	0	0	0	0	0	0	0	0	0	0	NA	NA	NA	no diff (express=0)
Mm01G000077	0	0	0	0	0	0	0	0	0	0	0	0	0	NA	NA	NA	no diff (express=0)
Mm01G000078	0	0	0	0	0	0	0	0	0	0	0	0	0	NA	NA	NA	no diff (express=0)
Mm01G000079	0	0	0	0	0	0	0	0	0	0	0	0	0	NA	NA	NA	no diff (express=0)
Mm01G000080	0	0	0	0	0	0	0	0	0	0	0	0	0	NA	NA	NA	no diff (express=0)
Mm01G000081	0	0	0	0	0	0	0	0	0	0	0	0	0	NA	NA	NA	no diff (express=0)
Mm01G000082	0	0	0	0	0	0	0	0	0	0	0	0	0	NA	NA	NA	no diff (express=0)
Mm01G000083	0	0	0	2	0	0	0	0	0	3.02694	0	0	0.50449	-2.79799	0.486379	NA	no diff (express=0)
Mm01G000084	0	0	0	0	0	0	0	0	0	0	0	0	0	NA	NA	NA	no diff (express=0)
Mm01G000085	0	0	0	0	0	0	0	0	0	0	0	0	0	NA	NA	NA	no diff (express=0)
Mm01G000086	0	0	0	0	0	0	0	0	0	0	0	0	0	NA	NA	NA	no diff (express=0)
Mm01G000087	0	0	0	0	0	0	0	0	0	0	0	0	0	NA	NA	NA	no diff (express=0)
Mm01G000088	0	0	0	0	0	0	0	0	0	0	0	0	0	NA	NA	NA	no diff (express=0)
Mm01G000089	0	0	0	0	0	0	0	0	0	0	0	0	0	NA	NA	NA	no diff (express=0)
Mm01G000090	0	0	0	0	0	0	0	0	0	0	0	0	0	NA	NA	NA	no diff (express=0)
Mm01G000091	0	0	0	0	0	0	0	0	0	0	0	0	0	NA	NA	NA	no diff (express=0)
Mm01G000092	0	0	0	0	0	0	0	0	0	0	0	0	0	NA	NA	NA	no diff (express=0)
Mm01G000093	0	0	0	0	0	0	0	0	0	0	0	0	0	NA	NA	NA	no diff (express=0)
Mm01G000094	0	0	0	0	0	0	0	0	0	0	0	0	0	NA	NA	NA	no diff (express=0)
Mm01G000095	21	6	17	0	0	0	18.3236	4.92836	10.9185	0	0	0	5.69508	5.61184	0.00396694	0.0234611	rich (p.adj < 0.05, log2FC >= 1)
Mm01G000096	0	0	0	0	0	1	0	0	0	0	0	1.20726	0.201211	-1.67451	0.681534	NA	no diff (express=0)
Mm01G000097	0	0	0	0	0	0	0	0	0	0	0	0	0	NA	NA	NA	no diff (express=0)
Mm01G000098	0	0	0	0	0	0	0	0	0	0	0	0	0	NA	NA	NA	no diff (express=0)
Mm01G000099	0	0	0	0	0	0	0	0	0	0	0	0	0	NA	NA	NA	no diff (express=0)
Mm01G000100	0	0	0	0	0	0	0	0	0	0	0	0	0	NA	NA	NA	no diff (express=0)
Mm01G000101	0	0	0	0	0	0	0	0	0	0	0	0	0	NA	NA	NA	no diff (express=0)
Mm01G000102	0	0	0	0	0	0	0	0	0	0	0	0	0	NA	NA	NA	no diff (express=0)
Mm01G000103	0	0	0	0	0	0	0	0	0	0	0	0	0	NA	NA	NA	no diff (express=0)
Mm01G000104	0	0	0	0	0	0	0	0	0	0	0	0	0	NA	NA	NA	no diff (express=0)
Mm01G000105	0	0	0	0	0	0	0	0	0	0	0	0	0	NA	NA	NA	no diff (express=0)
Mm01G000106	3	3	0	1	0	2	2.61766	2.46418	0	1.51347	0	2.41453	1.50164	0.369054	0.883828	NA	no_diff (p.adj > 0.05, -1 <= log2FC <= 1)
Mm01G000107	0	0	0	0	0	0	0	0	0	0	0	0	0	NA	NA	NA	no diff (express=0)
Mm01G000108	0	0	0	0	0	0	0	0	0	0	0	0	0	NA	NA	NA	no diff (express=0)
Mm01G000109	0	0	0	0	0	0	0	0	0	0	0	0	0	NA	NA	NA	no diff (express=0)
Mm01G000110	0	0	0	0	0	0	0	0	0	0	0	0	0	NA	NA	NA	no diff (express=0)
Mm01G000111	0	0	0	0	0	0	0	0	0	0	0	0	0	NA	NA	NA	no diff (express=0)
Mm01G000112	0	0	0	0	0	0	0	0	0	0	0	0	0	NA	NA	NA	no diff (express=0)
Mm01G000113	0	0	0	0	0	0	0	0	0	0	0	0	0	NA	NA	NA	no diff (express=0)
Mm01G000114	0	1	0	0	0	0	0	0.821393	0	0	0	0	0.136899	0.249044	0.951333	NA	no_diff (p.adj > 0.05, -1 <= log2FC <= 1)
Mm01G000115	0	0	0	0	0	0	0	0	0	0	0	0	0	NA	NA	NA	no diff (express=0)
Mm01G000116	0	0	0	0	0	0	0	0	0	0	0	0	0	NA	NA	NA	no diff (express=0)
Mm01G000117	0	0	0	0	0	0	0	0	0	0	0	0	0	NA	NA	NA	no diff (express=0)
Mm01G000118	0	0	0	0	0	0	0	0	0	0	0	0	0	NA	NA	NA	no diff (express=0)
Mm01G000119	0	0	0	0	0	0	0	0	0	0	0	0	0	NA	NA	NA	no diff (express=0)
Mm01G000120	0	0	0	0	0	0	0	0	0	0	0	0	0	NA	NA	NA	no diff (express=0)
Mm01G000121	0	0	0	0	0	0	0	0	0	0	0	0	0	NA	NA	NA	no diff (express=0)
Mm01G000122	0	0	0	0	0	0	0	0	0	0	0	0	0	NA	NA	NA	no diff (express=0)
Mm01G000123	0	0	0	0	0	0	0	0	0	0	0	0	0	NA	NA	NA	no diff (express=0)
Mm01G000124	0	0	0	0	0	0	0	0	0	0	0	0	0	NA	NA	NA	no diff (express=0)
Mm01G000125	0	0	0	0	0	0	0	0	0	0	0	0	0	NA	NA	NA	no diff (express=0)
Mm01G000126	4	2	0	0	0	0	3.49022	1.64279	0	0	0	0	0.855501	2.87154	0.466917	NA	no diff (express=0)
Mm01G000127	0	0	0	0	0	0	0	0	0	0	0	0	0	NA	NA	NA	no diff (express=0)
Mm01G000128	0	0	0	0	0	0	0	0	0	0	0	0	0	NA	NA	NA	no diff (express=0)
Mm01G000129	0	0	0	0	0	0	0	0	0	0	0	0	0	NA	NA	NA	no diff (express=0)
Mm01G000130	0	0	0	0	0	0	0	0	0	0	0	0	0	NA	NA	NA	no diff (express=0)
Mm01G000131	0	0	0	0	0	0	0	0	0	0	0	0	0	NA	NA	NA	no diff (express=0)
Mm01G000132	0	0	0	0	0	0	0	0	0	0	0	0	0	NA	NA	NA	no diff (express=0)
Mm01G000133	0	0	0	0	0	0	0	0	0	0	0	0	0	NA	NA	NA	no diff (express=0)
Mm01G000134	1	0	0	0	0	0	0.872554	0	0	0	0	0	0.145426	0.249044	0.951333	NA	no_diff (p.adj > 0.05, -1 <= log2FC <= 1)
Mm01G000135	0	0	0	0	0	1	0	0	0	0	0	1.20726	0.201211	-1.67451	0.681534	NA	no diff (express=0)
Mm01G000136	0	0	0	0	0	0	0	0	0	0	0	0	0	NA	NA	NA	no diff (express=0)
Mm01G000137	0	0	0	0	0	0	0	0	0	0	0	0	0	NA	NA	NA	no diff (express=0)
Mm01G000138	22	33	46	11	33	26	19.1962	27.106	29.5441	16.6482	36.5978	31.3889	26.7469	-0.164512	0.786245	0.896245	no_diff (p.adj > 0.05, -1 <= log2FC <= 1)
Mm01G000139	60	48	55	31	60	88	52.3533	39.4269	35.3245	46.9176	66.5414	106.239	57.8005	-0.795372	0.123915	0.298846	no_diff (p.adj > 0.05, -1 <= log2FC <= 1)
Mm01G000140	0	0	0	0	0	0	0	0	0	0	0	0	0	NA	NA	NA	no diff (express=0)
Mm01G000141	5	0	0	0	0	0	4.36277	0	0	0	0	0	0.727129	2.63437	0.505278	NA	no diff (express=0)
Mm01G000142	0	0	0	0	0	0	0	0	0	0	0	0	0	NA	NA	NA	no diff (express=0)
Mm01G000143	0	0	0	0	0	0	0	0	0	0	0	0	0	NA	NA	NA	no diff (express=0)
Mm01G000144	0	0	0	0	0	0	0	0	0	0	0	0	0	NA	NA	NA	no diff (express=0)
Mm01G000145	0	30	6	0	0	3	0	24.6418	3.85358	0	0	3.62179	5.35286	2.96082	0.253648	0.474733	no_diff (p.adj > 0.05, -1 <= log2FC <= 1)
Mm01G000146	0	0	0	0	0	0	0	0	0	0	0	0	0	NA	NA	NA	no diff (express=0)
Mm01G000147	6	5	5	3	4	5	5.23533	4.10697	3.21132	4.54041	4.43609	6.03632	4.59441	-0.267547	0.805941	0.906226	no_diff (p.adj > 0.05, -1 <= log2FC <= 1)
Mm01G000148	0	0	0	0	0	0	0	0	0	0	0	0	0	NA	NA	NA	no diff (express=0)
Mm01G000149	0	0	0	0	0	0	0	0	0	0	0	0	0	NA	NA	NA	no diff (express=0)
Mm01G000150	0	0	0	0	0	0	0	0	0	0	0	0	0	NA	NA	NA	no diff (express=0)
Mm01G000151	0	0	0	0	0	0	0	0	0	0	0	0	0	NA	NA	NA	no diff (express=0)
Mm01G000152	0	0	0	0	0	0	0	0	0	0	0	0	0	NA	NA	NA	no diff (express=0)
Mm01G000153	159	151	196	43	41	22	138.736	124.03	125.884	65.0792	45.47	26.5598	87.6265	1.51101	0.00117163	0.00892099	rich (p.adj < 0.05, log2FC >= 1)
Mm01G000154	102	61	98	19	18	14	89.0005	50.105	62.9418	28.7559	19.9624	16.9017	44.6112	1.63127	0.00227017	0.0151542	rich (p.adj < 0.05, log2FC >= 1)
Mm01G000155	59	4	61	64	124	32	51.4807	3.28557	39.1781	96.8621	137.519	38.6325	61.1596	-1.53905	0.112008	0.278943	no_diff (p.adj > 0.05, -1 <= log2FC <= 1)
Mm01G000156	197	10	154	177	370	82	171.893	8.21393	98.9086	267.884	410.339	98.9957	176.039	-1.47834	0.12786	0.305142	no_diff (p.adj > 0.05, -1 <= log2FC <= 1)
Mm01G000157	0	0	0	0	0	0	0	0	0	0	0	0	0	NA	NA	NA	no diff (express=0)
Mm01G000158	0	0	0	0	0	0	0	0	0	0	0	0	0	NA	NA	NA	no diff (express=0)
Mm01G000159	5	13	9	0	1	4	4.36277	10.6781	5.78037	0	1.10902	4.82906	4.45989	1.77935	0.243416	0.461891	no_diff (p.adj > 0.05, -1 <= log2FC <= 1)
Mm01G000160	147	128	210	41	60	55	128.265	105.138	134.875	62.0523	66.5414	66.3995	93.8787	0.916858	0.0063844	0.0342448	no_diff (p.adj > 0.05, -1 <= log2FC <= 1)
Mm01G000161	0	0	0	0	0	0	0	0	0	0	0	0	0	NA	NA	NA	no diff (express=0)
Mm01G000162	0	0	0	0	0	0	0	0	0	0	0	0	0	NA	NA	NA	no diff (express=0)
Mm01G000163	0	0	0	0	0	0	0	0	0	0	0	0	0	NA	NA	NA	no diff (express=0)
Mm01G000164	0	0	0	0	0	0	0	0	0	0	0	0	0	NA	NA	NA	no diff (express=0)
Mm01G000165	0	0	0	0	0	0	0	0	0	0	0	0	0	NA	NA	NA	no diff (express=0)
Mm01G000166	0	0	0	3	0	0	0	0	0	4.54041	0	0	0.756735	-3.39248	0.39423	NA	no diff (express=0)
Mm01G000167	97	149	202	136	326	278	84.6378	122.388	129.737	205.832	361.542	335.619	206.626	-1.42313	0.000316332	0.00308247	down (p.adj < 0.05, log2FC <= -1)
Mm01G000168	0	0	0	0	0	0	0	0	0	0	0	0	0	NA	NA	NA	no diff (express=0)
Mm01G000169	0	0	0	0	0	0	0	0	0	0	0	0	0	NA	NA	NA	no diff (express=0)
Mm01G000170	0	0	0	0	0	0	0	0	0	0	0	0	0	NA	NA	NA	no diff (express=0)
Mm01G000171	0	0	0	0	0	0	0	0	0	0	0	0	0	NA	NA	NA	no diff (express=0)
Mm01G000172	54	46	113	41	92	58	47.1179	37.7841	72.5758	62.0523	102.03	70.0213	65.2636	-0.571338	0.245157	0.46382	no_diff (p.adj > 0.05, -1 <= log2FC <= 1)
Mm01G000173	0	0	0	0	0	0	0	0	0	0	0	0	0	NA	NA	NA	no diff (express=0)
Mm01G000174	6	12	7	3	0	13	5.23533	9.85672	4.49584	4.54041	0	15.6944	6.63712	-0.0488985	0.974361	0.987625	no_diff (p.adj > 0.05, -1 <= log2FC <= 1)
Mm01G000175	0	0	0	0	0	0	0	0	0	0	0	0	0	NA	NA	NA	no diff (express=0)
Mm01G000176	964	1147	1414	559	730	654	841.142	942.138	908.16	846.03	809.587	789.551	856.101	0.138799	0.484409	0.697501	no_diff (p.adj > 0.05, -1 <= log2FC <= 1)
Mm01G000177	0	0	0	0	0	0	0	0	0	0	0	0	0	NA	NA	NA	no diff (express=0)
Mm01G000178	0	0	0	0	0	0	0	0	0	0	0	0	0	NA	NA	NA	no diff (express=0)
Mm01G000179	44	15	76	105	59	0	38.3924	12.3209	48.812	158.914	65.4324	0	53.9787	-1.17025	0.411075	0.635227	no_diff (p.adj > 0.05, -1 <= log2FC <= 1)
Mm01G000180	171	159	251	310	354	63	149.207	130.602	161.208	469.176	392.594	76.0576	229.807	-1.08771	0.104957	0.267438	no_diff (p.adj > 0.05, -1 <= log2FC <= 1)
Mm01G000181	0	0	0	0	0	0	0	0	0	0	0	0	0	NA	NA	NA	no diff (express=0)
Mm01G000182	13	8	11	6	4	5	11.3432	6.57115	7.0649	9.08082	4.43609	6.03632	7.42208	0.365006	0.697884	0.846786	no_diff (p.adj > 0.05, -1 <= log2FC <= 1)
Mm01G000183	0	0	0	0	0	0	0	0	0	0	0	0	0	NA	NA	NA	no diff (express=0)
Mm01G000184	0	0	0	0	0	0	0	0	0	0	0	0	0	NA	NA	NA	no diff (express=0)
Mm01G000185	0	0	0	0	0	0	0	0	0	0	0	0	0	NA	NA	NA	no diff (express=0)
Mm01G000186	0	0	0	0	0	0	0	0	0	0	0	0	0	NA	NA	NA	no diff (express=0)
Mm01G000187	12	3	30	58	53	0	10.4707	2.46418	19.2679	87.7813	58.7783	0	29.7937	-2.18096	0.147256	0.334235	no_diff (p.adj > 0.05, -1 <= log2FC <= 1)
Mm01G000188	0	0	0	0	0	0	0	0	0	0	0	0	0	NA	NA	NA	no diff (express=0)
Mm01G000189	0	0	0	0	0	0	0	0	0	0	0	0	0	NA	NA	NA	no diff (express=0)
Mm01G000190	29	12	16	7	2	18	25.3041	9.85672	10.2762	10.5943	2.21805	21.7308	13.33	0.394577	0.710697	0.85518	no_diff (p.adj > 0.05, -1 <= log2FC <= 1)
Mm01G000191	0	0	0	0	0	0	0	0	0	0	0	0	0	NA	NA	NA	no diff (express=0)
Mm01G000192	0	0	0	0	0	0	0	0	0	0	0	0	0	NA	NA	NA	no diff (express=0)
Mm01G000193	0	0	0	0	0	0	0	0	0	0	0	0	0	NA	NA	NA	no diff (express=0)
Mm01G000194	0	0	0	0	0	0	0	0	0	0	0	0	0	NA	NA	NA	no diff (express=0)
Mm01G000195	0	0	0	0	0	0	0	0	0	0	0	0	0	NA	NA	NA	no diff (express=0)
Mm01G000196	0	0	0	0	0	0	0	0	0	0	0	0	0	NA	NA	NA	no diff (express=0)
Mm01G000197	0	0	0	0	0	0	0	0	0	0	0	0	0	NA	NA	NA	no diff (express=0)
Mm01G000198	0	0	0	0	0	0	0	0	0	0	0	0	0	NA	NA	NA	no diff (express=0)
Mm01G000199	0	0	0	0	0	0	0	0	0	0	0	0	0	NA	NA	NA	no diff (express=0)
Mm01G000200	1	0	0	15	9	0	0.872554	0	0	22.7021	9.98121	0	5.59264	-5.29502	0.030328	0.110519	no_diff (p.adj > 0.05, -1 <= log2FC <= 1)
Mm01G000201	0	0	0	0	0	0	0	0	0	0	0	0	0	NA	NA	NA	no diff (express=0)
Mm01G000202	13	3	2	4	10	2	11.3432	2.46418	1.28453	6.05388	11.0902	2.41453	5.77509	-0.393643	0.772378	0.889191	no_diff (p.adj > 0.05, -1 <= log2FC <= 1)
Mm01G000203	1029	1209	1257	1066	2495	1664	897.858	993.064	807.325	1613.36	2767.01	2008.89	1514.58	-1.24409	8.19046e-05	0.00103485	down (p.adj < 0.05, log2FC <= -1)
Mm01G000204	107	122	244	125	162	166	93.3633	100.21	156.712	189.184	179.662	200.406	153.256	-0.697318	0.0551718	0.169609	no_diff (p.adj > 0.05, -1 <= log2FC <= 1)
Mm01G000205	425	469	583	220	258	199	370.836	385.233	374.44	332.963	286.128	240.246	331.641	0.397284	0.131716	0.311109	no_diff (p.adj > 0.05, -1 <= log2FC <= 1)
Mm01G000206	0	0	0	0	0	0	0	0	0	0	0	0	0	NA	NA	NA	no diff (express=0)
Mm01G000207	0	0	0	0	0	0	0	0	0	0	0	0	0	NA	NA	NA	no diff (express=0)
Mm01G000208	275	328	267	108	215	227	239.952	269.417	171.484	163.455	238.44	274.049	226.133	0.00762831	0.983867	0.992328	no_diff (p.adj > 0.05, -1 <= log2FC <= 1)
Mm01G000209	219	250	348	208	422	275	191.089	205.348	223.508	314.802	468.008	331.998	289.125	-0.847328	0.00571941	0.0314344	no_diff (p.adj > 0.05, -1 <= log2FC <= 1)
Mm01G000210	0	0	0	0	0	0	0	0	0	0	0	0	0	NA	NA	NA	no diff (express=0)
Mm01G000211	946	754	944	351	323	277	825.436	619.331	606.297	531.228	358.215	334.412	545.82	0.746171	0.0258124	0.098497	no_diff (p.adj > 0.05, -1 <= log2FC <= 1)
Mm01G000212	2813	2916	2866	189	313	421	2454.49	2395.18	1840.73	286.046	347.124	508.258	1305.31	2.55017	8.08828e-14	9.36021e-12	rich (p.adj < 0.05, log2FC >= 1)
Mm01G000213	0	9	2	17	0	0	0	7.39254	1.28453	25.729	0	0	5.73434	-1.5623	0.574681	0.766065	no_diff (p.adj > 0.05, -1 <= log2FC <= 1)
Mm01G000214	121	207	190	161	409	615	105.579	170.028	122.03	243.669	453.591	742.467	306.227	-1.85712	0.000283924	0.00282885	down (p.adj < 0.05, log2FC <= -1)
Mm01G000215	122	104	51	22	16	60	106.452	85.4249	32.7554	33.2963	17.7444	72.4359	58.0181	0.861325	0.254253	0.475457	no_diff (p.adj > 0.05, -1 <= log2FC <= 1)
Mm01G000216	1098	1314	1669	731	1481	1357	958.065	1079.31	1071.94	1106.35	1642.46	1638.26	1249.4	-0.497079	0.0767502	0.215263	no_diff (p.adj > 0.05, -1 <= log2FC <= 1)
Mm01G000217	89	75	183	76	92	81	77.6573	61.6045	117.534	115.024	102.03	97.7884	95.2731	-0.289628	0.48899	0.701116	no_diff (p.adj > 0.05, -1 <= log2FC <= 1)
Mm01G000218	301	325	463	183	130	69	262.639	266.953	297.368	276.965	144.173	83.3012	221.9	0.716421	0.164226	0.359728	no_diff (p.adj > 0.05, -1 <= log2FC <= 1)
Mm01G000219	150	99	215	83	83	59	130.883	81.3179	138.087	125.618	92.049	71.2286	106.531	0.282184	0.521475	0.727278	no_diff (p.adj > 0.05, -1 <= log2FC <= 1)
Mm01G000220	0	0	0	0	0	0	0	0	0	0	0	0	0	NA	NA	NA	no diff (express=0)
Mm01G000221	174	270	341	56	117	60	151.824	221.776	219.012	84.7543	129.756	72.4359	146.593	1.04416	0.0107154	0.0507884	no_diff (p.adj > 0.05, -1 <= log2FC <= 1)
Mm01G000222	24	29	13	6	0	0	20.9413	23.8204	8.34942	9.08082	0	0	10.3653	2.59874	0.12331	0.297764	no_diff (p.adj > 0.05, -1 <= log2FC <= 1)
Mm01G000223	67	71	276	133	429	476	58.4611	58.3189	177.265	201.292	475.771	574.658	257.628	-2.0878	0.00128027	0.00957511	down (p.adj < 0.05, log2FC <= -1)
Mm01G000224	35	70	72	80	164	176	30.5394	57.4975	46.243	121.078	181.88	212.479	108.286	-1.94088	1.83916e-05	0.000290819	down (p.adj < 0.05, log2FC <= -1)
Mm01G000225	49	53	135	52	137	123	42.7552	43.5338	86.7055	78.7004	151.936	148.493	92.0208	-1.13028	0.0328994	0.117196	no_diff (p.adj > 0.05, -1 <= log2FC <= 1)
Mm01G000226	3	2	0	0	0	0	2.61766	1.64279	0	0	0	0	0.710075	2.60184	0.510665	NA	no diff (express=0)
Mm01G000227	10	3	19	12	3	3	8.72554	2.46418	12.203	18.1616	3.32707	3.62179	8.08387	-0.0745958	0.951286	0.977736	no_diff (p.adj > 0.05, -1 <= log2FC <= 1)
Mm01G000228	240	249	366	244	461	327	209.413	204.527	235.068	369.287	511.26	394.775	320.722	-0.975082	0.000509225	0.00456385	no_diff (p.adj > 0.05, -1 <= log2FC <= 1)
Mm01G000229	0	0	0	0	0	0	0	0	0	0	0	0	0	NA	NA	NA	no diff (express=0)
Mm01G000230	202	310	365	110	148	205	176.256	254.632	234.426	166.482	164.135	247.489	207.237	0.202489	0.569604	0.762126	no_diff (p.adj > 0.05, -1 <= log2FC <= 1)
Mm01G000231	155	143	216	22	30	21	135.246	117.459	138.729	33.2963	33.2707	25.3525	80.5589	2.09282	4.47595e-08	1.54438e-06	rich (p.adj < 0.05, log2FC >= 1)
Mm01G000232	88	105	158	32	48	61	76.7848	86.2463	101.478	48.431	53.2331	73.6431	73.3027	0.592283	0.139258	0.322087	no_diff (p.adj > 0.05, -1 <= log2FC <= 1)
Mm01G000233	4	2	2	0	3	1	3.49022	1.64279	1.28453	0	3.32707	1.20726	1.82531	0.446568	0.814861	NA	no_diff (p.adj > 0.05, -1 <= log2FC <= 1)
Mm01G000234	1	0	2	2	0	0	0.872554	0	1.28453	3.02694	0	0	0.864004	-0.442993	0.902565	NA	no_diff (p.adj > 0.05, -1 <= log2FC <= 1)
Mm01G000235	579	481	846	314	644	518	505.209	395.09	543.355	475.23	714.211	625.363	543.076	-0.330747	0.283559	0.509389	no_diff (p.adj > 0.05, -1 <= log2FC <= 1)
Mm01G000236	0	0	0	0	0	0	0	0	0	0	0	0	0	NA	NA	NA	no diff (express=0)
Mm01G000237	81	68	76	24	18	44	70.6769	55.8547	48.812	36.3233	19.9624	53.1196	47.4582	0.681437	0.22472	0.439562	no_diff (p.adj > 0.05, -1 <= log2FC <= 1)
Mm01G000238	0	0	0	0	0	0	0	0	0	0	0	0	0	NA	NA	NA	no diff (express=0)
Mm01G000239	3	0	0	0	8	0	2.61766	0	0	0	8.87219	0	1.91498	-1.78321	0.642962	NA	no diff (express=0)
Mm01G000240	3445	1431	6730	738	2736	342	3005.95	1175.41	4322.43	1116.94	3034.29	412.884	2177.98	0.89768	0.246524	0.465396	no_diff (p.adj > 0.05, -1 <= log2FC <= 1)
Mm01G000241	0	0	0	0	0	0	0	0	0	0	0	0	0	NA	NA	NA	no diff (express=0)
Mm01G000242	0	0	4	0	0	0	0	0	2.56905	0	0	0	0.428176	1.90008	0.633537	NA	no diff (express=0)
Mm01G000243	233	119	87	19	70	62	203.305	97.7458	55.8769	28.7559	77.6317	74.8504	89.6943	0.971824	0.155421	0.347247	no_diff (p.adj > 0.05, -1 <= log2FC <= 1)
Mm01G000244	43	34	42	3	41	61	37.5198	27.9274	26.9751	4.54041	45.47	73.6431	36.0126	-0.425937	0.649727	0.816891	no_diff (p.adj > 0.05, -1 <= log2FC <= 1)
Mm01G000245	7	4	8	0	5	1	6.10788	3.28557	5.13811	0	5.54512	1.20726	3.54732	1.06096	0.507327	NA	no diff (express=0)
Mm01G000246	110	51	55	7	56	34	95.981	41.8911	35.3245	10.5943	62.1053	41.047	47.8239	0.59728	0.458724	0.675609	no_diff (p.adj > 0.05, -1 <= log2FC <= 1)
Mm01G000247	0	0	3	0	0	0	0	0	1.92679	0	0	0	0.321132	1.49114	0.71006	NA	no diff (express=0)
Mm01G000248	0	0	0	0	0	0	0	0	0	0	0	0	0	NA	NA	NA	no diff (express=0)
Mm01G000249	96	141	210	72	87	61	83.7652	115.816	134.875	108.97	96.4851	73.6431	102.259	0.265152	0.503699	0.712664	no_diff (p.adj > 0.05, -1 <= log2FC <= 1)
Mm01G000250	208	158	153	163	212	256	181.491	129.78	98.2663	246.696	235.113	309.06	200.068	-0.95189	0.0118314	0.0547196	no_diff (p.adj > 0.05, -1 <= log2FC <= 1)
Mm01G000251	7	8	10	19	8	11	6.10788	6.57115	6.42263	28.7559	8.87219	13.2799	11.6683	-1.39942	0.105844	0.268865	no_diff (p.adj > 0.05, -1 <= log2FC <= 1)
Mm01G000252	28	18	21	23	10	0	24.4315	14.7851	13.4875	34.8098	11.0902	0	16.434	0.207959	0.877805	0.94329	no_diff (p.adj > 0.05, -1 <= log2FC <= 1)
Mm01G000253	191	267	393	145	236	147	166.658	219.312	252.409	219.453	261.73	177.468	216.172	-0.0443945	0.897419	0.952638	no_diff (p.adj > 0.05, -1 <= log2FC <= 1)
Mm01G000254	0	0	0	0	0	0	0	0	0	0	0	0	0	NA	NA	NA	no diff (express=0)
Mm01G000255	355	380	271	324	537	557	309.757	312.129	174.053	490.364	595.546	672.446	425.716	-1.14523	0.00187853	0.0129736	down (p.adj < 0.05, log2FC <= -1)
Mm01G000256	180	197	272	79	110	69	157.06	161.814	174.696	119.564	121.993	83.3012	136.405	0.604984	0.0658348	0.192935	no_diff (p.adj > 0.05, -1 <= log2FC <= 1)
Mm01G000257	105	110	186	77	165	173	91.6182	90.3533	119.461	116.537	182.989	208.857	134.969	-0.755042	0.0543521	0.167731	no_diff (p.adj > 0.05, -1 <= log2FC <= 1)
Mm01G000258	0	1	0	0	0	0	0	0.821393	0	0	0	0	0.136899	0.249044	0.951333	NA	no_diff (p.adj > 0.05, -1 <= log2FC <= 1)
Mm01G000259	4365	3907	4841	1682	2768	2121	3808.7	3209.18	3109.2	2545.66	3069.78	2560.61	3050.52	0.308518	0.181291	0.38377	no_diff (p.adj > 0.05, -1 <= log2FC <= 1)
Mm01G000260	44	0	43	14	0	29	38.3924	0	27.6173	21.1886	0	35.0107	20.3682	0.233532	0.903229	0.955625	no_diff (p.adj > 0.05, -1 <= log2FC <= 1)
Mm01G000261	0	0	0	0	0	0	0	0	0	0	0	0	0	NA	NA	NA	no diff (express=0)
Mm01G000262	339	273	357	125	196	147	295.796	224.24	229.288	189.184	217.369	177.468	222.224	0.35802	0.222436	0.436461	no_diff (p.adj > 0.05, -1 <= log2FC <= 1)
Mm01G000263	141	170	215	66	109	90	123.03	139.637	138.087	99.889	120.884	108.654	121.697	0.280932	0.347563	0.575291	no_diff (p.adj > 0.05, -1 <= log2FC <= 1)
Mm01G000264	0	0	0	0	0	0	0	0	0	0	0	0	0	NA	NA	NA	no diff (express=0)
Mm01G000265	68	117	162	463	78	163	59.3337	96.103	104.047	700.737	86.5038	196.784	207.251	-1.92095	0.0133637	0.059992	no_diff (p.adj > 0.05, -1 <= log2FC <= 1)
Mm01G000266	231	189	284	102	188	190	201.56	155.243	182.403	154.374	208.496	229.38	188.576	-0.137758	0.671079	0.829344	no_diff (p.adj > 0.05, -1 <= log2FC <= 1)
Mm01G000267	0	0	0	0	0	0	0	0	0	0	0	0	0	NA	NA	NA	no diff (express=0)
Mm01G000268	0	0	0	0	0	0	0	0	0	0	0	0	0	NA	NA	NA	no diff (express=0)
Mm01G000269	0	0	0	0	0	0	0	0	0	0	0	0	0	NA	NA	NA	no diff (express=0)
Mm01G000270	10	10	14	8	8	7	8.72554	8.21393	8.99169	12.1078	8.87219	8.45085	9.22699	-0.173649	0.828064	0.917196	no_diff (p.adj > 0.05, -1 <= log2FC <= 1)
Mm01G000271	0	0	0	0	0	0	0	0	0	0	0	0	0	NA	NA	NA	no diff (express=0)
Mm01G000272	0	0	0	0	0	0	0	0	0	0	0	0	0	NA	NA	NA	no diff (express=0)
Mm01G000273	0	0	3	0	0	0	0	0	1.92679	0	0	0	0.321132	1.49114	0.71006	NA	no diff (express=0)
Mm01G000274	84	63	115	16	15	24	73.2946	51.7478	73.8603	24.2155	16.6354	28.9743	44.788	1.51514	0.00258915	0.0167792	rich (p.adj < 0.05, log2FC >= 1)
Mm01G000275	3	7	11	8	0	0	2.61766	5.74975	7.0649	12.1078	0	0	4.59001	0.379754	0.855246	0.931423	no_diff (p.adj > 0.05, -1 <= log2FC <= 1)
Mm01G000276	48	120	76	30	2	1	41.8826	98.5672	48.812	45.4041	2.21805	1.20726	39.6819	1.97043	0.118099	0.288967	no_diff (p.adj > 0.05, -1 <= log2FC <= 1)
Mm01G000277	2	0	0	0	0	0	1.74511	0	0	0	0	0	0.290851	1.30041	0.746652	NA	no diff (express=0)
Mm01G000278	0	0	0	0	0	0	0	0	0	0	0	0	0	NA	NA	NA	no diff (express=0)
Mm01G000279	0	0	0	0	0	0	0	0	0	0	0	0	0	NA	NA	NA	no diff (express=0)
Mm01G000280	953	1382	1712	752	1303	1339	831.544	1135.17	1099.55	1138.13	1445.06	1616.53	1211	-0.453972	0.115932	0.285493	no_diff (p.adj > 0.05, -1 <= log2FC <= 1)
Mm01G000281	49	89	130	48	50	44	42.7552	73.104	83.4942	72.6466	55.4512	53.1196	63.4285	0.143929	0.760506	0.882639	no_diff (p.adj > 0.05, -1 <= log2FC <= 1)
Mm01G000282	3021	3916	4686	1428	2545	2260	2635.99	3216.58	3009.65	2161.24	2822.47	2728.42	2762.39	0.200319	0.410476	0.634678	no_diff (p.adj > 0.05, -1 <= log2FC <= 1)
Mm01G000283	129	91	170	69	105	77	112.559	74.7468	109.185	104.429	116.447	92.9593	101.721	-0.0819613	0.823177	0.914121	no_diff (p.adj > 0.05, -1 <= log2FC <= 1)
Mm01G000284	0	0	0	0	0	0	0	0	0	0	0	0	0	NA	NA	NA	no diff (express=0)
Mm01G000285	0	0	0	0	0	0	0	0	0	0	0	0	0	NA	NA	NA	no diff (express=0)
Mm01G000286	206	282	271	163	244	288	179.746	231.633	174.053	246.696	270.602	347.692	241.737	-0.56459	0.0733194	0.20805	no_diff (p.adj > 0.05, -1 <= log2FC <= 1)
Mm01G000287	0	0	0	0	0	0	0	0	0	0	0	0	0	NA	NA	NA	no diff (express=0)
Mm01G000288	0	0	0	0	0	0	0	0	0	0	0	0	0	NA	NA	NA	no diff (express=0)
Mm01G000289	0	0	0	0	0	0	0	0	0	0	0	0	0	NA	NA	NA	no diff (express=0)
Mm01G000290	12	7	30	6	0	0	10.4707	5.74975	19.2679	9.08082	0	0	7.42819	2.01385	0.269111	0.492604	no_diff (p.adj > 0.05, -1 <= log2FC <= 1)
Mm01G000291	2	0	1	3	0	0	1.74511	0	0.642263	4.54041	0	0	1.15463	-0.906876	0.791847	NA	no_diff (p.adj > 0.05, -1 <= log2FC <= 1)
Mm01G000292	0	5	0	1	3	5	0	4.10697	0	1.51347	3.32707	6.03632	2.4973	-1.42294	0.537779	NA	no diff (express=0)
Mm01G000293	0	2	0	0	0	0	0	1.64279	0	0	0	0	0.273798	1.22398	0.76144	NA	no diff (express=0)
Mm01G000294	568	660	1043	364	952	676	495.611	542.12	669.881	550.903	1055.79	816.111	688.403	-0.50516	0.161277	0.355383	no_diff (p.adj > 0.05, -1 <= log2FC <= 1)
Mm01G000295	0	0	0	0	0	0	0	0	0	0	0	0	0	NA	NA	NA	no diff (express=0)
Mm01G000296	0	0	0	46	207	842	0	0	0	69.6196	229.568	1016.52	219.284	-11.5927	3.349e-13	3.28051e-11	down (p.adj < 0.05, log2FC <= -1)
Mm01G000297	0	0	0	0	0	0	0	0	0	0	0	0	0	NA	NA	NA	no diff (express=0)
Mm01G000298	0	0	0	0	0	0	0	0	0	0	0	0	0	NA	NA	NA	no diff (express=0)
Mm01G000299	0	0	0	0	0	0	0	0	0	0	0	0	0	NA	NA	NA	no diff (express=0)
Mm01G000300	15	13	0	8	2	5	13.0883	10.6781	0	12.1078	2.21805	6.03632	7.35476	0.2272	0.888988	0.948778	no_diff (p.adj > 0.05, -1 <= log2FC <= 1)
Mm01G000301	0	0	0	0	0	0	0	0	0	0	0	0	0	NA	NA	NA	no diff (express=0)
Mm01G000302	0	0	0	0	0	0	0	0	0	0	0	0	0	NA	NA	NA	no diff (express=0)
Mm01G000303	0	0	0	0	0	0	0	0	0	0	0	0	0	NA	NA	NA	no diff (express=0)
Mm01G000304	0	0	0	1	0	1	0	0	0	1.51347	0	1.20726	0.453456	-2.66056	0.50921	NA	no diff (express=0)
Mm01G000305	0	0	0	0	0	0	0	0	0	0	0	0	0	NA	NA	NA	no diff (express=0)
Mm01G000306	0	0	0	0	0	0	0	0	0	0	0	0	0	NA	NA	NA	no diff (express=0)
Mm01G000307	0	0	0	0	0	0	0	0	0	0	0	0	0	NA	NA	NA	no diff (express=0)
Mm01G000308	0	0	0	0	0	0	0	0	0	0	0	0	0	NA	NA	NA	no diff (express=0)
Mm01G000309	0	0	0	0	0	0	0	0	0	0	0	0	0	NA	NA	NA	no diff (express=0)
Mm01G000310	0	0	0	0	0	0	0	0	0	0	0	0	0	NA	NA	NA	no diff (express=0)
Mm01G000311	0	0	0	0	0	0	0	0	0	0	0	0	0	NA	NA	NA	no diff (express=0)
Mm01G000312	0	0	0	0	0	0	0	0	0	0	0	0	0	NA	NA	NA	no diff (express=0)
Mm01G000313	5	6	13	26	26	17	4.36277	4.92836	8.34942	39.3502	28.8346	20.5235	17.7248	-2.30866	0.00172759	0.0121233	down (p.adj < 0.05, log2FC <= -1)
Mm01G000314	0	0	0	0	0	0	0	0	0	0	0	0	0	NA	NA	NA	no diff (express=0)
Mm01G000315	0	0	0	0	0	2	0	0	0	0	0	2.41453	0.402421	-2.51275	0.534352	NA	no diff (express=0)
Mm01G000316	133	97	105	62	65	110	116.05	79.6751	67.4376	93.8351	72.0865	132.799	93.6472	-0.184663	0.686747	0.838837	no_diff (p.adj > 0.05, -1 <= log2FC <= 1)
Mm01G000317	0	0	0	0	0	0	0	0	0	0	0	0	0	NA	NA	NA	no diff (express=0)
Mm01G000318	0	0	0	0	0	0	0	0	0	0	0	0	0	NA	NA	NA	no diff (express=0)
Mm01G000319	0	0	0	0	0	0	0	0	0	0	0	0	0	NA	NA	NA	no diff (express=0)
Mm01G000320	0	0	0	0	0	0	0	0	0	0	0	0	0	NA	NA	NA	no diff (express=0)
Mm01G000321	1440	3426	478	65	133	1178	1256.48	2814.09	307.002	98.3756	147.5	1422.16	1007.6	1.39175	0.195872	0.403563	no_diff (p.adj > 0.05, -1 <= log2FC <= 1)
Mm01G000322	1032	1158	1595	214	450	331	900.476	951.173	1024.41	323.883	499.061	399.604	683.101	1.23264	1.31572e-05	0.000216969	rich (p.adj < 0.05, log2FC >= 1)
Mm01G000323	0	2	0	0	0	0	0	1.64279	0	0	0	0	0.273798	1.22398	0.76144	NA	no diff (express=0)
Mm01G000324	231	266	237	76	119	136	201.56	218.491	152.216	115.024	131.974	164.188	163.909	0.473904	0.167574	0.364741	no_diff (p.adj > 0.05, -1 <= log2FC <= 1)
Mm01G000325	0	0	0	0	0	0	0	0	0	0	0	0	0	NA	NA	NA	no diff (express=0)
Mm01G000326	0	0	0	0	0	0	0	0	0	0	0	0	0	NA	NA	NA	no diff (express=0)
Mm01G000327	0	23	29	24	0	0	0	18.892	18.6256	36.3233	0	0	12.3068	0.0538143	0.983207	0.99188	no_diff (p.adj > 0.05, -1 <= log2FC <= 1)
Mm01G000328	345	421	543	161	436	455	301.031	345.807	348.749	243.669	483.534	549.305	378.682	-0.359774	0.376047	0.604392	no_diff (p.adj > 0.05, -1 <= log2FC <= 1)
Mm01G000329	22	24	19	9	0	0	19.1962	19.7134	12.203	13.6212	0	0	10.789	1.9405	0.264721	0.487777	no_diff (p.adj > 0.05, -1 <= log2FC <= 1)
Mm01G000330	0	0	0	0	0	0	0	0	0	0	0	0	0	NA	NA	NA	no diff (express=0)
Mm01G000331	0	0	0	0	0	0	0	0	0	0	0	0	0	NA	NA	NA	no diff (express=0)
Mm01G000332	0	0	0	0	0	0	0	0	0	0	0	0	0	NA	NA	NA	no diff (express=0)
Mm01G000333	0	0	0	0	0	0	0	0	0	0	0	0	0	NA	NA	NA	no diff (express=0)
Mm01G000334	3618	3269	4702	1340	3219	2672	3156.9	2685.13	3019.92	2028.05	3569.95	3225.81	2947.63	0.00596921	0.985116	0.992833	no_diff (p.adj > 0.05, -1 <= log2FC <= 1)
Mm01G000335	0	0	0	0	0	0	0	0	0	0	0	0	0	NA	NA	NA	no diff (express=0)
Mm01G000336	0	0	0	0	0	0	0	0	0	0	0	0	0	NA	NA	NA	no diff (express=0)
Mm01G000337	0	0	0	0	0	0	0	0	0	0	0	0	0	NA	NA	NA	no diff (express=0)
Mm01G000338	175	165	263	158	284	197	152.697	135.53	168.915	239.128	314.963	237.831	208.177	-0.793112	0.00814913	0.0412887	no_diff (p.adj > 0.05, -1 <= log2FC <= 1)
Mm01G000339	0	0	0	0	0	0	0	0	0	0	0	0	0	NA	NA	NA	no diff (express=0)
Mm01G000340	0	0	0	0	0	0	0	0	0	0	0	0	0	NA	NA	NA	no diff (express=0)
Mm01G000341	0	0	0	0	0	0	0	0	0	0	0	0	0	NA	NA	NA	no diff (express=0)
Mm01G000342	0	0	0	0	0	0	0	0	0	0	0	0	0	NA	NA	NA	no diff (express=0)
Mm01G000343	0	0	0	0	0	0	0	0	0	0	0	0	0	NA	NA	NA	no diff (express=0)
Mm01G000344	0	0	0	0	0	0	0	0	0	0	0	0	0	NA	NA	NA	no diff (express=0)
Mm01G000345	0	0	0	0	0	0	0	0	0	0	0	0	0	NA	NA	NA	no diff (express=0)
Mm01G000346	0	0	0	0	0	0	0	0	0	0	0	0	0	NA	NA	NA	no diff (express=0)
Mm01G000347	0	0	0	0	0	0	0	0	0	0	0	0	0	NA	NA	NA	no diff (express=0)
Mm01G000348	0	0	0	0	0	0	0	0	0	0	0	0	0	NA	NA	NA	no diff (express=0)
Mm01G000349	0	0	0	0	0	0	0	0	0	0	0	0	0	NA	NA	NA	no diff (express=0)
Mm01G000350	0	0	0	0	0	0	0	0	0	0	0	0	0	NA	NA	NA	no diff (express=0)
Mm01G000351	0	0	0	0	0	0	0	0	0	0	0	0	0	NA	NA	NA	no diff (express=0)
Mm01G000352	0	0	0	4	0	0	0	0	0	6.05388	0	0	1.00898	-3.81253	0.336046	NA	no diff (express=0)
Mm01G000353	0	0	0	0	0	0	0	0	0	0	0	0	0	NA	NA	NA	no diff (express=0)
Mm01G000354	650	1330	3378	2610	4938	6652	567.16	1092.45	2169.57	3950.16	5476.36	8030.72	3547.74	-2.1885	0.000120356	0.00141728	down (p.adj < 0.05, log2FC <= -1)
Mm01G000355	0	0	0	0	0	0	0	0	0	0	0	0	0	NA	NA	NA	no diff (express=0)
Mm01G000356	0	0	0	0	0	0	0	0	0	0	0	0	0	NA	NA	NA	no diff (express=0)
Mm01G000357	0	0	0	0	0	0	0	0	0	0	0	0	0	NA	NA	NA	no diff (express=0)
Mm01G000358	0	0	0	0	0	0	0	0	0	0	0	0	0	NA	NA	NA	no diff (express=0)
Mm01G000359	0	0	0	0	0	0	0	0	0	0	0	0	0	NA	NA	NA	no diff (express=0)
Mm01G000360	0	0	0	0	0	0	0	0	0	0	0	0	0	NA	NA	NA	no diff (express=0)
Mm01G000361	0	0	0	0	0	0	0	0	0	0	0	0	0	NA	NA	NA	no diff (express=0)
Mm01G000362	1048	1088	1487	814	1662	1526	914.437	893.676	955.046	1231.96	1843.2	1842.29	1280.1	-0.831986	0.00291494	0.0184549	no_diff (p.adj > 0.05, -1 <= log2FC <= 1)
Mm01G000363	0	0	0	0	0	0	0	0	0	0	0	0	0	NA	NA	NA	no diff (express=0)
Mm01G000364	0	0	0	0	0	0	0	0	0	0	0	0	0	NA	NA	NA	no diff (express=0)
Mm01G000365	0	0	0	0	0	0	0	0	0	0	0	0	0	NA	NA	NA	no diff (express=0)
Mm01G000366	0	0	0	0	0	0	0	0	0	0	0	0	0	NA	NA	NA	no diff (express=0)
Mm01G000367	0	0	0	0	0	0	0	0	0	0	0	0	0	NA	NA	NA	no diff (express=0)
Mm01G000368	0	0	0	0	0	0	0	0	0	0	0	0	0	NA	NA	NA	no diff (express=0)
Mm01G000369	0	0	3	0	0	0	0	0	1.92679	0	0	0	0.321132	1.49114	0.71006	NA	no diff (express=0)
Mm01G000370	15	39	98	22	10	3	13.0883	32.0343	62.9418	33.2963	11.0902	3.62179	26.0121	1.18742	0.246707	0.465639	no_diff (p.adj > 0.05, -1 <= log2FC <= 1)
Mm01G000371	0	0	0	0	0	0	0	0	0	0	0	0	0	NA	NA	NA	no diff (express=0)
Mm01G000372	0	0	0	0	0	0	0	0	0	0	0	0	0	NA	NA	NA	no diff (express=0)
Mm01G000373	23	67	172	35	15	6	20.0687	55.0334	110.469	52.9715	16.6354	7.24359	43.737	1.28388	0.18188	0.384488	no_diff (p.adj > 0.05, -1 <= log2FC <= 1)
Mm01G000374	0	0	0	0	0	0	0	0	0	0	0	0	0	NA	NA	NA	no diff (express=0)
Mm01G000375	0	0	0	0	0	0	0	0	0	0	0	0	0	NA	NA	NA	no diff (express=0)
Mm01G000376	0	0	0	0	0	0	0	0	0	0	0	0	0	NA	NA	NA	no diff (express=0)
Mm01G000377	0	0	0	0	0	0	0	0	0	0	0	0	0	NA	NA	NA	no diff (express=0)
Mm01G000378	206	421	176	86	35	50	179.746	345.807	113.038	130.158	38.8158	60.3632	144.655	1.48202	0.0250037	0.096168	no_diff (p.adj > 0.05, -1 <= log2FC <= 1)
Mm01G000379	0	0	0	0	0	0	0	0	0	0	0	0	0	NA	NA	NA	no diff (express=0)
Mm01G000380	0	0	0	0	0	0	0	0	0	0	0	0	0	NA	NA	NA	no diff (express=0)
Mm01G000381	0	0	0	0	0	0	0	0	0	0	0	0	0	NA	NA	NA	no diff (express=0)
Mm01G000382	0	0	0	0	0	0	0	0	0	0	0	0	0	NA	NA	NA	no diff (express=0)
Mm01G000383	0	0	0	0	0	0	0	0	0	0	0	0	0	NA	NA	NA	no diff (express=0)
Mm01G000384	0	0	0	0	0	0	0	0	0	0	0	0	0	NA	NA	NA	no diff (express=0)
Mm01G000385	0	0	0	0	0	0	0	0	0	0	0	0	0	NA	NA	NA	no diff (express=0)
Mm01G000386	273	415	1681	768	2037	2121	238.207	340.878	1079.64	1162.35	2259.08	2560.61	1273.46	-1.8501	0.00471758	0.0269809	down (p.adj < 0.05, log2FC <= -1)
Mm01G000387	0	0	2	0	0	7	0	0	1.28453	0	0	8.45085	1.62256	-2.68312	0.494355	NA	no diff (express=0)
Mm01G000388	0	0	0	0	0	0	0	0	0	0	0	0	0	NA	NA	NA	no diff (express=0)
Mm01G000389	0	0	0	0	0	0	0	0	0	0	0	0	0	NA	NA	NA	no diff (express=0)
Mm01G000390	0	0	0	0	0	0	0	0	0	0	0	0	0	NA	NA	NA	no diff (express=0)
Mm01G000391	0	0	0	0	0	0	0	0	0	0	0	0	0	NA	NA	NA	no diff (express=0)
Mm01G000392	56	13	28	60	62	52	48.863	10.6781	17.9834	90.8082	68.7595	62.7777	49.9783	-1.52381	0.0304101	0.110741	no_diff (p.adj > 0.05, -1 <= log2FC <= 1)
Mm01G000393	7	11	2	0	0	0	6.10788	9.03533	1.28453	0	0	0	2.73796	4.55245	0.0644166	NA	no diff (express=0)
Mm01G000394	0	0	0	0	0	0	0	0	0	0	0	0	0	NA	NA	NA	no diff (express=0)
Mm01G000395	0	0	0	0	0	0	0	0	0	0	0	0	0	NA	NA	NA	no diff (express=0)
Mm01G000396	0	0	0	0	0	0	0	0	0	0	0	0	0	NA	NA	NA	no diff (express=0)
Mm01G000397	0	0	0	0	0	0	0	0	0	0	0	0	0	NA	NA	NA	no diff (express=0)
Mm01G000398	0	0	0	0	0	0	0	0	0	0	0	0	0	NA	NA	NA	no diff (express=0)
Mm01G000399	0	0	0	0	0	0	0	0	0	0	0	0	0	NA	NA	NA	no diff (express=0)
Mm01G000400	0	0	3	0	5	7	0	0	1.92679	0	5.54512	8.45085	2.65379	-2.81623	0.299814	NA	no diff (express=0)
Mm01G000401	0	0	0	0	0	0	0	0	0	0	0	0	0	NA	NA	NA	no diff (express=0)
Mm01G000402	0	0	0	0	0	0	0	0	0	0	0	0	0	NA	NA	NA	no diff (express=0)
Mm01G000403	0	0	0	0	0	0	0	0	0	0	0	0	0	NA	NA	NA	no diff (express=0)
Mm01G000404	480	462	655	396	523	376	418.826	379.484	420.682	599.334	580.019	453.931	475.38	-0.421504	0.0962064	0.251794	no_diff (p.adj > 0.05, -1 <= log2FC <= 1)
Mm01G000405	34	17	23	13	31	29	29.6668	13.9637	14.7721	19.6751	34.3797	35.0107	24.578	-0.620358	0.347988	0.575812	no_diff (p.adj > 0.05, -1 <= log2FC <= 1)
Mm01G000406	419	318	383	125	82	118	365.6	261.203	245.987	189.184	90.9399	142.457	215.895	1.04954	0.0123092	0.0563809	no_diff (p.adj > 0.05, -1 <= log2FC <= 1)
Mm01G000407	0	0	0	0	0	0	0	0	0	0	0	0	0	NA	NA	NA	no diff (express=0)
Mm01G000408	0	0	0	0	0	0	0	0	0	0	0	0	0	NA	NA	NA	no diff (express=0)
Mm01G000409	0	0	0	0	0	0	0	0	0	0	0	0	0	NA	NA	NA	no diff (express=0)
Mm01G000410	760	924	1721	533	1697	1291	663.141	758.967	1105.34	806.68	1882.01	1558.58	1129.12	-0.748982	0.0884748	0.237355	no_diff (p.adj > 0.05, -1 <= log2FC <= 1)
Mm01G000411	0	0	0	0	0	0	0	0	0	0	0	0	0	NA	NA	NA	no diff (express=0)
Mm01G000412	0	0	0	0	0	0	0	0	0	0	0	0	0	NA	NA	NA	no diff (express=0)
Mm01G000413	0	0	0	0	0	0	0	0	0	0	0	0	0	NA	NA	NA	no diff (express=0)
Mm01G000414	0	0	7	1	3	2	0	0	4.49584	1.51347	3.32707	2.41453	1.95849	-0.666822	0.78255	NA	no_diff (p.adj > 0.05, -1 <= log2FC <= 1)
Mm01G000415	31	68	200	118	152	310	27.0492	55.8547	128.453	178.589	168.572	374.252	155.462	-1.76787	0.00999629	0.0482189	down (p.adj < 0.05, log2FC <= -1)
Mm01G000416	0	0	0	0	0	0	0	0	0	0	0	0	0	NA	NA	NA	no diff (express=0)
Mm01G000417	464	442	224	31	36	85	404.865	363.056	143.867	46.9176	39.9249	102.617	183.541	2.26497	0.000190313	0.00204328	rich (p.adj < 0.05, log2FC >= 1)
Mm01G000418	437	314	225	63	92	49	381.306	257.917	144.509	95.3486	102.03	59.1559	173.378	1.61061	0.00158892	0.0113636	rich (p.adj < 0.05, log2FC >= 1)
Mm01G000419	211	320	334	170	126	145	184.109	262.846	214.516	257.29	139.737	175.053	205.592	0.212618	0.581396	0.771478	no_diff (p.adj > 0.05, -1 <= log2FC <= 1)
Mm01G000420	157	169	302	213	459	683	136.991	138.815	193.964	322.369	509.042	824.561	354.29	-1.81735	7.30739e-05	0.000942262	down (p.adj < 0.05, log2FC <= -1)
Mm01G000421	0	0	0	0	0	0	0	0	0	0	0	0	0	NA	NA	NA	no diff (express=0)
Mm01G000422	0	0	0	0	0	0	0	0	0	0	0	0	0	NA	NA	NA	no diff (express=0)
Mm01G000423	0	0	0	0	0	0	0	0	0	0	0	0	0	NA	NA	NA	no diff (express=0)
Mm01G000424	7	0	7	21	13	6	6.10788	0	4.49584	31.7829	14.4173	7.24359	10.6746	-2.32623	0.0795436	0.22066	no_diff (p.adj > 0.05, -1 <= log2FC <= 1)
Mm01G000425	6	0	0	2	0	0	5.23533	0	0	3.02694	0	0	1.37704	0.813583	0.834057	NA	no_diff (p.adj > 0.05, -1 <= log2FC <= 1)
Mm01G000426	402	562	706	232	437	390	350.767	461.623	453.438	351.125	484.643	470.833	428.738	-0.0465607	0.87433	0.94216	no_diff (p.adj > 0.05, -1 <= log2FC <= 1)
Mm01G000427	80	55	120	36	33	39	69.8043	45.1766	77.0716	54.4849	36.5978	47.0833	55.0364	0.481505	0.303506	0.531529	no_diff (p.adj > 0.05, -1 <= log2FC <= 1)
Mm01G000428	0	0	0	0	0	0	0	0	0	0	0	0	0	NA	NA	NA	no diff (express=0)
Mm01G000429	11	8	6	2	0	2	9.5981	6.57115	3.85358	3.02694	0	2.41453	4.24405	1.91736	0.200971	0.409521	no_diff (p.adj > 0.05, -1 <= log2FC <= 1)
Mm01G000430	26	31	32	6	6	5	22.6864	25.4632	20.5524	9.08082	6.65414	6.03632	15.0789	1.66919	0.0188726	0.0780509	no_diff (p.adj > 0.05, -1 <= log2FC <= 1)
Mm01G000431	989	1138	1120	397	572	547	862.956	934.746	719.335	600.848	634.362	660.374	735.437	0.40841	0.0844506	0.229795	no_diff (p.adj > 0.05, -1 <= log2FC <= 1)
Mm01G000432	0	0	0	0	0	0	0	0	0	0	0	0	0	NA	NA	NA	no diff (express=0)
Mm01G000433	0	0	0	0	0	0	0	0	0	0	0	0	0	NA	NA	NA	no diff (express=0)
Mm01G000434	2412	2237	2323	733	856	1183	2104.6	1837.46	1491.98	1109.37	949.324	1428.19	1486.82	0.639948	0.0345179	0.121358	no_diff (p.adj > 0.05, -1 <= log2FC <= 1)
Mm01G000435	0	0	4	6	10	0	0	0	2.56905	9.08082	11.0902	0	3.79002	-2.92954	0.259837	0.482141	no_diff (p.adj > 0.05, -1 <= log2FC <= 1)
Mm01G000436	0	0	0	0	0	0	0	0	0	0	0	0	0	NA	NA	NA	no diff (express=0)
Mm01G000437	17	162	12	0	3	11	14.8334	133.066	7.70716	0	3.32707	13.2799	28.7022	3.214	0.0295461	0.108639	no_diff (p.adj > 0.05, -1 <= log2FC <= 1)
Mm01G000438	2	1	2	0	1	0	1.74511	0.821393	1.28453	0	1.10902	0	0.826675	1.50015	0.588072	NA	no diff (express=0)
Mm01G000439	0	0	0	0	0	0	0	0	0	0	0	0	0	NA	NA	NA	no diff (express=0)
Mm01G000440	0	2	33	0	21	12	0	1.64279	21.1947	0	23.2895	14.4872	10.1024	-0.723342	0.727667	0.864632	no_diff (p.adj > 0.05, -1 <= log2FC <= 1)
Mm01G000441	7	14	17	0	0	0	6.10788	11.4995	10.9185	0	0	0	4.75431	5.35355	0.00605425	0.0328376	rich (p.adj < 0.05, log2FC >= 1)
Mm01G000442	0	0	4	0	0	0	0	0	2.56905	0	0	0	0.428176	1.90008	0.633537	NA	no diff (express=0)
Mm01G000443	1571	1812	1024	176	180	389	1370.78	1488.36	657.678	266.371	199.624	469.626	742.074	1.91001	0.000157247	0.00176054	rich (p.adj < 0.05, log2FC >= 1)
Mm01G000444	71	169	1	44	88	95	61.9513	138.815	0.642263	66.5927	97.5941	114.69	80.0477	-0.471068	0.702006	0.849256	no_diff (p.adj > 0.05, -1 <= log2FC <= 1)
Mm01G000445	0	0	0	0	0	0	0	0	0	0	0	0	0	NA	NA	NA	no diff (express=0)
Mm01G000446	0	10	0	0	2	1	0	8.21393	0	0	2.21805	1.20726	1.93987	1.23747	0.697945	NA	no diff (express=0)
Mm01G000447	1382	1206	1998	749	824	687	1205.87	990.6	1283.24	1133.59	913.835	829.391	1059.42	0.275206	0.307008	0.535192	no_diff (p.adj > 0.05, -1 <= log2FC <= 1)
Mm01G000448	0	0	0	0	0	0	0	0	0	0	0	0	0	NA	NA	NA	no diff (express=0)
Mm01G000449	0	0	0	0	0	0	0	0	0	0	0	0	0	NA	NA	NA	no diff (express=0)
Mm01G000450	0	0	0	0	0	0	0	0	0	0	0	0	0	NA	NA	NA	no diff (express=0)
Mm01G000451	451	294	863	233	449	293	393.522	241.49	554.273	352.639	497.952	353.728	398.934	-0.0180074	0.966287	0.984096	no_diff (p.adj > 0.05, -1 <= log2FC <= 1)
Mm01G000452	0	0	0	0	0	0	0	0	0	0	0	0	0	NA	NA	NA	no diff (express=0)
Mm01G000453	22	19	27	7	5	4	19.1962	15.6065	17.3411	10.5943	5.54512	4.82906	12.1854	1.33697	0.0924111	0.244652	no_diff (p.adj > 0.05, -1 <= log2FC <= 1)
Mm01G000454	241	564	505	282	267	166	210.286	463.266	324.343	426.799	296.109	200.406	320.201	0.113351	0.812063	0.908743	no_diff (p.adj > 0.05, -1 <= log2FC <= 1)
Mm01G000455	6	6	2	5	0	0	5.23533	4.92836	1.28453	7.56735	0	0	3.16926	0.63035	0.77388	NA	no_diff (p.adj > 0.05, -1 <= log2FC <= 1)
Mm01G000456	0	0	0	0	0	0	0	0	0	0	0	0	0	NA	NA	NA	no diff (express=0)
Mm01G000457	468	934	730	141	221	337	408.355	767.181	468.852	213.399	245.094	406.848	418.288	0.925369	0.035683	0.124219	no_diff (p.adj > 0.05, -1 <= log2FC <= 1)
Mm01G000458	0	0	1	4	61	30	0	0	0.642263	6.05388	67.6504	36.2179	18.4274	-7.05351	2.81643e-05	0.000418528	down (p.adj < 0.05, log2FC <= -1)
Mm01G000459	0	0	0	0	0	0	0	0	0	0	0	0	0	NA	NA	NA	no diff (express=0)
Mm01G000460	3	0	0	2	0	0	2.61766	0	0	3.02694	0	0	0.940767	-0.193377	0.960692	NA	no_diff (p.adj > 0.05, -1 <= log2FC <= 1)
Mm01G000461	0	0	0	0	0	0	0	0	0	0	0	0	0	NA	NA	NA	no diff (express=0)
Mm01G000462	249	397	462	280	416	429	217.266	326.093	296.726	423.772	461.354	517.916	373.854	-0.739795	0.0129945	0.0587583	no_diff (p.adj > 0.05, -1 <= log2FC <= 1)
Mm01G000463	207	142	186	43	32	50	180.619	116.638	119.461	65.0792	35.4888	60.3632	96.2748	1.37726	0.00233634	0.0154813	rich (p.adj < 0.05, log2FC >= 1)
Mm01G000464	0	0	0	0	0	0	0	0	0	0	0	0	0	NA	NA	NA	no diff (express=0)
Mm01G000465	790	772	1039	313	649	594	689.318	634.116	667.312	473.716	719.756	717.115	650.222	0.0581584	0.841175	0.923986	no_diff (p.adj > 0.05, -1 <= log2FC <= 1)
Mm01G000466	8	11	7	0	0	4	6.98043	9.03533	4.49584	0	0	4.82906	4.22344	2.06439	0.262717	0.485556	no_diff (p.adj > 0.05, -1 <= log2FC <= 1)
Mm01G000467	2	4	3	10	2	0	1.74511	3.28557	1.92679	15.1347	2.21805	0	4.0517	-1.29899	0.463385	0.679779	no_diff (p.adj > 0.05, -1 <= log2FC <= 1)
Mm01G000468	1	0	1	0	0	0	0.872554	0	0.642263	0	0	0	0.25247	1.11829	0.781982	NA	no diff (express=0)
Mm01G000469	407	608	834	368	747	663	355.13	499.407	535.648	556.957	828.441	800.416	596	-0.653083	0.0485294	0.154634	no_diff (p.adj > 0.05, -1 <= log2FC <= 1)
Mm01G000470	10	0	2	0	0	0	8.72554	0	1.28453	0	0	0	1.66834	3.83868	0.328373	NA	no diff (express=0)
Mm01G000471	15	59	37	21	21	12	13.0883	48.4622	23.7637	31.7829	23.2895	14.4872	25.8123	0.299752	0.695492	0.845116	no_diff (p.adj > 0.05, -1 <= log2FC <= 1)
Mm01G000472	62	29	125	47	29	3	54.0984	23.8204	80.2829	71.1331	32.1617	3.62179	44.1864	0.572049	0.573564	0.765395	no_diff (p.adj > 0.05, -1 <= log2FC <= 1)
Mm01G000473	0	0	0	0	0	0	0	0	0	0	0	0	0	NA	NA	NA	no diff (express=0)
Mm01G000474	0	0	0	0	0	0	0	0	0	0	0	0	0	NA	NA	NA	no diff (express=0)
Mm01G000475	10	0	2	6	0	0	8.72554	0	1.28453	9.08082	0	0	3.18181	0.154071	0.958226	NA	no_diff (p.adj > 0.05, -1 <= log2FC <= 1)
Mm01G000476	498	751	960	269	381	459	434.532	616.866	616.573	407.123	422.538	554.134	508.628	0.269442	0.38357	0.61103	no_diff (p.adj > 0.05, -1 <= log2FC <= 1)
Mm01G000477	4	7	6	5	4	5	3.49022	5.74975	3.85358	7.56735	4.43609	6.03632	5.18889	-0.45368	0.665392	0.826372	no_diff (p.adj > 0.05, -1 <= log2FC <= 1)
Mm01G000478	0	0	0	0	0	0	0	0	0	0	0	0	0	NA	NA	NA	no diff (express=0)
Mm01G000479	0	0	0	0	0	0	0	0	0	0	0	0	0	NA	NA	NA	no diff (express=0)
Mm01G000480	0	0	0	0	0	4	0	0	0	0	0	4.82906	0.804843	-3.50812	0.377625	NA	no diff (express=0)
Mm01G000481	0	0	0	0	0	0	0	0	0	0	0	0	0	NA	NA	NA	no diff (express=0)
Mm01G000482	0	0	0	0	0	0	0	0	0	0	0	0	0	NA	NA	NA	no diff (express=0)
Mm01G000483	0	0	0	0	0	0	0	0	0	0	0	0	0	NA	NA	NA	no diff (express=0)
Mm01G000484	0	0	0	3	0	0	0	0	0	4.54041	0	0	0.756735	-3.39248	0.39423	NA	no diff (express=0)
Mm01G000485	0	0	0	0	0	0	0	0	0	0	0	0	0	NA	NA	NA	no diff (express=0)
Mm01G000486	0	0	0	0	0	0	0	0	0	0	0	0	0	NA	NA	NA	no diff (express=0)
Mm01G000487	0	0	0	0	0	0	0	0	0	0	0	0	0	NA	NA	NA	no diff (express=0)
Mm01G000488	3	3	0	0	0	0	2.61766	2.46418	0	0	0	0	0.846974	2.85772	0.469107	NA	no diff (express=0)
Mm01G000489	90	218	290	76	68	63	78.5299	179.064	186.256	115.024	75.4136	76.0576	118.391	0.740263	0.142082	0.326381	no_diff (p.adj > 0.05, -1 <= log2FC <= 1)
Mm01G000490	1789	2823	3305	1832	2998	3188	1561	2318.79	2122.68	2772.68	3324.85	3848.76	2658.13	-0.728632	0.0135597	0.0606018	no_diff (p.adj > 0.05, -1 <= log2FC <= 1)
Mm01G000491	0	0	0	0	0	0	0	0	0	0	0	0	0	NA	NA	NA	no diff (express=0)
Mm01G000492	118	151	276	208	189	377	102.961	124.03	177.265	314.802	209.605	455.139	230.634	-1.27492	0.0045975	0.0264154	down (p.adj < 0.05, log2FC <= -1)
Mm01G000493	16	13	34	30	0	22	13.9609	10.6781	21.837	45.4041	0	26.5598	19.74	-0.623438	0.648636	0.816473	no_diff (p.adj > 0.05, -1 <= log2FC <= 1)
Mm01G000494	0	0	0	0	0	0	0	0	0	0	0	0	0	NA	NA	NA	no diff (express=0)
Mm01G000495	0	0	1	1	2	0	0	0	0.642263	1.51347	2.21805	0	0.728963	-2.16931	0.557802	NA	no diff (express=0)
Mm01G000496	12	0	10	60	185	93	10.4707	0	6.42263	90.8082	205.169	112.276	70.8577	-4.59785	1.3232e-06	2.98852e-05	down (p.adj < 0.05, log2FC <= -1)
Mm01G000497	0	0	0	0	0	0	0	0	0	0	0	0	0	NA	NA	NA	no diff (express=0)
Mm01G000498	5043	6869	4753	1057	2323	2226	4400.29	5642.15	3052.68	1599.74	2576.26	2687.37	3326.41	0.931778	0.0151977	0.0661037	no_diff (p.adj > 0.05, -1 <= log2FC <= 1)
Mm01G000499	0	0	0	0	0	0	0	0	0	0	0	0	0	NA	NA	NA	no diff (express=0)
Mm01G000500	8	6	7	5	0	0	6.98043	4.92836	4.49584	7.56735	0	0	3.99533	1.16073	0.559563	0.754769	no_diff (p.adj > 0.05, -1 <= log2FC <= 1)
Mm01G000501	0	0	0	0	0	0	0	0	0	0	0	0	0	NA	NA	NA	no diff (express=0)
Mm01G000502	6055	10925	27630	11587	31935	26449	5283.32	8973.72	17745.7	17536.6	35416.7	31930.9	19481.2	-1.40728	0.00975941	0.0473645	down (p.adj < 0.05, log2FC <= -1)
Mm01G000503	117	183	247	1	147	150	102.089	150.315	158.639	1.51347	163.026	181.09	126.112	0.248675	0.825653	0.915782	no_diff (p.adj > 0.05, -1 <= log2FC <= 1)
Mm01G000504	9	14	16	10	7	0	7.85299	11.4995	10.2762	15.1347	7.76317	0	8.75443	0.386498	0.7732	0.88966	no_diff (p.adj > 0.05, -1 <= log2FC <= 1)
Mm01G000505	0	0	0	0	0	0	0	0	0	0	0	0	0	NA	NA	NA	no diff (express=0)
Mm01G000506	0	0	0	0	0	0	0	0	0	0	0	0	0	NA	NA	NA	no diff (express=0)
Mm01G000507	0	0	0	2	4	5	0	0	0	3.02694	4.43609	6.03632	2.24989	-4.98854	0.0438351	NA	no diff (express=0)
Mm01G000508	8	5	8	6	2	4	6.98043	4.10697	5.13811	9.08082	2.21805	4.82906	5.39224	0.0316139	0.977544	0.989194	no_diff (p.adj > 0.05, -1 <= log2FC <= 1)
Mm01G000509	0	0	0	0	0	0	0	0	0	0	0	0	0	NA	NA	NA	no diff (express=0)
Mm01G000510	0	0	0	0	0	0	0	0	0	0	0	0	0	NA	NA	NA	no diff (express=0)
Mm01G000511	0	8	7	15	5	7	0	6.57115	4.49584	22.7021	5.54512	8.45085	7.96083	-1.71262	0.224794	0.439572	no_diff (p.adj > 0.05, -1 <= log2FC <= 1)
Mm01G000512	9	14	20	12	10	28	7.85299	11.4995	12.8453	18.1616	11.0902	33.8034	15.8755	-0.964407	0.218681	0.431586	no_diff (p.adj > 0.05, -1 <= log2FC <= 1)
Mm01G000513	0	0	0	0	0	0	0	0	0	0	0	0	0	NA	NA	NA	no diff (express=0)
Mm01G000514	25	8	13	32	26	4	21.8139	6.57115	8.34942	48.431	28.8346	4.82906	19.8049	-1.15977	0.262885	0.485672	no_diff (p.adj > 0.05, -1 <= log2FC <= 1)
Mm01G000515	71	125	123	69	74	100	61.9513	102.674	78.9984	104.429	82.0677	120.726	91.8079	-0.333273	0.412642	0.63616	no_diff (p.adj > 0.05, -1 <= log2FC <= 1)
Mm01G000516	114	59	161	31	63	49	99.4712	48.4622	103.404	46.9176	69.8685	59.1559	71.2133	0.512129	0.306534	0.534686	no_diff (p.adj > 0.05, -1 <= log2FC <= 1)
Mm01G000517	0	0	0	0	0	0	0	0	0	0	0	0	0	NA	NA	NA	no diff (express=0)
Mm01G000518	6	9	8	0	0	2	5.23533	7.39254	5.13811	0	0	2.41453	3.36342	2.84637	0.128706	NA	no diff (express=0)
Mm01G000519	0	0	0	0	0	0	0	0	0	0	0	0	0	NA	NA	NA	no diff (express=0)
Mm01G000520	578	678	1013	925	2610	2227	504.336	556.905	650.613	1399.96	2894.55	2688.58	1449.16	-2.02834	1.0979e-07	3.45126e-06	down (p.adj < 0.05, log2FC <= -1)
Mm01G000521	0	0	2	0	0	0	0	0	1.28453	0	0	0	0.214088	0.917341	0.821271	NA	no_diff (p.adj > 0.05, -1 <= log2FC <= 1)
Mm01G000522	0	0	0	0	0	0	0	0	0	0	0	0	0	NA	NA	NA	no diff (express=0)
Mm01G000523	0	0	3	4	0	0	0	0	1.92679	6.05388	0	0	1.33011	-1.60865	0.679322	NA	no diff (express=0)
Mm01G000524	0	0	0	4	0	0	0	0	0	6.05388	0	0	1.00898	-3.81253	0.336046	NA	no diff (express=0)
Mm01G000525	0	4	6	7	10	15	0	3.28557	3.85358	10.5943	11.0902	18.109	7.82211	-2.45417	0.0485931	0.154781	no_diff (p.adj > 0.05, -1 <= log2FC <= 1)
Mm01G000526	5	1	0	2	0	0	4.36277	0.821393	0	3.02694	0	0	1.36852	0.807728	0.809579	NA	no_diff (p.adj > 0.05, -1 <= log2FC <= 1)
Mm01G000527	0	0	0	0	0	0	0	0	0	0	0	0	0	NA	NA	NA	no diff (express=0)
Mm01G000528	0	0	0	0	0	0	0	0	0	0	0	0	0	NA	NA	NA	no diff (express=0)
Mm01G000529	9	1	7	0	2	0	7.85299	0.821393	4.49584	0	2.21805	0	2.56471	2.4981	0.261611	NA	no diff (express=0)
Mm01G000530	0	0	0	0	0	0	0	0	0	0	0	0	0	NA	NA	NA	no diff (express=0)
Mm01G000531	0	0	0	0	0	0	0	0	0	0	0	0	0	NA	NA	NA	no diff (express=0)
Mm01G000532	10	2	13	6	0	0	8.72554	1.64279	8.34942	9.08082	0	0	4.6331	1.07992	0.60379	0.786078	no_diff (p.adj > 0.05, -1 <= log2FC <= 1)
Mm01G000533	39	58	46	31	5	18	34.0296	47.6408	29.5441	46.9176	5.54512	21.7308	30.9013	0.59589	0.484744	0.697667	no_diff (p.adj > 0.05, -1 <= log2FC <= 1)
Mm01G000534	0	0	0	0	0	0	0	0	0	0	0	0	0	NA	NA	NA	no diff (express=0)
Mm01G000535	6	3	13	8	22	2	5.23533	2.46418	8.34942	12.1078	24.3985	2.41453	9.16162	-1.27316	0.27943	0.505025	no_diff (p.adj > 0.05, -1 <= log2FC <= 1)
Mm01G000536	1	0	0	0	0	0	0.872554	0	0	0	0	0	0.145426	0.249044	0.951333	NA	no_diff (p.adj > 0.05, -1 <= log2FC <= 1)
Mm01G000537	0	1	0	0	0	0	0	0.821393	0	0	0	0	0.136899	0.249044	0.951333	NA	no_diff (p.adj > 0.05, -1 <= log2FC <= 1)
Mm01G000538	0	0	0	0	0	0	0	0	0	0	0	0	0	NA	NA	NA	no diff (express=0)
Mm01G000539	0	0	2	0	0	0	0	0	1.28453	0	0	0	0.214088	0.917341	0.821271	NA	no_diff (p.adj > 0.05, -1 <= log2FC <= 1)
Mm01G000540	0	0	0	0	0	0	0	0	0	0	0	0	0	NA	NA	NA	no diff (express=0)
Mm01G000541	0	0	0	0	0	0	0	0	0	0	0	0	0	NA	NA	NA	no diff (express=0)
Mm01G000542	484	587	739	127	114	226	422.316	482.158	474.633	192.211	126.429	272.842	328.431	1.22205	0.00161219	0.0114892	rich (p.adj < 0.05, log2FC >= 1)
Mm01G000543	190	74	326	226	268	4	165.785	60.7831	209.378	342.044	297.218	4.82906	180.006	-0.562498	0.617492	0.795325	no_diff (p.adj > 0.05, -1 <= log2FC <= 1)
Mm01G000544	401	261	406	190	99	51	349.894	214.384	260.759	287.559	109.793	61.5705	213.993	0.849258	0.180553	0.382827	no_diff (p.adj > 0.05, -1 <= log2FC <= 1)
Mm01G000545	1	8	7	3	5	0	0.872554	6.57115	4.49584	4.54041	5.54512	0	3.67085	0.249766	0.883792	0.946354	no_diff (p.adj > 0.05, -1 <= log2FC <= 1)
Mm01G000546	6	2	0	0	0	0	5.23533	1.64279	0	0	0	0	1.14635	3.29505	0.402611	NA	no diff (express=0)
Mm01G000547	1296	1217	1411	619	1651	1354	1130.83	999.636	906.234	936.838	1831	1634.64	1239.86	-0.536414	0.134374	0.314941	no_diff (p.adj > 0.05, -1 <= log2FC <= 1)
Mm01G000548	0	0	0	0	0	0	0	0	0	0	0	0	0	NA	NA	NA	no diff (express=0)
Mm01G000549	229	229	357	124	133	118	199.815	188.099	229.288	187.67	147.5	142.457	182.472	0.373495	0.210236	0.421245	no_diff (p.adj > 0.05, -1 <= log2FC <= 1)
Mm01G000550	0	0	0	0	0	0	0	0	0	0	0	0	0	NA	NA	NA	no diff (express=0)
Mm01G000551	877	706	665	186	424	332	765.23	579.904	427.105	281.505	470.226	400.812	487.464	0.619035	0.106078	0.269197	no_diff (p.adj > 0.05, -1 <= log2FC <= 1)
Mm01G000552	2	0	3	0	0	0	1.74511	0	1.92679	0	0	0	0.611983	2.39759	0.54515	NA	no diff (express=0)
Mm01G000553	0	0	0	0	0	4	0	0	0	0	0	4.82906	0.804843	-3.50812	0.377625	NA	no diff (express=0)
Mm01G000554	0	0	0	0	0	0	0	0	0	0	0	0	0	NA	NA	NA	no diff (express=0)
Mm01G000555	3943	1623	5583	2367	12575	36839	3440.48	1333.12	3585.76	3582.38	13946	44474.4	11727	-2.89086	0.000559513	0.00492213	down (p.adj < 0.05, log2FC <= -1)
Mm01G000556	0	0	0	0	0	0	0	0	0	0	0	0	0	NA	NA	NA	no diff (express=0)
Mm01G000557	132	137	218	51	91	28	115.177	112.531	140.013	77.187	100.921	33.8034	96.6055	0.795245	0.127105	0.304061	no_diff (p.adj > 0.05, -1 <= log2FC <= 1)
Mm01G000558	1101	957	730	111	131	694	960.682	786.073	468.852	167.995	145.282	837.841	561.121	0.94419	0.205042	0.415003	no_diff (p.adj > 0.05, -1 <= log2FC <= 1)
Mm01G000559	224	398	825	613	2100	1845	195.452	326.915	529.867	927.757	2328.95	2227.4	1089.39	-2.38129	1.2128e-05	0.000202226	down (p.adj < 0.05, log2FC <= -1)
Mm01G000560	9	25	57	34	20	21	7.85299	20.5348	36.609	51.458	22.1805	25.3525	27.3313	-0.59331	0.463307	0.679774	no_diff (p.adj > 0.05, -1 <= log2FC <= 1)
Mm01G000561	0	0	0	0	0	0	0	0	0	0	0	0	0	NA	NA	NA	no diff (express=0)
Mm01G000562	0	0	0	0	0	0	0	0	0	0	0	0	0	NA	NA	NA	no diff (express=0)
Mm01G000563	0	0	0	0	0	0	0	0	0	0	0	0	0	NA	NA	NA	no diff (express=0)
Mm01G000564	813	313	993	479	2942	8338	709.387	257.096	637.767	724.952	3262.75	10066.2	2609.69	-3.131	0.000253759	0.00258644	down (p.adj < 0.05, log2FC <= -1)
Mm01G000565	0	0	0	0	0	0	0	0	0	0	0	0	0	NA	NA	NA	no diff (express=0)
Mm01G000566	0	0	0	0	0	0	0	0	0	0	0	0	0	NA	NA	NA	no diff (express=0)
Mm01G000567	5	10	0	4	6	0	4.36277	8.21393	0	6.05388	6.65414	0	4.21412	-0.0190922	0.992813	0.9967	no_diff (p.adj > 0.05, -1 <= log2FC <= 1)
Mm01G000568	0	0	0	0	0	0	0	0	0	0	0	0	0	NA	NA	NA	no diff (express=0)
Mm01G000569	267	392	549	198	595	350	232.972	321.986	352.603	299.667	659.869	422.542	381.607	-0.607471	0.150215	0.33883	no_diff (p.adj > 0.05, -1 <= log2FC <= 1)
Mm01G000570	0	0	0	0	0	0	0	0	0	0	0	0	0	NA	NA	NA	no diff (express=0)
Mm01G000571	0	0	0	0	0	0	0	0	0	0	0	0	0	NA	NA	NA	no diff (express=0)
Mm01G000572	0	0	0	0	0	0	0	0	0	0	0	0	0	NA	NA	NA	no diff (express=0)
Mm01G000573	13	6	11	4	5	9	11.3432	4.92836	7.0649	6.05388	5.54512	10.8654	7.63347	0.0482434	0.959776	0.981211	no_diff (p.adj > 0.05, -1 <= log2FC <= 1)
Mm01G000574	0	0	0	0	0	0	0	0	0	0	0	0	0	NA	NA	NA	no diff (express=0)
Mm01G000575	0	0	0	0	0	0	0	0	0	0	0	0	0	NA	NA	NA	no diff (express=0)
Mm01G000576	0	0	0	0	0	0	0	0	0	0	0	0	0	NA	NA	NA	no diff (express=0)
Mm01G000577	0	0	0	0	0	0	0	0	0	0	0	0	0	NA	NA	NA	no diff (express=0)
Mm01G000578	0	0	0	0	0	0	0	0	0	0	0	0	0	NA	NA	NA	no diff (express=0)
Mm01G000579	92	40	99	99	86	5	80.275	32.8557	63.5841	149.834	95.376	6.03632	71.3268	-0.505894	0.611311	0.791497	no_diff (p.adj > 0.05, -1 <= log2FC <= 1)
Mm01G000580	0	0	0	0	0	0	0	0	0	0	0	0	0	NA	NA	NA	no diff (express=0)
Mm01G000581	99	43	111	99	86	6	86.3829	35.3199	71.2912	149.834	95.376	7.24359	74.2412	-0.385524	0.689933	0.841314	no_diff (p.adj > 0.05, -1 <= log2FC <= 1)
Mm01G000582	0	0	0	0	0	0	0	0	0	0	0	0	0	NA	NA	NA	no diff (express=0)
Mm01G000583	0	0	0	0	0	0	0	0	0	0	0	0	0	NA	NA	NA	no diff (express=0)
Mm01G000584	0	0	0	0	0	0	0	0	0	0	0	0	0	NA	NA	NA	no diff (express=0)
Mm01G000585	0	0	0	0	0	0	0	0	0	0	0	0	0	NA	NA	NA	no diff (express=0)
Mm01G000586	45	11	13	4	2	4	39.2649	9.03533	8.34942	6.05388	2.21805	4.82906	11.6251	2.12529	0.0566658	0.173156	no_diff (p.adj > 0.05, -1 <= log2FC <= 1)
Mm01G000587	59	59	63	22	22	68	51.4807	48.4622	40.4626	33.2963	24.3985	82.094	46.6991	0.00395746	0.995047	0.997743	no_diff (p.adj > 0.05, -1 <= log2FC <= 1)
Mm01G000588	0	0	0	0	0	0	0	0	0	0	0	0	0	NA	NA	NA	no diff (express=0)
Mm01G000589	0	0	0	0	0	0	0	0	0	0	0	0	0	NA	NA	NA	no diff (express=0)
Mm01G000590	0	0	0	0	0	0	0	0	0	0	0	0	0	NA	NA	NA	no diff (express=0)
Mm01G000591	0	0	0	0	0	0	0	0	0	0	0	0	0	NA	NA	NA	no diff (express=0)
Mm01G000592	51	40	39	9	0	24	44.5003	32.8557	25.0483	13.6212	0	28.9743	24.1666	1.26728	0.305566	0.533495	no_diff (p.adj > 0.05, -1 <= log2FC <= 1)
Mm01G000593	3	0	0	0	0	0	2.61766	0	0	0	0	0	0.436277	1.89188	0.635041	NA	no diff (express=0)
Mm01G000594	0	0	0	0	0	0	0	0	0	0	0	0	0	NA	NA	NA	no diff (express=0)
Mm01G000595	0	0	0	0	0	0	0	0	0	0	0	0	0	NA	NA	NA	no diff (express=0)
Mm01G000596	0	0	0	0	0	0	0	0	0	0	0	0	0	NA	NA	NA	no diff (express=0)
Mm01G000597	0	0	0	0	0	0	0	0	0	0	0	0	0	NA	NA	NA	no diff (express=0)
Mm01G000598	0	0	0	0	0	0	0	0	0	0	0	0	0	NA	NA	NA	no diff (express=0)
Mm01G000599	0	0	0	0	0	0	0	0	0	0	0	0	0	NA	NA	NA	no diff (express=0)
Mm01G000600	0	0	0	0	0	0	0	0	0	0	0	0	0	NA	NA	NA	no diff (express=0)
Mm01G000601	0	0	0	0	0	0	0	0	0	0	0	0	0	NA	NA	NA	no diff (express=0)
Mm01G000602	9	0	0	4	0	0	7.85299	0	0	6.05388	0	0	2.31781	0.386436	0.919238	NA	no_diff (p.adj > 0.05, -1 <= log2FC <= 1)
Mm01G000603	292	167	169	82	34	45	254.786	137.173	108.543	124.105	37.7068	54.3269	119.44	1.2166	0.0540584	0.167054	no_diff (p.adj > 0.05, -1 <= log2FC <= 1)
Mm01G000604	0	0	0	0	0	0	0	0	0	0	0	0	0	NA	NA	NA	no diff (express=0)
Mm01G000605	0	0	0	0	0	0	0	0	0	0	0	0	0	NA	NA	NA	no diff (express=0)
Mm01G000606	0	0	0	0	0	0	0	0	0	0	0	0	0	NA	NA	NA	no diff (express=0)
Mm01G000607	0	0	0	0	0	0	0	0	0	0	0	0	0	NA	NA	NA	no diff (express=0)
Mm01G000608	183	114	105	33	14	54	159.677	93.6388	67.4376	49.9445	15.5263	65.1923	75.2362	1.2978	0.0583859	0.1768	no_diff (p.adj > 0.05, -1 <= log2FC <= 1)
Mm01G000609	27	21	41	9	11	7	23.559	17.2493	26.3328	13.6212	12.1993	8.45085	16.9021	0.978136	0.145761	0.331767	no_diff (p.adj > 0.05, -1 <= log2FC <= 1)
Mm01G000610	0	0	0	0	0	0	0	0	0	0	0	0	0	NA	NA	NA	no diff (express=0)
Mm01G000611	0	0	0	0	0	0	0	0	0	0	0	0	0	NA	NA	NA	no diff (express=0)
Mm01G000612	485	399	726	89	86	67	423.189	327.736	466.283	134.699	95.376	80.8867	254.695	1.97376	3.89852e-08	1.36313e-06	rich (p.adj < 0.05, log2FC >= 1)
Mm01G000613	0	0	0	0	0	0	0	0	0	0	0	0	0	NA	NA	NA	no diff (express=0)
Mm01G000614	0	0	0	0	0	0	0	0	0	0	0	0	0	NA	NA	NA	no diff (express=0)
Mm01G000615	230	241	350	143	297	175	200.687	197.956	224.792	216.426	329.38	211.271	230.085	-0.281477	0.394232	0.620643	no_diff (p.adj > 0.05, -1 <= log2FC <= 1)
Mm01G000616	463	387	586	141	228	146	403.993	317.879	376.366	213.399	252.857	176.261	290.126	0.772729	0.00956231	0.0466156	no_diff (p.adj > 0.05, -1 <= log2FC <= 1)
Mm01G000617	170	174	164	57	69	95	148.334	142.922	105.331	86.2678	76.5226	114.69	112.345	0.513515	0.171556	0.370236	no_diff (p.adj > 0.05, -1 <= log2FC <= 1)
Mm01G000618	0	0	0	0	0	0	0	0	0	0	0	0	0	NA	NA	NA	no diff (express=0)
Mm01G000619	385	1057	283	8	17	52	335.933	868.213	181.761	12.1078	18.8534	62.7777	246.608	3.88134	1.95594e-06	4.18621e-05	rich (p.adj < 0.05, log2FC >= 1)
Mm01G000620	142	312	199	13	42	33	123.903	256.275	127.81	19.6751	46.579	39.8397	102.347	2.24985	5.964e-05	0.000791975	rich (p.adj < 0.05, log2FC >= 1)
Mm01G000621	99	137	134	5	7	7	86.3829	112.531	86.0633	7.56735	7.76317	8.45085	51.4597	3.58024	3.78944e-11	2.57426e-09	rich (p.adj < 0.05, log2FC >= 1)
Mm01G000622	0	0	0	0	0	0	0	0	0	0	0	0	0	NA	NA	NA	no diff (express=0)
Mm01G000623	0	0	0	0	0	0	0	0	0	0	0	0	0	NA	NA	NA	no diff (express=0)
Mm01G000624	0	0	0	0	0	0	0	0	0	0	0	0	0	NA	NA	NA	no diff (express=0)
Mm01G000625	4	15	0	8	10	17	3.49022	12.3209	0	12.1078	11.0902	20.5235	9.9221	-1.478	0.303509	0.531529	no_diff (p.adj > 0.05, -1 <= log2FC <= 1)
Mm01G000626	0	2	0	0	0	0	0	1.64279	0	0	0	0	0.273798	1.22398	0.76144	NA	no diff (express=0)
Mm01G000627	0	0	0	0	0	0	0	0	0	0	0	0	0	NA	NA	NA	no diff (express=0)
Mm01G000628	0	0	0	0	0	0	0	0	0	0	0	0	0	NA	NA	NA	no diff (express=0)
Mm01G000629	185	186	231	112	189	154	161.423	152.779	148.363	169.509	209.605	185.919	171.266	-0.291166	0.28557	0.511492	no_diff (p.adj > 0.05, -1 <= log2FC <= 1)
Mm01G000630	0	0	0	0	0	0	0	0	0	0	0	0	0	NA	NA	NA	no diff (express=0)
Mm01G000631	0	0	0	0	0	0	0	0	0	0	0	0	0	NA	NA	NA	no diff (express=0)
Mm01G000632	262	272	379	163	113	114	228.609	223.419	243.418	246.696	125.32	137.628	200.848	0.452674	0.252543	0.473239	no_diff (p.adj > 0.05, -1 <= log2FC <= 1)
Mm01G000633	0	0	0	0	0	0	0	0	0	0	0	0	0	NA	NA	NA	no diff (express=0)
Mm01G000634	1798	1452	1414	747	1163	1301	1568.85	1192.66	908.16	1130.56	1289.79	1570.65	1276.78	-0.121592	0.714972	0.857373	no_diff (p.adj > 0.05, -1 <= log2FC <= 1)
Mm01G000635	0	0	0	0	0	0	0	0	0	0	0	0	0	NA	NA	NA	no diff (express=0)
Mm01G000636	2	0	0	0	0	1	1.74511	0	0	0	0	1.20726	0.492062	0.338636	0.932956	NA	no_diff (p.adj > 0.05, -1 <= log2FC <= 1)
Mm01G000637	85	108	123	35	64	49	74.1671	88.7105	78.9984	52.9715	70.9775	59.1559	70.8301	0.39737	0.280503	0.506184	no_diff (p.adj > 0.05, -1 <= log2FC <= 1)
Mm01G000638	404	544	531	178	330	315	352.512	446.838	341.042	269.398	365.978	380.288	359.343	0.165325	0.584129	0.773392	no_diff (p.adj > 0.05, -1 <= log2FC <= 1)
Mm01G000639	0	0	0	0	0	0	0	0	0	0	0	0	0	NA	NA	NA	no diff (express=0)
Mm01G000640	0	0	0	0	0	0	0	0	0	0	0	0	0	NA	NA	NA	no diff (express=0)
Mm01G000641	19	24	33	16	28	29	16.5785	19.7134	21.1947	24.2155	31.0527	35.0107	24.6276	-0.65266	0.228994	0.444757	no_diff (p.adj > 0.05, -1 <= log2FC <= 1)
Mm01G000642	0	0	0	0	0	0	0	0	0	0	0	0	0	NA	NA	NA	no diff (express=0)
Mm01G000643	3	3	3	0	5	1	2.61766	2.46418	1.92679	0	5.54512	1.20726	2.2935	0.0128266	0.994328	NA	no_diff (p.adj > 0.05, -1 <= log2FC <= 1)
Mm01G000644	8	11	12	11	9	5	6.98043	9.03533	7.70716	16.6482	9.98121	6.03632	9.3981	-0.447935	0.605966	0.787539	no_diff (p.adj > 0.05, -1 <= log2FC <= 1)
Mm01G000645	0	0	0	0	0	0	0	0	0	0	0	0	0	NA	NA	NA	no diff (express=0)
Mm01G000646	79	82	48	51	57	18	68.9318	67.3543	30.8286	77.187	63.2143	21.7308	54.8745	0.0442202	0.947996	0.976438	no_diff (p.adj > 0.05, -1 <= log2FC <= 1)
Mm01G000647	29	59	175	15	42	40	25.3041	48.4622	112.396	22.7021	46.579	48.2906	50.6223	0.662135	0.369094	0.597579	no_diff (p.adj > 0.05, -1 <= log2FC <= 1)
Mm01G000648	0	0	0	0	0	0	0	0	0	0	0	0	0	NA	NA	NA	no diff (express=0)
Mm01G000649	12	8	33	13	10	6	10.4707	6.57115	21.1947	19.6751	11.0902	7.24359	12.7076	0.0284471	0.97483	0.987747	no_diff (p.adj > 0.05, -1 <= log2FC <= 1)
Mm01G000650	1	1	2	1	0	0	0.872554	0.821393	1.28453	1.51347	0	0	0.748657	1.13625	0.692211	NA	no diff (express=0)
Mm01G000651	1	3	0	3	7	10	0.872554	2.46418	0	4.54041	7.76317	12.0726	4.61883	-2.91329	0.0612641	0.182786	no_diff (p.adj > 0.05, -1 <= log2FC <= 1)
Mm01G000652	2	4	2	0	2	0	1.74511	3.28557	1.28453	0	2.21805	0	1.42221	1.44219	0.549347	NA	no diff (express=0)
Mm01G000653	5	2	4	2	7	17	4.36277	1.64279	2.56905	3.02694	7.76317	20.5235	6.64803	-1.88384	0.122272	0.296158	no_diff (p.adj > 0.05, -1 <= log2FC <= 1)
Mm01G000654	0	0	0	0	0	0	0	0	0	0	0	0	0	NA	NA	NA	no diff (express=0)
Mm01G000655	29	7	45	12	33	5	25.3041	5.74975	28.9018	18.1616	36.5978	6.03632	20.1252	-0.0214133	0.982915	0.991712	no_diff (p.adj > 0.05, -1 <= log2FC <= 1)
Mm01G000656	1578	1783	2347	738	1142	935	1376.89	1464.54	1507.39	1116.94	1266.5	1128.79	1310.18	0.308035	0.12202	0.295778	no_diff (p.adj > 0.05, -1 <= log2FC <= 1)
Mm01G000657	102	90	87	23	38	17	89.0005	73.9254	55.8769	34.8098	42.1429	20.5235	52.7132	1.16386	0.0234301	0.091458	no_diff (p.adj > 0.05, -1 <= log2FC <= 1)
Mm01G000658	2263	1228	3717	1057	3895	4328	1974.59	1008.67	2387.29	1599.74	4319.65	5225.04	2752.5	-1.05322	0.06061	0.181747	no_diff (p.adj > 0.05, -1 <= log2FC <= 1)
Mm01G000659	369	465	771	256	261	150	321.973	381.948	495.185	387.448	289.455	181.09	342.85	0.484881	0.241809	0.460114	no_diff (p.adj > 0.05, -1 <= log2FC <= 1)
Mm01G000660	0	0	0	0	0	0	0	0	0	0	0	0	0	NA	NA	NA	no diff (express=0)
Mm01G000661	7	13	13	28	55	75	6.10788	10.6781	8.34942	42.3772	60.9963	90.5448	36.5089	-2.94843	1.71429e-06	3.74565e-05	down (p.adj < 0.05, log2FC <= -1)
Mm01G000662	23	22	24	0	54	16	20.0687	18.0707	15.4143	0	59.8873	19.3162	22.1262	-0.571345	0.666987	0.826948	no_diff (p.adj > 0.05, -1 <= log2FC <= 1)
Mm01G000663	131	169	384	83	220	267	114.305	138.815	246.629	125.618	243.985	322.34	198.615	-0.469472	0.377598	0.606056	no_diff (p.adj > 0.05, -1 <= log2FC <= 1)
Mm01G000664	0	0	2	0	0	0	0	0	1.28453	0	0	0	0.214088	0.917341	0.821271	NA	no_diff (p.adj > 0.05, -1 <= log2FC <= 1)
Mm01G000665	0	0	4	0	0	0	0	0	2.56905	0	0	0	0.428176	1.90008	0.633537	NA	no diff (express=0)
Mm01G000666	0	0	0	0	0	0	0	0	0	0	0	0	0	NA	NA	NA	no diff (express=0)
Mm01G000667	0	0	0	0	0	0	0	0	0	0	0	0	0	NA	NA	NA	no diff (express=0)
Mm01G000668	0	0	0	0	0	0	0	0	0	0	0	0	0	NA	NA	NA	no diff (express=0)
Mm01G000669	0	0	0	0	0	0	0	0	0	0	0	0	0	NA	NA	NA	no diff (express=0)
Mm01G000670	1	0	0	0	0	0	0.872554	0	0	0	0	0	0.145426	0.249044	0.951333	NA	no_diff (p.adj > 0.05, -1 <= log2FC <= 1)
Mm01G000671	0	0	0	0	0	0	0	0	0	0	0	0	0	NA	NA	NA	no diff (express=0)
Mm01G000672	0	0	0	0	0	0	0	0	0	0	0	0	0	NA	NA	NA	no diff (express=0)
Mm01G000673	5	12	7	1	0	0	4.36277	9.85672	4.49584	1.51347	0	0	3.37147	3.78088	0.0499962	NA	no diff (express=0)
Mm01G000674	27	79	86	5	2	8	23.559	64.8901	55.2346	7.56735	2.21805	9.65811	27.1879	2.90151	0.000572376	0.00501841	rich (p.adj < 0.05, log2FC >= 1)
Mm01G000675	394	389	503	167	241	288	343.786	319.522	323.058	252.75	267.275	347.692	309.014	0.183819	0.500677	0.709971	no_diff (p.adj > 0.05, -1 <= log2FC <= 1)
Mm01G000676	0	0	0	0	0	0	0	0	0	0	0	0	0	NA	NA	NA	no diff (express=0)
Mm01G000677	587	480	485	105	443	577	512.189	394.269	311.498	158.914	491.297	696.591	427.46	-0.146234	0.802864	0.905207	no_diff (p.adj > 0.05, -1 <= log2FC <= 1)
Mm01G000678	71	87	12	4	14	20	61.9513	71.4612	7.70716	6.05388	15.5263	24.1453	31.1409	1.6157	0.105431	0.268129	no_diff (p.adj > 0.05, -1 <= log2FC <= 1)
Mm01G000679	20	27	10	3	4	15	17.4511	22.1776	6.42263	4.54041	4.43609	18.109	12.1895	0.754545	0.465209	0.68144	no_diff (p.adj > 0.05, -1 <= log2FC <= 1)
Mm01G000680	44	52	7	4	5	18	38.3924	42.7125	4.49584	6.05388	5.54512	21.7308	19.8217	1.35331	0.219721	0.432888	no_diff (p.adj > 0.05, -1 <= log2FC <= 1)
Mm01G000681	102	196	39	6	18	72	89.0005	160.993	25.0483	9.08082	19.9624	86.923	65.168	1.2419	0.216495	0.428924	no_diff (p.adj > 0.05, -1 <= log2FC <= 1)
Mm01G000682	1057	834	1435	505	499	254	922.29	685.042	921.648	764.302	553.403	306.645	692.222	0.639568	0.136214	0.317615	no_diff (p.adj > 0.05, -1 <= log2FC <= 1)
Mm01G000683	0	0	0	0	0	0	0	0	0	0	0	0	0	NA	NA	NA	no diff (express=0)
Mm01G000684	0	0	0	0	0	0	0	0	0	0	0	0	0	NA	NA	NA	no diff (express=0)
Mm01G000685	0	0	0	0	0	0	0	0	0	0	0	0	0	NA	NA	NA	no diff (express=0)
Mm01G000686	0	0	0	0	0	0	0	0	0	0	0	0	0	NA	NA	NA	no diff (express=0)
Mm01G000687	0	0	0	0	0	0	0	0	0	0	0	0	0	NA	NA	NA	no diff (express=0)
Mm01G000688	0	0	0	0	0	0	0	0	0	0	0	0	0	NA	NA	NA	no diff (express=0)
Mm01G000689	0	0	0	0	0	0	0	0	0	0	0	0	0	NA	NA	NA	no diff (express=0)
Mm01G000690	0	0	0	0	0	0	0	0	0	0	0	0	0	NA	NA	NA	no diff (express=0)
Mm01G000691	0	0	0	0	0	0	0	0	0	0	0	0	0	NA	NA	NA	no diff (express=0)
Mm01G000692	0	0	0	0	0	0	0	0	0	0	0	0	0	NA	NA	NA	no diff (express=0)
Mm01G000693	0	0	0	0	0	0	0	0	0	0	0	0	0	NA	NA	NA	no diff (express=0)
Mm01G000694	0	0	0	0	0	0	0	0	0	0	0	0	0	NA	NA	NA	no diff (express=0)
Mm01G000695	39	269	50	611	663	784	34.0296	220.955	32.1132	924.73	735.283	946.495	482.268	-3.18344	4.58165e-05	0.000636187	down (p.adj < 0.05, log2FC <= -1)
Mm01G000696	657	214	179	81	300	292	573.268	175.778	114.965	122.591	332.707	352.521	278.638	0.0954573	0.896203	0.951849	no_diff (p.adj > 0.05, -1 <= log2FC <= 1)
Mm01G000697	0	0	0	0	0	3	0	0	0	0	0	3.62179	0.603632	-3.09473	0.438997	NA	no diff (express=0)
Mm01G000698	19	18	16	9	0	4	16.5785	14.7851	10.2762	13.6212	0	4.82906	10.015	1.20079	0.362606	0.590731	no_diff (p.adj > 0.05, -1 <= log2FC <= 1)
Mm01G000699	7	37	5	9	3	8	6.10788	30.3916	3.21132	13.6212	3.32707	9.65811	11.0529	0.584999	0.629115	0.803191	no_diff (p.adj > 0.05, -1 <= log2FC <= 1)
Mm01G000700	31	22	50	16	18	7	27.0492	18.0707	32.1132	24.2155	19.9624	8.45085	21.6436	0.5629	0.425635	0.648571	no_diff (p.adj > 0.05, -1 <= log2FC <= 1)
Mm01G000701	0	0	0	0	0	0	0	0	0	0	0	0	0	NA	NA	NA	no diff (express=0)
Mm01G000702	0	0	0	0	0	0	0	0	0	0	0	0	0	NA	NA	NA	no diff (express=0)
Mm01G000703	0	0	2	0	0	4	0	0	1.28453	0	0	4.82906	1.01893	-1.87805	0.634961	NA	no diff (express=0)
Mm01G000704	0	0	0	0	0	0	0	0	0	0	0	0	0	NA	NA	NA	no diff (express=0)
Mm01G000705	0	0	0	0	0	0	0	0	0	0	0	0	0	NA	NA	NA	no diff (express=0)
Mm01G000706	0	0	0	0	0	0	0	0	0	0	0	0	0	NA	NA	NA	no diff (express=0)
Mm01G000707	6	2	0	0	3	0	5.23533	1.64279	0	0	3.32707	0	1.70086	1.01136	0.745711	NA	no diff (express=0)
Mm01G000708	0	0	7	3	4	9	0	0	4.49584	4.54041	4.43609	10.8654	4.05629	-2.10132	0.291819	0.51874	no_diff (p.adj > 0.05, -1 <= log2FC <= 1)
Mm01G000709	19	32	35	10	14	16	16.5785	26.2846	22.4792	15.1347	15.5263	19.3162	19.2199	0.386326	0.529859	0.733302	no_diff (p.adj > 0.05, -1 <= log2FC <= 1)
Mm01G000710	0	0	0	0	0	0	0	0	0	0	0	0	0	NA	NA	NA	no diff (express=0)
Mm01G000711	0	0	0	0	0	0	0	0	0	0	0	0	0	NA	NA	NA	no diff (express=0)
Mm01G000712	7	8	12	46	8	7	6.10788	6.57115	7.70716	69.6196	8.87219	8.45085	17.8881	-2.07997	0.0558533	0.171213	no_diff (p.adj > 0.05, -1 <= log2FC <= 1)
Mm01G000713	2	6	4	0	0	2	1.74511	4.92836	2.56905	0	0	2.41453	1.94284	1.91047	0.391355	NA	no diff (express=0)
Mm01G000714	0	0	0	0	0	0	0	0	0	0	0	0	0	NA	NA	NA	no diff (express=0)
Mm01G000715	0	4	0	2	4	2	0	3.28557	0	3.02694	4.43609	2.41453	2.19386	-1.60572	0.480157	NA	no diff (express=0)
Mm01G000716	15	23	27	29	83	70	13.0883	18.892	17.3411	43.8906	92.049	84.5085	44.9616	-2.16237	7.92301e-05	0.00100591	down (p.adj < 0.05, log2FC <= -1)
Mm01G000717	0	0	0	0	0	0	0	0	0	0	0	0	0	NA	NA	NA	no diff (express=0)
Mm01G000718	0	0	0	0	0	0	0	0	0	0	0	0	0	NA	NA	NA	no diff (express=0)
Mm01G000719	21	16	31	9	25	7	18.3236	13.1423	19.9102	13.6212	27.7256	8.45085	16.8623	0.0389433	0.959827	0.981211	no_diff (p.adj > 0.05, -1 <= log2FC <= 1)
Mm01G000720	0	0	0	0	0	0	0	0	0	0	0	0	0	NA	NA	NA	no diff (express=0)
Mm01G000721	0	0	0	0	0	0	0	0	0	0	0	0	0	NA	NA	NA	no diff (express=0)
Mm01G000722	0	0	0	0	0	0	0	0	0	0	0	0	0	NA	NA	NA	no diff (express=0)
Mm01G000723	0	0	0	0	0	0	0	0	0	0	0	0	0	NA	NA	NA	no diff (express=0)
Mm01G000724	0	0	0	0	0	0	0	0	0	0	0	0	0	NA	NA	NA	no diff (express=0)
Mm01G000725	0	0	0	0	0	0	0	0	0	0	0	0	0	NA	NA	NA	no diff (express=0)
Mm01G000726	1	0	0	2	3	0	0.872554	0	0	3.02694	3.32707	0	1.20443	-2.93423	0.363329	NA	no diff (express=0)
Mm01G000727	10	10	17	4	0	2	8.72554	8.21393	10.9185	6.05388	0	2.41453	6.05439	1.77109	0.194164	0.40112	no_diff (p.adj > 0.05, -1 <= log2FC <= 1)
Mm01G000728	10	7	11	0	0	7	8.72554	5.74975	7.0649	0	0	8.45085	4.99851	1.33716	0.47665	0.69073	no_diff (p.adj > 0.05, -1 <= log2FC <= 1)
Mm01G000729	0	0	4	6	10	0	0	0	2.56905	9.08082	11.0902	0	3.79002	-2.92954	0.259837	0.482141	no_diff (p.adj > 0.05, -1 <= log2FC <= 1)
Mm01G000730	73	45	38	3	14	28	63.6965	36.9627	24.406	4.54041	15.5263	33.8034	29.8226	1.20311	0.167752	0.365006	no_diff (p.adj > 0.05, -1 <= log2FC <= 1)
Mm01G000731	0	0	0	0	0	0	0	0	0	0	0	0	0	NA	NA	NA	no diff (express=0)
Mm01G000732	0	0	0	0	0	0	0	0	0	0	0	0	0	NA	NA	NA	no diff (express=0)
Mm01G000733	92	588	105	1253	1357	1413	80.275	482.979	67.4376	1896.38	1504.95	1705.86	956.313	-3.01797	8.70465e-05	0.00108721	down (p.adj < 0.05, log2FC <= -1)
Mm01G000734	1137	849	507	268	860	924	992.094	697.363	325.628	405.61	953.76	1115.51	748.328	-0.297283	0.605997	0.78754	no_diff (p.adj > 0.05, -1 <= log2FC <= 1)
Mm01G000735	0	0	0	7	2	8	0	0	0	10.5943	2.21805	9.65811	3.74508	-5.7161	0.0108613	0.0512757	no_diff (p.adj > 0.05, -1 <= log2FC <= 1)
Mm01G000736	1377	1735	1062	760	252	415	1201.51	1425.12	682.084	1150.24	279.474	501.015	873.239	0.777849	0.196924	0.405001	no_diff (p.adj > 0.05, -1 <= log2FC <= 1)
Mm01G000737	21	44	83	31	36	17	18.3236	36.1413	53.3079	46.9176	39.9249	20.5235	35.8565	0.0134185	0.984138	0.992486	no_diff (p.adj > 0.05, -1 <= log2FC <= 1)
Mm01G000738	0	0	0	0	0	0	0	0	0	0	0	0	0	NA	NA	NA	no diff (express=0)
Mm01G000739	64	77	128	49	38	15	55.8435	63.2473	82.2097	74.16	42.1429	18.109	55.9521	0.591185	0.355519	0.583805	no_diff (p.adj > 0.05, -1 <= log2FC <= 1)
Mm01G000740	55	467	285	106	86	349	47.9905	383.591	183.045	160.428	95.376	421.335	215.294	-0.139779	0.868829	0.939305	no_diff (p.adj > 0.05, -1 <= log2FC <= 1)
Mm01G000741	0	0	0	0	0	0	0	0	0	0	0	0	0	NA	NA	NA	no diff (express=0)
Mm01G000742	173	140	55	2	12	46	150.952	114.995	35.3245	3.02694	13.3083	55.5342	62.1901	2.06108	0.0450781	0.146584	no_diff (p.adj > 0.05, -1 <= log2FC <= 1)
Mm01G000743	1121	1182	1638	361	795	647	978.133	970.887	1052.03	546.363	881.674	781.1	868.364	0.441036	0.131803	0.311224	no_diff (p.adj > 0.05, -1 <= log2FC <= 1)
Mm01G000744	0	0	0	0	0	0	0	0	0	0	0	0	0	NA	NA	NA	no diff (express=0)
Mm01G000745	9	12	34	78	18	26	7.85299	9.85672	21.837	118.051	19.9624	31.3889	34.8248	-2.08474	0.0218679	0.0867484	no_diff (p.adj > 0.05, -1 <= log2FC <= 1)
Mm01G000746	0	0	0	0	0	0	0	0	0	0	0	0	0	NA	NA	NA	no diff (express=0)
Mm01G000747	0	0	0	0	0	0	0	0	0	0	0	0	0	NA	NA	NA	no diff (express=0)
Mm01G000748	21	77	29	0	0	10	18.3236	63.2473	18.6256	0	0	12.0726	18.7115	3.04081	0.0580564	0.176077	no_diff (p.adj > 0.05, -1 <= log2FC <= 1)
Mm01G000749	30	33	27	27	8	49	26.1766	27.106	17.3411	40.8637	8.87219	59.1559	29.9193	-0.623822	0.447447	0.665824	no_diff (p.adj > 0.05, -1 <= log2FC <= 1)
Mm01G000750	0	0	0	0	0	0	0	0	0	0	0	0	0	NA	NA	NA	no diff (express=0)
Mm01G000751	0	0	0	0	0	0	0	0	0	0	0	0	0	NA	NA	NA	no diff (express=0)
Mm01G000752	337	513	848	297	453	454	294.051	421.375	544.639	449.501	502.388	548.098	460.009	-0.250885	0.468166	0.683875	no_diff (p.adj > 0.05, -1 <= log2FC <= 1)
Mm01G000753	4	0	2	0	0	0	3.49022	0	1.28453	0	0	0	0.795791	2.77071	0.483026	NA	no diff (express=0)
Mm01G000754	0	0	0	0	12	20	0	0	0	0	13.3083	24.1453	6.24226	-6.46044	0.019305	0.0793873	no_diff (p.adj > 0.05, -1 <= log2FC <= 1)
Mm01G000755	0	0	0	0	0	0	0	0	0	0	0	0	0	NA	NA	NA	no diff (express=0)
Mm01G000756	63	96	126	60	87	110	54.9709	78.8538	80.9252	90.8082	96.4851	132.799	89.1404	-0.575134	0.148195	0.335517	no_diff (p.adj > 0.05, -1 <= log2FC <= 1)
Mm01G000757	799	1139	2133	800	1049	985	697.171	935.567	1369.95	1210.78	1163.37	1189.16	1094.33	-0.246468	0.476792	0.690821	no_diff (p.adj > 0.05, -1 <= log2FC <= 1)
Mm01G000758	4116	3352	4957	595	944	673	3591.43	2753.31	3183.7	900.515	1046.92	812.489	2048.06	1.78736	1.2093e-12	1.06134e-10	rich (p.adj < 0.05, log2FC >= 1)
Mm01G000759	0	0	0	6	6	9	0	0	0	9.08082	6.65414	10.8654	4.43339	-5.96328	0.00281912	0.0179961	down (p.adj < 0.05, log2FC <= -1)
Mm01G000760	0	0	0	0	0	0	0	0	0	0	0	0	0	NA	NA	NA	no diff (express=0)
Mm01G000761	0	0	9	0	0	0	0	0	5.78037	0	0	0	0.963395	3.05895	0.43778	NA	no diff (express=0)
Mm01G000762	0	0	0	0	0	0	0	0	0	0	0	0	0	NA	NA	NA	no diff (express=0)
Mm01G000763	37	63	33	22	40	37	32.2845	51.7478	21.1947	33.2963	44.3609	44.6688	37.9255	-0.224334	0.696022	0.845429	no_diff (p.adj > 0.05, -1 <= log2FC <= 1)
Mm01G000764	72	51	113	18	22	9	62.8239	41.8911	72.5758	27.2425	24.3985	10.8654	39.9662	1.5114	0.0118386	0.0547429	no_diff (p.adj > 0.05, -1 <= log2FC <= 1)
Mm01G000765	456	474	584	201	383	259	397.885	389.34	375.082	304.207	424.756	312.681	367.325	0.156474	0.569975	0.762406	no_diff (p.adj > 0.05, -1 <= log2FC <= 1)
Mm01G000766	58	98	110	88	133	113	50.6081	80.4965	70.649	133.185	147.5	136.421	103.143	-1.04689	0.00356262	0.0215314	down (p.adj < 0.05, log2FC <= -1)
Mm01G000767	462	341	226	49	97	157	403.12	280.095	145.152	74.16	107.575	189.54	199.94	1.1552	0.0434405	0.143037	no_diff (p.adj > 0.05, -1 <= log2FC <= 1)
Mm01G000768	25	16	135	56	54	72	21.8139	13.1423	86.7055	84.7543	59.8873	86.923	58.8711	-0.922088	0.251823	0.472229	no_diff (p.adj > 0.05, -1 <= log2FC <= 1)
Mm01G000769	0	0	0	0	0	0	0	0	0	0	0	0	0	NA	NA	NA	no diff (express=0)
Mm01G000770	389	335	377	266	319	279	339.424	275.167	242.133	402.583	353.779	336.827	324.985	-0.35194	0.212082	0.423513	no_diff (p.adj > 0.05, -1 <= log2FC <= 1)
Mm01G000771	830	906	956	394	796	712	724.22	744.182	614.004	596.307	882.783	859.572	736.845	-0.16856	0.559917	0.755043	no_diff (p.adj > 0.05, -1 <= log2FC <= 1)
Mm01G000772	289	335	298	95	61	110	252.168	275.167	191.394	143.78	67.6504	132.799	177.16	1.06504	0.0139499	0.0619221	no_diff (p.adj > 0.05, -1 <= log2FC <= 1)
Mm01G000773	2246	2817	2866	1088	2978	2488	1959.76	2313.86	1840.73	1646.66	3302.67	3003.67	2344.56	-0.3796	0.299798	0.527599	no_diff (p.adj > 0.05, -1 <= log2FC <= 1)
Mm01G000774	728	689	596	213	324	371	635.219	565.94	382.789	322.369	359.324	447.895	452.256	0.486473	0.152428	0.342348	no_diff (p.adj > 0.05, -1 <= log2FC <= 1)
Mm01G000775	485	413	921	18	159	7	423.189	339.235	591.525	27.2425	176.335	8.45085	260.996	2.67154	0.00523115	0.0293092	rich (p.adj < 0.05, log2FC >= 1)
Mm01G000776	465	479	565	226	361	310	405.738	393.447	362.879	342.044	400.358	374.252	379.786	0.0559851	0.807778	0.906595	no_diff (p.adj > 0.05, -1 <= log2FC <= 1)
Mm01G000777	0	0	2	0	0	0	0	0	1.28453	0	0	0	0.214088	0.917341	0.821271	NA	no_diff (p.adj > 0.05, -1 <= log2FC <= 1)
Mm01G000778	2	0	0	1	0	0	1.74511	0	0	1.51347	0	0	0.543096	0.338636	0.932956	NA	no_diff (p.adj > 0.05, -1 <= log2FC <= 1)
Mm01G000779	0	0	0	0	0	0	0	0	0	0	0	0	0	NA	NA	NA	no diff (express=0)
Mm01G000780	0	0	0	0	0	0	0	0	0	0	0	0	0	NA	NA	NA	no diff (express=0)
Mm01G000781	3547	3885	5048	2736	2700	2193	3094.95	3191.11	3242.15	4140.85	2994.36	2647.53	3218.49	-0.0377822	0.892119	0.950019	no_diff (p.adj > 0.05, -1 <= log2FC <= 1)
Mm01G000782	148	23	2	0	5	3	129.138	18.892	1.28453	0	5.54512	3.62179	26.4136	3.99618	0.0132539	0.0596527	no_diff (p.adj > 0.05, -1 <= log2FC <= 1)
Mm01G000783	0	0	0	0	0	0	0	0	0	0	0	0	0	NA	NA	NA	no diff (express=0)
Mm01G000784	19	23	43	11	6	6	16.5785	18.892	27.6173	16.6482	6.65414	7.24359	15.6056	1.07281	0.167318	0.364306	no_diff (p.adj > 0.05, -1 <= log2FC <= 1)
Mm01G000785	0	0	0	0	0	0	0	0	0	0	0	0	0	NA	NA	NA	no diff (express=0)
Mm01G000786	0	0	0	4	0	0	0	0	0	6.05388	0	0	1.00898	-3.81253	0.336046	NA	no diff (express=0)
Mm01G000787	0	0	0	0	0	0	0	0	0	0	0	0	0	NA	NA	NA	no diff (express=0)
Mm01G000788	1183	99	356	912	4166	5498	1032.23	81.3179	228.646	1380.28	4620.19	6637.54	2330.04	-3.23541	0.000429957	0.00397775	down (p.adj < 0.05, log2FC <= -1)
Mm01G000789	4	0	7	20	14	9	3.49022	0	4.49584	30.2694	15.5263	10.8654	10.7745	-2.80495	0.0223012	0.0880266	no_diff (p.adj > 0.05, -1 <= log2FC <= 1)
Mm01G000790	273	269	349	174	284	288	238.207	220.955	224.15	263.344	314.963	347.692	268.218	-0.440133	0.0936771	0.247088	no_diff (p.adj > 0.05, -1 <= log2FC <= 1)
Mm01G000791	0	0	0	0	0	0	0	0	0	0	0	0	0	NA	NA	NA	no diff (express=0)
Mm01G000792	1089	961	1096	447	1082	952	950.212	789.359	703.921	676.521	1199.96	1149.32	911.549	-0.30924	0.375656	0.604089	no_diff (p.adj > 0.05, -1 <= log2FC <= 1)
Mm01G000793	1586	966	1929	505	1555	1090	1383.87	793.466	1238.93	764.302	1724.53	1315.92	1203.5	-0.155806	0.719357	0.859572	no_diff (p.adj > 0.05, -1 <= log2FC <= 1)
Mm01G000794	0	0	0	0	0	0	0	0	0	0	0	0	0	NA	NA	NA	no diff (express=0)
Mm01G000795	0	0	0	0	0	0	0	0	0	0	0	0	0	NA	NA	NA	no diff (express=0)
Mm01G000796	0	0	0	0	0	0	0	0	0	0	0	0	0	NA	NA	NA	no diff (express=0)
Mm01G000797	0	0	0	0	0	0	0	0	0	0	0	0	0	NA	NA	NA	no diff (express=0)
Mm01G000798	763	1229	1667	491	160	93	665.759	1009.49	1070.65	743.114	177.444	112.276	629.79	1.41221	0.0519217	0.162372	no_diff (p.adj > 0.05, -1 <= log2FC <= 1)
Mm01G000799	0	0	0	0	0	0	0	0	0	0	0	0	0	NA	NA	NA	no diff (express=0)
Mm01G000800	0	0	0	0	0	0	0	0	0	0	0	0	0	NA	NA	NA	no diff (express=0)
Mm01G000801	1223	955	847	352	794	902	1067.13	784.431	543.997	532.741	880.565	1088.95	816.303	-0.0636891	0.88325	0.946084	no_diff (p.adj > 0.05, -1 <= log2FC <= 1)
Mm01G000802	305	259	625	238	466	400	266.129	212.741	401.415	360.206	516.805	482.906	373.367	-0.62714	0.0996587	0.25814	no_diff (p.adj > 0.05, -1 <= log2FC <= 1)
Mm01G000803	0	0	0	0	0	0	0	0	0	0	0	0	0	NA	NA	NA	no diff (express=0)
Mm01G000804	880	60	217	607	1532	1659	767.848	49.2836	139.371	918.676	1699.02	2002.85	929.509	-2.27273	0.0116896	0.0542896	no_diff (p.adj > 0.05, -1 <= log2FC <= 1)
Mm01G000805	0	1	0	0	0	0	0	0.821393	0	0	0	0	0.136899	0.249044	0.951333	NA	no_diff (p.adj > 0.05, -1 <= log2FC <= 1)
Mm01G000806	82	69	92	64	140	111	71.5494	56.6761	59.0882	96.8621	155.263	134.006	95.5743	-1.04833	0.00585811	0.0320174	down (p.adj < 0.05, log2FC <= -1)
Mm01G000807	323	321	353	169	234	292	281.835	263.667	226.719	255.776	259.512	352.521	273.338	-0.169784	0.568237	0.761404	no_diff (p.adj > 0.05, -1 <= log2FC <= 1)
Mm01G000808	1133	1360	1478	555	665	639	988.604	1117.09	949.265	839.976	737.501	771.442	900.647	0.379511	0.0785397	0.218571	no_diff (p.adj > 0.05, -1 <= log2FC <= 1)
Mm01G000809	0	0	0	0	0	0	0	0	0	0	0	0	0	NA	NA	NA	no diff (express=0)
Mm01G000810	2	0	0	0	0	0	1.74511	0	0	0	0	0	0.290851	1.30041	0.746652	NA	no diff (express=0)
Mm01G000811	246	140	52	4	56	58	214.648	114.995	33.3977	6.05388	62.1053	70.0213	83.5369	1.38815	0.155835	0.347638	no_diff (p.adj > 0.05, -1 <= log2FC <= 1)
Mm01G000812	75	59	89	31	64	66	65.4416	48.4622	57.1614	46.9176	70.9775	79.6794	61.44	-0.213241	0.622988	0.79906	no_diff (p.adj > 0.05, -1 <= log2FC <= 1)
Mm01G000813	196	215	172	46	113	123	171.021	176.6	110.469	69.6196	125.32	148.493	133.587	0.410916	0.368821	0.597321	no_diff (p.adj > 0.05, -1 <= log2FC <= 1)
Mm01G000814	0	0	0	0	0	0	0	0	0	0	0	0	0	NA	NA	NA	no diff (express=0)
Mm01G000815	100	68	202	44	124	144	87.2554	55.8547	129.737	66.5927	137.519	173.846	108.468	-0.470833	0.404246	0.629331	no_diff (p.adj > 0.05, -1 <= log2FC <= 1)
Mm01G000816	306	444	437	164	179	187	267.002	364.699	280.669	248.209	198.515	225.758	264.142	0.441393	0.134	0.314361	no_diff (p.adj > 0.05, -1 <= log2FC <= 1)
Mm01G000817	46	56	83	24	7	23	40.1375	45.998	53.3079	36.3233	7.76317	27.7671	35.2161	0.969642	0.168622	0.366413	no_diff (p.adj > 0.05, -1 <= log2FC <= 1)
Mm01G000818	51	58	62	77	91	81	44.5003	47.6408	39.8203	116.537	100.921	97.7884	74.5347	-1.25655	0.00035948	0.00342632	down (p.adj < 0.05, log2FC <= -1)
Mm01G000819	4156	4547	7321	3347	10358	9054	3626.34	3734.88	4702.01	5065.58	11487.3	10930.6	6591.11	-1.18798	0.00363835	0.0218552	down (p.adj < 0.05, log2FC <= -1)
Mm01G000820	699	844	1078	381	905	954	609.915	693.256	692.36	576.632	1003.67	1151.73	787.927	-0.453798	0.207719	0.418156	no_diff (p.adj > 0.05, -1 <= log2FC <= 1)
Mm01G000821	65	129	376	248	617	1064	56.716	105.96	241.491	375.341	684.268	1284.53	458.051	-2.5345	0.000214724	0.00225108	down (p.adj < 0.05, log2FC <= -1)
Mm01G000822	34	56	159	78	237	329	29.6668	45.998	102.12	118.051	262.839	397.19	159.311	-2.12694	0.00156481	0.0112249	down (p.adj < 0.05, log2FC <= -1)
Mm01G000823	0	0	0	0	0	0	0	0	0	0	0	0	0	NA	NA	NA	no diff (express=0)
Mm01G000824	1639	2849	7222	3976	8659	12662	1430.12	2340.15	4638.43	6017.56	9603.04	15286.4	6552.61	-1.8779	0.000956232	0.00754428	down (p.adj < 0.05, log2FC <= -1)
Mm01G000825	0	0	0	0	0	0	0	0	0	0	0	0	0	NA	NA	NA	no diff (express=0)
Mm01G000826	0	0	0	0	0	0	0	0	0	0	0	0	0	NA	NA	NA	no diff (express=0)
Mm01G000827	0	0	0	0	0	0	0	0	0	0	0	0	0	NA	NA	NA	no diff (express=0)
Mm01G000828	0	0	0	0	0	0	0	0	0	0	0	0	0	NA	NA	NA	no diff (express=0)
Mm01G000829	0	0	0	0	0	0	0	0	0	0	0	0	0	NA	NA	NA	no diff (express=0)
Mm01G000830	647	184	60	58	87	98	564.543	151.136	38.5358	87.7813	96.4851	118.312	176.132	1.31661	0.13216	0.311833	no_diff (p.adj > 0.05, -1 <= log2FC <= 1)
Mm01G000831	845	253	57	65	114	107	737.308	207.813	36.609	98.3756	126.429	129.177	222.619	1.47071	0.107029	0.270562	no_diff (p.adj > 0.05, -1 <= log2FC <= 1)
Mm01G000832	5536	5381	4975	412	853	2153	4830.46	4419.92	3195.26	623.55	945.997	2599.24	2769.07	1.57773	0.00693199	0.0363982	rich (p.adj < 0.05, log2FC >= 1)
Mm01G000833	0	0	0	0	0	0	0	0	0	0	0	0	0	NA	NA	NA	no diff (express=0)
Mm01G000834	800	914	688	136	83	378	698.043	750.753	441.877	205.832	92.049	456.346	440.817	1.32572	0.0336489	0.119055	no_diff (p.adj > 0.05, -1 <= log2FC <= 1)
Mm01G000835	0	0	0	5	0	19	0	0	0	7.56735	0	22.938	5.08423	-6.16158	0.0372249	0.128119	no_diff (p.adj > 0.05, -1 <= log2FC <= 1)
Mm01G000836	4	6	0	4	0	0	3.49022	4.92836	0	6.05388	0	0	2.41208	0.496833	0.866802	NA	no_diff (p.adj > 0.05, -1 <= log2FC <= 1)
Mm01G000837	0	0	0	0	0	0	0	0	0	0	0	0	0	NA	NA	NA	no diff (express=0)
Mm01G000838	0	0	0	0	0	0	0	0	0	0	0	0	0	NA	NA	NA	no diff (express=0)
Mm01G000839	0	0	0	0	0	0	0	0	0	0	0	0	0	NA	NA	NA	no diff (express=0)
Mm01G000840	3	4	3	2	4	1	2.61766	3.28557	1.92679	3.02694	4.43609	1.20726	2.75005	-0.158149	0.910874	NA	no_diff (p.adj > 0.05, -1 <= log2FC <= 1)
Mm01G000841	1	162	11	52	116	388	0.872554	133.066	7.0649	78.7004	128.647	468.419	136.128	-2.26179	0.101581	0.261515	no_diff (p.adj > 0.05, -1 <= log2FC <= 1)
Mm01G000842	0	0	0	0	0	0	0	0	0	0	0	0	0	NA	NA	NA	no diff (express=0)
Mm01G000843	0	0	0	0	0	0	0	0	0	0	0	0	0	NA	NA	NA	no diff (express=0)
Mm01G000844	0	0	0	0	0	0	0	0	0	0	0	0	0	NA	NA	NA	no diff (express=0)
Mm01G000845	0	0	0	0	0	0	0	0	0	0	0	0	0	NA	NA	NA	no diff (express=0)
Mm01G000846	0	0	0	0	0	0	0	0	0	0	0	0	0	NA	NA	NA	no diff (express=0)
Mm01G000847	0	0	2	0	0	0	0	0	1.28453	0	0	0	0.214088	0.917341	0.821271	NA	no_diff (p.adj > 0.05, -1 <= log2FC <= 1)
Mm01G000848	11	2	0	15	0	5	9.5981	1.64279	0	22.7021	0	6.03632	6.66321	-1.35625	0.530251	0.733611	no_diff (p.adj > 0.05, -1 <= log2FC <= 1)
Mm01G000849	364	362	659	443	1586	2429	317.61	297.344	423.252	670.467	1758.91	2932.44	1066.67	-2.36859	2.90852e-05	0.000430257	down (p.adj < 0.05, log2FC <= -1)
Mm01G000850	0	0	0	0	0	0	0	0	0	0	0	0	0	NA	NA	NA	no diff (express=0)
Mm01G000851	0	0	0	0	0	0	0	0	0	0	0	0	0	NA	NA	NA	no diff (express=0)
Mm01G000852	0	0	0	0	0	0	0	0	0	0	0	0	0	NA	NA	NA	no diff (express=0)
Mm01G000853	0	0	0	0	0	0	0	0	0	0	0	0	0	NA	NA	NA	no diff (express=0)
Mm01G000854	0	0	0	0	0	0	0	0	0	0	0	0	0	NA	NA	NA	no diff (express=0)
Mm01G000855	165	121	146	128	218	251	143.971	99.3886	93.7704	193.724	241.767	303.023	179.274	-1.13441	0.002408	0.0158557	down (p.adj < 0.05, log2FC <= -1)
Mm01G000856	0	0	0	0	0	0	0	0	0	0	0	0	0	NA	NA	NA	no diff (express=0)
Mm01G000857	0	0	0	0	0	0	0	0	0	0	0	0	0	NA	NA	NA	no diff (express=0)
Mm01G000858	0	0	0	0	0	0	0	0	0	0	0	0	0	NA	NA	NA	no diff (express=0)
Mm01G000859	0	0	0	0	2	3	0	0	0	0	2.21805	3.62179	0.973307	-3.78401	0.339809	NA	no diff (express=0)
Mm01G000860	0	0	0	0	0	0	0	0	0	0	0	0	0	NA	NA	NA	no diff (express=0)
Mm01G000861	0	0	0	0	0	0	0	0	0	0	0	0	0	NA	NA	NA	no diff (express=0)
Mm01G000862	0	3	2	3	5	2	0	2.46418	1.28453	4.54041	5.54512	2.41453	2.70813	-1.72856	0.305306	NA	no diff (express=0)
Mm01G000863	0	0	0	0	0	0	0	0	0	0	0	0	0	NA	NA	NA	no diff (express=0)
Mm01G000864	0	0	0	0	0	0	0	0	0	0	0	0	0	NA	NA	NA	no diff (express=0)
Mm01G000865	0	0	0	0	0	0	0	0	0	0	0	0	0	NA	NA	NA	no diff (express=0)
Mm01G000866	0	0	0	0	0	0	0	0	0	0	0	0	0	NA	NA	NA	no diff (express=0)
Mm01G000867	0	0	0	0	0	0	0	0	0	0	0	0	0	NA	NA	NA	no diff (express=0)
Mm01G000868	0	0	0	0	0	0	0	0	0	0	0	0	0	NA	NA	NA	no diff (express=0)
Mm01G000869	32	52	42	97	311	206	27.9217	42.7125	26.9751	146.807	344.906	248.696	139.67	-2.92709	2.57112e-09	1.18808e-07	down (p.adj < 0.05, log2FC <= -1)
Mm01G000870	19	17	73	35	136	124	16.5785	13.9637	46.8852	52.9715	150.827	149.701	71.8211	-2.18504	0.00253954	0.0165304	down (p.adj < 0.05, log2FC <= -1)
Mm01G000871	83	165	169	111	297	330	72.422	135.53	108.543	167.995	329.38	398.397	202.044	-1.50176	0.00198655	0.0135869	down (p.adj < 0.05, log2FC <= -1)
Mm01G000872	517	647	827	400	369	348	451.111	531.441	531.152	605.388	409.23	420.128	491.408	0.0790054	0.790416	0.898142	no_diff (p.adj > 0.05, -1 <= log2FC <= 1)
Mm01G000873	519	641	915	429	358	346	452.856	526.513	587.671	649.279	397.03	417.713	505.177	0.0998974	0.764673	0.884924	no_diff (p.adj > 0.05, -1 <= log2FC <= 1)
Mm01G000874	241	231	395	94	51	43	210.286	189.742	253.694	142.266	56.5602	51.9124	150.743	1.3898	0.00807718	0.0410434	rich (p.adj < 0.05, log2FC >= 1)
Mm01G000875	179	289	252	102	266	272	156.187	237.383	161.85	154.374	295	328.376	222.195	-0.487834	0.265012	0.488039	no_diff (p.adj > 0.05, -1 <= log2FC <= 1)
Mm01G000876	417	485	539	111	230	205	363.855	398.376	346.18	167.995	255.075	247.489	296.495	0.722063	0.0179591	0.0752125	no_diff (p.adj > 0.05, -1 <= log2FC <= 1)
Mm01G000877	59	139	431	48	23	98	51.4807	114.174	276.815	72.6466	25.5075	118.312	109.823	1.03368	0.20321	0.41254	no_diff (p.adj > 0.05, -1 <= log2FC <= 1)
Mm01G000878	2	0	0	6	0	6	1.74511	0	0	9.08082	0	7.24359	3.01159	-3.26115	0.231156	NA	no diff (express=0)
Mm01G000879	0	0	0	0	0	0	0	0	0	0	0	0	0	NA	NA	NA	no diff (express=0)
Mm01G000880	0	0	0	0	0	0	0	0	0	0	0	0	0	NA	NA	NA	no diff (express=0)
Mm01G000881	0	0	0	0	0	0	0	0	0	0	0	0	0	NA	NA	NA	no diff (express=0)
Mm01G000882	4	9	11	12	2	6	3.49022	7.39254	7.0649	18.1616	2.21805	7.24359	7.59515	-0.596895	0.602732	0.785639	no_diff (p.adj > 0.05, -1 <= log2FC <= 1)
Mm01G000883	0	0	0	0	0	0	0	0	0	0	0	0	0	NA	NA	NA	no diff (express=0)
Mm01G000884	0	0	0	0	0	0	0	0	0	0	0	0	0	NA	NA	NA	no diff (express=0)
Mm01G000885	0	0	0	0	0	0	0	0	0	0	0	0	0	NA	NA	NA	no diff (express=0)
Mm01G000886	18	16	19	11	35	30	15.706	13.1423	12.203	16.6482	38.8158	36.2179	22.1222	-1.17084	0.0723287	0.206111	no_diff (p.adj > 0.05, -1 <= log2FC <= 1)
Mm01G000887	93	57	54	34	51	57	81.1475	46.8194	34.6822	51.458	56.5602	68.8141	56.5802	-0.126142	0.80971	0.907706	no_diff (p.adj > 0.05, -1 <= log2FC <= 1)
Mm01G000888	0	0	0	0	0	0	0	0	0	0	0	0	0	NA	NA	NA	no diff (express=0)
Mm01G000889	0	0	0	0	0	0	0	0	0	0	0	0	0	NA	NA	NA	no diff (express=0)
Mm01G000890	180	291	299	67	80	140	157.06	239.025	192.037	101.402	88.7219	169.017	157.877	0.711067	0.0927433	0.245308	no_diff (p.adj > 0.05, -1 <= log2FC <= 1)
Mm01G000891	3	0	1	0	0	0	2.61766	0	0.642263	0	0	0	0.543321	2.21686	0.576576	NA	no diff (express=0)
Mm01G000892	0	0	0	0	0	0	0	0	0	0	0	0	0	NA	NA	NA	no diff (express=0)
Mm01G000893	57	7	82	27	48	44	49.7356	5.74975	52.6656	40.8637	53.2331	53.1196	42.5612	-0.444368	0.60228	0.785406	no_diff (p.adj > 0.05, -1 <= log2FC <= 1)
Mm01G000894	0	0	0	0	0	0	0	0	0	0	0	0	0	NA	NA	NA	no diff (express=0)
Mm01G000895	0	2	4	0	0	0	0	1.64279	2.56905	0	0	0	0.701973	2.59895	0.511144	NA	no diff (express=0)
Mm01G000896	0	0	0	0	0	0	0	0	0	0	0	0	0	NA	NA	NA	no diff (express=0)
Mm01G000897	0	0	0	0	0	0	0	0	0	0	0	0	0	NA	NA	NA	no diff (express=0)
Mm01G000898	0	0	0	0	0	0	0	0	0	0	0	0	0	NA	NA	NA	no diff (express=0)
Mm01G000899	17	2	7	5	13	0	14.8334	1.64279	4.49584	7.56735	14.4173	0	7.15945	-0.075517	0.962727	0.982793	no_diff (p.adj > 0.05, -1 <= log2FC <= 1)
Mm01G000900	277	245	379	64	661	259	241.698	201.241	243.418	96.8621	733.065	312.681	304.827	-0.736386	0.292817	0.519985	no_diff (p.adj > 0.05, -1 <= log2FC <= 1)
Mm01G000901	173	195	260	80	219	197	150.952	160.172	166.988	121.078	242.876	237.831	179.983	-0.334501	0.404172	0.629284	no_diff (p.adj > 0.05, -1 <= log2FC <= 1)
Mm01G000902	167	153	273	71	119	139	145.717	125.673	175.338	107.456	131.974	167.81	142.328	0.13245	0.711854	0.855599	no_diff (p.adj > 0.05, -1 <= log2FC <= 1)
Mm01G000903	370	396	455	266	313	193	322.845	325.272	292.23	402.583	347.124	233.002	320.509	-0.0626537	0.848991	0.927701	no_diff (p.adj > 0.05, -1 <= log2FC <= 1)
Mm01G000904	0	0	0	0	0	0	0	0	0	0	0	0	0	NA	NA	NA	no diff (express=0)
Mm01G000905	0	0	0	0	0	0	0	0	0	0	0	0	0	NA	NA	NA	no diff (express=0)
Mm01G000906	0	0	0	0	0	0	0	0	0	0	0	0	0	NA	NA	NA	no diff (express=0)
Mm01G000907	0	0	0	0	0	0	0	0	0	0	0	0	0	NA	NA	NA	no diff (express=0)
Mm01G000908	0	0	0	0	0	0	0	0	0	0	0	0	0	NA	NA	NA	no diff (express=0)
Mm01G000909	6	2	2	2	3	5	5.23533	1.64279	1.28453	3.02694	3.32707	6.03632	3.4255	-0.6264	0.646642	NA	no_diff (p.adj > 0.05, -1 <= log2FC <= 1)
Mm01G000910	0	0	0	0	0	0	0	0	0	0	0	0	0	NA	NA	NA	no diff (express=0)
Mm01G000911	0	0	0	0	0	0	0	0	0	0	0	0	0	NA	NA	NA	no diff (express=0)
Mm01G000912	0	0	0	0	0	0	0	0	0	0	0	0	0	NA	NA	NA	no diff (express=0)
Mm01G000913	429	451	449	76	66	141	374.326	370.448	288.376	115.024	73.1956	170.224	231.932	1.52767	0.000347992	0.00334072	rich (p.adj < 0.05, log2FC >= 1)
Mm01G000914	0	0	0	0	0	0	0	0	0	0	0	0	0	NA	NA	NA	no diff (express=0)
Mm01G000915	0	0	0	0	0	0	0	0	0	0	0	0	0	NA	NA	NA	no diff (express=0)
Mm01G000916	0	0	0	0	0	0	0	0	0	0	0	0	0	NA	NA	NA	no diff (express=0)
Mm01G000917	0	0	0	0	0	0	0	0	0	0	0	0	0	NA	NA	NA	no diff (express=0)
Mm01G000918	0	0	0	0	0	0	0	0	0	0	0	0	0	NA	NA	NA	no diff (express=0)
Mm01G000919	0	0	0	0	0	0	0	0	0	0	0	0	0	NA	NA	NA	no diff (express=0)
Mm01G000920	0	0	0	0	0	0	0	0	0	0	0	0	0	NA	NA	NA	no diff (express=0)
Mm01G000921	0	0	0	0	0	0	0	0	0	0	0	0	0	NA	NA	NA	no diff (express=0)
Mm01G000922	0	0	0	0	0	0	0	0	0	0	0	0	0	NA	NA	NA	no diff (express=0)
Mm01G000923	0	0	0	0	0	0	0	0	0	0	0	0	0	NA	NA	NA	no diff (express=0)
Mm01G000924	0	0	0	0	0	0	0	0	0	0	0	0	0	NA	NA	NA	no diff (express=0)
Mm01G000925	0	0	0	0	0	0	0	0	0	0	0	0	0	NA	NA	NA	no diff (express=0)
Mm01G000926	0	0	0	0	0	0	0	0	0	0	0	0	0	NA	NA	NA	no diff (express=0)
Mm01G000927	0	0	0	0	0	0	0	0	0	0	0	0	0	NA	NA	NA	no diff (express=0)
Mm01G000928	0	0	0	0	0	0	0	0	0	0	0	0	0	NA	NA	NA	no diff (express=0)
Mm01G000929	0	0	0	0	0	0	0	0	0	0	0	0	0	NA	NA	NA	no diff (express=0)
Mm01G000930	0	0	0	0	0	0	0	0	0	0	0	0	0	NA	NA	NA	no diff (express=0)
Mm01G000931	0	0	0	0	0	0	0	0	0	0	0	0	0	NA	NA	NA	no diff (express=0)
Mm01G000932	0	0	0	0	0	0	0	0	0	0	0	0	0	NA	NA	NA	no diff (express=0)
Mm01G000933	0	0	0	0	0	0	0	0	0	0	0	0	0	NA	NA	NA	no diff (express=0)
Mm01G000934	0	0	0	0	0	0	0	0	0	0	0	0	0	NA	NA	NA	no diff (express=0)
Mm01G000935	0	0	0	0	0	0	0	0	0	0	0	0	0	NA	NA	NA	no diff (express=0)
Mm01G000936	0	0	0	0	0	0	0	0	0	0	0	0	0	NA	NA	NA	no diff (express=0)
Mm01G000937	0	0	0	0	0	0	0	0	0	0	0	0	0	NA	NA	NA	no diff (express=0)
Mm01G000938	0	0	0	0	0	0	0	0	0	0	0	0	0	NA	NA	NA	no diff (express=0)
Mm01G000939	0	0	0	0	0	0	0	0	0	0	0	0	0	NA	NA	NA	no diff (express=0)
Mm01G000940	0	0	0	0	0	0	0	0	0	0	0	0	0	NA	NA	NA	no diff (express=0)
Mm01G000941	0	0	0	0	0	0	0	0	0	0	0	0	0	NA	NA	NA	no diff (express=0)
Mm01G000942	0	0	0	0	0	0	0	0	0	0	0	0	0	NA	NA	NA	no diff (express=0)
Mm01G000943	0	0	0	0	0	0	0	0	0	0	0	0	0	NA	NA	NA	no diff (express=0)
Mm01G000944	0	0	0	0	0	0	0	0	0	0	0	0	0	NA	NA	NA	no diff (express=0)
Mm01G000945	0	0	0	0	0	0	0	0	0	0	0	0	0	NA	NA	NA	no diff (express=0)
Mm01G000946	0	0	0	0	0	0	0	0	0	0	0	0	0	NA	NA	NA	no diff (express=0)
Mm01G000947	0	0	6	0	5	3	0	0	3.85358	0	5.54512	3.62179	2.17008	-1.23602	0.672878	NA	no diff (express=0)
Mm01G000948	0	0	0	0	0	0	0	0	0	0	0	0	0	NA	NA	NA	no diff (express=0)
Mm01G000949	0	0	9	0	0	0	0	0	5.78037	0	0	0	0.963395	3.05895	0.43778	NA	no diff (express=0)
Mm01G000950	0	0	0	0	0	0	0	0	0	0	0	0	0	NA	NA	NA	no diff (express=0)
Mm01G000951	0	0	0	0	0	0	0	0	0	0	0	0	0	NA	NA	NA	no diff (express=0)
Mm01G000952	0	0	0	0	0	0	0	0	0	0	0	0	0	NA	NA	NA	no diff (express=0)
Mm01G000953	1	3	1	4	0	0	0.872554	2.46418	0.642263	6.05388	0	0	1.67215	-0.575358	0.823617	NA	no_diff (p.adj > 0.05, -1 <= log2FC <= 1)
Mm01G000954	1	0	0	0	0	0	0.872554	0	0	0	0	0	0.145426	0.249044	0.951333	NA	no_diff (p.adj > 0.05, -1 <= log2FC <= 1)
Mm01G000955	0	0	0	0	0	0	0	0	0	0	0	0	0	NA	NA	NA	no diff (express=0)
Mm01G000956	0	0	0	0	0	0	0	0	0	0	0	0	0	NA	NA	NA	no diff (express=0)
Mm01G000957	0	0	0	0	0	0	0	0	0	0	0	0	0	NA	NA	NA	no diff (express=0)
Mm01G000958	0	0	0	0	0	0	0	0	0	0	0	0	0	NA	NA	NA	no diff (express=0)
Mm01G000959	0	0	0	0	0	0	0	0	0	0	0	0	0	NA	NA	NA	no diff (express=0)
Mm01G000960	0	0	0	0	0	0	0	0	0	0	0	0	0	NA	NA	NA	no diff (express=0)
Mm01G000961	6	4	4	0	6	4	5.23533	3.28557	2.56905	0	6.65414	4.82906	3.76219	-0.0828464	0.956633	0.979942	no_diff (p.adj > 0.05, -1 <= log2FC <= 1)
Mm01G000962	4	18	72	109	42	26	3.49022	14.7851	46.243	164.968	46.579	31.3889	51.2424	-1.90312	0.0690819	0.199489	no_diff (p.adj > 0.05, -1 <= log2FC <= 1)
Mm01G000963	1	0	0	0	0	0	0.872554	0	0	0	0	0	0.145426	0.249044	0.951333	NA	no_diff (p.adj > 0.05, -1 <= log2FC <= 1)
Mm01G000964	31	32	96	113	20	13	27.0492	26.2846	61.6573	171.022	22.1805	15.6944	53.9813	-0.854322	0.397827	0.6236	no_diff (p.adj > 0.05, -1 <= log2FC <= 1)
Mm01G000965	0	0	0	0	0	0	0	0	0	0	0	0	0	NA	NA	NA	no diff (express=0)
Mm01G000966	23	7	45	42	6	0	20.0687	5.74975	28.9018	63.5657	6.65414	0	20.8234	-0.351305	0.821803	0.913487	no_diff (p.adj > 0.05, -1 <= log2FC <= 1)
Mm01G000967	0	0	0	0	0	0	0	0	0	0	0	0	0	NA	NA	NA	no diff (express=0)
Mm01G000968	0	0	0	0	0	0	0	0	0	0	0	0	0	NA	NA	NA	no diff (express=0)
Mm01G000969	0	0	0	0	0	0	0	0	0	0	0	0	0	NA	NA	NA	no diff (express=0)
Mm01G000970	40	36	124	73	69	7	34.9022	29.5702	79.6407	110.483	76.5226	8.45085	56.595	-0.435267	0.64173	0.811388	no_diff (p.adj > 0.05, -1 <= log2FC <= 1)
Mm01G000971	300	275	307	116	128	191	261.766	225.883	197.175	175.563	141.955	230.587	205.488	0.320789	0.351213	0.579213	no_diff (p.adj > 0.05, -1 <= log2FC <= 1)
Mm01G000972	102	227	281	48	23	11	89.0005	186.456	180.476	72.6466	25.5075	13.2799	94.5611	2.04368	0.00499089	0.0282659	rich (p.adj < 0.05, log2FC >= 1)
Mm01G000973	185	304	463	134	214	210	161.423	249.704	297.368	202.805	237.331	253.525	233.693	0.0310091	0.93253	0.968333	no_diff (p.adj > 0.05, -1 <= log2FC <= 1)
Mm01G000974	548	740	887	873	1790	1745	478.16	607.831	569.688	1321.26	1985.15	2106.68	1178.13	-1.70923	3.11015e-08	1.11581e-06	down (p.adj < 0.05, log2FC <= -1)
Mm01G000975	6	26	13	13	25	14	5.23533	21.3562	8.34942	19.6751	27.7256	16.9017	16.5406	-0.884303	0.291806	0.51874	no_diff (p.adj > 0.05, -1 <= log2FC <= 1)
Mm01G000976	0	0	0	0	0	0	0	0	0	0	0	0	0	NA	NA	NA	no diff (express=0)
Mm01G000977	0	0	0	0	0	0	0	0	0	0	0	0	0	NA	NA	NA	no diff (express=0)
Mm01G000978	3	8	5	4	6	8	2.61766	6.57115	3.21132	6.05388	6.65414	9.65811	5.79438	-0.857949	0.415143	0.638422	no_diff (p.adj > 0.05, -1 <= log2FC <= 1)
Mm01G000979	0	0	0	0	0	0	0	0	0	0	0	0	0	NA	NA	NA	no diff (express=0)
Mm01G000980	0	0	0	0	0	0	0	0	0	0	0	0	0	NA	NA	NA	no diff (express=0)
Mm01G000981	0	0	0	0	0	0	0	0	0	0	0	0	0	NA	NA	NA	no diff (express=0)
Mm01G000982	0	0	0	0	0	0	0	0	0	0	0	0	0	NA	NA	NA	no diff (express=0)
Mm01G000983	128	36	239	91	115	42	111.687	29.5702	153.501	137.726	127.538	50.7051	101.788	-0.0982054	0.893599	0.950505	no_diff (p.adj > 0.05, -1 <= log2FC <= 1)
Mm01G000984	0	0	0	0	23	26	0	0	0	0	25.5075	31.3889	9.48274	-7.06332	0.00587184	0.0320593	down (p.adj < 0.05, log2FC <= -1)
Mm01G000985	122	126	129	42	69	40	106.452	103.496	82.852	63.5657	76.5226	48.2906	80.1963	0.633587	0.10773	0.271757	no_diff (p.adj > 0.05, -1 <= log2FC <= 1)
Mm01G000986	361	232	335	67	64	70	314.992	190.563	215.158	101.402	70.9775	84.5085	162.934	1.49125	0.000100353	0.00122323	rich (p.adj < 0.05, log2FC >= 1)
Mm01G000987	133	169	232	59	69	99	116.05	138.815	149.005	89.2947	76.5226	119.519	114.868	0.502319	0.166936	0.363806	no_diff (p.adj > 0.05, -1 <= log2FC <= 1)
Mm01G000988	697	544	583	277	320	373	608.17	446.838	374.44	419.231	354.888	450.31	442.313	0.222961	0.48716	0.699549	no_diff (p.adj > 0.05, -1 <= log2FC <= 1)
Mm01G000989	408	328	613	186	284	288	356.002	269.417	393.707	281.505	314.963	347.692	327.214	0.110059	0.710422	0.855112	no_diff (p.adj > 0.05, -1 <= log2FC <= 1)
Mm01G000990	0	0	0	0	0	0	0	0	0	0	0	0	0	NA	NA	NA	no diff (express=0)
Mm01G000991	1060	1119	1433	288	487	427	924.907	919.139	920.363	435.879	540.095	515.502	709.314	0.888992	5.71914e-05	0.000766283	no_diff (p.adj > 0.05, -1 <= log2FC <= 1)
Mm01G000992	354	370	431	291	539	499	308.884	303.916	276.815	440.42	597.764	602.425	421.704	-0.884564	0.00103472	0.00806142	no_diff (p.adj > 0.05, -1 <= log2FC <= 1)
Mm01G000993	316	479	548	248	256	191	275.727	393.447	351.96	375.341	283.91	230.587	318.495	0.200443	0.557955	0.753823	no_diff (p.adj > 0.05, -1 <= log2FC <= 1)
Mm01G000994	0	0	0	0	0	0	0	0	0	0	0	0	0	NA	NA	NA	no diff (express=0)
Mm01G000995	0	0	0	0	0	0	0	0	0	0	0	0	0	NA	NA	NA	no diff (express=0)
Mm01G000996	1123	1284	1719	455	442	520	979.878	1054.67	1104.05	688.629	490.188	627.777	824.199	0.798007	0.00188635	0.0130134	no_diff (p.adj > 0.05, -1 <= log2FC <= 1)
Mm01G000997	0	0	0	0	0	0	0	0	0	0	0	0	0	NA	NA	NA	no diff (express=0)
Mm01G000998	408	475	576	365	842	639	356.002	390.162	369.944	552.417	933.798	771.442	562.294	-1.0173	0.00103886	0.00808401	down (p.adj < 0.05, log2FC <= -1)
Mm01G000999	3216	2427	2101	730	1243	692	2806.13	1993.52	1349.4	1104.83	1378.52	835.427	1577.97	0.88946	0.0270117	0.101696	no_diff (p.adj > 0.05, -1 <= log2FC <= 1)
Mm01G001000	887	1467	2978	1889	5324	4389	773.956	1204.98	1912.66	2858.94	5904.44	5298.68	2992.28	-1.85323	0.000116645	0.00138042	down (p.adj < 0.05, log2FC <= -1)
Mm01G001001	66	106	155	64	98	122	57.5886	87.0677	99.5508	96.8621	108.684	147.286	99.5066	-0.529776	0.206766	0.416942	no_diff (p.adj > 0.05, -1 <= log2FC <= 1)
Mm01G001002	1211	1333	2018	653	968	705	1056.66	1094.92	1296.09	988.296	1073.53	851.121	1060.1	0.243352	0.313989	0.542444	no_diff (p.adj > 0.05, -1 <= log2FC <= 1)
Mm01G001003	611	599	759	249	566	408	533.131	492.015	487.478	376.854	627.707	492.564	501.625	0.0133191	0.965332	0.983878	no_diff (p.adj > 0.05, -1 <= log2FC <= 1)
Mm01G001004	745	898	967	256	593	585	650.053	737.611	621.069	387.448	657.651	706.25	626.68	0.196614	0.567067	0.760724	no_diff (p.adj > 0.05, -1 <= log2FC <= 1)
Mm01G001005	918	697	919	315	529	387	801.005	572.511	590.24	476.743	586.673	467.211	582.397	0.35859	0.213509	0.425298	no_diff (p.adj > 0.05, -1 <= log2FC <= 1)
Mm01G001006	795	862	916	541	635	626	693.681	708.041	588.313	818.787	704.23	755.747	711.467	-0.19538	0.391437	0.617768	no_diff (p.adj > 0.05, -1 <= log2FC <= 1)
Mm01G001007	0	0	3	0	0	0	0	0	1.92679	0	0	0	0.321132	1.49114	0.71006	NA	no diff (express=0)
Mm01G001008	0	0	0	0	0	0	0	0	0	0	0	0	0	NA	NA	NA	no diff (express=0)
Mm01G001009	885	1588	1146	654	982	1176	772.21	1304.37	736.034	989.809	1089.06	1419.74	1051.87	-0.315193	0.39114	0.617454	no_diff (p.adj > 0.05, -1 <= log2FC <= 1)
Mm01G001010	81	67	12	0	0	3	70.6769	55.0334	7.70716	0	0	3.62179	22.8399	5.16899	0.000588707	0.00514092	rich (p.adj < 0.05, log2FC >= 1)
Mm01G001011	186	104	11	0	0	44	162.295	85.4249	7.0649	0	0	53.1196	51.3174	2.25933	0.230818	0.446345	no_diff (p.adj > 0.05, -1 <= log2FC <= 1)
Mm01G001012	8	3	3	0	0	0	6.98043	2.46418	1.92679	0	0	0	1.89523	4.02139	0.129072	NA	no diff (express=0)
Mm01G001013	0	0	0	2	0	4	0	0	0	3.02694	0	4.82906	1.30933	-4.20198	0.287405	NA	no diff (express=0)
Mm01G001014	129	509	62	54	17	45	112.559	418.089	39.8203	81.7274	18.8534	54.3269	120.896	1.88379	0.0425673	0.140943	no_diff (p.adj > 0.05, -1 <= log2FC <= 1)
Mm01G001015	7	35	9	1	0	3	6.10788	28.7488	5.78037	1.51347	0	3.62179	7.62871	2.99232	0.0488447	0.155374	no_diff (p.adj > 0.05, -1 <= log2FC <= 1)
Mm01G001016	0	0	0	0	0	0	0	0	0	0	0	0	0	NA	NA	NA	no diff (express=0)
Mm01G001017	0	0	0	0	0	0	0	0	0	0	0	0	0	NA	NA	NA	no diff (express=0)
Mm01G001018	0	0	0	0	0	0	0	0	0	0	0	0	0	NA	NA	NA	no diff (express=0)
Mm01G001019	0	0	0	0	0	0	0	0	0	0	0	0	0	NA	NA	NA	no diff (express=0)
Mm01G001020	0	0	0	0	0	0	0	0	0	0	0	0	0	NA	NA	NA	no diff (express=0)
Mm01G001021	0	0	0	0	0	0	0	0	0	0	0	0	0	NA	NA	NA	no diff (express=0)
Mm01G001022	0	0	0	0	0	0	0	0	0	0	0	0	0	NA	NA	NA	no diff (express=0)
Mm01G001023	0	0	0	0	0	4	0	0	0	0	0	4.82906	0.804843	-3.50812	0.377625	NA	no diff (express=0)
Mm01G001024	0	0	0	0	0	0	0	0	0	0	0	0	0	NA	NA	NA	no diff (express=0)
Mm01G001025	0	0	0	0	0	0	0	0	0	0	0	0	0	NA	NA	NA	no diff (express=0)
Mm01G001026	0	0	0	0	0	0	0	0	0	0	0	0	0	NA	NA	NA	no diff (express=0)
Mm01G001027	0	0	0	0	0	0	0	0	0	0	0	0	0	NA	NA	NA	no diff (express=0)
Mm01G001028	0	0	0	0	0	0	0	0	0	0	0	0	0	NA	NA	NA	no diff (express=0)
Mm01G001029	7	13	0	8	15	26	6.10788	10.6781	0	12.1078	16.6354	31.3889	12.8197	-1.85494	0.167132	0.364051	no_diff (p.adj > 0.05, -1 <= log2FC <= 1)
Mm01G001030	0	0	0	0	0	0	0	0	0	0	0	0	0	NA	NA	NA	no diff (express=0)
Mm01G001031	0	0	0	0	0	0	0	0	0	0	0	0	0	NA	NA	NA	no diff (express=0)
Mm01G001032	0	0	0	0	0	0	0	0	0	0	0	0	0	NA	NA	NA	no diff (express=0)
Mm01G001033	0	0	0	0	0	0	0	0	0	0	0	0	0	NA	NA	NA	no diff (express=0)
Mm01G001034	0	0	0	0	0	0	0	0	0	0	0	0	0	NA	NA	NA	no diff (express=0)
Mm01G001035	28	41	60	0	0	0	24.4315	33.6771	38.5358	0	0	0	16.1074	7.11393	1.37492e-06	3.08402e-05	rich (p.adj < 0.05, log2FC >= 1)
Mm01G001036	112	110	149	46	89	57	97.7261	90.3533	95.6972	69.6196	98.7031	68.8141	86.8189	0.25529	0.479438	0.693242	no_diff (p.adj > 0.05, -1 <= log2FC <= 1)
Mm01G001037	7	5	13	2	3	6	6.10788	4.10697	8.34942	3.02694	3.32707	7.24359	5.36031	0.447644	0.685154	0.837988	no_diff (p.adj > 0.05, -1 <= log2FC <= 1)
Mm01G001038	38	45	54	17	32	30	33.1571	36.9627	34.6822	25.729	35.4888	36.2179	33.7063	0.0991027	0.83435	0.920281	no_diff (p.adj > 0.05, -1 <= log2FC <= 1)
Mm01G001039	178	167	304	67	136	138	155.315	137.173	195.248	101.402	150.827	166.602	151.095	0.217838	0.558982	0.754301	no_diff (p.adj > 0.05, -1 <= log2FC <= 1)
Mm01G001040	2	0	4	1	3	0	1.74511	0	2.56905	1.51347	3.32707	0	1.52578	-0.16411	0.947242	NA	no_diff (p.adj > 0.05, -1 <= log2FC <= 1)
Mm01G001041	1	4	5	6	1	3	0.872554	3.28557	3.21132	9.08082	1.10902	3.62179	3.53018	-0.86994	0.554641	NA	no_diff (p.adj > 0.05, -1 <= log2FC <= 1)
Mm01G001042	0	0	0	0	0	0	0	0	0	0	0	0	0	NA	NA	NA	no diff (express=0)
Mm01G001043	0	0	0	0	0	0	0	0	0	0	0	0	0	NA	NA	NA	no diff (express=0)
Mm01G001044	187	206	337	115	217	139	163.168	169.207	216.443	174.049	240.658	167.81	188.556	-0.0863738	0.795801	0.901199	no_diff (p.adj > 0.05, -1 <= log2FC <= 1)
Mm01G001045	0	0	0	0	0	0	0	0	0	0	0	0	0	NA	NA	NA	no diff (express=0)
Mm01G001046	76	56	125	30	129	79	66.3141	45.998	80.2829	45.4041	143.064	95.3739	79.4062	-0.562554	0.329247	0.557137	no_diff (p.adj > 0.05, -1 <= log2FC <= 1)
Mm01G001047	0	0	0	0	0	0	0	0	0	0	0	0	0	NA	NA	NA	no diff (express=0)
Mm01G001048	0	0	0	0	0	0	0	0	0	0	0	0	0	NA	NA	NA	no diff (express=0)
Mm01G001049	0	0	0	0	0	0	0	0	0	0	0	0	0	NA	NA	NA	no diff (express=0)
Mm01G001050	89	94	32	26	15	40	77.6573	77.211	20.5524	39.3502	16.6354	48.2906	46.6161	0.750678	0.322665	0.551131	no_diff (p.adj > 0.05, -1 <= log2FC <= 1)
Mm01G001051	160	155	273	104	485	189	139.609	127.316	175.338	157.401	537.876	228.173	227.619	-1.06317	0.0546973	0.168541	no_diff (p.adj > 0.05, -1 <= log2FC <= 1)
Mm01G001052	355	79	558	149	139	286	309.757	64.8901	358.383	225.507	154.154	345.278	242.995	0.0165025	0.980973	0.990873	no_diff (p.adj > 0.05, -1 <= log2FC <= 1)
Mm01G001053	1	0	0	0	0	0	0.872554	0	0	0	0	0	0.145426	0.249044	0.951333	NA	no_diff (p.adj > 0.05, -1 <= log2FC <= 1)
Mm01G001054	0	0	4	0	0	0	0	0	2.56905	0	0	0	0.428176	1.90008	0.633537	NA	no diff (express=0)
Mm01G001055	0	0	0	4	0	0	0	0	0	6.05388	0	0	1.00898	-3.81253	0.336046	NA	no diff (express=0)
Mm01G001056	33	22	36	6	11	16	28.7943	18.0707	23.1215	9.08082	12.1993	19.3162	18.4305	0.776411	0.254759	0.476198	no_diff (p.adj > 0.05, -1 <= log2FC <= 1)
Mm01G001057	546	426	430	136	127	140	476.415	349.914	276.173	205.832	140.846	169.017	269.699	1.09755	0.00281879	0.0179961	rich (p.adj < 0.05, log2FC >= 1)
Mm01G001058	312	384	675	840	2287	1618	272.237	315.415	433.528	1271.31	2536.34	1953.35	1130.36	-2.49564	2.01943e-10	1.20585e-08	down (p.adj < 0.05, log2FC <= -1)
Mm01G001059	0	0	0	0	0	0	0	0	0	0	0	0	0	NA	NA	NA	no diff (express=0)
Mm01G001060	5	12	40	2	3	0	4.36277	9.85672	25.6905	3.02694	3.32707	0	7.71067	2.66568	0.0621417	0.184598	no_diff (p.adj > 0.05, -1 <= log2FC <= 1)
Mm01G001061	0	0	0	0	0	0	0	0	0	0	0	0	0	NA	NA	NA	no diff (express=0)
Mm01G001062	0	0	0	0	0	0	0	0	0	0	0	0	0	NA	NA	NA	no diff (express=0)
Mm01G001063	0	0	0	0	0	0	0	0	0	0	0	0	0	NA	NA	NA	no diff (express=0)
Mm01G001064	0	0	0	0	0	0	0	0	0	0	0	0	0	NA	NA	NA	no diff (express=0)
Mm01G001065	0	0	0	0	0	0	0	0	0	0	0	0	0	NA	NA	NA	no diff (express=0)
Mm01G001066	92	47	91	72	47	7	80.275	38.6055	58.446	108.97	52.1241	8.45085	57.8119	0.0687611	0.938445	0.971606	no_diff (p.adj > 0.05, -1 <= log2FC <= 1)
Mm01G001067	0	0	0	0	0	0	0	0	0	0	0	0	0	NA	NA	NA	no diff (express=0)
Mm01G001068	0	0	0	0	0	0	0	0	0	0	0	0	0	NA	NA	NA	no diff (express=0)
Mm01G001069	0	0	0	0	0	0	0	0	0	0	0	0	0	NA	NA	NA	no diff (express=0)
Mm01G001070	921	1498	1971	841	1175	1140	803.622	1230.45	1265.9	1272.83	1303.1	1376.28	1208.7	-0.259973	0.374965	0.603497	no_diff (p.adj > 0.05, -1 <= log2FC <= 1)
Mm01G001071	468	618	872	185	395	422	408.355	507.621	560.054	279.992	438.064	509.465	450.592	0.265022	0.457151	0.674321	no_diff (p.adj > 0.05, -1 <= log2FC <= 1)
Mm01G001072	13	19	26	5	5	6	11.3432	15.6065	16.6988	7.56735	5.54512	7.24359	10.6674	1.1108	0.164323	0.359822	no_diff (p.adj > 0.05, -1 <= log2FC <= 1)
Mm01G001073	0	3	2	136	4	3	0	2.46418	1.28453	205.832	4.43609	3.62179	36.2731	-5.82328	NA	NA	no diff (express=0)
Mm01G001074	225	391	584	140	194	130	196.325	321.165	375.082	211.886	215.151	156.944	246.092	0.613369	0.11634	0.286271	no_diff (p.adj > 0.05, -1 <= log2FC <= 1)
Mm01G001075	84	89	169	67	146	91	73.2946	73.104	108.543	101.402	161.917	109.861	104.687	-0.549767	0.183045	0.385922	no_diff (p.adj > 0.05, -1 <= log2FC <= 1)
Mm01G001076	8	2	18	11	145	213	6.98043	1.64279	11.5607	16.6482	160.808	257.147	75.798	-4.41897	2.70087e-05	0.000402498	down (p.adj < 0.05, log2FC <= -1)
Mm01G001077	0	0	0	0	0	0	0	0	0	0	0	0	0	NA	NA	NA	no diff (express=0)
Mm01G001078	0	0	0	0	0	0	0	0	0	0	0	0	0	NA	NA	NA	no diff (express=0)
Mm01G001079	0	0	0	0	0	0	0	0	0	0	0	0	0	NA	NA	NA	no diff (express=0)
Mm01G001080	0	0	0	0	0	0	0	0	0	0	0	0	0	NA	NA	NA	no diff (express=0)
Mm01G001081	0	0	0	0	0	0	0	0	0	0	0	0	0	NA	NA	NA	no diff (express=0)
Mm01G001082	0	6	0	11	0	0	0	4.92836	0	16.6482	0	0	3.59609	-1.75359	0.634846	NA	no diff (express=0)
Mm01G001083	0	0	0	0	0	0	0	0	0	0	0	0	0	NA	NA	NA	no diff (express=0)
Mm01G001084	3	2	5	4	0	0	2.61766	1.64279	3.21132	6.05388	0	0	2.25427	0.351042	0.877438	NA	no_diff (p.adj > 0.05, -1 <= log2FC <= 1)
Mm01G001085	75	80	446	64	261	244	65.4416	65.7115	286.449	96.8621	289.455	294.572	183.082	-0.704538	0.359492	0.588003	no_diff (p.adj > 0.05, -1 <= log2FC <= 1)
Mm01G001086	1087	1148	1313	350	856	880	948.466	942.96	843.292	529.715	949.324	1062.39	879.358	0.104905	0.771558	0.888605	no_diff (p.adj > 0.05, -1 <= log2FC <= 1)
Mm01G001087	426	387	473	161	383	260	371.708	317.879	303.791	243.669	424.756	313.889	329.282	0.0138864	0.967191	0.98411	no_diff (p.adj > 0.05, -1 <= log2FC <= 1)
Mm01G001088	4	0	0	4	5	2	3.49022	0	0	6.05388	5.54512	2.41453	2.91729	-2.03745	0.341626	NA	no diff (express=0)
Mm01G001089	0	0	0	0	0	0	0	0	0	0	0	0	0	NA	NA	NA	no diff (express=0)
Mm01G001090	0	0	0	0	0	0	0	0	0	0	0	0	0	NA	NA	NA	no diff (express=0)
Mm01G001091	0	0	0	0	7	0	0	0	0	0	7.76317	0	1.29386	-4.19622	0.288086	NA	no diff (express=0)
Mm01G001092	1234	985	879	329	606	388	1076.73	809.072	564.549	497.932	672.068	468.419	681.462	0.579825	0.119152	0.290915	no_diff (p.adj > 0.05, -1 <= log2FC <= 1)
Mm01G001093	0	0	0	0	0	0	0	0	0	0	0	0	0	NA	NA	NA	no diff (express=0)
Mm01G001094	9	27	51	15	21	35	7.85299	22.1776	32.7554	22.7021	23.2895	42.2542	25.172	-0.485751	0.529538	0.73309	no_diff (p.adj > 0.05, -1 <= log2FC <= 1)
Mm01G001095	0	0	0	0	0	0	0	0	0	0	0	0	0	NA	NA	NA	no diff (express=0)
Mm01G001096	467	478	841	213	239	266	407.483	392.626	540.143	322.369	265.057	321.132	374.802	0.562463	0.0505564	0.159484	no_diff (p.adj > 0.05, -1 <= log2FC <= 1)
Mm01G001097	0	0	5	0	0	0	0	0	3.21132	0	0	0	0.535219	2.21817	0.576346	NA	no diff (express=0)
Mm01G001098	54	45	37	42	85	91	47.1179	36.9627	23.7637	63.5657	94.267	109.861	62.5897	-1.3201	0.00827555	0.0417916	down (p.adj < 0.05, log2FC <= -1)
Mm01G001099	39	57	73	16	15	10	34.0296	46.8194	46.8852	24.2155	16.6354	12.0726	30.1096	1.28483	0.0248043	0.0955283	no_diff (p.adj > 0.05, -1 <= log2FC <= 1)
Mm01G001100	8	60	29	7	41	43	6.98043	49.2836	18.6256	10.5943	45.47	51.9124	30.4777	-0.532827	0.583445	0.772941	no_diff (p.adj > 0.05, -1 <= log2FC <= 1)
Mm01G001101	233	264	467	158	92	130	203.305	216.848	299.937	239.128	102.03	156.944	203.032	0.535863	0.232601	0.448763	no_diff (p.adj > 0.05, -1 <= log2FC <= 1)
Mm01G001102	28	37	58	12	43	41	24.4315	30.3916	37.2513	18.1616	47.688	49.4978	34.5703	-0.33041	0.593832	0.780025	no_diff (p.adj > 0.05, -1 <= log2FC <= 1)
Mm01G001103	31	86	208	2	103	115	27.0492	70.6398	133.591	3.02694	114.229	138.835	81.2286	-0.147904	0.89555	0.951503	no_diff (p.adj > 0.05, -1 <= log2FC <= 1)
Mm01G001104	0	0	0	0	0	0	0	0	0	0	0	0	0	NA	NA	NA	no diff (express=0)
Mm01G001105	160	313	0	73	0	0	139.609	257.096	0	110.483	0	0	84.5313	1.84509	0.620719	0.797748	no_diff (p.adj > 0.05, -1 <= log2FC <= 1)
Mm01G001106	82	70	60	7	5	18	71.5494	57.4975	38.5358	10.5943	5.54512	21.7308	34.2422	2.14481	0.00281388	0.0179785	rich (p.adj < 0.05, log2FC >= 1)
Mm01G001107	20	81	25	0	6	2	17.4511	66.5329	16.0566	0	6.65414	2.41453	18.1849	3.41286	0.00536682	0.0299283	rich (p.adj < 0.05, log2FC >= 1)
Mm01G001108	52	92	29	9	5	11	45.3728	75.5682	18.6256	13.6212	5.54512	13.2799	28.6688	2.11295	0.009894	0.047849	rich (p.adj < 0.05, log2FC >= 1)
Mm01G001109	0	0	0	0	0	0	0	0	0	0	0	0	0	NA	NA	NA	no diff (express=0)
Mm01G001110	0	0	0	0	0	0	0	0	0	0	0	0	0	NA	NA	NA	no diff (express=0)
Mm01G001111	8	21	5	5	0	0	6.98043	17.2493	3.21132	7.56735	0	0	5.83473	1.90429	0.325038	0.553032	no_diff (p.adj > 0.05, -1 <= log2FC <= 1)
Mm01G001112	46	105	17	2	7	7	40.1375	86.2463	10.9185	3.02694	7.76317	8.45085	26.0905	2.81658	0.00467698	0.0267956	rich (p.adj < 0.05, log2FC >= 1)
Mm01G001113	50	497	56	24	2	8	43.6277	408.232	35.9667	36.3233	2.21805	9.65811	89.3377	3.35209	NA	NA	no diff (express=0)
Mm01G001114	19	69	22	2	10	16	16.5785	56.6761	14.1298	3.02694	11.0902	19.3162	20.1363	1.37226	0.171176	0.36966	no_diff (p.adj > 0.05, -1 <= log2FC <= 1)
Mm01G001115	7	20	7	0	0	0	6.10788	16.4279	4.49584	0	0	0	4.50526	5.27283	0.0114204	0.0533564	no_diff (p.adj > 0.05, -1 <= log2FC <= 1)
Mm01G001116	0	0	0	0	0	0	0	0	0	0	0	0	0	NA	NA	NA	no diff (express=0)
Mm01G001117	0	0	0	0	0	0	0	0	0	0	0	0	0	NA	NA	NA	no diff (express=0)
Mm01G001118	100	74	67	59	4	51	87.2554	60.7831	43.0316	89.2947	4.43609	61.5705	57.7286	0.302481	0.75274	0.877912	no_diff (p.adj > 0.05, -1 <= log2FC <= 1)
Mm01G001119	4	8	12	2	6	0	3.49022	6.57115	7.70716	3.02694	6.65414	0	4.57493	0.869455	0.561559	0.75636	no_diff (p.adj > 0.05, -1 <= log2FC <= 1)
Mm01G001120	1	0	0	0	0	0	0.872554	0	0	0	0	0	0.145426	0.249044	0.951333	NA	no_diff (p.adj > 0.05, -1 <= log2FC <= 1)
Mm01G001121	0	0	0	0	0	0	0	0	0	0	0	0	0	NA	NA	NA	no diff (express=0)
Mm01G001122	0	0	0	0	0	0	0	0	0	0	0	0	0	NA	NA	NA	no diff (express=0)
Mm01G001123	0	0	0	0	0	0	0	0	0	0	0	0	0	NA	NA	NA	no diff (express=0)
Mm01G001124	0	2	0	0	0	0	0	1.64279	0	0	0	0	0.273798	1.22398	0.76144	NA	no diff (express=0)
Mm01G001125	210	1117	162	19	13	62	183.236	917.496	104.047	28.7559	14.4173	74.8504	220.467	3.35106	0.000363757	0.00346583	rich (p.adj < 0.05, log2FC >= 1)
Mm01G001126	3	29	2	0	0	0	2.61766	23.8204	1.28453	0	0	0	4.62043	5.3092	0.0295389	0.108628	no_diff (p.adj > 0.05, -1 <= log2FC <= 1)
Mm01G001127	0	0	0	0	0	0	0	0	0	0	0	0	0	NA	NA	NA	no diff (express=0)
Mm01G001128	1	3	0	0	0	1	0.872554	2.46418	0	0	0	1.20726	0.757333	1.28678	0.729547	NA	no diff (express=0)
Mm01G001129	126	358	147	22	9	48	109.942	294.059	94.4127	33.2963	9.98121	57.9487	99.9399	2.3014	0.00338263	0.0207091	rich (p.adj < 0.05, log2FC >= 1)
Mm01G001130	2	0	0	0	0	0	1.74511	0	0	0	0	0	0.290851	1.30041	0.746652	NA	no diff (express=0)
Mm01G001131	70	263	49	3	2	54	61.0788	216.026	31.4709	4.54041	2.21805	65.1923	63.4211	2.09746	0.0976311	0.254353	no_diff (p.adj > 0.05, -1 <= log2FC <= 1)
Mm01G001132	1701	1850	2605	304	226	344	1484.21	1519.58	1673.1	460.095	250.639	415.299	967.154	2.05595	7.78166e-10	4.03013e-08	rich (p.adj < 0.05, log2FC >= 1)
Mm01G001133	406	416	477	190	329	367	354.257	341.7	306.36	287.559	364.869	443.066	349.635	-0.129984	0.66111	0.823835	no_diff (p.adj > 0.05, -1 <= log2FC <= 1)
Mm01G001134	56	49	60	37	40	48	48.863	40.2483	38.5358	55.9984	44.3609	57.9487	47.6592	-0.310395	0.460969	0.677618	no_diff (p.adj > 0.05, -1 <= log2FC <= 1)
Mm01G001135	0	0	0	0	0	0	0	0	0	0	0	0	0	NA	NA	NA	no diff (express=0)
Mm01G001136	237	326	347	134	213	137	206.795	267.774	222.865	202.805	236.222	165.395	216.976	0.205934	0.507202	0.715769	no_diff (p.adj > 0.05, -1 <= log2FC <= 1)
Mm01G001137	126	208	299	36	213	170	109.942	170.85	192.037	54.4849	236.222	205.235	161.462	-0.0707963	0.909668	0.958791	no_diff (p.adj > 0.05, -1 <= log2FC <= 1)
Mm01G001138	162	380	336	78	77	59	141.354	312.129	215.8	118.051	85.3948	71.2286	157.326	1.28819	0.0054587	0.0303179	rich (p.adj < 0.05, log2FC >= 1)
Mm01G001139	148	198	147	69	86	111	129.138	162.636	94.4127	104.429	95.376	134.006	120	0.208459	0.597762	0.783064	no_diff (p.adj > 0.05, -1 <= log2FC <= 1)
Mm01G001140	0	1	2	0	0	0	0	0.821393	1.28453	0	0	0	0.350987	1.60474	0.688511	NA	no diff (express=0)
Mm01G001141	133	154	187	41	100	80	116.05	126.495	120.103	62.0523	110.902	96.5811	105.364	0.422402	0.267573	0.490854	no_diff (p.adj > 0.05, -1 <= log2FC <= 1)
Mm01G001142	0	0	0	0	0	0	0	0	0	0	0	0	0	NA	NA	NA	no diff (express=0)
Mm01G001143	183	316	469	116	84	166	159.677	259.56	301.222	175.563	93.158	200.406	198.264	0.621206	0.187294	0.391593	no_diff (p.adj > 0.05, -1 <= log2FC <= 1)
Mm01G001144	3	5	5	3	3	4	2.61766	4.10697	3.21132	4.54041	3.32707	4.82906	3.77208	-0.348218	0.768107	0.886583	no_diff (p.adj > 0.05, -1 <= log2FC <= 1)
Mm01G001145	3632	5282	7946	2759	6909	6581	3169.12	4338.6	5103.42	4175.66	7662.24	7945.01	5399.01	-0.649588	0.0935042	0.246797	no_diff (p.adj > 0.05, -1 <= log2FC <= 1)
Mm01G001146	197	251	502	151	34	37	171.893	206.17	322.416	228.534	37.7068	44.6688	168.565	1.1768	0.129918	0.308538	no_diff (p.adj > 0.05, -1 <= log2FC <= 1)
Mm01G001147	0	0	0	0	0	0	0	0	0	0	0	0	0	NA	NA	NA	no diff (express=0)
Mm01G001148	234	292	197	53	43	103	204.178	239.847	126.526	80.2139	47.688	124.348	137.133	1.17748	0.0238396	0.0926174	no_diff (p.adj > 0.05, -1 <= log2FC <= 1)
Mm01G001149	960	1851	2645	1636	3596	3123	837.652	1520.4	1698.79	2476.04	3988.05	3770.29	2381.87	-1.33492	0.000913726	0.00728141	down (p.adj < 0.05, log2FC <= -1)
Mm01G001150	356	594	238	152	276	293	310.629	487.908	152.859	230.047	306.091	353.728	306.877	0.0951175	0.853331	0.930353	no_diff (p.adj > 0.05, -1 <= log2FC <= 1)
Mm01G001151	0	0	0	0	0	0	0	0	0	0	0	0	0	NA	NA	NA	no diff (express=0)
Mm01G001152	0	0	0	0	0	0	0	0	0	0	0	0	0	NA	NA	NA	no diff (express=0)
Mm01G001153	27	23	32	0	0	0	23.559	18.892	20.5524	0	0	0	10.5006	6.49515	3.60436e-05	0.000520245	rich (p.adj < 0.05, log2FC >= 1)
Mm01G001154	697	1000	1493	939	2144	1724	608.17	821.393	958.899	1421.15	2377.75	2081.32	1378.11	-1.29975	0.000193262	0.00206679	down (p.adj < 0.05, log2FC <= -1)
Mm01G001155	486	372	522	110	248	328	424.061	305.558	335.261	166.482	275.038	395.983	317.064	0.34476	0.421591	0.644944	no_diff (p.adj > 0.05, -1 <= log2FC <= 1)
Mm01G001156	69	64	73	22	26	16	60.2062	52.5692	46.8852	33.2963	28.8346	19.3162	40.1846	0.975184	0.0456983	0.147975	no_diff (p.adj > 0.05, -1 <= log2FC <= 1)
Mm01G001157	0	8	1	115	4	3	0	6.57115	0.642263	174.049	4.43609	3.62179	31.5534	-4.66238	NA	NA	no diff (express=0)
Mm01G001158	0	0	0	0	0	0	0	0	0	0	0	0	0	NA	NA	NA	no diff (express=0)
Mm01G001159	296	420	84	155	47	33	258.276	344.985	53.9501	234.588	52.1241	39.8397	163.961	1.01154	0.262297	0.485157	no_diff (p.adj > 0.05, -1 <= log2FC <= 1)
Mm01G001160	284	220	225	133	185	111	247.805	180.707	144.509	201.292	205.169	134.006	185.581	0.083539	0.831009	0.918536	no_diff (p.adj > 0.05, -1 <= log2FC <= 1)
Mm01G001161	8	2	23	11	155	245	6.98043	1.64279	14.7721	16.6482	171.899	295.78	84.6203	-4.36134	6.04836e-05	0.000801768	down (p.adj < 0.05, log2FC <= -1)
Mm01G001162	0	0	0	0	0	0	0	0	0	0	0	0	0	NA	NA	NA	no diff (express=0)
Mm01G001163	0	0	0	0	0	0	0	0	0	0	0	0	0	NA	NA	NA	no diff (express=0)
Mm01G001164	37	73	0	75	0	0	32.2845	59.9617	0	113.51	0	0	34.2927	-0.298603	0.936202	0.970348	no_diff (p.adj > 0.05, -1 <= log2FC <= 1)
Mm01G001165	365	519	0	161	0	0	318.482	426.303	0	243.669	0	0	164.742	1.61231	0.66528	0.826372	no_diff (p.adj > 0.05, -1 <= log2FC <= 1)
Mm01G001166	738	811	945	853	2587	1405	643.945	666.15	606.939	1290.99	2869.04	1696.21	1295.55	-1.6115	3.33201e-05	0.00048441	down (p.adj < 0.05, log2FC <= -1)
Mm01G001167	0	0	0	0	0	0	0	0	0	0	0	0	0	NA	NA	NA	no diff (express=0)
Mm01G001168	0	0	0	0	0	0	0	0	0	0	0	0	0	NA	NA	NA	no diff (express=0)
Mm01G001169	0	0	0	0	0	0	0	0	0	0	0	0	0	NA	NA	NA	no diff (express=0)
Mm01G001170	851	960	626	301	631	565	742.544	788.538	402.057	455.554	699.794	682.104	628.432	0.0721364	0.857709	0.933065	no_diff (p.adj > 0.05, -1 <= log2FC <= 1)
Mm01G001171	157	121	39	70	39	30	136.991	99.3886	25.0483	105.943	43.2519	36.2179	74.4734	0.497972	0.52694	0.731157	no_diff (p.adj > 0.05, -1 <= log2FC <= 1)
Mm01G001172	1	9	5	2	5	3	0.872554	7.39254	3.21132	3.02694	5.54512	3.62179	3.94504	-0.0961193	0.943729	0.974559	no_diff (p.adj > 0.05, -1 <= log2FC <= 1)
Mm01G001173	68	63	115	26	12	17	59.3337	51.7478	73.8603	39.3502	13.3083	20.5235	43.0206	1.35521	0.0237691	0.0924193	no_diff (p.adj > 0.05, -1 <= log2FC <= 1)
Mm01G001174	152	129	366	77	167	123	132.628	105.96	235.068	116.537	185.207	148.493	153.982	0.0731994	0.875327	0.942535	no_diff (p.adj > 0.05, -1 <= log2FC <= 1)
Mm01G001175	2	10	10	0	5	4	1.74511	8.21393	6.42263	0	5.54512	4.82906	4.45931	0.635679	0.677565	0.832834	no_diff (p.adj > 0.05, -1 <= log2FC <= 1)
Mm01G001176	756	575	1163	272	365	305	659.651	472.301	746.952	411.664	404.794	368.216	510.596	0.665982	0.0260083	0.0990555	no_diff (p.adj > 0.05, -1 <= log2FC <= 1)
Mm01G001177	0	0	0	0	0	0	0	0	0	0	0	0	0	NA	NA	NA	no diff (express=0)
Mm01G001178	61	40	106	40	39	36	53.2258	32.8557	68.0799	60.5388	43.2519	43.4615	50.2356	0.0732646	0.885765	0.947211	no_diff (p.adj > 0.05, -1 <= log2FC <= 1)
Mm01G001179	119	209	386	102	203	186	103.834	171.671	247.914	154.374	225.132	224.551	187.913	-0.206251	0.651972	0.817989	no_diff (p.adj > 0.05, -1 <= log2FC <= 1)
Mm01G001180	482	491	593	155	312	282	420.571	403.304	380.862	234.588	346.015	340.449	354.298	0.38501	0.185578	0.389067	no_diff (p.adj > 0.05, -1 <= log2FC <= 1)
Mm01G001181	68	100	80	68	47	50	59.3337	82.1393	51.3811	102.916	52.1241	60.3632	68.0429	-0.154906	0.752388	0.877697	no_diff (p.adj > 0.05, -1 <= log2FC <= 1)
Mm01G001182	5	0	10	0	0	1	4.36277	0	6.42263	0	0	1.20726	1.99878	2.99062	0.304508	NA	no diff (express=0)
Mm01G001183	20	42	109	51	50	28	17.4511	34.4985	70.0067	77.187	55.4512	33.8034	48.0663	-0.440628	0.534548	0.736634	no_diff (p.adj > 0.05, -1 <= log2FC <= 1)
Mm01G001184	0	0	0	0	3	6	0	0	0	0	3.32707	7.24359	1.76178	-4.63717	0.21368	NA	no diff (express=0)
Mm01G001185	0	0	0	0	0	0	0	0	0	0	0	0	0	NA	NA	NA	no diff (express=0)
Mm01G001186	29	20	47	26	59	37	25.3041	16.4279	30.1864	39.3502	65.4324	44.6688	36.895	-1.05548	0.0527792	0.16443	no_diff (p.adj > 0.05, -1 <= log2FC <= 1)
Mm01G001187	87	95	3	75	4	4	75.9122	78.0324	1.92679	113.51	4.43609	4.82906	46.4411	0.347826	0.815254	0.910114	no_diff (p.adj > 0.05, -1 <= log2FC <= 1)
Mm01G001188	0	9	0	0	0	0	0	7.39254	0	0	0	0	1.23209	3.40166	0.387304	NA	no diff (express=0)
Mm01G001189	0	0	0	0	0	0	0	0	0	0	0	0	0	NA	NA	NA	no diff (express=0)
Mm01G001190	4	26	1	7	0	0	3.49022	21.3562	0.642263	10.5943	0	0	6.01383	1.29017	0.568343	0.761404	no_diff (p.adj > 0.05, -1 <= log2FC <= 1)
Mm01G001191	8	90	2	18	0	1	6.98043	73.9254	1.28453	27.2425	0	1.20726	18.44	1.54257	0.417129	0.640299	no_diff (p.adj > 0.05, -1 <= log2FC <= 1)
Mm01G001192	176	232	346	204	46	30	153.57	190.563	222.223	308.748	51.0151	36.2179	160.389	0.51988	0.533992	0.736335	no_diff (p.adj > 0.05, -1 <= log2FC <= 1)
Mm01G001193	0	0	0	0	0	0	0	0	0	0	0	0	0	NA	NA	NA	no diff (express=0)
Mm01G001194	35	53	57	35	37	43	30.5394	43.5338	36.609	52.9715	41.0339	51.9124	42.7667	-0.395198	0.376872	0.605324	no_diff (p.adj > 0.05, -1 <= log2FC <= 1)
Mm01G001195	0	0	0	0	0	0	0	0	0	0	0	0	0	NA	NA	NA	no diff (express=0)
Mm01G001196	10	16	6	16	3	12	8.72554	13.1423	3.85358	24.2155	3.32707	14.4872	11.2919	-0.702834	0.510127	0.717999	no_diff (p.adj > 0.05, -1 <= log2FC <= 1)
Mm01G001197	0	0	0	0	0	0	0	0	0	0	0	0	0	NA	NA	NA	no diff (express=0)
Mm01G001198	213	242	137	93	154	128	185.854	198.777	87.9901	140.753	170.79	154.53	156.449	0.0173931	0.968847	0.984897	no_diff (p.adj > 0.05, -1 <= log2FC <= 1)
Mm01G001199	0	0	0	0	0	0	0	0	0	0	0	0	0	NA	NA	NA	no diff (express=0)
Mm01G001200	793	823	346	385	186	137	691.935	676.007	222.223	582.686	206.278	165.395	424.087	0.737575	0.272879	0.496927	no_diff (p.adj > 0.05, -1 <= log2FC <= 1)
Mm01G001201	405	333	80	142	77	55	353.384	273.524	51.3811	214.913	85.3948	66.3995	174.166	0.888716	0.266008	0.489081	no_diff (p.adj > 0.05, -1 <= log2FC <= 1)
Mm01G001202	22	67	0	79	0	0	19.1962	55.0334	0	119.564	0	0	32.2989	-0.68712	0.853879	0.930398	no_diff (p.adj > 0.05, -1 <= log2FC <= 1)
Mm01G001203	177	650	56	914	49	34	154.442	533.906	35.9667	1383.31	54.3422	41.047	367.169	-1.02934	0.433508	0.655112	no_diff (p.adj > 0.05, -1 <= log2FC <= 1)
Mm01G001204	9	25	21	712	33	39	7.85299	20.5348	13.4875	1077.59	36.5978	47.0833	200.525	-4.79212	NA	NA	no diff (express=0)
Mm01G001205	2575	2261	2466	3632	665	493	2246.83	1857.17	1583.82	5496.92	737.501	595.181	2086.24	-0.263732	NA	NA	no_diff (p.adj > 0.05, -1 <= log2FC <= 1)
Mm01G001206	0	0	0	0	0	0	0	0	0	0	0	0	0	NA	NA	NA	no diff (express=0)
Mm01G001207	336	201	763	99	626	532	293.178	165.1	490.047	149.834	694.249	642.265	405.779	-0.64858	0.343494	0.57163	no_diff (p.adj > 0.05, -1 <= log2FC <= 1)
Mm01G001208	157	178	480	72	398	298	136.991	146.208	308.286	108.97	441.391	359.765	250.269	-0.622049	0.330555	0.558629	no_diff (p.adj > 0.05, -1 <= log2FC <= 1)
Mm01G001209	42	55	261	28	30	22	36.6473	45.1766	167.631	42.3772	33.2707	26.5598	58.6104	1.29287	0.0869057	0.234516	no_diff (p.adj > 0.05, -1 <= log2FC <= 1)
Mm01G001210	0	0	0	0	0	0	0	0	0	0	0	0	0	NA	NA	NA	no diff (express=0)
Mm01G001211	10	26	447	46	620	346	8.72554	21.3562	287.092	69.6196	687.595	417.713	248.684	-1.8881	0.121728	0.295278	no_diff (p.adj > 0.05, -1 <= log2FC <= 1)
Mm01G001212	8	18	76	549	117	130	6.98043	14.7851	48.812	830.895	129.756	156.944	198.029	-3.9772	3.0068e-05	0.000442791	down (p.adj < 0.05, log2FC <= -1)
Mm01G001213	1732	1535	5775	2533	1401	1107	1511.26	1260.84	3709.07	3833.62	1553.74	1336.44	2200.83	-0.0527101	0.931922	0.967932	no_diff (p.adj > 0.05, -1 <= log2FC <= 1)
Mm01G001214	0	0	0	0	0	0	0	0	0	0	0	0	0	NA	NA	NA	no diff (express=0)
Mm01G001215	0	1	0	0	0	0	0	0.821393	0	0	0	0	0.136899	0.249044	0.951333	NA	no_diff (p.adj > 0.05, -1 <= log2FC <= 1)
Mm01G001216	777	631	1553	673	975	611	677.975	518.299	997.435	1018.57	1081.3	737.638	838.535	-0.370756	0.324112	0.552524	no_diff (p.adj > 0.05, -1 <= log2FC <= 1)
Mm01G001217	6	0	48	13	25	7	5.23533	0	30.8286	19.6751	27.7256	8.45085	15.3193	-0.623955	0.678078	0.833151	no_diff (p.adj > 0.05, -1 <= log2FC <= 1)
Mm01G001218	0	0	2	0	4	0	0	0	1.28453	0	4.43609	0	0.953437	-1.76482	0.655961	NA	no diff (express=0)
Mm01G001219	0	0	0	0	0	0	0	0	0	0	0	0	0	NA	NA	NA	no diff (express=0)
Mm01G001220	259	299	739	66	154	91	225.992	245.597	474.633	99.889	170.79	109.861	221.127	1.31288	0.00558467	0.0308798	rich (p.adj < 0.05, log2FC >= 1)
Mm01G001221	0	0	0	0	0	0	0	0	0	0	0	0	0	NA	NA	NA	no diff (express=0)
Mm01G001222	571	468	59	505	45	26	498.228	384.412	37.8935	764.302	49.9061	31.3889	294.355	0.123182	0.920152	0.9627	no_diff (p.adj > 0.05, -1 <= log2FC <= 1)
Mm01G001223	0	0	0	0	0	0	0	0	0	0	0	0	0	NA	NA	NA	no diff (express=0)
Mm01G001224	466	584	219	146	32	22	406.61	479.694	140.656	220.967	35.4888	26.5598	218.329	1.86331	0.0367705	0.126823	no_diff (p.adj > 0.05, -1 <= log2FC <= 1)
Mm01G001225	73	154	7	79	5	6	63.6965	126.495	4.49584	119.564	5.54512	7.24359	54.5066	0.560676	0.685234	0.838046	no_diff (p.adj > 0.05, -1 <= log2FC <= 1)
Mm01G001226	0	0	0	0	0	0	0	0	0	0	0	0	0	NA	NA	NA	no diff (express=0)
Mm01G001227	25	26	33	68	22	9	21.8139	21.3562	21.1947	102.916	24.3985	10.8654	33.7574	-1.09493	0.232512	0.448693	no_diff (p.adj > 0.05, -1 <= log2FC <= 1)
Mm01G001228	115	199	58	282	107	51	100.344	163.457	37.2513	426.799	118.666	61.5705	151.348	-1.01106	0.235765	0.452366	no_diff (p.adj > 0.05, -1 <= log2FC <= 1)
Mm01G001229	54	11	35	100	117	131	47.1179	9.03533	22.4792	151.347	129.756	158.152	86.3145	-2.48546	0.000135291	0.00156497	down (p.adj < 0.05, log2FC <= -1)
Mm01G001230	24	5	31	27	36	13	20.9413	4.10697	19.9102	40.8637	39.9249	15.6944	23.5736	-1.09776	0.206157	0.416347	no_diff (p.adj > 0.05, -1 <= log2FC <= 1)
Mm01G001231	0	0	0	0	0	0	0	0	0	0	0	0	0	NA	NA	NA	no diff (express=0)
Mm01G001232	0	0	0	0	0	0	0	0	0	0	0	0	0	NA	NA	NA	no diff (express=0)
Mm01G001233	11	7	0	33	36	0	9.5981	5.74975	0	49.9445	39.9249	0	17.5362	-2.55687	0.173561	0.372838	no_diff (p.adj > 0.05, -1 <= log2FC <= 1)
Mm01G001234	0	0	2	6	0	0	0	0	1.28453	9.08082	0	0	1.72756	-2.77259	0.479803	NA	no diff (express=0)
Mm01G001235	0	0	0	0	0	0	0	0	0	0	0	0	0	NA	NA	NA	no diff (express=0)
Mm01G001236	2779	1416	3722	1680	1008	362	2424.83	1163.09	2390.5	2542.63	1117.9	437.03	1679.33	0.54533	0.414949	0.638241	no_diff (p.adj > 0.05, -1 <= log2FC <= 1)
Mm01G001237	299	307	275	45	48	94	260.894	252.168	176.622	68.1062	53.2331	113.483	154.084	1.55333	0.000496169	0.00446706	rich (p.adj < 0.05, log2FC >= 1)
Mm01G001238	18	69	13	27	18	15	15.706	56.6761	8.34942	40.8637	19.9624	18.109	26.6111	0.0350327	0.969868	0.985161	no_diff (p.adj > 0.05, -1 <= log2FC <= 1)
Mm01G001239	133	212	240	128	217	165	116.05	174.135	154.143	193.724	240.658	199.199	179.652	-0.512275	0.11592	0.285493	no_diff (p.adj > 0.05, -1 <= log2FC <= 1)
Mm01G001240	0	0	0	0	0	0	0	0	0	0	0	0	0	NA	NA	NA	no diff (express=0)
Mm01G001241	1592	1595	2175	690	808	835	1389.11	1310.12	1396.92	1044.29	896.091	1008.07	1174.1	0.474809	0.0186858	0.077462	no_diff (p.adj > 0.05, -1 <= log2FC <= 1)
Mm01G001242	0	0	0	0	0	0	0	0	0	0	0	0	0	NA	NA	NA	no diff (express=0)
Mm01G001243	51	58	146	46	68	48	44.5003	47.6408	93.7704	69.6196	75.4136	57.9487	64.8156	-0.122257	0.808533	0.90687	no_diff (p.adj > 0.05, -1 <= log2FC <= 1)
Mm01G001244	54	103	0	20	21	122	47.1179	84.6035	0	30.2694	23.2895	147.286	55.4278	-0.610296	0.68283	0.836239	no_diff (p.adj > 0.05, -1 <= log2FC <= 1)
Mm01G001245	0	0	0	0	0	0	0	0	0	0	0	0	0	NA	NA	NA	no diff (express=0)
Mm01G001246	0	0	0	0	0	0	0	0	0	0	0	0	0	NA	NA	NA	no diff (express=0)
Mm01G001247	0	2	0	1	3	8	0	1.64279	0	1.51347	3.32707	9.65811	2.69024	-3.17808	0.151196	NA	no diff (express=0)
Mm01G001248	0	0	0	0	0	0	0	0	0	0	0	0	0	NA	NA	NA	no diff (express=0)
Mm01G001249	8	5	0	4	0	0	6.98043	4.10697	0	6.05388	0	0	2.85688	0.895748	0.755834	NA	no_diff (p.adj > 0.05, -1 <= log2FC <= 1)
Mm01G001250	0	0	0	0	0	0	0	0	0	0	0	0	0	NA	NA	NA	no diff (express=0)
Mm01G001251	13	8	0	0	0	0	11.3432	6.57115	0	0	0	0	2.98573	4.67853	0.161972	NA	no diff (express=0)
Mm01G001252	0	0	0	0	0	0	0	0	0	0	0	0	0	NA	NA	NA	no diff (express=0)
Mm01G001253	0	0	0	0	0	0	0	0	0	0	0	0	0	NA	NA	NA	no diff (express=0)
Mm01G001254	290	382	599	374	922	649	253.041	313.772	384.716	566.038	1022.52	783.514	553.933	-1.3178	0.000310891	0.00303737	down (p.adj < 0.05, log2FC <= -1)
Mm01G001255	0	0	0	0	0	0	0	0	0	0	0	0	0	NA	NA	NA	no diff (express=0)
Mm01G001256	2	0	12	0	0	5	1.74511	0	7.70716	0	0	6.03632	2.58143	0.646623	0.826059	NA	no_diff (p.adj > 0.05, -1 <= log2FC <= 1)
Mm01G001257	0	0	0	0	0	0	0	0	0	0	0	0	0	NA	NA	NA	no diff (express=0)
Mm01G001258	13	4	2	18	17	9	11.3432	3.28557	1.28453	27.2425	18.8534	10.8654	12.1458	-1.85601	0.0858688	0.232486	no_diff (p.adj > 0.05, -1 <= log2FC <= 1)
Mm01G001259	0	0	0	0	0	0	0	0	0	0	0	0	0	NA	NA	NA	no diff (express=0)
Mm01G001260	3	0	71	44	487	122	2.61766	0	45.6007	66.5927	540.095	147.286	133.699	-3.96008	0.00633739	0.0340275	down (p.adj < 0.05, log2FC <= -1)
Mm01G001261	4	0	0	0	0	0	3.49022	0	0	0	0	0	0.581703	2.31033	0.56022	NA	no diff (express=0)
Mm01G001262	151	93	46	125	48	51	131.756	76.3896	29.5441	189.184	53.2331	61.5705	90.2795	-0.35359	0.649339	0.816745	no_diff (p.adj > 0.05, -1 <= log2FC <= 1)
Mm01G001263	0	0	0	0	0	0	0	0	0	0	0	0	0	NA	NA	NA	no diff (express=0)
Mm01G001264	110	238	65	355	251	231	95.981	195.492	41.7471	537.282	278.365	278.878	237.957	-1.71652	0.00789808	0.0403371	down (p.adj < 0.05, log2FC <= -1)
Mm01G001265	295	371	249	93	242	194	257.403	304.737	159.924	140.753	268.384	234.209	227.568	0.163571	0.710986	0.855223	no_diff (p.adj > 0.05, -1 <= log2FC <= 1)
Mm01G001266	505	667	722	272	565	543	440.64	547.869	463.714	411.664	626.598	655.544	524.338	-0.223153	0.478779	0.692626	no_diff (p.adj > 0.05, -1 <= log2FC <= 1)
Mm01G001267	24	28	26	63	49	45	20.9413	22.999	16.6988	95.3486	54.3422	54.3269	44.1095	-1.74883	0.000713364	0.00596081	down (p.adj < 0.05, log2FC <= -1)
Mm01G001268	842	1082	1408	318	703	641	734.691	888.748	904.307	481.283	779.644	773.856	760.421	0.312142	0.328902	0.556915	no_diff (p.adj > 0.05, -1 <= log2FC <= 1)
Mm01G001269	0	0	0	0	0	0	0	0	0	0	0	0	0	NA	NA	NA	no diff (express=0)
Mm01G001270	201	100	184	160	159	19	175.383	82.1393	118.176	242.155	176.335	22.938	136.188	-0.231638	0.776972	0.89152	no_diff (p.adj > 0.05, -1 <= log2FC <= 1)
Mm01G001271	2	4	6	2	0	0	1.74511	3.28557	3.85358	3.02694	0	0	1.9852	1.64404	0.46285	NA	no diff (express=0)
Mm01G001272	0	0	0	0	0	0	0	0	0	0	0	0	0	NA	NA	NA	no diff (express=0)
Mm01G001273	47	88	653	30	302	228	41.01	72.2826	419.398	45.4041	334.925	275.256	198.046	-0.299317	0.765737	0.885306	no_diff (p.adj > 0.05, -1 <= log2FC <= 1)
Mm01G001274	0	0	0	0	0	1	0	0	0	0	0	1.20726	0.201211	-1.67451	0.681534	NA	no diff (express=0)
Mm01G001275	40	59	77	30	27	32	34.9022	48.4622	49.4543	45.4041	29.9436	38.6325	41.1331	0.228864	0.629842	0.803595	no_diff (p.adj > 0.05, -1 <= log2FC <= 1)
Mm01G001276	237	155	188	66	101	130	206.795	127.316	120.746	99.889	112.011	156.944	137.284	0.299552	0.475941	0.690151	no_diff (p.adj > 0.05, -1 <= log2FC <= 1)
Mm01G001277	390	322	435	138	167	171	340.296	264.489	279.385	208.859	185.207	206.442	247.446	0.558492	0.039591	0.133971	no_diff (p.adj > 0.05, -1 <= log2FC <= 1)
Mm01G001278	592	538	1038	238	760	497	516.552	441.91	666.669	360.206	842.858	600.01	571.368	-0.150594	0.723322	0.86189	no_diff (p.adj > 0.05, -1 <= log2FC <= 1)
Mm01G001279	1017	1495	1823	573	1474	1651	887.388	1227.98	1170.85	867.218	1634.7	1993.19	1296.89	-0.452215	0.268915	0.492349	no_diff (p.adj > 0.05, -1 <= log2FC <= 1)
Mm01G001280	2	0	10	6	0	0	1.74511	0	6.42263	9.08082	0	0	2.87476	-0.12728	0.965491	NA	no_diff (p.adj > 0.05, -1 <= log2FC <= 1)
Mm01G001281	159	113	132	84	44	10	138.736	92.8174	84.7788	127.131	48.797	12.0726	84.0556	0.75544	0.358852	0.587323	no_diff (p.adj > 0.05, -1 <= log2FC <= 1)
Mm01G001282	0	0	0	0	0	6	0	0	0	0	0	7.24359	1.20726	-4.09133	0.300705	NA	no diff (express=0)
Mm01G001283	10652	12188	9881	881	2305	2477	9294.45	10011.1	6346.2	1333.37	2556.3	2990.39	5421.98	1.89831	5.49115e-06	0.00010229	rich (p.adj < 0.05, log2FC >= 1)
Mm01G001284	27	42	101	9	27	48	23.559	34.4985	64.8686	13.6212	29.9436	57.9487	37.4066	0.274178	0.721712	0.861037	no_diff (p.adj > 0.05, -1 <= log2FC <= 1)
Mm01G001285	550	663	1016	479	1096	1134	479.905	544.584	652.54	724.952	1215.49	1369.04	831.085	-0.98089	0.0065791	0.0350353	no_diff (p.adj > 0.05, -1 <= log2FC <= 1)
Mm01G001286	104	235	156	650	699	925	90.7456	193.027	100.193	983.756	775.208	1116.72	543.275	-2.90545	5.01813e-12	3.91805e-10	down (p.adj < 0.05, log2FC <= -1)
Mm01G001287	0	0	0	0	11	17	0	0	0	0	12.1993	20.5235	5.45379	-6.26588	0.0267754	0.101074	no_diff (p.adj > 0.05, -1 <= log2FC <= 1)
Mm01G001288	556	1142	84	1230	240	295	485.14	938.031	53.9501	1861.57	266.166	356.143	660.166	-0.74966	0.464533	0.680868	no_diff (p.adj > 0.05, -1 <= log2FC <= 1)
Mm01G001289	1837	2550	2463	3285	8095	6752	1602.88	2094.55	1581.89	4971.75	8977.55	8151.45	4563.35	-2.0658	2.00299e-09	9.456e-08	down (p.adj < 0.05, log2FC <= -1)
Mm01G001290	0	0	0	0	0	0	0	0	0	0	0	0	0	NA	NA	NA	no diff (express=0)
Mm01G001291	60	123	213	772	713	307	52.3533	101.031	136.802	1168.4	790.734	370.63	436.658	-3.00273	1.92512e-07	5.59269e-06	down (p.adj < 0.05, log2FC <= -1)
Mm01G001292	371	469	457	277	332	387	323.718	385.233	293.514	419.231	368.196	467.211	376.184	-0.324002	0.232803	0.448955	no_diff (p.adj > 0.05, -1 <= log2FC <= 1)
Mm01G001293	1239	1262	2298	1561	3546	3249	1081.09	1036.6	1475.92	2362.53	3932.6	3922.4	2301.86	-1.5075	1.27125e-05	0.000210033	down (p.adj < 0.05, log2FC <= -1)
Mm01G001294	5	16	7	2	3	0	4.36277	13.1423	4.49584	3.02694	3.32707	0	4.72582	1.79759	0.229802	0.445369	no_diff (p.adj > 0.05, -1 <= log2FC <= 1)
Mm01G001295	319	386	525	266	242	211	278.345	317.058	337.188	402.583	268.384	254.733	309.715	0.0132661	0.967437	0.984144	no_diff (p.adj > 0.05, -1 <= log2FC <= 1)
Mm01G001296	114	12	155	511	653	12	99.4712	9.85672	99.5508	773.383	724.192	14.4872	286.824	-2.85529	0.0167891	0.0714034	no_diff (p.adj > 0.05, -1 <= log2FC <= 1)
Mm01G001297	6	4	0	58	6	0	5.23533	3.28557	0	87.7813	6.65414	0	17.1594	-3.47947	0.0833098	0.227655	no_diff (p.adj > 0.05, -1 <= log2FC <= 1)
Mm01G001298	16	8	5	33	15	0	13.9609	6.57115	3.21132	49.9445	16.6354	0	15.0539	-1.48746	0.324633	0.552894	no_diff (p.adj > 0.05, -1 <= log2FC <= 1)
Mm01G001299	44	73	0	30	0	0	38.3924	59.9617	0	45.4041	0	0	23.9597	1.11958	0.653013	0.8187	no_diff (p.adj > 0.05, -1 <= log2FC <= 1)
Mm01G001300	2677	1380	1428	93	239	235	2335.83	1133.52	917.152	140.753	265.057	283.707	846.003	2.66778	1.73275e-07	5.12651e-06	rich (p.adj < 0.05, log2FC >= 1)
Mm01G001301	300	548	234	133	248	298	261.766	450.124	150.29	201.292	275.038	359.765	283.046	0.0428923	0.93434	0.969327	no_diff (p.adj > 0.05, -1 <= log2FC <= 1)
Mm01G001302	24	25	69	3	19	23	20.9413	20.5348	44.3162	4.54041	21.0714	27.7671	23.1952	0.67662	0.432311	0.654198	no_diff (p.adj > 0.05, -1 <= log2FC <= 1)
Mm01G001303	388	429	416	140	191	245	338.551	352.378	267.182	211.886	211.824	295.78	279.6	0.411861	0.189563	0.394669	no_diff (p.adj > 0.05, -1 <= log2FC <= 1)
Mm01G001304	4	4	8	0	0	0	3.49022	3.28557	5.13811	0	0	0	1.98565	4.09459	0.103585	NA	no diff (express=0)
Mm01G001305	1004	1058	1221	500	689	910	876.044	869.034	784.204	756.735	764.117	1098.61	858.124	-0.0509641	0.855745	0.931733	no_diff (p.adj > 0.05, -1 <= log2FC <= 1)
Mm01G001306	0	0	0	0	0	0	0	0	0	0	0	0	0	NA	NA	NA	no diff (express=0)
Mm01G001307	0	0	0	0	0	0	0	0	0	0	0	0	0	NA	NA	NA	no diff (express=0)
Mm01G001308	0	0	0	0	0	0	0	0	0	0	0	0	0	NA	NA	NA	no diff (express=0)
Mm01G001309	172	185	356	112	208	157	150.079	151.958	228.646	169.509	230.677	189.54	186.735	-0.151937	0.667962	0.827485	no_diff (p.adj > 0.05, -1 <= log2FC <= 1)
Mm01G001310	43	70	15	26	13	2	37.5198	57.4975	9.63395	39.3502	14.4173	2.41453	26.8056	0.905364	0.416795	0.640022	no_diff (p.adj > 0.05, -1 <= log2FC <= 1)
Mm01G001311	323	131	657	279	68	21	281.835	107.603	421.967	422.258	75.4136	25.3525	222.405	0.635738	0.51787	0.724301	no_diff (p.adj > 0.05, -1 <= log2FC <= 1)
Mm01G001312	0	0	0	0	0	0	0	0	0	0	0	0	0	NA	NA	NA	no diff (express=0)
Mm01G001313	0	0	0	0	0	0	0	0	0	0	0	0	0	NA	NA	NA	no diff (express=0)
Mm01G001314	0	0	0	0	0	0	0	0	0	0	0	0	0	NA	NA	NA	no diff (express=0)
Mm01G001315	0	0	0	0	0	0	0	0	0	0	0	0	0	NA	NA	NA	no diff (express=0)
Mm01G001316	1799	497	1067	19	67	43	1569.73	408.232	685.295	28.7559	74.3046	51.9124	469.704	4.09746	9.55702e-11	6.13631e-09	rich (p.adj < 0.05, log2FC >= 1)
Mm01G001317	0	0	0	0	0	0	0	0	0	0	0	0	0	NA	NA	NA	no diff (express=0)
Mm01G001318	979	338	341	31	103	101	854.231	277.631	219.012	46.9176	114.229	121.934	272.326	2.25153	0.000896737	0.00717664	rich (p.adj < 0.05, log2FC >= 1)
Mm01G001319	1404	2486	1350	994	1835	3072	1225.07	2041.98	867.055	1504.39	2035.06	3708.72	1897.04	-0.810258	0.112217	0.279251	no_diff (p.adj > 0.05, -1 <= log2FC <= 1)
Mm01G001320	0	0	0	0	0	0	0	0	0	0	0	0	0	NA	NA	NA	no diff (express=0)
Mm01G001321	0	0	0	0	0	0	0	0	0	0	0	0	0	NA	NA	NA	no diff (express=0)
Mm01G001322	0	0	0	0	0	0	0	0	0	0	0	0	0	NA	NA	NA	no diff (express=0)
Mm01G001323	0	0	0	0	0	0	0	0	0	0	0	0	0	NA	NA	NA	no diff (express=0)
Mm01G001324	2565	2177	3100	1364	1377	1418	2238.1	1788.17	1991.02	2064.37	1527.13	1711.9	1886.78	0.182538	0.471899	0.686882	no_diff (p.adj > 0.05, -1 <= log2FC <= 1)
Mm01G001325	243	193	307	530	199	123	212.031	158.529	197.175	802.139	220.696	148.493	289.844	-1.04349	0.125098	0.300773	no_diff (p.adj > 0.05, -1 <= log2FC <= 1)
Mm01G001326	56	67	43	11	22	21	48.863	55.0334	27.6173	16.6482	24.3985	25.3525	32.9855	0.975453	0.0925223	0.244872	no_diff (p.adj > 0.05, -1 <= log2FC <= 1)
Mm01G001327	748	973	1511	2792	1327	1231	652.671	799.216	970.46	4225.61	1471.67	1486.14	1600.96	-1.56785	0.00276975	0.0177332	down (p.adj < 0.05, log2FC <= -1)
Mm01G001328	21455	10690	25262	1662	5728	4028	18720.7	8780.69	16224.9	2515.39	6352.49	4862.86	9576.16	1.67098	0.000598211	0.00519098	rich (p.adj < 0.05, log2FC >= 1)
Mm01G001329	52	88	136	40	28	11	45.3728	72.2826	87.3478	60.5388	31.0527	13.2799	51.6458	0.977329	0.160527	0.354418	no_diff (p.adj > 0.05, -1 <= log2FC <= 1)
Mm01G001330	18	8	17	15	30	16	15.706	6.57115	10.9185	22.7021	33.2707	19.3162	18.0808	-1.18747	0.0946706	0.248921	no_diff (p.adj > 0.05, -1 <= log2FC <= 1)
Mm01G001331	286	102	433	83	274	241	249.551	83.7821	278.1	125.618	303.872	290.951	221.979	-0.237486	0.697357	0.846421	no_diff (p.adj > 0.05, -1 <= log2FC <= 1)
Mm01G001332	0	0	0	0	0	0	0	0	0	0	0	0	0	NA	NA	NA	no diff (express=0)
Mm01G001333	0	1	1	0	0	3	0	0.821393	0.642263	0	0	3.62179	0.847575	-1.305	0.72027	NA	no diff (express=0)
Mm01G001334	14	16	26	135	40	4	12.2158	13.1423	16.6988	204.318	44.3609	4.82906	49.2609	-2.58706	0.0219133	0.086889	no_diff (p.adj > 0.05, -1 <= log2FC <= 1)
Mm01G001335	295	335	540	114	306	328	257.403	275.167	346.822	172.536	339.361	395.983	297.879	-0.0472274	0.911625	0.958846	no_diff (p.adj > 0.05, -1 <= log2FC <= 1)
Mm01G001336	0	0	0	0	0	0	0	0	0	0	0	0	0	NA	NA	NA	no diff (express=0)
Mm01G001337	1218	1991	2885	1692	2964	3052	1062.77	1635.39	1852.93	2560.79	3287.15	3684.57	2347.27	-1.06655	0.00176231	0.0123206	down (p.adj < 0.05, log2FC <= -1)
Mm01G001338	0	0	0	0	0	0	0	0	0	0	0	0	0	NA	NA	NA	no diff (express=0)
Mm01G001339	0	0	0	0	0	0	0	0	0	0	0	0	0	NA	NA	NA	no diff (express=0)
Mm01G001340	7	53	91	297	163	320	6.10788	43.5338	58.446	449.501	180.771	386.325	187.447	-3.22852	4.32049e-05	0.000606213	down (p.adj < 0.05, log2FC <= -1)
Mm01G001341	0	0	0	0	0	0	0	0	0	0	0	0	0	NA	NA	NA	no diff (express=0)
Mm01G001342	101	99	278	146	119	50	88.128	81.3179	178.549	220.967	131.974	60.3632	126.883	-0.244267	0.698689	0.847251	no_diff (p.adj > 0.05, -1 <= log2FC <= 1)
Mm01G001343	0	0	3	0	0	0	0	0	1.92679	0	0	0	0.321132	1.49114	0.71006	NA	no diff (express=0)
Mm01G001344	833	1306	1462	632	1229	1346	726.838	1072.74	938.989	956.513	1362.99	1624.98	1113.84	-0.526698	0.120851	0.293821	no_diff (p.adj > 0.05, -1 <= log2FC <= 1)
Mm01G001345	0	0	0	0	0	0	0	0	0	0	0	0	0	NA	NA	NA	no diff (express=0)
Mm01G001346	103	191	133	6	17	20	89.8731	156.886	85.421	9.08082	18.8534	24.1453	64.0433	2.65793	5.6284e-06	0.000104105	rich (p.adj < 0.05, log2FC >= 1)
Mm01G001347	0	0	0	0	0	0	0	0	0	0	0	0	0	NA	NA	NA	no diff (express=0)
Mm01G001348	98	183	255	76	48	21	85.5103	150.315	163.777	115.024	53.2331	25.3525	98.8686	1.05205	0.11158	0.278095	no_diff (p.adj > 0.05, -1 <= log2FC <= 1)
Mm01G001349	278	353	498	137	177	202	242.57	289.952	319.847	207.345	196.297	243.867	249.98	0.397367	0.162462	0.357181	no_diff (p.adj > 0.05, -1 <= log2FC <= 1)
Mm01G001350	1676	1542	1781	528	620	870	1462.4	1266.59	1143.87	799.112	687.595	1050.32	1068.31	0.610111	0.0372297	0.128119	no_diff (p.adj > 0.05, -1 <= log2FC <= 1)
Mm01G001351	488	756	809	643	523	553	425.806	620.973	519.591	973.161	580.019	667.617	631.195	-0.502674	0.145691	0.331686	no_diff (p.adj > 0.05, -1 <= log2FC <= 1)
Mm01G001352	0	0	39	0	20	13	0	0	25.0483	0	22.1805	15.6944	10.4872	-0.594594	0.816565	0.910722	no_diff (p.adj > 0.05, -1 <= log2FC <= 1)
Mm01G001353	0	0	0	6	5	5	0	0	0	9.08082	5.54512	6.03632	3.44371	-5.59639	0.00936784	NA	no diff (express=0)
Mm01G001354	363	549	634	348	509	409	316.737	450.945	407.195	526.688	564.493	493.771	459.971	-0.431669	0.111555	0.278095	no_diff (p.adj > 0.05, -1 <= log2FC <= 1)
Mm01G001355	1089	902	1750	387	885	451	950.212	740.897	1123.96	585.713	981.486	544.476	821.124	0.41436	0.271626	0.495662	no_diff (p.adj > 0.05, -1 <= log2FC <= 1)
Mm01G001356	72	68	89	29	16	15	62.8239	55.8547	57.1614	43.8906	17.7444	18.109	42.5973	1.15674	0.0456285	0.147856	no_diff (p.adj > 0.05, -1 <= log2FC <= 1)
Mm01G001357	0	0	0	0	0	0	0	0	0	0	0	0	0	NA	NA	NA	no diff (express=0)
Mm01G001358	109	81	292	118	56	30	95.1084	66.5329	187.541	178.589	62.1053	36.2179	104.349	0.339858	0.649646	0.816891	no_diff (p.adj > 0.05, -1 <= log2FC <= 1)
Mm01G001359	4	10	9	4	2	1	3.49022	8.21393	5.78037	6.05388	2.21805	1.20726	4.49395	0.920708	0.471025	0.686085	no_diff (p.adj > 0.05, -1 <= log2FC <= 1)
Mm01G001360	0	0	0	0	0	4	0	0	0	0	0	4.82906	0.804843	-3.50812	0.377625	NA	no diff (express=0)
Mm01G001361	343	372	238	207	117	126	299.286	305.558	152.859	313.288	129.756	152.115	225.477	0.35014	0.504627	0.713491	no_diff (p.adj > 0.05, -1 <= log2FC <= 1)
Mm01G001362	254	322	415	329	426	399	221.629	264.489	266.539	497.932	472.444	481.698	367.455	-0.946952	5.62842e-05	0.000756064	no_diff (p.adj > 0.05, -1 <= log2FC <= 1)
Mm01G001363	523	495	492	155	226	221	456.346	406.59	315.994	234.588	250.639	266.805	321.827	0.647072	0.0238581	0.0926355	no_diff (p.adj > 0.05, -1 <= log2FC <= 1)
Mm01G001364	227	360	305	195	294	330	198.07	295.702	195.89	295.127	326.053	398.397	284.873	-0.565145	0.0916965	0.243376	no_diff (p.adj > 0.05, -1 <= log2FC <= 1)
Mm01G001365	1728	2283	1113	579	662	1297	1507.77	1875.24	714.839	876.299	734.174	1565.82	1212.36	0.367299	0.470469	0.685762	no_diff (p.adj > 0.05, -1 <= log2FC <= 1)
Mm01G001366	0	0	2	0	0	0	0	0	1.28453	0	0	0	0.214088	0.917341	0.821271	NA	no_diff (p.adj > 0.05, -1 <= log2FC <= 1)
Mm01G001367	402	533	796	281	379	298	350.767	437.803	511.242	425.285	420.32	359.765	417.53	0.109904	0.699131	0.84759	no_diff (p.adj > 0.05, -1 <= log2FC <= 1)
Mm01G001368	30	73	67	25	29	40	26.1766	59.9617	43.0316	37.8368	32.1617	48.2906	41.2432	0.128318	0.817251	0.911134	no_diff (p.adj > 0.05, -1 <= log2FC <= 1)
Mm01G001369	2056	1164	1906	220	376	286	1793.97	956.102	1224.15	332.963	416.993	345.278	844.91	1.85871	1.37315e-07	4.23006e-06	rich (p.adj < 0.05, log2FC >= 1)
Mm01G001370	3	14	6	0	0	0	2.61766	11.4995	3.85358	0	0	0	2.99512	4.68471	0.0465775	NA	no diff (express=0)
Mm01G001371	0	0	0	0	0	0	0	0	0	0	0	0	0	NA	NA	NA	no diff (express=0)
Mm01G001372	938	1334	1832	800	2112	1762	818.456	1095.74	1176.63	1210.78	2342.26	2127.2	1461.84	-0.878129	0.0189701	0.0783425	no_diff (p.adj > 0.05, -1 <= log2FC <= 1)
Mm01G001373	3001	5027	8053	1856	2291	3025	2618.54	4129.14	5172.15	2809	2540.77	3651.97	3486.93	0.405168	0.272441	0.496518	no_diff (p.adj > 0.05, -1 <= log2FC <= 1)
Mm01G001374	5	5	43	15	16	24	4.36277	4.10697	27.6173	22.7021	17.7444	28.9743	17.5846	-0.929266	0.358924	0.587367	no_diff (p.adj > 0.05, -1 <= log2FC <= 1)
Mm01G001375	572	697	1117	387	156	243	499.101	572.511	717.408	585.713	173.008	293.365	473.518	0.767881	0.140578	0.324164	no_diff (p.adj > 0.05, -1 <= log2FC <= 1)
Mm01G001376	0	0	0	0	0	0	0	0	0	0	0	0	0	NA	NA	NA	no diff (express=0)
Mm01G001377	6	5	0	2	0	0	5.23533	4.10697	0	3.02694	0	0	2.06154	1.67077	0.575565	NA	no diff (express=0)
Mm01G001378	26	48	32	0	9	6	22.6864	39.4269	20.5524	0	9.98121	7.24359	16.6484	2.22897	0.0366734	0.126605	no_diff (p.adj > 0.05, -1 <= log2FC <= 1)
Mm01G001379	1516	1357	1767	629	642	626	1322.79	1114.63	1134.88	951.973	711.993	755.747	998.669	0.562741	0.0266259	0.100657	no_diff (p.adj > 0.05, -1 <= log2FC <= 1)
Mm01G001380	40	23	109	27	17	9	34.9022	18.892	70.0067	40.8637	18.8534	10.8654	32.3972	0.823852	0.316199	0.544574	no_diff (p.adj > 0.05, -1 <= log2FC <= 1)
Mm01G001381	8	0	0	0	0	0	6.98043	0	0	0	0	0	1.16341	3.31569	0.39962	NA	no diff (express=0)
Mm01G001382	598	400	573	109	136	141	521.787	328.557	368.017	164.968	150.827	170.224	284.064	1.32581	4.47695e-05	0.00062455	rich (p.adj < 0.05, log2FC >= 1)
Mm01G001383	717	901	1026	287	388	350	625.621	740.075	658.962	434.366	430.301	422.542	551.978	0.653531	0.00266689	0.0171925	no_diff (p.adj > 0.05, -1 <= log2FC <= 1)
Mm01G001384	247	188	1419	100	843	133	215.521	154.422	911.372	151.347	934.907	160.566	421.356	0.0392014	0.966536	0.984096	no_diff (p.adj > 0.05, -1 <= log2FC <= 1)
Mm01G001385	2219	558	1977	72	344	93	1936.2	458.337	1269.75	108.97	381.504	112.276	711.173	2.60242	0.000281722	0.00281013	rich (p.adj < 0.05, log2FC >= 1)
Mm01G001386	0	0	0	0	0	0	0	0	0	0	0	0	0	NA	NA	NA	no diff (express=0)
Mm01G001387	5344	962	3407	526	2067	295	4662.93	790.18	2188.19	796.085	2292.35	356.143	1847.65	1.1493	0.163254	0.358385	no_diff (p.adj > 0.05, -1 <= log2FC <= 1)
Mm01G001388	0	0	0	0	6	10	0	0	0	0	6.65414	12.0726	3.12113	-5.46149	0.0878118	NA	no diff (express=0)
Mm01G001389	137	128	118	36	38	21	119.54	105.138	75.7871	54.4849	42.1429	25.3525	70.4076	1.30525	0.00781778	0.0400311	rich (p.adj < 0.05, log2FC >= 1)
Mm01G001390	92	119	331	352	217	124	80.275	97.7458	212.589	532.741	240.658	149.701	218.952	-1.23785	0.0553679	0.170071	no_diff (p.adj > 0.05, -1 <= log2FC <= 1)
Mm01G001391	3933	4333	9181	5733	11199	5917	3431.76	3559.1	5896.62	8676.72	12420	7143.38	6854.59	-1.13172	0.00339041	0.0207422	down (p.adj < 0.05, log2FC <= -1)
Mm01G001392	0	0	0	0	0	0	0	0	0	0	0	0	0	NA	NA	NA	no diff (express=0)
Mm01G001393	0	0	0	0	8	0	0	0	0	0	8.87219	0	1.4787	-4.38782	0.265992	NA	no diff (express=0)
Mm01G001394	613	724	1146	494	736	867	534.876	594.689	736.034	747.654	816.241	1046.7	746.032	-0.484564	0.0965524	0.252296	no_diff (p.adj > 0.05, -1 <= log2FC <= 1)
Mm01G001395	0	0	0	0	0	0	0	0	0	0	0	0	0	NA	NA	NA	no diff (express=0)
Mm01G001396	0	0	0	0	0	0	0	0	0	0	0	0	0	NA	NA	NA	no diff (express=0)
Mm01G001397	0	5	10	13	24	17	0	4.10697	6.42263	19.6751	26.6166	20.5235	12.8908	-2.64034	0.0196825	0.0805341	no_diff (p.adj > 0.05, -1 <= log2FC <= 1)
Mm01G001398	0	0	0	0	0	0	0	0	0	0	0	0	0	NA	NA	NA	no diff (express=0)
Mm01G001399	3270	5317	2436	411	658	1524	2853.25	4367.35	1564.55	622.036	729.738	1839.87	1996.13	1.46054	0.0133975	0.0601131	no_diff (p.adj > 0.05, -1 <= log2FC <= 1)
Mm01G001400	0	0	0	0	0	0	0	0	0	0	0	0	0	NA	NA	NA	no diff (express=0)
Mm01G001401	4203	4785	6239	3529	8383	7911	3667.35	3930.37	4007.08	5341.04	9296.95	9550.67	5965.57	-1.05969	0.00123353	0.00928393	down (p.adj < 0.05, log2FC <= -1)
Mm01G001402	128	626	72	69	25	80	111.687	514.192	46.243	104.429	27.7256	96.5811	150.143	1.55638	0.0964454	0.252074	no_diff (p.adj > 0.05, -1 <= log2FC <= 1)
Mm01G001403	169	154	151	78	63	80	147.462	126.495	96.9818	118.051	69.8685	96.5811	109.24	0.385303	0.33975	0.567821	no_diff (p.adj > 0.05, -1 <= log2FC <= 1)
Mm01G001404	124	185	69	29	86	63	108.197	151.958	44.3162	43.8906	95.376	76.0576	86.6325	0.494486	0.428826	0.651374	no_diff (p.adj > 0.05, -1 <= log2FC <= 1)
Mm01G001405	0	0	0	0	0	0	0	0	0	0	0	0	0	NA	NA	NA	no diff (express=0)
Mm01G001406	28	31	45	16	75	25	24.4315	25.4632	28.9018	24.2155	83.1768	30.1816	36.0617	-0.809751	0.237138	0.454234	no_diff (p.adj > 0.05, -1 <= log2FC <= 1)
Mm01G001407	7	4	2	4	24	17	6.10788	3.28557	1.28453	6.05388	26.6166	20.5235	10.6453	-2.34822	0.0303264	0.110519	no_diff (p.adj > 0.05, -1 <= log2FC <= 1)
Mm01G001408	4	0	5	0	4	1	3.49022	0	3.21132	0	4.43609	1.20726	2.05748	0.224412	0.923717	NA	no_diff (p.adj > 0.05, -1 <= log2FC <= 1)
Mm01G001409	164	104	187	52	79	23	143.099	85.4249	120.103	78.7004	87.6129	27.7671	90.4512	0.845852	0.140236	0.323671	no_diff (p.adj > 0.05, -1 <= log2FC <= 1)
Mm01G001410	10	11	9	14	8	0	8.72554	9.03533	5.78037	21.1886	8.87219	0	8.93367	-0.343294	0.807688	0.906595	no_diff (p.adj > 0.05, -1 <= log2FC <= 1)
Mm01G001411	15	19	3	9	0	0	13.0883	15.6065	1.92679	13.6212	0	0	7.3738	1.19114	0.555763	0.752234	no_diff (p.adj > 0.05, -1 <= log2FC <= 1)
Mm01G001412	10	11	19	10	0	4	8.72554	9.03533	12.203	15.1347	0	4.82906	8.32127	0.612052	0.660894	0.823775	no_diff (p.adj > 0.05, -1 <= log2FC <= 1)
Mm01G001413	3	0	5	0	0	5	2.61766	0	3.21132	0	0	6.03632	1.97755	-0.0537852	0.985765	NA	no_diff (p.adj > 0.05, -1 <= log2FC <= 1)
Mm01G001414	119	227	348	100	103	129	103.834	186.456	223.508	151.347	114.229	155.737	155.852	0.28892	0.506176	0.714823	no_diff (p.adj > 0.05, -1 <= log2FC <= 1)
Mm01G001415	57	77	66	24	0	34	49.7356	63.2473	42.3894	36.3233	0	41.047	38.7904	1.00942	0.409563	0.633979	no_diff (p.adj > 0.05, -1 <= log2FC <= 1)
Mm01G001416	3349	5150	5721	5488	9842	8553	2922.18	4230.18	3674.39	8305.92	10915	10325.7	6728.9	-1.44842	1.5927e-07	4.76607e-06	down (p.adj < 0.05, log2FC <= -1)
Mm01G001417	902	1690	1784	612	762	839	787.044	1388.15	1145.8	926.244	845.076	1012.89	1017.54	0.254526	0.429621	0.651912	no_diff (p.adj > 0.05, -1 <= log2FC <= 1)
Mm01G001418	0	0	0	14	17	35	0	0	0	21.1886	18.8534	42.2542	13.716	-7.59438	1.5506e-06	3.4281e-05	down (p.adj < 0.05, log2FC <= -1)
Mm01G001419	0	0	0	0	0	0	0	0	0	0	0	0	0	NA	NA	NA	no diff (express=0)
Mm01G001420	224	210	184	107	87	108	195.452	172.493	118.176	161.941	96.4851	130.385	145.822	0.323851	0.422676	0.645851	no_diff (p.adj > 0.05, -1 <= log2FC <= 1)
Mm01G001421	659	114	284	813	200	73	575.013	93.6388	182.403	1230.45	221.805	88.1303	398.574	-0.855614	0.396119	0.622453	no_diff (p.adj > 0.05, -1 <= log2FC <= 1)
Mm01G001422	0	0	12	7	6	0	0	0	7.70716	10.5943	6.65414	0	4.15927	-1.14435	0.675028	0.831551	no_diff (p.adj > 0.05, -1 <= log2FC <= 1)
Mm01G001423	0	0	0	0	0	0	0	0	0	0	0	0	0	NA	NA	NA	no diff (express=0)
Mm01G001424	0	0	0	0	0	0	0	0	0	0	0	0	0	NA	NA	NA	no diff (express=0)
Mm01G001425	8	14	12	30	11	0	6.98043	11.4995	7.70716	45.4041	12.1993	0	13.9651	-1.1301	0.435369	0.656366	no_diff (p.adj > 0.05, -1 <= log2FC <= 1)
Mm01G001426	81	123	223	49	102	71	70.6769	101.031	143.225	74.16	113.12	85.7158	97.9882	0.205966	0.650634	0.817221	no_diff (p.adj > 0.05, -1 <= log2FC <= 1)
Mm01G001427	0	0	0	0	0	0	0	0	0	0	0	0	0	NA	NA	NA	no diff (express=0)
Mm01G001428	173	191	243	110	108	115	150.952	156.886	156.07	166.482	119.775	138.835	148.167	0.129667	0.666232	0.826497	no_diff (p.adj > 0.05, -1 <= log2FC <= 1)
Mm01G001429	0	0	0	0	0	0	0	0	0	0	0	0	0	NA	NA	NA	no diff (express=0)
Mm01G001430	0	0	0	0	0	0	0	0	0	0	0	0	0	NA	NA	NA	no diff (express=0)
Mm01G001431	1024	828	1197	272	248	165	893.496	680.114	768.789	411.664	275.038	199.199	538.05	1.40467	0.000215523	0.00225742	rich (p.adj < 0.05, log2FC >= 1)
Mm01G001432	1180	766	862	236	201	238	1029.61	629.187	553.631	357.179	222.914	287.329	513.309	1.35182	0.000634591	0.00542921	rich (p.adj < 0.05, log2FC >= 1)
Mm01G001433	0	0	0	0	0	0	0	0	0	0	0	0	0	NA	NA	NA	no diff (express=0)
Mm01G001434	1715	1535	2387	1309	2583	2432	1496.43	1260.84	1533.08	1981.13	2864.61	2936.07	2012.03	-0.859212	0.00241132	0.0158727	no_diff (p.adj > 0.05, -1 <= log2FC <= 1)
Mm01G001435	638	267	278	116	178	164	556.69	219.312	178.549	175.563	197.406	197.991	254.252	0.740232	0.166028	0.362403	no_diff (p.adj > 0.05, -1 <= log2FC <= 1)
Mm01G001436	1277	33	190	53	167	30	1114.25	27.106	122.03	80.2139	185.207	36.2179	260.838	2.06545	0.0753049	0.212279	no_diff (p.adj > 0.05, -1 <= log2FC <= 1)
Mm01G001437	32	36	104	15	57	56	27.9217	29.5702	66.7954	22.7021	63.2143	67.6068	46.3017	-0.305648	0.658635	0.822358	no_diff (p.adj > 0.05, -1 <= log2FC <= 1)
Mm01G001438	268	354	194	11	21	23	233.845	290.773	124.599	16.6482	23.2895	27.7671	119.487	3.25269	5.22942e-10	2.85533e-08	rich (p.adj < 0.05, log2FC >= 1)
Mm01G001439	158	661	98	30	17	6	137.864	542.941	62.9418	45.4041	18.8534	7.24359	135.875	3.38726	0.000382224	0.00361544	rich (p.adj < 0.05, log2FC >= 1)
Mm01G001440	28	21	79	0	159	111	24.4315	17.2493	50.7388	0	176.335	134.006	67.1268	-1.74742	0.202171	0.411004	no_diff (p.adj > 0.05, -1 <= log2FC <= 1)
Mm01G001441	0	0	0	0	0	0	0	0	0	0	0	0	0	NA	NA	NA	no diff (express=0)
Mm01G001442	387	688	102	25	38	61	337.678	565.119	65.5109	37.8368	42.1429	73.6431	186.988	2.65427	0.000643491	0.00549098	rich (p.adj < 0.05, log2FC >= 1)
Mm01G001443	0	0	0	0	0	0	0	0	0	0	0	0	0	NA	NA	NA	no diff (express=0)
Mm01G001444	0	0	0	0	0	0	0	0	0	0	0	0	0	NA	NA	NA	no diff (express=0)
Mm01G001445	641	778	495	48	85	119	559.307	639.044	317.92	72.6466	94.267	143.664	304.475	2.28461	5.9058e-07	1.49381e-05	rich (p.adj < 0.05, log2FC >= 1)
Mm01G001446	0	0	0	0	0	0	0	0	0	0	0	0	0	NA	NA	NA	no diff (express=0)
Mm01G001447	0	0	0	0	0	0	0	0	0	0	0	0	0	NA	NA	NA	no diff (express=0)
Mm01G001448	0	0	0	0	0	0	0	0	0	0	0	0	0	NA	NA	NA	no diff (express=0)
Mm01G001449	520	587	222	20	8	46	453.728	482.158	142.582	30.2694	8.87219	55.5342	195.524	3.5115	4.37064e-06	8.38047e-05	rich (p.adj < 0.05, log2FC >= 1)
Mm01G001450	0	0	0	0	0	0	0	0	0	0	0	0	0	NA	NA	NA	no diff (express=0)
Mm01G001451	0	0	0	0	0	0	0	0	0	0	0	0	0	NA	NA	NA	no diff (express=0)
Mm01G001452	0	0	1	0	0	4	0	0	0.642263	0	0	4.82906	0.911887	-2.54634	0.521915	NA	no diff (express=0)
Mm01G001453	0	0	0	0	0	0	0	0	0	0	0	0	0	NA	NA	NA	no diff (express=0)
Mm01G001454	2098	3995	2568	86	307	302	1830.62	3281.47	1649.33	130.158	340.47	364.594	1266.11	3.01545	7.83769e-09	3.218e-07	rich (p.adj < 0.05, log2FC >= 1)
Mm01G001455	0	0	0	0	0	0	0	0	0	0	0	0	0	NA	NA	NA	no diff (express=0)
Mm01G001456	0	0	1	0	0	0	0	0	0.642263	0	0	0	0.107044	0.249044	0.951333	NA	no_diff (p.adj > 0.05, -1 <= log2FC <= 1)
Mm01G001457	0	0	0	0	0	0	0	0	0	0	0	0	0	NA	NA	NA	no diff (express=0)
Mm01G001458	0	0	0	0	0	0	0	0	0	0	0	0	0	NA	NA	NA	no diff (express=0)
Mm01G001459	0	6	3	4	0	0	0	4.92836	1.92679	6.05388	0	0	2.15151	0.205867	0.945488	NA	no_diff (p.adj > 0.05, -1 <= log2FC <= 1)
Mm01G001460	50	16	48	6	13	3	43.6277	13.1423	30.8286	9.08082	14.4173	3.62179	19.1198	1.68602	0.0573522	0.17458	no_diff (p.adj > 0.05, -1 <= log2FC <= 1)
Mm01G001461	4	7	11	3	5	0	3.49022	5.74975	7.0649	4.54041	5.54512	0	4.3984	0.700635	0.634407	0.806625	no_diff (p.adj > 0.05, -1 <= log2FC <= 1)
Mm01G001462	12	34	44	16	19	44	10.4707	27.9274	28.2596	24.2155	21.0714	53.1196	27.5107	-0.559444	0.451602	0.669471	no_diff (p.adj > 0.05, -1 <= log2FC <= 1)
Mm01G001463	103	133	12	6	0	1	89.8731	109.245	7.70716	9.08082	0	1.20726	36.1856	4.3835	0.00168829	0.0118953	rich (p.adj < 0.05, log2FC >= 1)
Mm01G001464	0	0	1	0	0	0	0	0	0.642263	0	0	0	0.107044	0.249044	0.951333	NA	no_diff (p.adj > 0.05, -1 <= log2FC <= 1)
Mm01G001465	0	0	0	0	0	0	0	0	0	0	0	0	0	NA	NA	NA	no diff (express=0)
Mm01G001466	0	0	0	0	0	0	0	0	0	0	0	0	0	NA	NA	NA	no diff (express=0)
Mm01G001467	3	1	0	2	0	0	2.61766	0.821393	0	3.02694	0	0	1.07767	0.210116	0.952017	NA	no_diff (p.adj > 0.05, -1 <= log2FC <= 1)
Mm01G001468	54	80	0	0	0	0	47.1179	65.7115	0	0	0	0	18.8049	7.33534	0.00316739	0.0196723	rich (p.adj < 0.05, log2FC >= 1)
Mm01G001469	0	0	0	0	0	0	0	0	0	0	0	0	0	NA	NA	NA	no diff (express=0)
Mm01G001470	1	2	0	0	0	0	0.872554	1.64279	0	0	0	0	0.419223	1.83911	0.64475	NA	no diff (express=0)
Mm01G001471	0	0	0	0	0	0	0	0	0	0	0	0	0	NA	NA	NA	no diff (express=0)
Mm01G001472	1180	1310	357	36	56	177	1029.61	1076.03	229.288	54.4849	62.1053	213.686	444.201	2.82031	0.000252033	0.00257085	rich (p.adj < 0.05, log2FC >= 1)
Mm01G001473	206	454	11	0	0	0	179.746	372.913	7.0649	0	0	0	93.2873	9.64629	5.70125e-08	1.91659e-06	rich (p.adj < 0.05, log2FC >= 1)
Mm01G001474	104	51	117	0	0	6	90.7456	41.8911	75.1448	0	0	7.24359	35.8375	4.81471	6.42661e-05	0.000842092	rich (p.adj < 0.05, log2FC >= 1)
Mm01G001475	678	846	1305	406	1144	941	591.592	694.899	838.154	614.469	1268.72	1136.04	857.312	-0.507331	0.19344	0.400065	no_diff (p.adj > 0.05, -1 <= log2FC <= 1)
Mm01G001476	0	0	31	15	20	16	0	0	19.9102	22.7021	22.1805	19.3162	14.0182	-1.67697	0.362129	0.590389	no_diff (p.adj > 0.05, -1 <= log2FC <= 1)
Mm01G001477	408	450	341	26	55	158	356.002	369.627	219.012	39.3502	60.9963	190.748	205.956	1.69577	0.0106367	0.0504886	no_diff (p.adj > 0.05, -1 <= log2FC <= 1)
Mm01G001478	697	846	1887	410	1654	1380	608.17	694.899	1211.95	620.523	1834.33	1666.02	1105.98	-0.712459	0.181024	0.383392	no_diff (p.adj > 0.05, -1 <= log2FC <= 1)
Mm01G001479	177	193	401	163	626	501	154.442	158.529	257.548	246.696	694.249	604.839	352.717	-1.43798	0.00481427	0.0274199	down (p.adj < 0.05, log2FC <= -1)
Mm01G001480	223	154	87	34	14	109	194.58	126.495	55.8769	51.458	15.5263	131.592	95.9212	0.923846	0.277472	0.502771	no_diff (p.adj > 0.05, -1 <= log2FC <= 1)
Mm01G001481	177	166	101	114	62	147	154.442	136.351	64.8686	172.536	68.7595	177.468	129.071	-0.235527	0.68412	0.837153	no_diff (p.adj > 0.05, -1 <= log2FC <= 1)
Mm01G001482	455	357	116	0	29	93	397.012	293.237	74.5025	0	32.1617	112.276	151.532	2.40205	0.0622831	0.184961	no_diff (p.adj > 0.05, -1 <= log2FC <= 1)
Mm01G001483	241	225	168	110	116	163	210.286	184.813	107.9	166.482	128.647	196.784	165.819	0.0309913	0.941311	0.973315	no_diff (p.adj > 0.05, -1 <= log2FC <= 1)
Mm01G001484	91	96	89	7	9	11	79.4024	78.8538	57.1614	10.5943	9.98121	13.2799	41.5455	2.66695	5.72621e-07	1.4526e-05	rich (p.adj < 0.05, log2FC >= 1)
Mm01G001485	101	107	162	75	85	105	88.128	87.8891	104.047	113.51	94.267	126.763	102.434	-0.253775	0.446908	0.66559	no_diff (p.adj > 0.05, -1 <= log2FC <= 1)
Mm01G001486	0	0	0	0	0	0	0	0	0	0	0	0	0	NA	NA	NA	no diff (express=0)
Mm01G001487	36	7	0	0	0	7	31.412	5.74975	0	0	0	8.45085	7.60209	2.1276	0.410149	0.634398	no_diff (p.adj > 0.05, -1 <= log2FC <= 1)
Mm01G001488	16	14	30	23	9	16	13.9609	11.4995	19.2679	34.8098	9.98121	19.3162	18.1393	-0.502298	0.515478	0.722111	no_diff (p.adj > 0.05, -1 <= log2FC <= 1)
Mm01G001489	77	179	52	4	11	16	67.1867	147.029	33.3977	6.05388	12.1993	19.3162	47.5305	2.7079	0.000766464	0.00631174	rich (p.adj < 0.05, log2FC >= 1)
Mm01G001490	304	386	103	16	35	58	265.256	317.058	66.1531	24.2155	38.8158	70.0213	130.253	2.28076	0.00167366	0.0118114	rich (p.adj < 0.05, log2FC >= 1)
Mm01G001491	0	0	0	0	0	0	0	0	0	0	0	0	0	NA	NA	NA	no diff (express=0)
Mm01G001492	0	0	0	0	0	0	0	0	0	0	0	0	0	NA	NA	NA	no diff (express=0)
Mm01G001493	52	66	21	6	11	55	45.3728	54.212	13.4875	9.08082	12.1993	66.3995	33.4587	0.361275	0.717958	0.858791	no_diff (p.adj > 0.05, -1 <= log2FC <= 1)
Mm01G001494	0	0	0	0	0	0	0	0	0	0	0	0	0	NA	NA	NA	no diff (express=0)
Mm01G001495	44	56	73	57	39	55	38.3924	45.998	46.8852	86.2678	43.2519	66.3995	54.5325	-0.570343	0.226656	0.441705	no_diff (p.adj > 0.05, -1 <= log2FC <= 1)
Mm01G001496	314	313	343	183	187	251	273.982	257.096	220.296	276.965	207.387	303.023	256.458	-0.0672712	0.825307	0.915631	no_diff (p.adj > 0.05, -1 <= log2FC <= 1)
Mm01G001497	144	106	105	50	63	91	125.648	87.0677	67.4376	75.6735	69.8685	109.861	89.2594	0.130446	0.773507	0.889828	no_diff (p.adj > 0.05, -1 <= log2FC <= 1)
Mm01G001498	76	79	187	145	110	62	66.3141	64.8901	120.103	219.453	121.993	74.8504	111.267	-0.7232	0.205426	0.415555	no_diff (p.adj > 0.05, -1 <= log2FC <= 1)
Mm01G001499	802	661	824	256	242	176	699.788	542.941	529.225	387.448	268.384	212.479	440.044	1.03077	0.0038775	0.0230168	rich (p.adj < 0.05, log2FC >= 1)
Mm01G001500	4920	5548	5370	3532	5385	4091	4292.97	4557.09	3448.95	5345.58	5972.09	4938.92	4759.27	-0.402598	0.0948552	0.249306	no_diff (p.adj > 0.05, -1 <= log2FC <= 1)
Mm01G001501	426	494	462	265	496	469	371.708	405.768	296.726	401.07	550.076	566.207	431.926	-0.499985	0.0988716	0.256664	no_diff (p.adj > 0.05, -1 <= log2FC <= 1)
Mm01G001502	0	0	0	0	0	0	0	0	0	0	0	0	0	NA	NA	NA	no diff (express=0)
Mm01G001503	0	0	0	0	0	0	0	0	0	0	0	0	0	NA	NA	NA	no diff (express=0)
Mm01G001504	0	0	0	2	0	0	0	0	0	3.02694	0	0	0.50449	-2.79799	0.486379	NA	no diff (express=0)
Mm01G001505	15	0	0	0	0	0	13.0883	0	0	0	0	0	2.18139	4.22517	0.281421	NA	no diff (express=0)
Mm01G001506	834	963	1325	425	1123	1548	727.71	791.002	850.999	643.225	1245.43	1868.85	1021.2	-0.665373	0.142104	0.326381	no_diff (p.adj > 0.05, -1 <= log2FC <= 1)
Mm01G001507	10	7	9	16	164	315	8.72554	5.74975	5.78037	24.2155	181.88	380.288	101.107	-4.8608	2.12559e-07	6.08902e-06	down (p.adj < 0.05, log2FC <= -1)
Mm01G001508	855	730	932	120	198	161	746.034	599.617	598.589	181.616	219.587	194.37	423.302	1.70485	9.72785e-11	6.22059e-09	rich (p.adj < 0.05, log2FC >= 1)
Mm01G001509	0	0	0	4	8	0	0	0	0	6.05388	8.87219	0	2.48768	-5.13067	0.132805	NA	no diff (express=0)
Mm01G001510	0	0	0	0	0	0	0	0	0	0	0	0	0	NA	NA	NA	no diff (express=0)
Mm01G001511	2	6	17	10	32	19	1.74511	4.92836	10.9185	15.1347	35.4888	22.938	15.1922	-2.04666	0.0305496	0.111043	no_diff (p.adj > 0.05, -1 <= log2FC <= 1)
Mm01G001512	7977	7761	10241	4879	6109	5605	6960.36	6374.83	6577.42	7384.22	6775.03	6766.72	6806.43	-0.0715633	0.693698	0.843832	no_diff (p.adj > 0.05, -1 <= log2FC <= 1)
Mm01G001513	471	449	562	225	161	166	410.973	368.806	360.952	340.531	178.553	200.406	310.037	0.667773	0.0729303	0.207238	no_diff (p.adj > 0.05, -1 <= log2FC <= 1)
Mm01G001514	614	881	808	1783	4404	5398	535.748	723.647	518.949	2698.52	4884.14	6516.81	2646.3	-2.98725	1.10371e-12	9.71934e-11	down (p.adj < 0.05, log2FC <= -1)
Mm01G001515	0	0	0	0	0	2	0	0	0	0	0	2.41453	0.402421	-2.51275	0.534352	NA	no diff (express=0)
Mm01G001516	4973	796	4401	615	3103	1891	4339.21	653.829	2826.6	930.784	3441.3	2282.94	2412.44	0.232528	0.755201	0.87937	no_diff (p.adj > 0.05, -1 <= log2FC <= 1)
Mm01G001517	395	521	672	281	507	567	344.659	427.946	431.601	425.285	562.275	684.519	479.381	-0.474098	0.13022	0.308857	no_diff (p.adj > 0.05, -1 <= log2FC <= 1)
Mm01G001518	526	478	404	252	425	282	458.964	392.626	259.474	381.394	471.335	340.449	384.04	-0.104217	0.769655	0.88739	no_diff (p.adj > 0.05, -1 <= log2FC <= 1)
Mm01G001519	62	112	109	26	33	20	54.0984	91.996	70.0067	39.3502	36.5978	24.1453	52.6991	1.11405	0.0229355	0.0900008	no_diff (p.adj > 0.05, -1 <= log2FC <= 1)
Mm01G001520	66	54	141	49	96	79	57.5886	44.3552	90.5591	74.16	106.466	95.3739	78.0839	-0.518443	0.266803	0.489957	no_diff (p.adj > 0.05, -1 <= log2FC <= 1)
Mm01G001521	77	250	187	0	0	28	67.1867	205.348	120.103	0	0	33.8034	71.0736	3.53318	0.0235913	0.0919032	no_diff (p.adj > 0.05, -1 <= log2FC <= 1)
Mm01G001522	340	612	704	20	149	177	296.668	502.693	452.153	30.2694	165.245	213.686	276.786	1.61033	0.0207855	0.0836987	no_diff (p.adj > 0.05, -1 <= log2FC <= 1)
Mm01G001523	0	0	0	0	0	0	0	0	0	0	0	0	0	NA	NA	NA	no diff (express=0)
Mm01G001524	0	0	0	0	0	0	0	0	0	0	0	0	0	NA	NA	NA	no diff (express=0)
Mm01G001525	0	0	0	0	0	0	0	0	0	0	0	0	0	NA	NA	NA	no diff (express=0)
Mm01G001526	78	102	0	0	0	0	68.0592	83.7821	0	0	0	0	25.3069	7.76389	0.00133927	0.00994247	rich (p.adj < 0.05, log2FC >= 1)
Mm01G001527	0	3	0	0	0	0	0	2.46418	0	0	0	0	0.410697	1.81213	0.649735	NA	no diff (express=0)
Mm01G001528	8	10	2	0	0	17	6.98043	8.21393	1.28453	0	0	20.5235	6.16706	-0.325022	0.87933	0.943818	no_diff (p.adj > 0.05, -1 <= log2FC <= 1)
Mm01G001529	1209	3236	2792	100	219	171	1054.92	2658.03	1793.2	151.347	242.876	206.442	1017.8	3.19491	1.30338e-12	1.13629e-10	rich (p.adj < 0.05, log2FC >= 1)
Mm01G001530	0	6	6	0	0	0	0	4.92836	3.85358	0	0	0	1.46366	3.65429	0.352485	NA	no diff (express=0)
Mm01G001531	0	0	0	0	0	0	0	0	0	0	0	0	0	NA	NA	NA	no diff (express=0)
Mm01G001532	2	10	0	5	0	0	1.74511	8.21393	0	7.56735	0	0	2.92107	0.413848	0.88886	NA	no_diff (p.adj > 0.05, -1 <= log2FC <= 1)
Mm01G001533	0	1	0	1	0	0	0	0.821393	0	1.51347	0	0	0.389144	-0.712729	0.86134	NA	no_diff (p.adj > 0.05, -1 <= log2FC <= 1)
Mm01G001534	0	0	0	0	0	0	0	0	0	0	0	0	0	NA	NA	NA	no diff (express=0)
Mm01G001535	11	8	0	4	0	0	9.5981	6.57115	0	6.05388	0	0	3.70385	1.44377	0.600359	0.78456	no_diff (p.adj > 0.05, -1 <= log2FC <= 1)
Mm01G001536	15	22	11	0	29	6	13.0883	18.0707	7.0649	0	32.1617	7.24359	12.9382	-0.057323	0.967494	0.984146	no_diff (p.adj > 0.05, -1 <= log2FC <= 1)
Mm01G001537	0	0	2	0	2	0	0	0	1.28453	0	2.21805	0	0.583762	-0.778515	0.846958	NA	no_diff (p.adj > 0.05, -1 <= log2FC <= 1)
Mm01G001538	0	0	0	0	0	0	0	0	0	0	0	0	0	NA	NA	NA	no diff (express=0)
Mm01G001539	3539	1287	1689	35	417	553	3087.97	1057.13	1084.78	52.9715	462.463	667.617	1068.82	2.14356	0.0121328	0.055726	no_diff (p.adj > 0.05, -1 <= log2FC <= 1)
Mm01G001540	0	0	0	0	0	0	0	0	0	0	0	0	0	NA	NA	NA	no diff (express=0)
Mm01G001541	103	118	114	59	110	107	89.8731	96.9244	73.218	89.2947	121.993	129.177	100.08	-0.393866	0.276545	0.501543	no_diff (p.adj > 0.05, -1 <= log2FC <= 1)
Mm01G001542	2049	2323	2602	568	803	915	1787.86	1908.1	1671.17	859.651	890.546	1104.65	1370.33	0.910367	0.000103574	0.00125449	no_diff (p.adj > 0.05, -1 <= log2FC <= 1)
Mm01G001543	373	423	536	187	198	124	325.463	347.449	344.253	283.019	219.587	149.701	278.245	0.64323	0.0667561	0.194623	no_diff (p.adj > 0.05, -1 <= log2FC <= 1)
Mm01G001544	544	501	611	298	515	313	474.669	411.518	392.423	451.014	571.147	377.874	446.441	-0.131785	0.653537	0.819121	no_diff (p.adj > 0.05, -1 <= log2FC <= 1)
Mm01G001545	28	63	35	24	18	7	24.4315	51.7478	22.4792	36.3233	19.9624	8.45085	27.2325	0.61656	0.43735	0.658215	no_diff (p.adj > 0.05, -1 <= log2FC <= 1)
Mm01G001546	38	37	41	40	32	22	33.1571	30.3916	26.3328	60.5388	35.4888	26.5598	35.4115	-0.441456	0.429494	0.65183	no_diff (p.adj > 0.05, -1 <= log2FC <= 1)
Mm01G001547	1079	1206	1141	207	153	112	941.486	990.6	732.822	313.288	169.681	135.214	547.182	2.11093	6.99236e-07	1.73016e-05	rich (p.adj < 0.05, log2FC >= 1)
Mm01G001548	416	378	469	116	155	209	362.983	310.487	301.222	175.563	171.899	252.318	262.412	0.699346	0.025605	0.0979483	no_diff (p.adj > 0.05, -1 <= log2FC <= 1)
Mm01G001549	0	0	2	0	0	0	0	0	1.28453	0	0	0	0.214088	0.917341	0.821271	NA	no_diff (p.adj > 0.05, -1 <= log2FC <= 1)
Mm01G001550	969	945	1039	322	413	450	845.505	776.217	667.312	487.337	458.027	543.269	629.611	0.620376	0.0105792	0.0503134	no_diff (p.adj > 0.05, -1 <= log2FC <= 1)
Mm01G001551	0	0	0	0	0	0	0	0	0	0	0	0	0	NA	NA	NA	no diff (express=0)
Mm01G001552	106	156	118	114	165	134	92.4907	128.137	75.7871	172.536	182.989	161.773	135.619	-0.805581	0.025229	0.0967791	no_diff (p.adj > 0.05, -1 <= log2FC <= 1)
Mm01G001553	13	32	10	22	0	43	11.3432	26.2846	6.42263	33.2963	0	51.9124	21.5432	-0.952081	0.507397	0.715884	no_diff (p.adj > 0.05, -1 <= log2FC <= 1)
Mm01G001554	32	70	70	66	20	45	27.9217	57.4975	44.9584	99.889	22.1805	54.3269	51.129	-0.429148	0.544052	0.743376	no_diff (p.adj > 0.05, -1 <= log2FC <= 1)
Mm01G001555	949	775	839	328	345	237	828.054	636.58	538.859	496.418	382.613	286.122	528.108	0.782767	0.0293932	0.108214	no_diff (p.adj > 0.05, -1 <= log2FC <= 1)
Mm01G001556	0	0	0	0	0	0	0	0	0	0	0	0	0	NA	NA	NA	no diff (express=0)
Mm01G001557	268	192	254	198	231	266	233.845	157.708	163.135	299.667	256.184	321.132	238.612	-0.661648	0.0396316	0.134039	no_diff (p.adj > 0.05, -1 <= log2FC <= 1)
Mm01G001558	220	238	387	67	133	74	191.962	195.492	248.556	101.402	147.5	89.3376	162.375	0.909281	0.0130198	0.0588498	no_diff (p.adj > 0.05, -1 <= log2FC <= 1)
Mm01G001559	0	0	0	0	0	0	0	0	0	0	0	0	0	NA	NA	NA	no diff (express=0)
Mm01G001560	0	0	0	0	0	0	0	0	0	0	0	0	0	NA	NA	NA	no diff (express=0)
Mm01G001561	0	19	94	64	393	68	0	15.6065	60.3728	96.8621	435.846	82.094	115.13	-3.01261	0.0248604	0.095716	no_diff (p.adj > 0.05, -1 <= log2FC <= 1)
Mm01G001562	1425	1461	1556	560	924	894	1243.39	1200.06	999.362	847.543	1024.74	1079.29	1065.73	0.221327	0.370799	0.599301	no_diff (p.adj > 0.05, -1 <= log2FC <= 1)
Mm01G001563	1145	1216	1380	438	686	670	999.075	998.814	886.323	662.9	760.79	808.867	852.795	0.368625	0.0986299	0.256164	no_diff (p.adj > 0.05, -1 <= log2FC <= 1)
Mm01G001564	9462	17377	18293	6815	10337	13658	8256.11	14273.4	11748.9	10314.3	11464	16488.8	12090.9	-0.158815	0.656396	0.820397	no_diff (p.adj > 0.05, -1 <= log2FC <= 1)
Mm01G001565	3452	3583	4783	1594	3057	2292	3012.06	2943.05	3071.95	2412.47	3390.29	2767.05	2932.81	0.0747448	0.757407	0.880723	no_diff (p.adj > 0.05, -1 <= log2FC <= 1)
Mm01G001566	0	0	0	0	0	0	0	0	0	0	0	0	0	NA	NA	NA	no diff (express=0)
Mm01G001567	168	134	149	78	65	88	146.589	110.067	95.6972	118.051	72.0865	106.239	108.122	0.251414	0.534409	0.73663	no_diff (p.adj > 0.05, -1 <= log2FC <= 1)
Mm01G001568	0	0	0	0	0	0	0	0	0	0	0	0	0	NA	NA	NA	no diff (express=0)
Mm01G001569	2	0	8	0	3	0	1.74511	0	5.13811	0	3.32707	0	1.70171	1.02724	0.738898	NA	no diff (express=0)
Mm01G001570	0	0	0	0	0	0	0	0	0	0	0	0	0	NA	NA	NA	no diff (express=0)
Mm01G001571	0	0	0	0	0	0	0	0	0	0	0	0	0	NA	NA	NA	no diff (express=0)
Mm01G001572	0	0	3	0	0	0	0	0	1.92679	0	0	0	0.321132	1.49114	0.71006	NA	no diff (express=0)
Mm01G001573	517	555	306	364	323	330	451.111	455.873	196.533	550.903	358.215	398.397	401.839	-0.24483	0.590737	0.778062	no_diff (p.adj > 0.05, -1 <= log2FC <= 1)
Mm01G001574	0	0	0	0	0	0	0	0	0	0	0	0	0	NA	NA	NA	no diff (express=0)
Mm01G001575	352	413	535	295	284	307	307.139	339.235	343.611	446.474	314.963	370.63	353.675	-0.191487	0.483476	0.696808	no_diff (p.adj > 0.05, -1 <= log2FC <= 1)
Mm01G001576	0	0	0	0	0	0	0	0	0	0	0	0	0	NA	NA	NA	no diff (express=0)
Mm01G001577	0	0	0	0	0	0	0	0	0	0	0	0	0	NA	NA	NA	no diff (express=0)
Mm01G001578	4	1	0	0	0	0	3.49022	0.821393	0	0	0	0	0.718602	2.61818	0.507954	NA	no diff (express=0)
Mm01G001579	621	971	1180	611	874	908	541.856	797.573	757.871	924.73	969.287	1096.2	847.919	-0.511556	0.0677522	0.196779	no_diff (p.adj > 0.05, -1 <= log2FC <= 1)
Mm01G001580	138	129	228	61	142	124	120.412	105.96	146.436	92.3217	157.481	149.701	128.719	-0.102176	0.792554	0.899506	no_diff (p.adj > 0.05, -1 <= log2FC <= 1)
Mm01G001581	127	135	203	74	108	108	110.814	110.888	130.379	111.997	119.775	130.385	119.04	-0.0404549	0.893314	0.95048	no_diff (p.adj > 0.05, -1 <= log2FC <= 1)
Mm01G001582	1580	930	2230	573	1111	286	1378.64	763.896	1432.25	867.218	1232.13	345.278	1003.23	0.548214	0.319519	0.548017	no_diff (p.adj > 0.05, -1 <= log2FC <= 1)
Mm01G001583	697	880	845	233	434	367	608.17	722.826	542.713	352.639	481.316	443.066	525.122	0.551551	0.0506208	0.159617	no_diff (p.adj > 0.05, -1 <= log2FC <= 1)
Mm01G001584	0	0	0	0	0	0	0	0	0	0	0	0	0	NA	NA	NA	no diff (express=0)
Mm01G001585	3	0	6	0	0	3	2.61766	0	3.85358	0	0	3.62179	1.68217	0.830825	0.786395	NA	no_diff (p.adj > 0.05, -1 <= log2FC <= 1)
Mm01G001586	0	0	0	0	0	0	0	0	0	0	0	0	0	NA	NA	NA	no diff (express=0)
Mm01G001587	3	0	17	13	100	292	2.61766	0	10.9185	19.6751	110.902	352.521	82.7725	-5.13601	9.02921e-05	0.00112079	down (p.adj < 0.05, log2FC <= -1)
Mm01G001588	4	0	6	0	0	5	3.49022	0	3.85358	0	0	6.03632	2.23002	0.278005	0.924764	NA	no_diff (p.adj > 0.05, -1 <= log2FC <= 1)
Mm01G001589	3620	1931	3072	634	1146	657	3158.65	1586.11	1973.03	959.54	1270.94	793.173	1623.57	1.15144	0.00364019	0.0218612	rich (p.adj < 0.05, log2FC >= 1)
Mm01G001590	46	31	93	13	29	11	40.1375	25.4632	59.7305	19.6751	32.1617	13.2799	31.7413	0.942724	0.159479	0.352825	no_diff (p.adj > 0.05, -1 <= log2FC <= 1)
Mm01G001591	334	420	215	70	107	126	291.433	344.985	138.087	105.943	118.666	152.115	191.871	1.03773	0.0283721	0.105379	no_diff (p.adj > 0.05, -1 <= log2FC <= 1)
Mm01G001592	365	560	578	377	432	360	318.482	459.98	371.228	570.578	479.098	434.615	438.997	-0.367696	0.211624	0.422957	no_diff (p.adj > 0.05, -1 <= log2FC <= 1)
Mm01G001593	89	136	167	89	88	112	77.6573	111.709	107.258	134.699	97.5941	135.214	110.689	-0.305808	0.406193	0.630853	no_diff (p.adj > 0.05, -1 <= log2FC <= 1)
Mm01G001594	274	376	453	280	240	233	239.08	308.844	290.945	423.772	266.166	281.293	301.683	-0.209026	0.533839	0.736238	no_diff (p.adj > 0.05, -1 <= log2FC <= 1)
Mm01G001595	40	46	19	32	27	9	34.9022	37.7841	12.203	48.431	29.9436	10.8654	29.0216	-0.0699698	0.932498	0.968333	no_diff (p.adj > 0.05, -1 <= log2FC <= 1)
Mm01G001596	650	616	669	285	277	266	567.16	505.978	429.674	431.339	307.2	321.132	427.081	0.505255	0.0876442	0.235788	no_diff (p.adj > 0.05, -1 <= log2FC <= 1)
Mm01G001597	530	683	597	160	286	284	462.454	561.012	383.431	242.155	317.181	342.863	384.849	0.639114	0.0424747	0.140825	no_diff (p.adj > 0.05, -1 <= log2FC <= 1)
Mm01G001598	2603	1718	1806	792	634	383	2271.26	1411.15	1159.93	1198.67	703.121	462.382	1201.09	1.03485	0.0340959	0.120266	no_diff (p.adj > 0.05, -1 <= log2FC <= 1)
Mm01G001599	1883	1429	1686	436	510	735	1643.02	1173.77	1082.86	659.873	565.602	887.339	1002.08	0.883981	0.00866618	0.0433873	no_diff (p.adj > 0.05, -1 <= log2FC <= 1)
Mm01G001600	375	312	620	185	320	291	327.208	256.275	398.203	279.992	354.888	351.314	327.98	-0.00686906	0.982657	0.991646	no_diff (p.adj > 0.05, -1 <= log2FC <= 1)
Mm01G001601	0	0	0	0	0	0	0	0	0	0	0	0	0	NA	NA	NA	no diff (express=0)
Mm01G001602	153	183	194	70	112	105	133.501	150.315	124.599	105.943	124.211	126.763	127.555	0.191428	0.525182	0.730074	no_diff (p.adj > 0.05, -1 <= log2FC <= 1)
Mm01G001603	295	635	660	49	189	268	257.403	521.585	423.894	74.16	209.605	323.547	301.699	0.984383	0.106086	0.269197	no_diff (p.adj > 0.05, -1 <= log2FC <= 1)
Mm01G001604	521	666	685	350	250	233	454.601	547.048	439.95	529.715	277.256	281.293	421.644	0.4075	0.295369	0.522743	no_diff (p.adj > 0.05, -1 <= log2FC <= 1)
Mm01G001605	2333	2046	2760	1280	3398	2566	2035.67	1680.57	1772.65	1937.24	3768.46	3097.84	2382.07	-0.681855	0.049002	0.155704	no_diff (p.adj > 0.05, -1 <= log2FC <= 1)
Mm01G001606	555	801	879	518	868	803	484.268	657.936	564.549	783.978	962.633	969.433	737.133	-0.670644	0.0112028	0.0525746	no_diff (p.adj > 0.05, -1 <= log2FC <= 1)
Mm01G001607	2083	1797	2123	807	959	1344	1817.53	1476.04	1363.53	1221.37	1063.55	1622.56	1427.43	0.253039	0.398233	0.623937	no_diff (p.adj > 0.05, -1 <= log2FC <= 1)
Mm01G001608	90	183	95	110	107	133	78.5299	150.315	61.015	166.482	118.666	160.566	122.596	-0.621337	0.206906	0.417033	no_diff (p.adj > 0.05, -1 <= log2FC <= 1)
Mm01G001609	34	24	42	56	20	6	29.6668	19.7134	26.9751	84.7543	22.1805	7.24359	31.7556	-0.57234	0.547467	0.745986	no_diff (p.adj > 0.05, -1 <= log2FC <= 1)
Mm01G001610	0	8	0	13	2	4	0	6.57115	0	19.6751	2.21805	4.82906	5.54889	-2.02482	0.338267	0.566428	no_diff (p.adj > 0.05, -1 <= log2FC <= 1)
Mm01G001611	88	95	102	147	107	84	76.7848	78.0324	65.5109	222.48	118.666	101.41	110.481	-1.00337	0.028849	0.106688	no_diff (p.adj > 0.05, -1 <= log2FC <= 1)
Mm01G001612	48	65	144	15	18	6	41.8826	53.3906	92.4859	22.7021	19.9624	7.24359	39.6112	1.92098	0.00521278	0.0292565	rich (p.adj < 0.05, log2FC >= 1)
Mm01G001613	10941	3321	5230	5688	15213	19608	9546.62	2727.85	3359.04	8608.62	16871.6	23672	10797.6	-1.65266	0.00785579	0.0401558	down (p.adj < 0.05, log2FC <= -1)
Mm01G001614	5382	5963	8680	2509	4499	4116	4696.09	4897.97	5574.85	3797.3	4989.5	4969.1	4820.8	0.140966	0.562886	0.757563	no_diff (p.adj > 0.05, -1 <= log2FC <= 1)
Mm01G001615	1816	1414	1849	29	291	167	1584.56	1161.45	1187.54	43.8906	322.726	201.613	750.297	2.78891	3.25237e-05	0.000474415	rich (p.adj < 0.05, log2FC >= 1)
Mm01G001616	0	0	0	0	2	0	0	0	0	0	2.21805	0	0.369675	-2.40859	0.5524	NA	no diff (express=0)
Mm01G001617	12	34	66	29	49	26	10.4707	27.9274	42.3894	43.8906	54.3422	31.3889	35.0682	-0.676045	0.336281	0.564439	no_diff (p.adj > 0.05, -1 <= log2FC <= 1)
Mm01G001618	144	76	86	34	62	28	125.648	62.4259	55.2346	51.458	68.7595	33.8034	66.2215	0.656161	0.251374	0.471691	no_diff (p.adj > 0.05, -1 <= log2FC <= 1)
Mm01G001619	1333	1406	1097	414	1162	1573	1163.11	1154.88	704.563	626.577	1288.69	1899.03	1139.47	-0.33614	0.499235	0.708991	no_diff (p.adj > 0.05, -1 <= log2FC <= 1)
Mm01G001620	1454	905	558	156	182	113	1268.69	743.361	358.383	236.101	201.842	136.421	490.8	2.0455	0.000179277	0.00195367	rich (p.adj < 0.05, log2FC >= 1)
Mm01G001621	2	0	1	0	0	0	1.74511	0	0.642263	0	0	0	0.397895	1.76822	0.657879	NA	no diff (express=0)
Mm01G001622	84	42	65	37	53	66	73.2946	34.4985	41.7471	55.9984	58.7783	79.6794	57.3327	-0.382904	0.453853	0.671423	no_diff (p.adj > 0.05, -1 <= log2FC <= 1)
Mm01G001623	380	514	478	210	300	315	331.571	422.196	307.002	317.829	332.707	380.288	348.599	0.0403279	0.885281	0.947134	no_diff (p.adj > 0.05, -1 <= log2FC <= 1)
Mm01G001624	141	56	144	24	95	104	123.03	45.998	92.4859	36.3233	105.357	125.555	88.125	-0.0348178	0.957652	0.980423	no_diff (p.adj > 0.05, -1 <= log2FC <= 1)
Mm01G001625	96	95	150	36	76	59	83.7652	78.0324	96.3395	54.4849	84.2858	71.2286	78.0227	0.293624	0.442997	0.662385	no_diff (p.adj > 0.05, -1 <= log2FC <= 1)
Mm01G001626	116	69	16	85	15	96	101.216	56.6761	10.2762	128.645	16.6354	115.897	71.5577	-0.635628	0.525157	0.730074	no_diff (p.adj > 0.05, -1 <= log2FC <= 1)
Mm01G001627	242	53	8	2	12	14	211.158	43.5338	5.13811	3.02694	13.3083	16.9017	48.8445	2.95652	0.0169472	0.0718609	no_diff (p.adj > 0.05, -1 <= log2FC <= 1)
Mm01G001628	56	34	31	23	0	8	48.863	27.9274	19.9102	34.8098	0	9.65811	23.5281	1.13259	0.390993	0.617327	no_diff (p.adj > 0.05, -1 <= log2FC <= 1)
Mm01G001629	967	1132	1211	483	510	550	843.76	929.817	777.781	731.006	565.602	663.995	751.994	0.380609	0.11804	0.288929	no_diff (p.adj > 0.05, -1 <= log2FC <= 1)
Mm01G001630	1077	1061	1531	364	479	508	939.741	871.498	983.305	550.903	531.222	613.29	748.327	0.721084	0.000753464	0.00622429	no_diff (p.adj > 0.05, -1 <= log2FC <= 1)
Mm01G001631	2128	1827	6094	811	1955	862	1856.8	1500.69	3913.95	1227.42	2168.14	1040.66	1951.28	0.712869	0.168368	0.365953	no_diff (p.adj > 0.05, -1 <= log2FC <= 1)
Mm01G001632	68	59	105	14	8	20	59.3337	48.4622	67.4376	21.1886	8.87219	24.1453	38.2399	1.7035	0.00425362	0.0247606	rich (p.adj < 0.05, log2FC >= 1)
Mm01G001633	3506	166	1929	78	165	46	3059.18	136.351	1238.93	118.051	182.989	55.5342	798.504	3.63609	0.000109982	0.00131646	rich (p.adj < 0.05, log2FC >= 1)
Mm01G001634	22784	39363	51332	11282	28739	19089	19880.3	32332.5	32968.7	17075	31872.2	23045.5	26195.7	0.242675	0.527325	0.731422	no_diff (p.adj > 0.05, -1 <= log2FC <= 1)
Mm01G001635	16	6	36	8	0	8	13.9609	4.92836	23.1215	12.1078	0	9.65811	10.6294	0.965708	0.486839	0.699372	no_diff (p.adj > 0.05, -1 <= log2FC <= 1)
Mm01G001636	0	0	0	0	0	0	0	0	0	0	0	0	0	NA	NA	NA	no diff (express=0)
Mm01G001637	0	0	0	0	0	0	0	0	0	0	0	0	0	NA	NA	NA	no diff (express=0)
Mm01G001638	1945	2333	3158	2004	1432	852	1697.12	1916.31	2028.27	3032.99	1588.12	1028.59	1881.9	-0.00168251	0.997112	0.998744	no_diff (p.adj > 0.05, -1 <= log2FC <= 1)
Mm01G001639	259	387	472	161	130	150	225.992	317.879	303.148	243.669	144.173	181.09	235.992	0.577521	0.108417	0.272806	no_diff (p.adj > 0.05, -1 <= log2FC <= 1)
Mm01G001640	32	4	121	3	10	0	27.9217	3.28557	77.7139	4.54041	11.0902	0	20.7586	2.79448	0.0580141	0.176041	no_diff (p.adj > 0.05, -1 <= log2FC <= 1)
Mm01G001641	0	0	0	0	0	0	0	0	0	0	0	0	0	NA	NA	NA	no diff (express=0)
Mm01G001642	0	0	0	0	0	0	0	0	0	0	0	0	0	NA	NA	NA	no diff (express=0)
Mm01G001643	8	2	3	0	3	1	6.98043	1.64279	1.92679	0	3.32707	1.20726	2.51406	1.1624	0.52312	NA	no diff (express=0)
Mm01G001644	759	697	883	270	548	476	662.269	572.511	567.119	408.637	607.745	574.658	565.49	0.178062	0.534467	0.73663	no_diff (p.adj > 0.05, -1 <= log2FC <= 1)
Mm01G001645	84	82	106	52	73	105	73.2946	67.3543	68.0799	78.7004	80.9587	126.763	82.5251	-0.458595	0.245099	0.463777	no_diff (p.adj > 0.05, -1 <= log2FC <= 1)
Mm01G001646	46	95	179	76	60	31	40.1375	78.0324	114.965	115.024	66.5414	37.4252	75.3542	0.0964822	0.882336	0.94553	no_diff (p.adj > 0.05, -1 <= log2FC <= 1)
Mm01G001647	6	8	0	5	0	0	5.23533	6.57115	0	7.56735	0	0	3.22897	0.660381	0.816785	NA	no_diff (p.adj > 0.05, -1 <= log2FC <= 1)
Mm01G001648	207	320	412	235	378	169	180.619	262.846	264.612	355.665	419.211	204.028	281.164	-0.466708	0.258319	0.48045	no_diff (p.adj > 0.05, -1 <= log2FC <= 1)
Mm01G001649	169	101	104	39	127	268	147.462	82.9607	66.7954	59.0253	140.846	323.547	136.773	-0.81896	0.247204	0.466444	no_diff (p.adj > 0.05, -1 <= log2FC <= 1)
Mm01G001650	277	330	459	242	359	273	241.698	271.06	294.799	366.26	398.139	329.583	316.923	-0.43731	0.0848326	0.23042	no_diff (p.adj > 0.05, -1 <= log2FC <= 1)
Mm01G001651	19	22	44	17	205	400	16.5785	18.0707	28.2596	25.729	227.35	482.906	133.149	-3.54653	0.000114233	0.00135864	down (p.adj < 0.05, log2FC <= -1)
Mm01G001652	0	0	4	1	0	17	0	0	2.56905	1.51347	0	20.5235	4.101	-3.06472	0.271077	0.494887	no_diff (p.adj > 0.05, -1 <= log2FC <= 1)
Mm01G001653	16	23	21	21	39	11	13.9609	18.892	13.4875	31.7829	43.2519	13.2799	22.4425	-0.932964	0.190425	0.39596	no_diff (p.adj > 0.05, -1 <= log2FC <= 1)
Mm01G001654	0	0	0	0	0	0	0	0	0	0	0	0	0	NA	NA	NA	no diff (express=0)
Mm01G001655	9	7	5	2	6	4	7.85299	5.74975	3.21132	3.02694	6.65414	4.82906	5.2207	0.186675	0.86571	0.937665	no_diff (p.adj > 0.05, -1 <= log2FC <= 1)
Mm01G001656	0	0	0	0	0	0	0	0	0	0	0	0	0	NA	NA	NA	no diff (express=0)
Mm01G001657	14	9	22	15	17	12	12.2158	7.39254	14.1298	22.7021	18.8534	14.4872	14.9635	-0.722561	0.306911	0.535095	no_diff (p.adj > 0.05, -1 <= log2FC <= 1)
Mm01G001658	201	178	522	117	223	162	175.383	146.208	335.261	177.076	247.312	195.577	212.803	0.0839737	0.853763	0.930353	no_diff (p.adj > 0.05, -1 <= log2FC <= 1)
Mm01G001659	0	0	2	0	0	0	0	0	1.28453	0	0	0	0.214088	0.917341	0.821271	NA	no_diff (p.adj > 0.05, -1 <= log2FC <= 1)
Mm01G001660	3	13	0	2	0	0	2.61766	10.6781	0	3.02694	0	0	2.72045	2.18489	0.451342	NA	no diff (express=0)
Mm01G001661	0	0	0	0	0	0	0	0	0	0	0	0	0	NA	NA	NA	no diff (express=0)
Mm01G001662	172	342	72	64	11	38	150.079	280.917	46.243	96.8621	12.1993	45.876	105.363	1.62774	0.0713332	0.204062	no_diff (p.adj > 0.05, -1 <= log2FC <= 1)
Mm01G001663	19	14	48	3	31	26	16.5785	11.4995	30.8286	4.54041	34.3797	31.3889	21.5359	-0.26018	0.781497	0.893832	no_diff (p.adj > 0.05, -1 <= log2FC <= 1)
Mm01G001664	734	759	2143	339	1915	2594	640.455	623.438	1376.37	513.066	2123.78	3131.64	1401.46	-1.1275	0.10174	0.261642	no_diff (p.adj > 0.05, -1 <= log2FC <= 1)
Mm01G001665	0	0	4	4	14	18	0	0	2.56905	6.05388	15.5263	21.7308	7.64667	-3.98609	0.0146923	0.0644065	no_diff (p.adj > 0.05, -1 <= log2FC <= 1)
Mm01G001666	0	0	0	0	0	0	0	0	0	0	0	0	0	NA	NA	NA	no diff (express=0)
Mm01G001667	46	55	26	16	12	28	40.1375	45.1766	16.6988	24.2155	13.3083	33.8034	28.89	0.51481	0.472169	0.687054	no_diff (p.adj > 0.05, -1 <= log2FC <= 1)
Mm01G001668	52	49	11	4	18	11	45.3728	40.2483	7.0649	6.05388	19.9624	13.2799	21.997	1.22279	0.202612	0.41171	no_diff (p.adj > 0.05, -1 <= log2FC <= 1)
Mm01G001669	56	24	106	31	18	7	48.863	19.7134	68.0799	46.9176	19.9624	8.45085	35.3312	0.871059	0.308705	0.536984	no_diff (p.adj > 0.05, -1 <= log2FC <= 1)
Mm01G001670	14	13	39	5	0	0	12.2158	10.6781	25.0483	7.56735	0	0	9.25158	2.72852	0.101738	0.261642	no_diff (p.adj > 0.05, -1 <= log2FC <= 1)
Mm01G001671	0	3	5	0	2	0	0	2.46418	3.21132	0	2.21805	0	1.31559	1.32262	0.677593	NA	no diff (express=0)
Mm01G001672	458	634	1800	531	3084	2763	399.63	520.763	1156.07	803.653	3420.23	3335.67	1606	-1.86401	0.00535349	0.0298731	down (p.adj < 0.05, log2FC <= -1)
Mm01G001673	246	229	789	123	439	243	214.648	188.099	506.746	186.157	486.861	293.365	312.646	-0.0877423	0.880285	0.944378	no_diff (p.adj > 0.05, -1 <= log2FC <= 1)
Mm01G001674	969	956	2488	368	348	119	845.505	785.252	1597.95	556.957	385.94	143.664	719.212	1.57221	0.00739137	0.0382952	rich (p.adj < 0.05, log2FC >= 1)
Mm01G001675	136	105	105	43	61	36	118.667	86.2463	67.4376	65.0792	67.6504	43.4615	74.7571	0.626917	0.167118	0.364051	no_diff (p.adj > 0.05, -1 <= log2FC <= 1)
Mm01G001676	630	371	252	57	16	15	549.709	304.737	161.85	86.2678	17.7444	18.109	189.736	3.06668	0.00010591	0.00127649	rich (p.adj < 0.05, log2FC >= 1)
Mm01G001677	585	733	437	93	154	138	510.444	602.081	280.669	140.753	170.79	166.602	311.89	1.54114	0.000143622	0.00164037	rich (p.adj < 0.05, log2FC >= 1)
Mm01G001678	324	445	621	752	1661	951	282.708	365.52	398.846	1138.13	1842.09	1148.11	862.567	-1.97898	9.63415e-09	3.87648e-07	down (p.adj < 0.05, log2FC <= -1)
Mm01G001679	236	201	375	178	148	117	205.923	165.1	240.849	269.398	164.135	141.25	197.776	0.0937435	0.817249	0.911134	no_diff (p.adj > 0.05, -1 <= log2FC <= 1)
Mm01G001680	559	733	914	409	505	669	487.758	602.081	587.029	619.009	560.057	807.66	610.599	-0.24445	0.388741	0.615518	no_diff (p.adj > 0.05, -1 <= log2FC <= 1)
Mm01G001681	0	0	0	0	0	0	0	0	0	0	0	0	0	NA	NA	NA	no diff (express=0)
Mm01G001682	0	0	0	0	0	0	0	0	0	0	0	0	0	NA	NA	NA	no diff (express=0)
Mm01G001683	17	0	12	6	49	20	14.8334	0	7.70716	9.08082	54.3422	24.1453	18.3515	-1.96368	0.148975	0.336788	no_diff (p.adj > 0.05, -1 <= log2FC <= 1)
Mm01G001684	140	124	163	74	42	21	122.158	101.853	104.689	111.997	46.579	25.3525	85.4379	0.844748	0.182152	0.384894	no_diff (p.adj > 0.05, -1 <= log2FC <= 1)
Mm01G001685	915	1218	1614	550	1163	1101	798.387	1000.46	1036.61	832.409	1289.79	1329.2	1047.81	-0.283978	0.370085	0.598591	no_diff (p.adj > 0.05, -1 <= log2FC <= 1)
Mm01G001686	206	222	443	204	308	146	179.746	182.349	284.523	308.748	341.579	176.261	245.534	-0.352939	0.405235	0.63004	no_diff (p.adj > 0.05, -1 <= log2FC <= 1)
Mm01G001687	3	12	23	5	5	4	2.61766	9.85672	14.7721	7.56735	5.54512	4.82906	7.53133	0.620422	0.567219	0.76081	no_diff (p.adj > 0.05, -1 <= log2FC <= 1)
Mm01G001688	0	0	0	0	0	0	0	0	0	0	0	0	0	NA	NA	NA	no diff (express=0)
Mm01G001689	3	0	13	27	14	0	2.61766	0	8.34942	40.8637	15.5263	0	11.2262	-2.34727	0.22925	0.445078	no_diff (p.adj > 0.05, -1 <= log2FC <= 1)
Mm01G001690	0	0	0	0	0	0	0	0	0	0	0	0	0	NA	NA	NA	no diff (express=0)
Mm01G001691	31	48	60	20	38	39	27.0492	39.4269	38.5358	30.2694	42.1429	47.0833	37.4179	-0.189178	0.702149	0.849256	no_diff (p.adj > 0.05, -1 <= log2FC <= 1)
Mm01G001692	20	33	30	45	34	14	17.4511	27.106	19.2679	68.1062	37.7068	16.9017	31.0899	-0.936829	0.189826	0.39506	no_diff (p.adj > 0.05, -1 <= log2FC <= 1)
Mm01G001693	95	90	13	97	7	0	82.8926	73.9254	8.34942	146.807	7.76317	0	53.2895	0.0980285	NA	NA	no_diff (p.adj > 0.05, -1 <= log2FC <= 1)
Mm01G001694	0	0	0	0	0	0	0	0	0	0	0	0	0	NA	NA	NA	no diff (express=0)
Mm01G001695	40	36	7	28	2	0	34.9022	29.5702	4.49584	42.3772	2.21805	0	18.9272	0.637913	0.698035	0.846888	no_diff (p.adj > 0.05, -1 <= log2FC <= 1)
Mm01G001696	683	1213	541	90	79	127	595.955	996.35	347.464	136.212	87.6129	153.323	386.153	2.36347	3.36372e-06	6.70028e-05	rich (p.adj < 0.05, log2FC >= 1)
Mm01G001697	277	357	332	145	70	63	241.698	293.237	213.231	219.453	77.6317	76.0576	186.885	1.00819	0.0652772	0.191655	no_diff (p.adj > 0.05, -1 <= log2FC <= 1)
Mm01G001698	32	102	30	4	0	9	27.9217	83.7821	19.2679	6.05388	0	10.8654	24.6485	2.96077	0.0142651	0.0630218	no_diff (p.adj > 0.05, -1 <= log2FC <= 1)
Mm01G001699	110	573	83	24	32	65	95.981	470.658	53.3079	36.3233	35.4888	78.4722	128.372	2.04307	0.0198261	0.0809954	no_diff (p.adj > 0.05, -1 <= log2FC <= 1)
Mm01G001700	3	5	2	0	0	0	2.61766	4.10697	1.28453	0	0	0	1.33486	3.51653	0.227289	NA	no diff (express=0)
Mm01G001701	126	170	288	107	157	121	109.942	139.637	184.972	161.941	174.117	146.079	152.781	-0.14782	0.67753	0.83283	no_diff (p.adj > 0.05, -1 <= log2FC <= 1)
Mm01G001702	3793	6246	5600	738	567	1586	3309.6	5130.42	3596.67	1116.94	628.816	1914.72	2616.2	1.71738	0.000427963	0.00396351	rich (p.adj < 0.05, log2FC >= 1)
Mm01G001703	0	0	0	0	0	0	0	0	0	0	0	0	0	NA	NA	NA	no diff (express=0)
Mm01G001704	0	0	0	0	0	0	0	0	0	0	0	0	0	NA	NA	NA	no diff (express=0)
Mm01G001705	0	0	0	0	0	0	0	0	0	0	0	0	0	NA	NA	NA	no diff (express=0)
Mm01G001706	0	0	0	0	0	0	0	0	0	0	0	0	0	NA	NA	NA	no diff (express=0)
Mm01G001707	0	0	0	0	0	0	0	0	0	0	0	0	0	NA	NA	NA	no diff (express=0)
Mm01G001708	0	0	0	0	0	0	0	0	0	0	0	0	0	NA	NA	NA	no diff (express=0)
Mm01G001709	4	6	4	0	0	2	3.49022	4.92836	2.56905	0	0	2.41453	2.23369	2.15568	0.306048	NA	no diff (express=0)
Mm01G001710	0	0	0	2	2	0	0	0	0	3.02694	2.21805	0	0.874165	-3.61668	0.36244	NA	no diff (express=0)
Mm01G001711	17	3	4	5	3	1	14.8334	2.46418	2.56905	7.56735	3.32707	1.20726	5.32806	0.727695	0.606971	0.788114	no_diff (p.adj > 0.05, -1 <= log2FC <= 1)
Mm01G001712	33	61	14	23	47	89	28.7943	50.105	8.99169	34.8098	52.1241	107.447	47.0452	-1.15123	0.157886	0.350539	no_diff (p.adj > 0.05, -1 <= log2FC <= 1)
Mm01G001713	0	0	0	0	0	0	0	0	0	0	0	0	0	NA	NA	NA	no diff (express=0)
Mm01G001714	0	0	0	0	0	0	0	0	0	0	0	0	0	NA	NA	NA	no diff (express=0)
Mm01G001715	2	15	0	3	0	0	1.74511	12.3209	0	4.54041	0	0	3.10107	1.66442	0.568266	NA	no diff (express=0)
Mm01G001716	0	0	0	0	0	0	0	0	0	0	0	0	0	NA	NA	NA	no diff (express=0)
Mm01G001717	0	0	0	0	0	0	0	0	0	0	0	0	0	NA	NA	NA	no diff (express=0)
Mm01G001718	0	0	0	0	0	0	0	0	0	0	0	0	0	NA	NA	NA	no diff (express=0)
Mm01G001719	0	0	0	0	0	0	0	0	0	0	0	0	0	NA	NA	NA	no diff (express=0)
Mm01G001720	477	1306	326	68	130	68	416.208	1072.74	209.378	102.916	144.173	82.094	337.918	2.36618	0.000307593	0.00301529	rich (p.adj < 0.05, log2FC >= 1)
Mm01G001721	0	0	0	0	0	0	0	0	0	0	0	0	0	NA	NA	NA	no diff (express=0)
Mm01G001722	23	22	21	4	6	3	20.0687	18.0707	13.4875	6.05388	6.65414	3.62179	11.3261	1.65864	0.0451001	0.146637	no_diff (p.adj > 0.05, -1 <= log2FC <= 1)
Mm01G001723	0	0	0	0	0	0	0	0	0	0	0	0	0	NA	NA	NA	no diff (express=0)
Mm01G001724	25	35	36	5	4	2	21.8139	28.7488	23.1215	7.56735	4.43609	2.41453	14.6837	2.38266	0.00384486	0.0228542	rich (p.adj < 0.05, log2FC >= 1)
Mm01G001725	2	12	1	0	0	0	1.74511	9.85672	0.642263	0	0	0	2.04068	4.12917	0.148701	NA	no diff (express=0)
Mm01G001726	31	259	99	8	4	7	27.0492	212.741	63.5841	12.1078	4.43609	8.45085	54.7281	3.61646	0.000103738	0.00125551	rich (p.adj < 0.05, log2FC >= 1)
Mm01G001727	0	0	0	0	0	0	0	0	0	0	0	0	0	NA	NA	NA	no diff (express=0)
Mm01G001728	0	3	0	0	0	0	0	2.46418	0	0	0	0	0.410697	1.81213	0.649735	NA	no diff (express=0)
Mm01G001729	87	127	117	101	159	68	75.9122	104.317	75.1448	152.86	176.335	82.094	111.111	-0.687982	0.130971	0.309881	no_diff (p.adj > 0.05, -1 <= log2FC <= 1)
Mm01G001730	132	71	352	87	90	0	115.177	58.3189	226.077	131.672	99.8121	0	105.176	0.788834	0.553439	0.750565	no_diff (p.adj > 0.05, -1 <= log2FC <= 1)
Mm01G001731	0	0	0	1	0	0	0	0	0	1.51347	0	0	0.252245	-1.67451	0.681534	NA	no diff (express=0)
Mm01G001732	35	65	33	26	36	54	30.5394	53.3906	21.1947	39.3502	39.9249	65.1923	41.5987	-0.463557	0.44065	0.660786	no_diff (p.adj > 0.05, -1 <= log2FC <= 1)
Mm01G001733	29	64	22	241	832	1385	25.3041	52.5692	14.1298	364.746	922.708	1672.06	508.586	-5.01153	1.43585e-12	1.24761e-10	down (p.adj < 0.05, log2FC <= -1)
Mm01G001734	29	33	32	13	22	17	25.3041	27.106	20.5524	19.6751	24.3985	20.5235	22.9266	0.169002	0.75899	0.881505	no_diff (p.adj > 0.05, -1 <= log2FC <= 1)
Mm01G001735	0	3	8	10	22	12	0	2.46418	5.13811	15.1347	24.3985	14.4872	10.2704	-2.79362	0.0199303	0.0813012	no_diff (p.adj > 0.05, -1 <= log2FC <= 1)
Mm01G001736	0	0	0	0	0	0	0	0	0	0	0	0	0	NA	NA	NA	no diff (express=0)
Mm01G001737	0	0	0	0	0	0	0	0	0	0	0	0	0	NA	NA	NA	no diff (express=0)
Mm01G001738	56	20	21	17	84	62	48.863	16.4279	13.4875	25.729	93.158	74.8504	45.4193	-1.30711	0.102093	0.262318	no_diff (p.adj > 0.05, -1 <= log2FC <= 1)
Mm01G001739	0	0	0	0	0	0	0	0	0	0	0	0	0	NA	NA	NA	no diff (express=0)
Mm01G001740	488	823	659	117	100	44	425.806	676.007	423.252	177.076	110.902	53.1196	311.027	2.16402	4.50983e-05	0.000628732	rich (p.adj < 0.05, log2FC >= 1)
Mm01G001741	616	1020	964	227	293	79	537.493	837.821	619.142	343.558	324.944	95.3739	459.722	1.38525	0.0123757	0.0566258	no_diff (p.adj > 0.05, -1 <= log2FC <= 1)
Mm01G001742	0	0	0	0	0	0	0	0	0	0	0	0	0	NA	NA	NA	no diff (express=0)
Mm01G001743	0	0	0	0	0	0	0	0	0	0	0	0	0	NA	NA	NA	no diff (express=0)
Mm01G001744	0	0	0	0	0	0	0	0	0	0	0	0	0	NA	NA	NA	no diff (express=0)
Mm01G001745	0	0	0	4	1	22	0	0	0	6.05388	1.10902	26.5598	5.62045	-6.30718	0.00689679	0.0362862	down (p.adj < 0.05, log2FC <= -1)
Mm01G001746	381	638	473	265	99	179	332.443	524.049	303.791	401.07	109.793	216.1	314.541	0.676548	0.229403	0.445223	no_diff (p.adj > 0.05, -1 <= log2FC <= 1)
Mm01G001747	0	0	0	0	0	0	0	0	0	0	0	0	0	NA	NA	NA	no diff (express=0)
Mm01G001748	67	68	30	5	4	9	58.4611	55.8547	19.2679	7.56735	4.43609	10.8654	26.0754	2.54785	0.00160781	0.0114679	rich (p.adj < 0.05, log2FC >= 1)
Mm01G001749	0	0	0	0	0	0	0	0	0	0	0	0	0	NA	NA	NA	no diff (express=0)
Mm01G001750	534	564	753	107	313	227	465.944	463.266	483.624	161.941	347.124	274.049	365.991	0.848762	0.0251509	0.0965785	no_diff (p.adj > 0.05, -1 <= log2FC <= 1)
Mm01G001751	534	586	581	166	186	209	465.944	481.336	373.155	251.236	206.278	252.318	338.378	0.895973	0.00110087	0.00848576	no_diff (p.adj > 0.05, -1 <= log2FC <= 1)
Mm01G001752	14	14	15	51	150	70	12.2158	11.4995	9.63395	77.187	166.354	84.5085	60.233	-3.30629	4.05378e-09	1.79092e-07	down (p.adj < 0.05, log2FC <= -1)
Mm01G001753	1139	1136	1097	314	415	519	993.839	933.103	704.563	475.23	460.245	626.57	698.925	0.751872	0.0116299	0.0540745	no_diff (p.adj > 0.05, -1 <= log2FC <= 1)
Mm01G001754	2	0	4	0	0	0	1.74511	0	2.56905	0	0	0	0.719027	2.63126	0.505792	NA	no diff (express=0)
Mm01G001755	0	0	14	0	0	0	0	0	8.99169	0	0	0	1.49861	3.69299	0.347332	NA	no diff (express=0)
Mm01G001756	0	0	0	0	0	0	0	0	0	0	0	0	0	NA	NA	NA	no diff (express=0)
Mm01G001757	0	0	0	0	0	0	0	0	0	0	0	0	0	NA	NA	NA	no diff (express=0)
Mm01G001758	20	93	41	19	19	77	17.4511	76.3896	26.3328	28.7559	21.0714	92.9593	43.8267	-0.250597	0.777523	0.891685	no_diff (p.adj > 0.05, -1 <= log2FC <= 1)
Mm01G001759	51	42	65	18	33	14	44.5003	34.4985	41.7471	27.2425	36.5978	16.9017	33.5813	0.578142	0.29438	0.521493	no_diff (p.adj > 0.05, -1 <= log2FC <= 1)
Mm01G001760	494	532	428	204	146	146	431.042	436.981	274.889	308.748	161.917	176.261	298.306	0.823154	0.0511451	0.160717	no_diff (p.adj > 0.05, -1 <= log2FC <= 1)
Mm01G001761	154	285	567	101	2	2	134.373	234.097	364.163	152.86	2.21805	2.41453	148.354	2.22269	0.0994964	0.257825	no_diff (p.adj > 0.05, -1 <= log2FC <= 1)
Mm01G001762	605	399	43	149	13	9	527.895	327.736	27.6173	225.507	14.4173	10.8654	189.006	1.81906	0.149258	0.337223	no_diff (p.adj > 0.05, -1 <= log2FC <= 1)
Mm01G001763	177	202	0	192	0	0	154.442	165.921	0	290.586	0	0	101.825	0.141044	NA	NA	no_diff (p.adj > 0.05, -1 <= log2FC <= 1)
Mm01G001764	34	38	45	35	52	46	29.6668	31.2129	28.9018	52.9715	57.6692	55.5342	42.6594	-0.890203	0.0308257	0.111813	no_diff (p.adj > 0.05, -1 <= log2FC <= 1)
Mm01G001765	14	18	14	8	1	3	12.2158	14.7851	8.99169	12.1078	1.10902	3.62179	8.80518	1.13152	0.316331	0.544611	no_diff (p.adj > 0.05, -1 <= log2FC <= 1)
Mm01G001766	0	0	0	0	0	0	0	0	0	0	0	0	0	NA	NA	NA	no diff (express=0)
Mm01G001767	29	33	1	27	0	0	25.3041	27.106	0.642263	40.8637	0	0	15.6527	0.382311	0.861277	0.934877	no_diff (p.adj > 0.05, -1 <= log2FC <= 1)
Mm01G001768	215	297	74	71	15	27	187.599	243.954	47.5275	107.456	16.6354	32.5961	105.961	1.61803	0.0650855	0.191199	no_diff (p.adj > 0.05, -1 <= log2FC <= 1)
Mm01G001769	252	244	91	133	58	53	219.884	200.42	58.446	201.292	64.3234	63.985	134.725	0.540846	0.458598	0.675495	no_diff (p.adj > 0.05, -1 <= log2FC <= 1)
Mm01G001770	354	320	240	97	92	67	308.884	262.846	154.143	146.807	102.03	80.8867	175.933	1.1405	0.0119609	0.0551721	no_diff (p.adj > 0.05, -1 <= log2FC <= 1)
Mm01G001771	0	0	0	2	1	0	0	0	0	3.02694	1.10902	0	0.689327	-3.26668	0.412796	NA	no diff (express=0)
Mm01G001772	469	72	492	42	148	31	409.228	59.1403	315.994	63.5657	164.135	37.4252	174.915	1.56306	0.0615243	0.183374	no_diff (p.adj > 0.05, -1 <= log2FC <= 1)
Mm01G001773	37	61	81	14	142	164	32.2845	50.105	52.0233	21.1886	157.481	197.991	85.179	-1.4879	0.0654801	0.192186	no_diff (p.adj > 0.05, -1 <= log2FC <= 1)
Mm01G001774	0	0	0	0	0	0	0	0	0	0	0	0	0	NA	NA	NA	no diff (express=0)
Mm01G001775	13	30	11	0	3	4	11.3432	24.6418	7.0649	0	3.32707	4.82906	8.53434	2.35811	0.0642823	0.189393	no_diff (p.adj > 0.05, -1 <= log2FC <= 1)
Mm01G001776	4577	6878	5023	1519	2604	2994	3993.68	5649.54	3226.09	2298.96	2887.9	3614.55	3611.79	0.547962	0.122332	0.296194	no_diff (p.adj > 0.05, -1 <= log2FC <= 1)
Mm01G001777	70	31	24	148	9	9	61.0788	25.4632	15.4143	223.994	9.98121	10.8654	57.7994	-1.26232	NA	NA	no diff (express=0)
Mm01G001778	0	0	0	0	0	0	0	0	0	0	0	0	0	NA	NA	NA	no diff (express=0)
Mm01G001779	78	76	152	34	23	21	68.0592	62.4259	97.624	51.458	25.5075	25.3525	55.0712	1.17011	0.0283693	0.105379	no_diff (p.adj > 0.05, -1 <= log2FC <= 1)
Mm01G001780	261	256	152	44	239	190	227.737	210.277	97.624	66.5927	265.057	229.38	182.778	-0.0697406	0.913385	0.959307	no_diff (p.adj > 0.05, -1 <= log2FC <= 1)
Mm01G001781	0	0	0	0	0	0	0	0	0	0	0	0	0	NA	NA	NA	no diff (express=0)
Mm01G001782	219	161	166	82	70	46	191.089	132.244	106.616	124.105	77.6317	55.5342	114.537	0.74421	0.129165	0.307219	no_diff (p.adj > 0.05, -1 <= log2FC <= 1)
Mm01G001783	0	0	0	0	0	0	0	0	0	0	0	0	0	NA	NA	NA	no diff (express=0)
Mm01G001784	0	0	0	0	0	0	0	0	0	0	0	0	0	NA	NA	NA	no diff (express=0)
Mm01G001785	0	0	0	0	0	0	0	0	0	0	0	0	0	NA	NA	NA	no diff (express=0)
Mm01G001786	2	0	26	25	27	0	1.74511	0	16.6988	37.8368	29.9436	0	14.3707	-1.86738	0.353917	0.582026	no_diff (p.adj > 0.05, -1 <= log2FC <= 1)
Mm01G001787	69	51	179	110	21	15	60.2062	41.8911	114.965	166.482	23.2895	18.109	70.8238	0.0686941	0.942814	0.974149	no_diff (p.adj > 0.05, -1 <= log2FC <= 1)
Mm01G001788	2570	3790	4774	2578	3671	3413	2242.46	3113.08	3066.17	3901.73	4071.23	4120.39	3419.18	-0.521953	0.035271	0.123194	no_diff (p.adj > 0.05, -1 <= log2FC <= 1)
Mm01G001789	256	275	318	183	172	171	223.374	225.883	204.24	276.965	190.752	206.442	221.276	-0.0425526	0.88701	0.947964	no_diff (p.adj > 0.05, -1 <= log2FC <= 1)
Mm01G001790	4970	2132	3233	692	1850	2177	4336.59	1751.21	2076.44	1047.32	2051.69	2628.21	2315.25	0.511238	0.334525	0.562538	no_diff (p.adj > 0.05, -1 <= log2FC <= 1)
Mm01G001791	6	4	0	20	23	48	5.23533	3.28557	0	30.2694	25.5075	57.9487	20.3744	-3.7781	0.000687411	0.00578833	down (p.adj < 0.05, log2FC <= -1)
Mm01G001792	19	8	13	4	2	8	16.5785	6.57115	8.34942	6.05388	2.21805	9.65811	8.23819	0.815146	0.43692	0.657832	no_diff (p.adj > 0.05, -1 <= log2FC <= 1)
Mm01G001793	399	287	430	152	158	278	348.149	235.74	276.173	230.047	175.226	335.619	266.826	0.215047	0.582989	0.772611	no_diff (p.adj > 0.05, -1 <= log2FC <= 1)
Mm01G001794	0	0	0	0	0	0	0	0	0	0	0	0	0	NA	NA	NA	no diff (express=0)
Mm01G001795	0	3	5	3	0	2	0	2.46418	3.21132	4.54041	0	2.41453	2.10507	-0.26031	0.910028	NA	no_diff (p.adj > 0.05, -1 <= log2FC <= 1)
Mm01G001796	0	0	0	0	0	0	0	0	0	0	0	0	0	NA	NA	NA	no diff (express=0)
Mm01G001797	1433	865	1017	506	558	504	1250.37	710.505	653.182	765.816	618.835	608.461	767.862	0.39128	0.297942	0.525518	no_diff (p.adj > 0.05, -1 <= log2FC <= 1)
Mm01G001798	665	857	901	730	2196	1662	580.249	703.934	578.679	1104.83	2435.42	2006.47	1234.93	-1.57455	4.91889e-05	0.000673906	down (p.adj < 0.05, log2FC <= -1)
Mm01G001799	0	11	10	5	0	0	0	9.03533	6.42263	7.56735	0	0	3.83755	1.05705	0.698478	0.847118	no_diff (p.adj > 0.05, -1 <= log2FC <= 1)
Mm01G001800	0	0	0	0	0	0	0	0	0	0	0	0	0	NA	NA	NA	no diff (express=0)
Mm01G001801	481	412	424	117	223	230	419.699	338.414	272.32	177.076	247.312	277.671	288.749	0.551008	0.117029	0.28737	no_diff (p.adj > 0.05, -1 <= log2FC <= 1)
Mm01G001802	110	103	171	74	76	24	95.981	84.6035	109.827	111.997	84.2858	28.9743	85.9447	0.370455	0.531009	0.734116	no_diff (p.adj > 0.05, -1 <= log2FC <= 1)
Mm01G001803	1785	775	3224	217	289	85	1557.51	636.58	2070.66	328.423	320.508	102.617	836.049	2.50507	6.17069e-05	0.000815092	rich (p.adj < 0.05, log2FC >= 1)
Mm01G001804	0	0	0	0	0	0	0	0	0	0	0	0	0	NA	NA	NA	no diff (express=0)
Mm01G001805	1942	1505	1494	684	961	982	1694.5	1236.2	959.541	1035.21	1065.77	1185.53	1196.13	0.242899	0.44672	0.665462	no_diff (p.adj > 0.05, -1 <= log2FC <= 1)
Mm01G001806	211	256	310	190	502	476	184.109	210.277	199.102	287.559	556.73	574.658	335.406	-1.25873	0.00108932	0.00841653	down (p.adj < 0.05, log2FC <= -1)
Mm01G001807	8	3	27	38	34	41	6.98043	2.46418	17.3411	57.5119	37.7068	49.4978	28.5837	-2.4135	0.00354399	0.0214429	down (p.adj < 0.05, log2FC <= -1)
Mm01G001808	1484	1065	765	401	1152	1165	1294.87	874.784	491.331	606.902	1277.6	1406.46	991.991	-0.30718	0.553997	0.750932	no_diff (p.adj > 0.05, -1 <= log2FC <= 1)
Mm01G001809	0	0	0	0	0	0	0	0	0	0	0	0	0	NA	NA	NA	no diff (express=0)
Mm01G001810	599	1073	1601	627	1593	1313	522.66	881.355	1028.26	948.946	1766.67	1585.14	1122.17	-0.822306	0.0505635	0.159484	no_diff (p.adj > 0.05, -1 <= log2FC <= 1)
Mm01G001811	9	6	26	32	0	11	7.85299	4.92836	16.6988	48.431	0	13.2799	15.1985	-1.05425	0.482559	0.695977	no_diff (p.adj > 0.05, -1 <= log2FC <= 1)
Mm01G001812	59	403	746	397	166	76	51.4807	331.021	479.128	600.848	184.098	91.7521	289.721	-0.0235931	0.979545	0.990183	no_diff (p.adj > 0.05, -1 <= log2FC <= 1)
Mm01G001813	894	922	1384	441	790	467	780.063	757.325	888.892	667.44	876.129	563.792	755.607	0.203059	0.484655	0.697615	no_diff (p.adj > 0.05, -1 <= log2FC <= 1)
Mm01G001814	2	0	8	18	18	11	1.74511	0	5.13811	27.2425	19.9624	13.2799	11.228	-3.09286	0.0116193	0.0540353	no_diff (p.adj > 0.05, -1 <= log2FC <= 1)
Mm01G001815	3	0	0	12	10	0	2.61766	0	0	18.1616	11.0902	0	5.31159	-3.51193	0.160729	0.354615	no_diff (p.adj > 0.05, -1 <= log2FC <= 1)
Mm01G001816	1816	1941	2169	1132	1154	963	1584.56	1594.32	1393.07	1713.25	1279.81	1162.6	1454.6	0.13815	0.61114	0.791392	no_diff (p.adj > 0.05, -1 <= log2FC <= 1)
Mm01G001817	268	145	233	23	22	9	233.845	119.102	149.647	34.8098	24.3985	10.8654	95.4446	2.85277	1.09873e-06	2.56574e-05	rich (p.adj < 0.05, log2FC >= 1)
Mm01G001818	102	79	123	13	37	22	89.0005	64.8901	78.9984	19.6751	41.0339	26.5598	53.3596	1.40437	0.00475398	0.0271475	rich (p.adj < 0.05, log2FC >= 1)
Mm01G001819	415	307	938	5	0	0	362.11	252.168	602.443	7.56735	0	0	204.048	7.47829	1.06838e-13	1.179e-11	rich (p.adj < 0.05, log2FC >= 1)
Mm01G001820	80	43	99	32	36	66	69.8043	35.3199	63.5841	48.431	39.9249	79.6794	56.1239	0.00575605	0.991581	0.995998	no_diff (p.adj > 0.05, -1 <= log2FC <= 1)
Mm01G001821	0	3	3	5	0	0	0	2.46418	1.92679	7.56735	0	0	1.99305	-0.759527	0.803576	NA	no_diff (p.adj > 0.05, -1 <= log2FC <= 1)
Mm01G001822	4	0	5	3	10	0	3.49022	0	3.21132	4.54041	11.0902	0	3.72203	-1.22284	0.563104	0.7577	no_diff (p.adj > 0.05, -1 <= log2FC <= 1)
Mm01G001823	49	59	54	78	43	31	42.7552	48.4622	34.6822	118.051	47.688	37.4252	54.8439	-0.685108	0.26804	0.491377	no_diff (p.adj > 0.05, -1 <= log2FC <= 1)
Mm01G001824	226	264	258	150	117	133	197.197	216.848	165.704	227.021	129.756	160.566	182.849	0.167057	0.647294	0.815603	no_diff (p.adj > 0.05, -1 <= log2FC <= 1)
Mm01G001825	0	0	0	0	0	0	0	0	0	0	0	0	0	NA	NA	NA	no diff (express=0)
Mm01G001826	384	510	771	260	229	201	335.061	418.911	495.185	393.502	253.966	242.66	356.548	0.491403	0.169233	0.36716	no_diff (p.adj > 0.05, -1 <= log2FC <= 1)
Mm01G001827	698	1129	1268	601	1216	768	609.043	927.353	814.39	909.596	1348.57	927.179	922.689	-0.438568	0.183772	0.38683	no_diff (p.adj > 0.05, -1 <= log2FC <= 1)
Mm01G001828	0	0	0	0	0	0	0	0	0	0	0	0	0	NA	NA	NA	no diff (express=0)
Mm01G001829	327	299	440	68	92	101	285.325	245.597	282.596	102.916	102.03	121.934	190.066	1.31486	2.89645e-06	5.90441e-05	rich (p.adj < 0.05, log2FC >= 1)
Mm01G001830	241	393	287	237	352	384	210.286	322.808	184.33	358.692	390.376	463.589	321.68	-0.758456	0.0328851	0.117177	no_diff (p.adj > 0.05, -1 <= log2FC <= 1)
Mm01G001831	0	0	0	0	0	0	0	0	0	0	0	0	0	NA	NA	NA	no diff (express=0)
Mm01G001832	67	59	95	91	55	71	58.4611	48.4622	61.015	137.726	60.9963	85.7158	75.396	-0.754109	0.115056	0.284259	no_diff (p.adj > 0.05, -1 <= log2FC <= 1)
Mm01G001833	69	102	72	135	18	18	60.2062	83.7821	46.243	204.318	19.9624	21.7308	72.7072	-0.366915	0.706029	0.852262	no_diff (p.adj > 0.05, -1 <= log2FC <= 1)
Mm01G001834	0	0	0	0	0	0	0	0	0	0	0	0	0	NA	NA	NA	no diff (express=0)
Mm01G001835	581	528	550	239	281	258	506.954	433.696	353.245	361.719	311.636	311.474	379.787	0.393856	0.162652	0.35744	no_diff (p.adj > 0.05, -1 <= log2FC <= 1)
Mm01G001836	2	0	3	0	0	0	1.74511	0	1.92679	0	0	0	0.611983	2.39759	0.54515	NA	no diff (express=0)
Mm01G001837	660	680	654	149	146	241	575.886	558.547	420.04	225.507	161.917	290.951	372.141	1.19648	0.000849205	0.00686557	rich (p.adj < 0.05, log2FC >= 1)
Mm01G001838	167	160	458	283	425	130	145.717	131.423	294.157	428.312	471.335	156.944	271.315	-0.885784	0.127332	0.304326	no_diff (p.adj > 0.05, -1 <= log2FC <= 1)
Mm01G001839	134	202	66	19	90	75	116.922	165.921	42.3894	28.7559	99.8121	90.5448	90.7243	0.564675	0.435787	0.656845	no_diff (p.adj > 0.05, -1 <= log2FC <= 1)
Mm01G001840	99	132	145	37	250	247	86.3829	108.424	93.1282	55.9984	277.256	298.194	153.231	-1.13479	0.0852607	0.231294	no_diff (p.adj > 0.05, -1 <= log2FC <= 1)
Mm01G001841	6	0	7	11	0	10	5.23533	0	4.49584	16.6482	0	12.0726	6.40866	-1.55348	0.432289	0.654198	no_diff (p.adj > 0.05, -1 <= log2FC <= 1)
Mm01G001842	0	0	0	0	0	0	0	0	0	0	0	0	0	NA	NA	NA	no diff (express=0)
Mm01G001843	35	30	105	42	39	6	30.5394	24.6418	67.4376	63.5657	43.2519	7.24359	39.4467	0.111168	0.901267	0.95467	no_diff (p.adj > 0.05, -1 <= log2FC <= 1)
Mm01G001844	25	4	110	0	30	51	21.8139	3.28557	70.649	0	33.2707	61.5705	31.7649	0.0130564	0.993187	0.996812	no_diff (p.adj > 0.05, -1 <= log2FC <= 1)
Mm01G001845	905	66	323	12	90	134	789.662	54.212	207.451	18.1616	99.8121	161.773	221.845	1.90806	0.0630055	0.186704	no_diff (p.adj > 0.05, -1 <= log2FC <= 1)
Mm01G001846	0	0	0	0	0	0	0	0	0	0	0	0	0	NA	NA	NA	no diff (express=0)
Mm01G001847	0	0	0	0	0	0	0	0	0	0	0	0	0	NA	NA	NA	no diff (express=0)
Mm01G001848	0	0	0	0	0	0	0	0	0	0	0	0	0	NA	NA	NA	no diff (express=0)
Mm01G001849	94	52	107	74	64	154	82.0201	42.7125	68.7222	111.997	70.9775	185.919	93.7246	-0.931002	0.0884861	0.237361	no_diff (p.adj > 0.05, -1 <= log2FC <= 1)
Mm01G001850	1182	1863	2190	527	675	646	1031.36	1530.26	1406.56	797.599	748.591	779.893	1049.04	0.770874	0.00421284	0.0245889	no_diff (p.adj > 0.05, -1 <= log2FC <= 1)
Mm01G001851	17	19	107	3	8	3	14.8334	15.6065	68.7222	4.54041	8.87219	3.62179	19.3661	2.5347	0.0125514	0.0572115	no_diff (p.adj > 0.05, -1 <= log2FC <= 1)
Mm01G001852	0	2	10	29	81	5	0	1.64279	6.42263	43.8906	89.8309	6.03632	24.6372	-4.08092	0.00307768	0.0192339	down (p.adj < 0.05, log2FC <= -1)
Mm01G001853	133	139	225	82	118	238	116.05	114.174	144.509	124.105	130.865	287.329	152.838	-0.533573	0.265104	0.488139	no_diff (p.adj > 0.05, -1 <= log2FC <= 1)
Mm01G001854	2729	1896	5749	447	465	322	2381.2	1557.36	3692.37	676.521	515.696	388.739	1535.32	2.27175	2.88547e-07	7.91055e-06	rich (p.adj < 0.05, log2FC >= 1)
Mm01G001855	14	0	34	12	19	0	12.2158	0	21.837	18.1616	21.0714	0	12.2143	-0.200953	0.917264	0.961479	no_diff (p.adj > 0.05, -1 <= log2FC <= 1)
Mm01G001856	4	11	29	0	6	6	3.49022	9.03533	18.6256	0	6.65414	7.24359	7.50815	1.14752	0.411183	0.635227	no_diff (p.adj > 0.05, -1 <= log2FC <= 1)
Mm01G001857	357	425	682	154	220	91	311.502	349.092	438.024	233.074	243.985	109.861	280.923	0.905485	0.0359779	0.125045	no_diff (p.adj > 0.05, -1 <= log2FC <= 1)
Mm01G001858	99	38	171	68	245	238	86.3829	31.2129	109.827	102.916	271.711	287.329	148.23	-1.54117	0.0177981	0.0747044	no_diff (p.adj > 0.05, -1 <= log2FC <= 1)
Mm01G001859	192	262	325	95	84	79	167.53	215.205	208.736	143.78	93.158	95.3739	153.964	0.837126	0.0187265	0.0775693	no_diff (p.adj > 0.05, -1 <= log2FC <= 1)
Mm01G001860	0	0	0	0	0	0	0	0	0	0	0	0	0	NA	NA	NA	no diff (express=0)
Mm01G001861	0	0	0	0	0	0	0	0	0	0	0	0	0	NA	NA	NA	no diff (express=0)
Mm01G001862	1086	935	783	114	47	46	947.594	768.003	502.892	172.536	52.1241	55.5342	416.447	2.99095	4.0686e-07	1.07921e-05	rich (p.adj < 0.05, log2FC >= 1)
Mm01G001863	735	816	727	351	527	584	641.327	670.257	466.925	531.228	584.455	705.042	599.873	-0.0348243	0.906134	0.957165	no_diff (p.adj > 0.05, -1 <= log2FC <= 1)
Mm01G001864	133	87	199	126	28	21	116.05	71.4612	127.81	190.697	31.0527	25.3525	93.7373	0.357099	0.676899	0.832445	no_diff (p.adj > 0.05, -1 <= log2FC <= 1)
Mm01G001865	13	6	12	8	0	4	11.3432	4.92836	7.70716	12.1078	0	4.82906	6.81926	0.525261	0.7157	0.857744	no_diff (p.adj > 0.05, -1 <= log2FC <= 1)
Mm01G001866	1992	1928	2368	786	560	557	1738.13	1583.65	1520.88	1189.59	621.053	672.446	1220.96	0.964588	0.00768254	0.039483	no_diff (p.adj > 0.05, -1 <= log2FC <= 1)
Mm01G001867	35	23	55	45	108	38	30.5394	18.892	35.3245	68.1062	119.775	45.876	53.0854	-1.46319	0.0137358	0.0612211	no_diff (p.adj > 0.05, -1 <= log2FC <= 1)
Mm01G001868	15	10	14	24	54	34	13.0883	8.21393	8.99169	36.3233	59.8873	41.047	27.9252	-2.18998	0.000226889	0.00235292	down (p.adj < 0.05, log2FC <= -1)
Mm01G001869	183	303	349	189	277	204	159.677	248.882	224.15	286.046	307.2	246.282	245.373	-0.407378	0.206134	0.416347	no_diff (p.adj > 0.05, -1 <= log2FC <= 1)
Mm01G001870	0	0	0	0	0	0	0	0	0	0	0	0	0	NA	NA	NA	no diff (express=0)
Mm01G001871	1173	1445	1782	479	643	745	1023.51	1186.91	1144.51	724.952	713.102	899.412	948.733	0.521238	0.0283735	0.105379	no_diff (p.adj > 0.05, -1 <= log2FC <= 1)
Mm01G001872	350	442	376	245	229	241	305.394	363.056	241.491	370.8	253.966	290.951	304.276	-0.00825785	0.980089	0.990389	no_diff (p.adj > 0.05, -1 <= log2FC <= 1)
Mm01G001873	87	72	101	77	96	124	75.9122	59.1403	64.8686	116.537	106.466	149.701	95.4376	-0.899699	0.0119646	0.0551795	no_diff (p.adj > 0.05, -1 <= log2FC <= 1)
Mm01G001874	562	441	395	182	338	338	490.375	362.234	253.694	275.452	374.85	408.055	360.777	0.0621197	0.872453	0.941264	no_diff (p.adj > 0.05, -1 <= log2FC <= 1)
Mm01G001875	114	91	206	55	61	72	99.4712	74.7468	132.306	83.2409	67.6504	86.923	90.7231	0.369788	0.368062	0.596646	no_diff (p.adj > 0.05, -1 <= log2FC <= 1)
Mm01G001876	0	0	0	4	13	6	0	0	0	6.05388	14.4173	7.24359	4.61913	-6.0275	0.00290528	0.0184072	down (p.adj < 0.05, log2FC <= -1)
Mm01G001877	0	0	0	0	0	0	0	0	0	0	0	0	0	NA	NA	NA	no diff (express=0)
Mm01G001878	311	396	396	441	176	68	271.364	325.272	254.336	667.44	195.188	82.094	299.282	-0.149385	0.840509	0.92368	no_diff (p.adj > 0.05, -1 <= log2FC <= 1)
Mm01G001879	449	375	691	93	151	91	391.777	308.022	443.804	140.753	167.463	109.861	260.28	1.45151	1.77299e-05	0.000281205	rich (p.adj < 0.05, log2FC >= 1)
Mm01G001880	0	0	0	0	0	0	0	0	0	0	0	0	0	NA	NA	NA	no diff (express=0)
Mm01G001881	0	0	0	0	0	0	0	0	0	0	0	0	0	NA	NA	NA	no diff (express=0)
Mm01G001882	0	0	0	0	0	0	0	0	0	0	0	0	0	NA	NA	NA	no diff (express=0)
Mm01G001883	33	5	13	184	150	39	28.7943	4.10697	8.34942	278.478	166.354	47.0833	88.861	-3.58191	9.24561e-05	0.00114385	down (p.adj < 0.05, log2FC <= -1)
Mm01G001884	51	85	81	30	56	26	44.5003	69.8184	52.0233	45.4041	62.1053	31.3889	50.8734	0.257874	0.609369	0.789803	no_diff (p.adj > 0.05, -1 <= log2FC <= 1)
Mm01G001885	346	290	320	110	271	312	301.904	238.204	205.524	166.482	300.545	376.666	264.888	-0.18055	0.673906	0.831324	no_diff (p.adj > 0.05, -1 <= log2FC <= 1)
Mm01G001886	31	2	50	6	5	0	27.0492	1.64279	32.1132	9.08082	5.54512	0	12.5718	2.07082	0.172608	0.371584	no_diff (p.adj > 0.05, -1 <= log2FC <= 1)
Mm01G001887	155	234	456	123	121	71	135.246	192.206	292.872	186.157	134.192	85.7158	171.065	0.614803	0.216097	0.428395	no_diff (p.adj > 0.05, -1 <= log2FC <= 1)
Mm01G001888	350	308	429	273	142	80	305.394	252.989	275.531	413.177	157.481	96.5811	250.192	0.324095	0.586707	0.775479	no_diff (p.adj > 0.05, -1 <= log2FC <= 1)
Mm01G001889	16	29	45	117	8	2	13.9609	23.8204	28.9018	177.076	8.87219	2.41453	42.5076	-1.49308	NA	NA	no diff (express=0)
Mm01G001890	6259	8725	9311	15	14	4	5461.32	7166.66	5980.11	22.7021	15.5263	4.82906	3108.52	8.78018	3.75459e-70	4.90987e-66	rich (p.adj < 0.05, log2FC >= 1)
Mm01G001891	628	830	1614	379	1085	1002	547.964	681.756	1036.61	573.605	1203.29	1209.68	875.485	-0.398273	0.378874	0.607099	no_diff (p.adj > 0.05, -1 <= log2FC <= 1)
Mm01G001892	129	154	93	79	43	77	112.559	126.495	59.7305	119.564	47.688	92.9593	93.166	0.201628	0.716092	0.857854	no_diff (p.adj > 0.05, -1 <= log2FC <= 1)
Mm01G001893	928	1180	1463	917	704	393	809.73	969.244	939.631	1387.85	780.753	474.455	893.611	0.0413622	0.928747	0.966592	no_diff (p.adj > 0.05, -1 <= log2FC <= 1)
Mm01G001894	13	20	19	23	37	6	11.3432	16.4279	12.203	34.8098	41.0339	7.24359	20.5102	-1.05509	0.213673	0.425491	no_diff (p.adj > 0.05, -1 <= log2FC <= 1)
Mm01G001895	1592	1254	1135	1086	2783	2472	1389.11	1030.03	728.969	1643.63	3086.41	2984.36	1810.42	-1.29353	0.00190492	0.0131213	down (p.adj < 0.05, log2FC <= -1)
Mm01G001896	250	325	787	234	397	174	218.139	266.953	505.461	354.152	440.282	210.064	332.508	-0.0193589	0.969045	0.984976	no_diff (p.adj > 0.05, -1 <= log2FC <= 1)
Mm01G001897	41	97	28	48	74	19	35.7747	79.6751	17.9834	72.6466	82.0677	22.938	51.8476	-0.4147	0.603305	0.785857	no_diff (p.adj > 0.05, -1 <= log2FC <= 1)
Mm01G001898	22	37	416	9	305	373	19.1962	30.3916	267.182	13.6212	338.252	450.31	186.492	-1.3397	0.278166	0.503435	no_diff (p.adj > 0.05, -1 <= log2FC <= 1)
Mm01G001899	196	199	345	55	67	58	171.021	163.457	221.581	83.2409	74.3046	70.0213	130.604	1.29263	0.000100416	0.00122323	rich (p.adj < 0.05, log2FC >= 1)
Mm01G001900	343	239	489	18	37	8	299.286	196.313	314.067	27.2425	41.0339	9.65811	147.933	3.37419	9.93299e-09	3.97837e-07	rich (p.adj < 0.05, log2FC >= 1)
Mm01G001901	911	632	1353	71	178	94	794.897	519.121	868.982	107.456	197.406	113.483	433.558	2.38073	9.37514e-09	3.78391e-07	rich (p.adj < 0.05, log2FC >= 1)
Mm01G001902	0	9	21	4	5	7	0	7.39254	13.4875	6.05388	5.54512	8.45085	6.82165	0.0676815	0.963778	0.983315	no_diff (p.adj > 0.05, -1 <= log2FC <= 1)
Mm01G001903	609	697	766	325	424	412	531.386	572.511	491.974	491.878	470.226	497.393	509.228	0.128697	0.550856	0.748537	no_diff (p.adj > 0.05, -1 <= log2FC <= 1)
Mm01G001904	696	733	735	340	417	374	607.298	602.081	472.064	514.58	462.463	451.517	518.334	0.235114	0.349522	0.577327	no_diff (p.adj > 0.05, -1 <= log2FC <= 1)
Mm01G001905	0	0	2	0	0	0	0	0	1.28453	0	0	0	0.214088	0.917341	0.821271	NA	no_diff (p.adj > 0.05, -1 <= log2FC <= 1)
Mm01G001906	33	49	59	20	46	26	28.7943	40.2483	37.8935	30.2694	51.0151	31.3889	36.6016	-0.0799366	0.87691	0.942977	no_diff (p.adj > 0.05, -1 <= log2FC <= 1)
Mm01G001907	800	1012	955	630	609	633	698.043	831.25	613.361	953.486	675.395	764.198	755.956	-0.158987	0.57928	0.769764	no_diff (p.adj > 0.05, -1 <= log2FC <= 1)
Mm01G001908	4	2	9	195	593	407	3.49022	1.64279	5.78037	295.127	657.651	491.357	242.508	-7.01152	1.00711e-28	6.75386e-26	down (p.adj < 0.05, log2FC <= -1)
Mm01G001909	0	0	0	0	0	0	0	0	0	0	0	0	0	NA	NA	NA	no diff (express=0)
Mm01G001910	1547	1599	1965	1047	2512	1861	1349.84	1313.41	1262.05	1584.6	2785.87	2246.72	1757.08	-0.753813	0.0148265	0.0648667	no_diff (p.adj > 0.05, -1 <= log2FC <= 1)
Mm01G001911	328	423	633	406	1084	1140	286.198	347.449	406.553	614.469	1202.18	1376.28	705.522	-1.6181	8.94653e-05	0.00111105	down (p.adj < 0.05, log2FC <= -1)
Mm01G001912	0	0	3	0	0	0	0	0	1.92679	0	0	0	0.321132	1.49114	0.71006	NA	no diff (express=0)
Mm01G001913	2290	6358	1377	2174	926	544	1998.15	5222.42	884.397	3290.28	1026.96	656.752	2179.83	0.704573	0.382745	0.610386	no_diff (p.adj > 0.05, -1 <= log2FC <= 1)
Mm01G001914	22	21	10	10	14	19	19.1962	17.2493	6.42263	15.1347	15.5263	22.938	16.0779	-0.333649	0.667145	0.827007	no_diff (p.adj > 0.05, -1 <= log2FC <= 1)
Mm01G001915	302	249	156	145	278	294	263.511	204.527	100.193	219.453	308.309	354.936	241.821	-0.637833	0.185494	0.388984	no_diff (p.adj > 0.05, -1 <= log2FC <= 1)
Mm01G001916	2161	2532	3242	918	1192	1117	1885.59	2079.77	2082.22	1389.37	1321.96	1348.51	1684.57	0.575167	0.00217611	0.0146515	no_diff (p.adj > 0.05, -1 <= log2FC <= 1)
Mm01G001917	155	176	266	86	14	9	135.246	144.565	170.842	130.158	15.5263	10.8654	101.201	1.53313	0.101855	0.261783	no_diff (p.adj > 0.05, -1 <= log2FC <= 1)
Mm01G001918	0	0	0	0	0	0	0	0	0	0	0	0	0	NA	NA	NA	no diff (express=0)
Mm01G001919	0	0	0	2	0	0	0	0	0	3.02694	0	0	0.50449	-2.79799	0.486379	NA	no diff (express=0)
Mm01G001920	0	0	15	6	0	0	0	0	9.63395	9.08082	0	0	3.11913	0.102191	0.978469	NA	no_diff (p.adj > 0.05, -1 <= log2FC <= 1)
Mm01G001921	62	91	154	77	149	125	54.0984	74.7468	98.9086	116.537	165.245	150.908	110.074	-0.924283	0.0243747	0.0940952	no_diff (p.adj > 0.05, -1 <= log2FC <= 1)
Mm01G001922	267	314	522	223	433	340	232.972	257.917	335.261	337.504	480.207	410.47	342.389	-0.572053	0.0701053	0.20157	no_diff (p.adj > 0.05, -1 <= log2FC <= 1)
Mm01G001923	162	272	405	171	323	190	141.354	223.419	260.117	258.803	358.215	229.38	245.215	-0.437267	0.271222	0.495083	no_diff (p.adj > 0.05, -1 <= log2FC <= 1)
Mm01G001924	538	738	1234	783	1058	867	469.434	606.188	792.553	1185.05	1173.35	1046.7	878.878	-0.865302	0.00482698	0.0274744	no_diff (p.adj > 0.05, -1 <= log2FC <= 1)
Mm01G001925	71	121	112	103	189	170	61.9513	99.3886	71.9335	155.887	209.605	205.235	134	-1.29268	0.000475417	0.00431299	down (p.adj < 0.05, log2FC <= -1)
Mm01G001926	0	0	0	0	0	0	0	0	0	0	0	0	0	NA	NA	NA	no diff (express=0)
Mm01G001927	133	212	217	123	111	62	116.05	174.135	139.371	186.157	123.102	74.8504	135.611	0.164675	0.728746	0.865206	no_diff (p.adj > 0.05, -1 <= log2FC <= 1)
Mm01G001928	117	145	159	103	155	170	102.089	119.102	102.12	155.887	171.899	205.235	142.722	-0.72309	0.0177364	0.0744587	no_diff (p.adj > 0.05, -1 <= log2FC <= 1)
Mm01G001929	91	104	170	27	44	22	79.4024	85.4249	109.185	40.8637	48.797	26.5598	65.0388	1.23821	0.00641028	0.0343614	rich (p.adj < 0.05, log2FC >= 1)
Mm01G001930	0	0	0	0	0	0	0	0	0	0	0	0	0	NA	NA	NA	no diff (express=0)
Mm01G001931	41	26	17	20	21	7	35.7747	21.3562	10.9185	30.2694	23.2895	8.45085	21.6765	0.134499	0.871658	0.940807	no_diff (p.adj > 0.05, -1 <= log2FC <= 1)
Mm01G001932	31	29	35	18	12	15	27.0492	23.8204	22.4792	27.2425	13.3083	18.109	22.0014	0.333942	0.583432	0.772941	no_diff (p.adj > 0.05, -1 <= log2FC <= 1)
Mm01G001933	142	110	261	112	168	199	123.903	90.3533	167.631	169.509	186.316	240.246	162.993	-0.641204	0.10521	0.267777	no_diff (p.adj > 0.05, -1 <= log2FC <= 1)
Mm01G001934	180	153	315	53	281	195	157.06	125.673	202.313	80.2139	311.636	235.417	185.385	-0.372626	0.51921	0.725411	no_diff (p.adj > 0.05, -1 <= log2FC <= 1)
Mm01G001935	623	870	1537	757	1308	1328	543.601	714.612	987.159	1145.7	1450.6	1603.25	1074.15	-0.902988	0.00956072	0.0466156	no_diff (p.adj > 0.05, -1 <= log2FC <= 1)
Mm01G001936	13	31	107	20	36	23	11.3432	25.4632	68.7222	30.2694	39.9249	27.7671	33.915	0.112047	0.88977	0.949104	no_diff (p.adj > 0.05, -1 <= log2FC <= 1)
Mm01G001937	0	0	0	0	3	7	0	0	0	0	3.32707	8.45085	1.96299	-4.79285	0.186557	NA	no diff (express=0)
Mm01G001938	0	1	0	0	0	0	0	0.821393	0	0	0	0	0.136899	0.249044	0.951333	NA	no_diff (p.adj > 0.05, -1 <= log2FC <= 1)
Mm01G001939	221	188	305	96	253	168	192.834	154.422	195.89	145.293	280.583	202.82	195.307	-0.213446	0.577976	0.768655	no_diff (p.adj > 0.05, -1 <= log2FC <= 1)
Mm01G001940	131	95	165	92	160	146	114.305	78.0324	105.973	139.239	177.444	176.261	131.876	-0.726222	0.0343874	0.121053	no_diff (p.adj > 0.05, -1 <= log2FC <= 1)
Mm01G001941	132	172	280	171	311	169	115.177	141.28	179.834	258.803	344.906	204.028	207.338	-0.887597	0.0195217	0.0800011	no_diff (p.adj > 0.05, -1 <= log2FC <= 1)
Mm01G001942	0	0	0	0	3	0	0	0	0	0	3.32707	0	0.554512	-2.98421	0.456329	NA	no diff (express=0)
Mm01G001943	169	212	314	210	296	315	147.462	174.135	201.671	317.829	328.271	380.288	258.276	-0.970685	0.00063099	0.00541256	no_diff (p.adj > 0.05, -1 <= log2FC <= 1)
Mm01G001944	2384	421	1872	157	556	525	2080.17	345.807	1202.32	237.615	616.617	633.814	852.723	1.28533	0.0676152	0.196512	no_diff (p.adj > 0.05, -1 <= log2FC <= 1)
Mm01G001945	297	301	335	265	305	285	259.149	247.239	215.158	401.07	338.252	344.07	300.823	-0.586244	0.0210998	0.084535	no_diff (p.adj > 0.05, -1 <= log2FC <= 1)
Mm01G001946	146	252	226	19	25	31	127.393	206.991	145.152	28.7559	27.7256	37.4252	95.5737	2.35093	4.3224e-08	1.49581e-06	rich (p.adj < 0.05, log2FC >= 1)
Mm01G001947	66	97	267	264	802	829	57.5886	79.6751	171.484	399.556	889.437	1000.82	433.094	-2.88846	6.46428e-07	1.61323e-05	down (p.adj < 0.05, log2FC <= -1)
Mm01G001948	358	245	1567	50	213	266	312.374	201.241	1006.43	75.6735	236.222	321.132	358.845	1.26311	0.100599	0.259756	no_diff (p.adj > 0.05, -1 <= log2FC <= 1)
Mm01G001949	376	550	566	179	298	284	328.08	451.766	363.521	270.911	330.489	342.863	347.938	0.274807	0.338073	0.566387	no_diff (p.adj > 0.05, -1 <= log2FC <= 1)
Mm01G001950	139	221	287	59	215	136	121.285	181.528	184.33	89.2947	238.44	164.188	163.178	-0.0165211	0.973105	0.987107	no_diff (p.adj > 0.05, -1 <= log2FC <= 1)
Mm01G001951	309	495	614	196	270	299	269.619	406.59	394.35	296.64	299.436	360.972	337.935	0.161987	0.60342	0.785857	no_diff (p.adj > 0.05, -1 <= log2FC <= 1)
Mm01G001952	955	1154	2169	971	2266	1646	833.289	947.888	1393.07	1469.58	2513.05	1987.16	1524.01	-0.911211	0.0132054	0.0594756	no_diff (p.adj > 0.05, -1 <= log2FC <= 1)
Mm01G001953	12880	12868	19607	4747	30938	15686	11238.5	10569.7	12592.9	7184.44	34311	18937.1	15805.6	-0.812895	0.153555	0.344079	no_diff (p.adj > 0.05, -1 <= log2FC <= 1)
Mm01G001954	247	332	374	117	86	108	215.521	272.703	240.206	177.076	95.376	130.385	188.544	0.859079	0.0205955	0.0832155	no_diff (p.adj > 0.05, -1 <= log2FC <= 1)
Mm01G001955	163	159	364	81	80	136	142.226	130.602	233.784	122.591	88.7219	164.188	147.019	0.43419	0.334006	0.562136	no_diff (p.adj > 0.05, -1 <= log2FC <= 1)
Mm01G001956	1940	1887	1606	664	777	827	1692.76	1549.97	1031.47	1004.94	861.711	998.408	1189.88	0.57698	0.0596013	0.179578	no_diff (p.adj > 0.05, -1 <= log2FC <= 1)
Mm01G001957	0	0	0	0	0	0	0	0	0	0	0	0	0	NA	NA	NA	no diff (express=0)
Mm01G001958	357	666	856	254	300	340	311.502	547.048	549.777	384.421	332.707	410.47	422.654	0.321533	0.364292	0.592345	no_diff (p.adj > 0.05, -1 <= log2FC <= 1)
Mm01G001959	1495	457	192	22	25	159	1304.47	375.377	123.315	33.2963	27.7256	191.955	342.689	2.8323	0.00472296	0.0269999	rich (p.adj < 0.05, log2FC >= 1)
Mm01G001960	695	294	67	0	11	58	606.425	241.49	43.0316	0	12.1993	70.0213	162.195	3.4343	0.0117441	0.0544633	no_diff (p.adj > 0.05, -1 <= log2FC <= 1)
Mm01G001961	1150	1789	240	24	84	834	1003.44	1469.47	154.143	36.3233	93.158	1006.86	627.232	1.2087	0.298386	0.526087	no_diff (p.adj > 0.05, -1 <= log2FC <= 1)
Mm01G001962	101	93	15	8	0	42	88.128	76.3896	9.63395	12.1078	0	50.7051	39.4941	1.46977	0.307493	0.535752	no_diff (p.adj > 0.05, -1 <= log2FC <= 1)
Mm01G001963	28	47	7	0	6	30	24.4315	38.6055	4.49584	0	6.65414	36.2179	18.4008	0.648361	0.663119	0.824925	no_diff (p.adj > 0.05, -1 <= log2FC <= 1)
Mm01G001964	0	1	4	0	0	0	0	0.821393	2.56905	0	0	0	0.565074	2.29056	0.563661	NA	no diff (express=0)
Mm01G001965	8	4	0	0	0	14	6.98043	3.28557	0	0	0	16.9017	4.52795	-0.728332	0.793286	0.899897	no_diff (p.adj > 0.05, -1 <= log2FC <= 1)
Mm01G001966	1057	940	697	16	17	138	922.29	772.11	447.658	24.2155	18.8534	166.602	391.955	3.35103	7.56783e-05	0.000968342	rich (p.adj < 0.05, log2FC >= 1)
Mm01G001967	0	0	0	0	0	0	0	0	0	0	0	0	0	NA	NA	NA	no diff (express=0)
Mm01G001968	13	8	11	2	2	12	11.3432	6.57115	7.0649	3.02694	2.21805	14.4872	7.4519	0.33058	0.775061	0.890579	no_diff (p.adj > 0.05, -1 <= log2FC <= 1)
Mm01G001969	40	48	20	6	17	24	34.9022	39.4269	12.8453	9.08082	18.8534	28.9743	24.0138	0.602807	0.44884	0.666965	no_diff (p.adj > 0.05, -1 <= log2FC <= 1)
Mm01G001970	20	15	18	1	2	8	17.4511	12.3209	11.5607	1.51347	2.21805	9.65811	9.12039	1.60835	0.136999	0.318675	no_diff (p.adj > 0.05, -1 <= log2FC <= 1)
Mm01G001971	112	57	43	10	4	103	97.7261	46.8194	27.6173	15.1347	4.43609	124.348	52.6803	0.25616	0.824725	0.915335	no_diff (p.adj > 0.05, -1 <= log2FC <= 1)
Mm01G001972	201	37	18	2	27	102	175.383	30.3916	11.5607	3.02694	29.9436	123.141	62.2412	0.474309	0.716682	0.858136	no_diff (p.adj > 0.05, -1 <= log2FC <= 1)
Mm01G001973	352	524	162	0	44	413	307.139	430.41	104.047	0	48.797	498.6	231.499	0.620033	0.676526	0.832253	no_diff (p.adj > 0.05, -1 <= log2FC <= 1)
Mm01G001974	4	0	0	0	0	4	3.49022	0	0	0	0	4.82906	1.38655	-0.485052	0.899968	NA	no_diff (p.adj > 0.05, -1 <= log2FC <= 1)
Mm01G001975	142	213	176	13	21	207	123.903	174.957	113.038	19.6751	23.2895	249.904	117.461	0.490709	0.616767	0.794667	no_diff (p.adj > 0.05, -1 <= log2FC <= 1)
Mm01G001976	241	198	352	7	18	81	210.286	162.636	226.077	10.5943	19.9624	97.7884	121.224	2.21868	0.00683935	0.0360638	rich (p.adj < 0.05, log2FC >= 1)
Mm01G001977	30	12	37	26	6	12	26.1766	9.85672	23.7637	39.3502	6.65414	14.4872	20.0481	-0.00211546	0.998165	0.999235	no_diff (p.adj > 0.05, -1 <= log2FC <= 1)
Mm01G001978	0	4	0	4	20	39	0	3.28557	0	6.05388	22.1805	47.0833	13.1005	-4.5488	0.00546216	0.0303306	down (p.adj < 0.05, log2FC <= -1)
Mm01G001979	0	0	0	0	0	0	0	0	0	0	0	0	0	NA	NA	NA	no diff (express=0)
Mm01G001980	42	47	87	120	28	23	36.6473	38.6055	55.8769	181.616	31.0527	27.7671	61.9276	-0.868312	0.309525	0.537894	no_diff (p.adj > 0.05, -1 <= log2FC <= 1)
Mm01G001981	0	0	0	0	0	0	0	0	0	0	0	0	0	NA	NA	NA	no diff (express=0)
Mm01G001982	141	200	169	72	48	49	123.03	164.279	108.543	108.97	53.2331	59.1559	102.868	0.844803	0.0706423	0.202638	no_diff (p.adj > 0.05, -1 <= log2FC <= 1)
Mm01G001983	53	37	16	421	20	44	46.2454	30.3916	10.2762	637.171	22.1805	53.1196	133.231	-3.03638	0.00896817	0.0444398	down (p.adj < 0.05, log2FC <= -1)
Mm01G001984	1485	1682	1936	889	991	1222	1295.74	1381.58	1243.42	1345.47	1099.04	1475.28	1306.76	0.000498627	0.998328	0.999322	no_diff (p.adj > 0.05, -1 <= log2FC <= 1)
Mm01G001985	1	5	0	0	0	0	0.872554	4.10697	0	0	0	0	0.82992	2.82971	0.473564	NA	no diff (express=0)
Mm01G001986	35	139	121	81	9	15	30.5394	114.174	77.7139	122.591	9.98121	18.109	62.1847	0.568745	0.577798	0.768646	no_diff (p.adj > 0.05, -1 <= log2FC <= 1)
Mm01G001987	1678	4251	1705	533	457	583	1464.15	3491.74	1095.06	806.68	506.824	703.835	1344.71	1.58493	0.00262153	0.0169335	rich (p.adj < 0.05, log2FC >= 1)
Mm01G001988	0	0	0	0	0	0	0	0	0	0	0	0	0	NA	NA	NA	no diff (express=0)
Mm01G001989	0	0	0	0	0	0	0	0	0	0	0	0	0	NA	NA	NA	no diff (express=0)
Mm01G001990	64	84	43	20	19	19	55.8435	68.997	27.6173	30.2694	21.0714	22.938	37.7894	1.03969	0.0833971	0.227822	no_diff (p.adj > 0.05, -1 <= log2FC <= 1)
Mm01G001991	0	0	0	0	0	0	0	0	0	0	0	0	0	NA	NA	NA	no diff (express=0)
Mm01G001992	0	0	0	0	0	0	0	0	0	0	0	0	0	NA	NA	NA	no diff (express=0)
Mm01G001993	507	721	1225	374	987	710	442.385	592.225	786.773	566.038	1094.61	857.158	723.197	-0.467308	0.247951	0.467381	no_diff (p.adj > 0.05, -1 <= log2FC <= 1)
Mm01G001994	817	1513	1977	362	414	393	712.877	1242.77	1269.75	547.876	459.136	474.455	784.478	1.12317	0.00112465	0.00862546	rich (p.adj < 0.05, log2FC >= 1)
Mm01G001995	211	226	194	98	50	69	184.109	185.635	124.599	148.32	55.4512	83.3012	130.236	0.788912	0.117581	0.288266	no_diff (p.adj > 0.05, -1 <= log2FC <= 1)
Mm01G001996	1452	2151	871	3510	1909	1504	1266.95	1766.82	559.411	5312.28	2117.13	1815.73	2139.72	-1.36343	0.0251751	0.0966433	no_diff (p.adj > 0.05, -1 <= log2FC <= 1)
Mm01G001997	244	227	366	130	177	180	212.903	186.456	235.068	196.751	196.297	217.308	207.464	0.0564058	0.834208	0.920236	no_diff (p.adj > 0.05, -1 <= log2FC <= 1)
Mm01G001998	0	0	0	0	0	0	0	0	0	0	0	0	0	NA	NA	NA	no diff (express=0)
[truncated: 44,353 more rows]
