# Supplementary material for: Metabolomics and Transcriptomics Reveal the Response Mechanisms of Mikania micrantha to Puccinia spegazzinii Infection
Source: Microorganisms. 2023 Mar 7;11(3):678. doi: 10.3390/microorganisms11030678 (PMC10057677; doi:10.3390/microorganisms11030678)
Supplement: Supplementary file 1 [file microorganisms-11-00678-s001.zip › Supplementary Table 4.xlsx]

## Sheet: kegg enrich-upgene
Supplementary Table S4 The KEGG pathway enrichment of significantly up-regulated genes.
KEGG_A_class	KEGG_B_class	Pathway	out (749)	All (16000)	Pvalue	Qvalue	Pathway ID	Genes	K_IDs
Genetic Information Processing	Folding, sorting and degradation	Protein processing in endoplasmic reticulum	70	730	7.94e-09	9.6e-07	ko04141	Mm01G000674;Mm01G003162;Mm01G003280;Mm01G003281;Mm02G004297;Mm02G006276;Mm03G008210;Mm04G008748;Mm04G008750;Mm04G008751;Mm04G009163;Mm04G010299;Mm04G010566;Mm05G012393;Mm05G013249;Mm05G013446;Mm06G014103;Mm06G015712;Mm06G015812;Mm06G015932;Mm06G016171;Mm06G016172;Mm06G016310;Mm07G017692;Mm07G017702;Mm07G017703;Mm07G017749;Mm07G017756;Mm07G018265;Mm07G018669;Mm07G019262;Mm08G020086;Mm08G020276;Mm0…	K03283+K09580+K13993+K13993+K03283+K06689+K08054+K13993+K13993+K13993+K09490+K08057+K13993+K03094+K03868+K04374+K13993+K03283+K09517+K14007+K13993+K13993+K09562+K03283+K03283+K03283+K03283+K03283+K03283+K03347+K13993+K09487+K03094+K03283+K13993+K03283+K03283+K01228+K13989+K01230+K01230+K07151+K03283+K13993+K03347+K10950+K09487+K09584+K09584+K03283+K11718+K11718+K09523+K10956+K04374+K08054+K14007+…
Genetic Information Processing	Translation	Ribosome biogenesis in eukaryotes	24	184	5.35e-06	0.000324	ko03008	Mm01G001879;Mm01G002629;Mm02G005022;Mm02G005892;Mm03G006735;Mm07G018531;Mm08G021082;Mm08G021088;Mm09G022324;Mm10G024239;Mm11G025897;Mm11G026687;Mm11G027595;Mm14G032473;Mm14G033329;Mm19G040462;Mm19G041092;Mm19G041137;Mm19G041397;Mm19G041401;MmUnG042541;MmUnG043328;MmUnG045042;MmUnG045396	K14544+K11131+K14558+K14569+K14556+K14525+K03539+K03539+K11128+K14566+K12845+K07562+K14554+K11131+K14521+K14544+K14564+K14552+K14572+K14572+K11131+K14550+K14556+K14550
Cellular Processes	Transport and catabolism	Endocytosis	45	515	4.26e-05	0.00172	ko04144	Mm01G000674;Mm02G004297;Mm02G004533;Mm04G010240;Mm06G013826;Mm06G015322;Mm06G015712;Mm07G017692;Mm07G017702;Mm07G017703;Mm07G017749;Mm07G017756;Mm07G018177;Mm07G018265;Mm07G018924;Mm08G019805;Mm08G020308;Mm08G020734;Mm09G022270;Mm09G023339;Mm09G023340;Mm10G023637;Mm10G023886;Mm10G024674;Mm10G024923;Mm11G026206;Mm11G026364;Mm11G027454;Mm12G027798;Mm12G029046;Mm13G029873;Mm16G036158;Mm16G036469;Mm1…	K03283+K03283+K12182+K12471+K09526+K12182+K03283+K03283+K03283+K03283+K03283+K03283+K12471+K03283+K00889+K19476+K10396+K04646+K03283+K03283+K03283+K12489+K19476+K19366+K18468+K03283+K01115+K12196+K18442+K03283+K12471+K00889+K12471+K10396+K01115+K07897+K12471+K12200+K18443+K00889+K07937+K03283+K03283+K07901+K07904
Organismal Systems	Environmental adaptation	Plant-pathogen interaction	65	891	0.000240418	0.00727	ko04626	Mm01G000443;Mm01G000542;Mm01G002635;Mm01G003438;Mm02G004662;Mm02G004703;Mm02G005243;Mm02G006288;Mm03G007463;Mm04G008790;Mm04G009134;Mm04G009135;Mm04G009622;Mm04G009657;Mm04G010097;Mm04G010231;Mm04G010253;Mm05G012353;Mm05G012690;Mm06G015621;Mm06G015887;Mm06G016121;Mm07G019118;Mm07G019246;Mm08G019882;Mm08G019896;Mm08G019913;Mm08G020086;Mm08G020159;Mm08G021363;Mm08G021655;Mm10G024005;Mm11G025655;Mm1…	K05391+K13459+K02183+K16225+K13413+K18875+K13420+K13412+K13436+K05391+K13425+K13425+K13448+K05391+K13416+K13459+K13459+K13459+K13425+K13429+K02358+K13424+K13425+K13412+K13466+K13466+K13466+K09487+K13448+K13425+K18834+K02183+K13416+K13459+K16224+K13412+K13425+K13457+K09487+K05391+K13424+K13447+K18875+K13424+K13434+K16225+K13424+K13412+K02183+K16225+K16225+K13428+K13412+K13466+K13424+K13457+K13448+…
Genetic Information Processing	Folding, sorting and degradation	RNA degradation	31	354	0.00062123	0.015	ko03018	Mm01G001283;Mm01G001817;Mm01G001829;Mm02G003744;Mm02G004082;Mm02G004133;Mm03G006612;Mm03G006651;Mm03G006829;Mm04G009452;Mm04G009542;Mm05G013484;Mm06G014911;Mm07G018229;Mm07G019116;Mm08G019579;Mm09G022076;Mm11G026586;Mm11G026852;Mm11G027001;Mm12G028842;Mm12G028851;Mm13G029855;Mm14G031899;Mm14G031961;Mm15G033601;Mm15G033613;Mm16G036580;Mm17G037115;Mm17G037248;MmUnG044819	K04077+K00962+K01148+K08311+K04077+K04077+K12581+K12611+K12589+K00850+K12616+K12581+K04077+K01689+K14442+K00970+K12581+K14442+K12581+K12598+K04077+K04077+K04077+K04077+K13126+K01148+K01148+K04077+K12581+K12608+K14442
Metabolism	Carbohydrate metabolism	Starch and sucrose metabolism	43	568	0.00132097	0.0266	ko00500	Mm01G001385;Mm01G002431;Mm01G002632;Mm01G002675;Mm01G002848;Mm01G002903;Mm02G003763;Mm02G004396;Mm02G004928;Mm03G007441;Mm03G007712;Mm04G008964;Mm04G009590;Mm04G009726;Mm04G009736;Mm04G009839;Mm05G012855;Mm05G012947;Mm05G013149;Mm05G013579;Mm05G013638;Mm06G014316;Mm06G014334;Mm06G014976;Mm07G016361;Mm07G016752;Mm07G018226;Mm07G018700;Mm07G018845;Mm07G018976;Mm09G022739;Mm10G024760;Mm11G025987;Mm1…	K19891+K00847+K01176+K01176+K01176+K05349+K01176+K01176+K00844+K05350+K01176+K01176+K00700+K16055+K16055+K00975+K01177+K01187+K16055+K01176+K00847+K01176+K01176+K05349+K16055+K16055+K00688+K00695+K16055+K01176+K00688+K05349+K00844+K01087+K00700+K00700+K01176+K19891+K00847+K00847+K00705+K01176+K05350
Metabolism	Glycan biosynthesis and metabolism	N-Glycan biosynthesis	12	95	0.00156528	0.0271	ko00510	Mm01G002028;Mm08G019472;Mm10G023677;Mm10G024791;Mm11G025602;Mm11G025662;Mm11G025997;Mm17G037103;Mm18G038880;MmUnG042136;MmUnG044216;MmUnG045406	K00726+K00737+K00737+K01228+K01230+K01230+K07151+K00737+K12669+K12666+K12669+K00736
Metabolism	Nucleotide metabolism	Pyrimidine metabolism	15	137	0.00189568	0.0287	ko00240	Mm01G002717;Mm01G002777;Mm01G003522;Mm02G003796;Mm02G005760;Mm04G009546;Mm07G016579;Mm07G016630;Mm07G017249;Mm07G018457;Mm08G020743;Mm09G023196;Mm11G027349;Mm15G033964;MmUnG045936	K00943+K00876+K13800+K00207+K01955+K00876+K01465+K00857+K00876+K01465+K01510+K10808+K01510+K00254+K10808
Organismal Systems	Environmental adaptation	Circadian rhythm - plant	18	186	0.00284611	0.0383	ko04712	Mm01G001862;Mm01G001890;Mm02G004568;Mm03G007145;Mm04G009764;Mm05G012834;Mm07G016671;Mm10G024008;Mm11G026542;Mm11G026622;Mm11G027583;Mm11G027600;Mm13G030508;Mm14G032658;Mm14G032679;Mm16G035189;MmUnG042784;MmUnG044145	K12135+K12116+K12133+K12125+K12135+K16240+K12135+K12127+K12135+K12130+K12124+K12124+K12127+K16223+K16223+K12124+K12129+K12135
Metabolism	Carbohydrate metabolism	Inositol phosphate metabolism	17	175	0.00353344	0.0428	ko00562	Mm02G006073;Mm03G006959;Mm04G008884;Mm05G012167;Mm05G012861;Mm06G013873;Mm07G018924;Mm08G020698;Mm11G026237;Mm11G026999;Mm14G033348;Mm16G035587;Mm16G036158;Mm16G036164;Mm18G039412;Mm18G039413;MmUnG042068	K00921+K10572+K18081+K20279+K20279+K01803+K00889+K05857+K00999+K20279+K20279+K10572+K00889+K18081+K00913+K00913+K00889
Metabolism	Glycan biosynthesis and metabolism	Other types of O-glycan biosynthesis	5	25	0.00539609	0.0594	ko00514	Mm02G005231;Mm02G005271;Mm13G030904;Mm16G035414;MmUnG044037	K00728+K00728+K18134+K00728+K18134
Metabolism	Amino acid metabolism	Alanine, aspartate and glutamate metabolism	9	73	0.00684162	0.069	ko00250	Mm01G001696;Mm02G005760;Mm08G019835;Mm14G032137;Mm16G035357;Mm16G036079;MmUnG043371;MmUnG043671;MmUnG043699	K01580+K01955+K16871+K01580+K01940+K00811+K01953+K01580+K01915
Metabolism	Carbohydrate metabolism	Butanoate metabolism	7	49	0.00741049	0.069	ko00650	Mm01G001696;Mm08G019835;Mm09G023547;Mm11G025307;Mm11G025326;Mm14G032137;MmUnG043671	K01580+K16871+K01652+K01652+K01652+K01580+K01580
Metabolism	Glycan biosynthesis and metabolism	Various types of N-glycan biosynthesis	8	62	0.00803208	0.0694	ko00513	Mm01G002028;Mm11G025602;Mm11G025662;Mm11G025997;Mm18G038880;MmUnG042136;MmUnG044216;MmUnG045406	K00726+K01230+K01230+K07151+K12669+K12666+K12669+K00736
Genetic Information Processing	Folding, sorting and degradation	Ubiquitin mediated proteolysis	24	307	0.00990205	0.0799	ko04120	Mm01G002373;Mm01G003383;Mm01G003646;Mm01G003660;Mm02G006276;Mm03G006563;Mm03G008464;Mm04G009116;Mm04G009692;Mm05G012393;Mm05G013249;Mm06G014487;Mm06G014643;Mm07G018669;Mm08G020276;Mm11G027233;Mm11G027385;Mm12G028492;Mm12G028623;Mm15G033576;Mm15G033589;Mm16G035451;MmUnG041796;MmUnG042220	K10688+K03348+K03364+K03364+K06689+K06688+K10592+K03362+K10581+K03094+K03868+K04506+K10599+K03347+K03094+K03363+K03364+K03347+K10592+K10592+K10592+K03355+K03363+K10592
Metabolism	Carbohydrate metabolism	Fructose and mannose metabolism	15	173	0.0159745	0.121	ko00051	Mm01G002431;Mm02G004928;Mm04G009452;Mm05G013505;Mm05G013638;Mm06G013873;Mm07G019154;Mm08G019967;Mm08G020616;Mm08G020619;Mm09G022192;Mm11G025987;Mm15G033600;Mm15G033611;Mm15G034473	K00847+K00844+K00850+K01623+K00847+K01803+K17497+K00011+K01623+K01623+K01623+K00844+K00847+K00847+K01623
Genetic Information Processing	Folding, sorting and degradation	Protein export	9	85	0.0177355	0.126	ko03060	Mm04G009163;Mm05G012818;Mm08G020617;Mm13G031361;Mm13G031495;Mm15G034305;Mm18G039092;Mm19G040535;MmUnG044879	K09490+K03217+K03217+K03076+K03070+K10956+K10956+K03070+K13431
Metabolism	Metabolism of other amino acids	Taurine and hypotaurine metabolism	3	13	0.0205536	0.138	ko00430	Mm01G001696;Mm14G032137;MmUnG043671	K01580+K01580+K01580
Metabolism	Global and overview maps	Fatty acid metabolism	16	198	0.0238935	0.143	ko01212	Mm01G001153;Mm01G002566;Mm02G005747;Mm03G007501;Mm08G019786;Mm08G020055;Mm08G020057;Mm08G020058;Mm08G021483;Mm09G022550;Mm12G028060;Mm12G028218;Mm15G035014;Mm16G036405;Mm17G037492;MmUnG043507	K01074+K01074+K02160+K00648+K01074+K10256+K10256+K10256+K02160+K01074+K10527+K01074+K01897+K00208+K07512+K01074
Metabolism	Glycan biosynthesis and metabolism	Mannose type O-glycan biosyntheis	3	14	0.0252667	0.143	ko00515	Mm02G005231;Mm02G005271;Mm16G035414	K00728+K00728+K00728
Metabolism	Global and overview maps	Biosynthesis of amino acids	35	530	0.0256212	0.143	ko01230	Mm01G000322;Mm01G002457;Mm01G002572;Mm01G002584;Mm02G006100;Mm02G006308;Mm04G009049;Mm04G009452;Mm04G009816;Mm05G013257;Mm05G013505;Mm06G013873;Mm06G014755;Mm07G017644;Mm07G018229;Mm08G019498;Mm08G020616;Mm08G020619;Mm09G022165;Mm09G022192;Mm09G023547;Mm11G025307;Mm11G025326;Mm11G026753;Mm11G026991;Mm14G032141;Mm14G033462;Mm15G034473;Mm16G035357;Mm16G036079;MmUnG043371;MmUnG043699;MmUnG045653;MmU…	K01693+K14682+K00826+K06001+K01834+K01807+K00616+K00850+K01681+K00616+K01623+K01803+K01649+K00620+K01689+K00134+K01623+K01623+K01626+K01623+K01652+K01652+K01652+K00145+K01807+K00031+K12657+K01623+K01940+K00811+K01953+K01915+K15633+K15633+K15633
Metabolism	Metabolism of cofactors and vitamins	Pantothenate and CoA biosynthesis	6	49	0.0260297	0.143	ko00770	Mm01G002572;Mm02G003796;Mm09G023547;Mm11G025307;Mm11G025326;Mm19G041028	K00826+K00207+K01652+K01652+K01652+K09680
Cellular Processes	Transport and catabolism	Phagosome	14	173	0.0327743	0.166	ko04145	Mm01G001328;Mm02G004533;Mm02G006073;Mm03G006624;Mm03G008210;Mm04G010299;Mm06G015322;Mm15G034305;Mm16G035397;Mm16G036449;Mm17G036736;Mm17G037519;Mm18G039092;Mm19G041159	K08488+K12182+K00921+K07374+K08054+K08057+K12182+K10956+K08054+K07374+K07897+K07375+K10956+K02148
Metabolism	Lipid metabolism	Fatty acid elongation	7	66	0.0341287	0.166	ko00062	Mm01G001153;Mm01G002566;Mm08G019786;Mm09G022550;Mm12G028218;Mm17G037492;MmUnG043507	K01074+K01074+K01074+K01074+K01074+K07512+K01074
Metabolism	Amino acid metabolism	Valine, leucine and isoleucine biosynthesis	5	39	0.0342451	0.166	ko00290	Mm01G002572;Mm06G014755;Mm09G023547;Mm11G025307;Mm11G025326	K00826+K01649+K01652+K01652+K01652
Metabolism	Amino acid metabolism	Arginine biosynthesis	6	53	0.0365848	0.17	ko00220	Mm01G002457;Mm07G017644;Mm11G026753;Mm16G035357;Mm16G036079;MmUnG043699	K14682+K00620+K00145+K01940+K00811+K01915
Metabolism	Global and overview maps	2-Oxocarboxylic acid metabolism	11	131	0.0435264	0.195	ko01210	Mm01G002457;Mm01G002572;Mm04G009816;Mm06G014755;Mm07G017644;Mm09G023547;Mm11G025307;Mm11G025326;Mm11G026753;Mm14G032141;Mm16G036079	K14682+K00826+K01681+K01649+K00620+K01652+K01652+K01652+K00145+K00031+K00811
Metabolism	Metabolism of terpenoids and polyketides	Zeatin biosynthesis	7	75	0.061059	0.264	ko00908	Mm02G005314;Mm05G012965;Mm06G014806;Mm13G030917;Mm15G034416;Mm18G039484;MmUnG042043	K13496+K13496+K00791+K13496+K13496+K13495+K13496
Metabolism	Lipid metabolism	Glycerophospholipid metabolism	20	298	0.0678016	0.283	ko00564	Mm02G004281;Mm03G007660;Mm05G011543;Mm07G017201;Mm07G018468;Mm11G026237;Mm11G026364;Mm11G026873;Mm13G031429;Mm14G031738;Mm15G033931;Mm15G033933;Mm16G035472;Mm16G035533;Mm16G036093;Mm17G036675;Mm17G037373;MmUnG042329;MmUnG043129;MmUnG045127	K00967+K00901+K14674+K01126+K01047+K00999+K01115+K13508+K13508+K05929+K13506+K13506+K01126+K00901+K06130+K01115+K13506+K00901+K06130+K00901
Metabolism	Carbohydrate metabolism	C5-Branched dibasic acid metabolism	3	24	0.0998095	0.403	ko00660	Mm09G023547;Mm11G025307;Mm11G025326	K01652+K01652+K01652
Metabolism	Amino acid metabolism	Tryptophan metabolism	9	121	0.114152	0.446	ko00380	Mm02G004240;Mm08G020143;Mm12G028391;Mm12G028418;Mm17G037840;Mm17G037844;Mm17G037848;Mm17G037849;MmUnG043711	K11816+K03781+K07130+K07130+K16903+K16903+K16903+K16903+K07130
Metabolism	Carbohydrate metabolism	Citrate cycle (TCA cycle)	8	106	0.123668	0.468	ko00020	Mm03G006888;Mm04G009816;Mm07G018703;Mm12G029280;Mm14G032141;Mm18G039163;Mm19G040452;MmUnG045097	K01648+K01681+K01679+K00164+K00031+K00025+K00234+K00164
Genetic Information Processing	Replication and repair	Non-homologous end-joining	2	14	0.137447	0.497	ko03450	Mm07G018813;Mm16G036539	K04799+K10866
Metabolism	Carbohydrate metabolism	Glycolysis / Gluconeogenesis	18	291	0.139628	0.497	ko00010	Mm02G004928;Mm02G006100;Mm03G008596;Mm04G009452;Mm05G013505;Mm06G013873;Mm07G018229;Mm08G019498;Mm08G020616;Mm08G020619;Mm09G022192;Mm11G025987;Mm15G033656;Mm15G034473;Mm18G039062;MmUnG045653;MmUnG045654;MmUnG046160	K00844+K01834+K18857+K00850+K01623+K01803+K01689+K00134+K01623+K01623+K01623+K00844+K00121+K01623+K01568+K15633+K15633+K15633
Metabolism	Metabolism of cofactors and vitamins	Thiamine metabolism	4	45	0.158199	0.533	ko00730	Mm06G013914;Mm07G017006;Mm14G032401;Mm16G036243	K03147+K03146+K03153+K00939
Metabolism	Global and overview maps	Biosynthesis of secondary metabolites	164	3266	0.162177	0.533	ko01110	Mm01G000322;Mm01G000972;Mm01G001696;Mm01G002301;Mm01G002431;Mm01G002457;Mm01G002572;Mm01G002584;Mm01G002632;Mm01G002675;Mm01G002848;Mm01G002903;Mm01G002957;Mm02G003763;Mm02G004396;Mm02G004473;Mm02G004488;Mm02G004489;Mm02G004928;Mm02G005314;Mm02G005713;Mm02G005747;Mm02G006100;Mm02G006284;Mm02G006308;Mm03G006506;Mm03G006888;Mm03G007220;Mm03G007441;Mm03G007660;Mm03G007712;Mm03G008435;Mm03G008591;Mm0…	K01693+K07748+K01580+K01885+K00847+K14682+K00826+K06001+K01176+K01176+K01176+K05349+K00953+K01176+K01176+K01923+K13030+K13030+K00844+K13496+K00699+K02160+K01834+K00276+K01807+K06892+K01648+K14975+K05350+K00901+K01176+K11808+K01952+K18857+K01176+K00616+K00850+K00700+K16055+K16055+K01681+K00975+K02492+K02492+K14674+K06892+K06892+K09755+K01177+K01187+K13496+K16055+K00616+K01623+K01490+K01176+K00847+…
Metabolism	Energy metabolism	Nitrogen metabolism	5	63	0.171673	0.533	ko00910	Mm01G002466;Mm01G002467;Mm07G018299;Mm11G026955;MmUnG043699	K01455+K01455+K01674+K10534+K01915
Metabolism	Metabolism of other amino acids	Cyanoamino acid metabolism	10	152	0.175648	0.533	ko00460	Mm01G002466;Mm01G002467;Mm01G002903;Mm02G004488;Mm02G004489;Mm03G007441;Mm06G014976;Mm10G024760;Mm19G040563;MmUnG043791	K01455+K01455+K05349+K13030+K13030+K05350+K05349+K05349+K13030+K05350
Genetic Information Processing	Translation	RNA transport	28	496	0.176225	0.533	ko03013	Mm01G002866;Mm03G006555;Mm03G006808;Mm03G006956;Mm03G007148;Mm04G009308;Mm04G009365;Mm04G010398;Mm06G015799;Mm07G016591;Mm07G017368;Mm07G018531;Mm08G019755;Mm08G021065;Mm08G021082;Mm08G021088;Mm09G023019;Mm09G023543;Mm11G026687;Mm13G030621;Mm13G030733;Mm13G030734;Mm13G030735;Mm13G030736;Mm14G031961;Mm18G039253;MmUnG041817;MmUnG045652	K03231+K03231+K14304+K03239+K14291+K02516+K03260+K14303+K03239+K00784+K14298+K14525+K09291+K14293+K03539+K03539+K14310+K03231+K07562+K03243+K14299+K14299+K14299+K14299+K13126+K03260+K14310+K03239
Environmental Information Processing	Signal transduction	MAPK signaling pathway - plant	28	496	0.176225	0.533	ko04016	Mm01G002635;Mm02G004662;Mm02G005243;Mm04G009134;Mm04G009135;Mm04G010097;Mm05G012690;Mm06G016121;Mm07G018154;Mm07G018237;Mm07G019118;Mm08G020143;Mm08G021363;Mm10G024005;Mm11G025655;Mm11G026414;Mm12G028066;Mm12G028226;Mm12G029243;Mm13G030014;Mm13G031123;Mm13G031543;Mm14G032498;Mm16G036048;Mm17G036706;Mm19G040117;Mm19G040131;MmUnG044104	K02183+K13413+K13420+K13425+K13425+K13416+K13425+K13424+K13422+K14497+K13425+K03781+K13425+K02183+K13416+K16224+K14498+K13425+K13424+K13447+K13424+K13424+K02183+K13424+K13422+K14498+K14498+K13425
Metabolism	Lipid metabolism	Glycerolipid metabolism	16	276	0.223325	0.655	ko00561	Mm03G007660;Mm03G008617;Mm04G009673;Mm04G010918;Mm04G010922;Mm05G011543;Mm08G019967;Mm11G026873;Mm13G031429;Mm14G033263;Mm15G033931;Mm15G033933;Mm16G035533;Mm17G037373;MmUnG042329;MmUnG045127	K00901+K01054+K01054+K03715+K03715+K14674+K00011+K13508+K13508+K07407+K13506+K13506+K00901+K13506+K00901+K00901
Metabolism	Nucleotide metabolism	Purine metabolism	13	219	0.227433	0.655	ko00230	Mm02G004473;Mm03G008435;Mm03G008591;Mm05G013564;Mm08G020743;Mm09G023196;Mm11G027349;Mm13G030794;Mm14G033093;Mm16G036243;Mm17G037853;MmUnG045267;MmUnG045936	K01923+K11808+K01952+K01490+K01510+K10808+K01510+K01923+K00106+K00939+K01945+K01951+K10808
Metabolism	Metabolism of cofactors and vitamins	Folate biosynthesis	5	76	0.283193	0.784	ko00790	Mm05G012642;Mm08G019967;Mm11G026796;Mm19G041115;MmUnG044342	K15631+K00011+K15631+K15631+K20457
Metabolism	Biosynthesis of other secondary metabolites	Caffeine metabolism	1	7	0.285141	0.784	ko00232	Mm14G033093	K00106
Metabolism	Metabolism of terpenoids and polyketides	Brassinosteroid biosynthesis	2	24	0.310619	0.835	ko00905	Mm05G013330;Mm08G019850	K15639+K15639
Metabolism	Metabolism of cofactors and vitamins	Vitamin B6 metabolism	2	25	0.328093	0.863	ko00750	Mm09G023620;MmUnG045712	K06215+K06215
Metabolism	Global and overview maps	Carbon metabolism	33	652	0.345711	0.873	ko01200	Mm01G002466;Mm01G002467;Mm02G004928;Mm02G005747;Mm02G006100;Mm02G006308;Mm04G009049;Mm04G009452;Mm04G009816;Mm05G013257;Mm05G013505;Mm06G013873;Mm07G018229;Mm07G018703;Mm08G019498;Mm08G020143;Mm08G020616;Mm08G020619;Mm08G021483;Mm09G022192;Mm11G025987;Mm11G026991;Mm12G029280;Mm14G032141;Mm15G033656;Mm15G034473;Mm18G039163;Mm19G040452;Mm19G041332;MmUnG045097;MmUnG045653;MmUnG045654;MmUnG046160	K01455+K01455+K00844+K02160+K01834+K01807+K00616+K00850+K01681+K00616+K01623+K01803+K01689+K01679+K00134+K03781+K01623+K01623+K02160+K01623+K00844+K01807+K00164+K00031+K00121+K01623+K00025+K00234+K00029+K00164+K15633+K15633+K15633
Metabolism	Carbohydrate metabolism	Glyoxylate and dicarboxylate metabolism	9	162	0.34779	0.873	ko00630	Mm01G002466;Mm01G002467;Mm04G009816;Mm08G020143;Mm12G028391;Mm12G028418;Mm18G039163;MmUnG043699;MmUnG043711	K01455+K01455+K01681+K03781+K07130+K07130+K00025+K01915+K07130
Metabolism	Amino acid metabolism	Tyrosine metabolism	7	123	0.353727	0.873	ko00350	Mm01G002711;Mm02G006284;Mm03G008596;Mm15G033656;Mm16G036079;MmUnG045871;MmUnG045872	K01555+K00276+K18857+K00121+K00811+K01800+K01800
Metabolism	Metabolism of cofactors and vitamins	Riboflavin metabolism	2	28	0.379673	0.918	ko00740	Mm01G002957;Mm07G019111	K00953+K00861
Metabolism	Biosynthesis of other secondary metabolites	Phenylpropanoid biosynthesis	20	394	0.386939	0.918	ko00940	Mm01G002903;Mm03G006506;Mm03G007441;Mm05G011581;Mm05G011596;Mm05G012074;Mm06G014976;Mm06G015765;Mm06G015766;Mm06G015767;Mm08G020762;Mm10G024760;Mm11G025817;Mm11G026248;Mm11G026259;Mm14G032058;Mm14G032330;Mm16G036340;Mm16G036441;MmUnG043791	K05349+K06892+K05350+K06892+K06892+K09755+K05349+K00430+K00430+K00430+K00430+K05349+K13065+K00430+K00430+K00430+K12356+K01904+K06892+K05350
Metabolism	Glycan biosynthesis and metabolism	Glycosaminoglycan degradation	5	90	0.413786	0.935	ko00531	Mm01G002930;Mm04G010414;Mm18G039398;MmUnG043746;MmUnG046010	K12309+K10532+K01205+K10532+K12309
Metabolism	Biosynthesis of other secondary metabolites	Tropane, piperidine and pyridine alkaloid biosynthesis	3	50	0.416963	0.935	ko00960	Mm02G006284;Mm11G027379;Mm16G036079	K00276+K08081+K00811
Metabolism	Carbohydrate metabolism	Pentose phosphate pathway	10	193	0.417253	0.935	ko00030	Mm02G006308;Mm04G009049;Mm04G009452;Mm05G013257;Mm05G013505;Mm08G020616;Mm08G020619;Mm09G022192;Mm11G026991;Mm15G034473	K01807+K00616+K00850+K00616+K01623+K01623+K01623+K01623+K01807+K01623
Metabolism	Metabolism of cofactors and vitamins	Nicotinate and nicotinamide metabolism	3	51	0.429567	0.942	ko00760	Mm05G012271;Mm07G017897;Mm12G028741	K00763+K03426+K00858
Metabolism	Lipid metabolism	Ether lipid metabolism	6	113	0.436099	0.942	ko00565	Mm05G011543;Mm06G014096;Mm06G016173;Mm07G018468;Mm11G026364;Mm17G036675	K14674+K04628+K04628+K01047+K01115+K01115
Genetic Information Processing	Translation	Aminoacyl-tRNA biosynthesis	10	199	0.455314	0.963	ko00970	Mm01G001318;Mm01G002301;Mm03G006649;Mm05G013100;Mm06G015046;Mm08G019937;Mm08G021199;Mm11G025626;Mm18G038643;MmUnG044952	K01876+K01885+K01870+K02435+K01876+K01876+K00604+K01870+K01880+K01887
Metabolism	Energy metabolism	Carbon fixation in photosynthetic organisms	11	221	0.461393	0.963	ko00710	Mm02G006308;Mm05G013505;Mm06G013873;Mm08G019498;Mm08G020616;Mm08G020619;Mm09G022192;Mm11G026991;Mm15G034473;Mm18G039163;Mm19G041332	K01807+K01623+K01803+K00134+K01623+K01623+K01623+K01807+K01623+K00025+K00029
Metabolism	Lipid metabolism	Fatty acid biosynthesis	6	118	0.477621	0.98	ko00061	Mm02G005747;Mm03G007501;Mm08G021483;Mm15G035014;Mm16G036405;Mm17G037492	K02160+K00648+K02160+K01897+K00208+K07512
Metabolism	Metabolism of cofactors and vitamins	Biotin metabolism	2	35	0.492479	0.993	ko00780	Mm11G027230;Mm16G036405	K00652+K00208
Metabolism	Metabolism of other amino acids	Phosphonate and phosphinate metabolism	1	15	0.512993	1	ko00440	Mm02G004281	K00967
Metabolism	Lipid metabolism	Biosynthesis of unsaturated fatty acids	3	61	0.548872	1	ko01040	Mm08G020055;Mm08G020057;Mm08G020058	K10256+K10256+K10256
Metabolism	Metabolism of terpenoids and polyketides	Carotenoid biosynthesis	4	84	0.558105	1	ko00906	Mm03G006613;Mm05G012959;MmUnG041590;MmUnG044686	K14593+K09843+K09841+K09841
Metabolism	Amino acid metabolism	Cysteine and methionine metabolism	10	217	0.566099	1	ko00270	Mm01G002572;Mm06G014695;Mm07G019393;Mm07G019394;Mm16G036079;Mm17G037835;Mm18G039163;MmUnG044121;MmUnG044122;MmUnG046040	K00826+K01251+K05933+K05933+K00811+K00558+K00025+K05933+K05933+K00547
Metabolism	Biosynthesis of other secondary metabolites	Isoflavonoid biosynthesis	1	23	0.668286	1	ko00943	Mm19G040482	K13266
Metabolism	Energy metabolism	Sulfur metabolism	3	73	0.670707	1	ko00920	Mm10G023919;Mm15G035013;Mm19G040158	K17285+K17285+K17285
Metabolism	Lipid metabolism	Sphingolipid metabolism	8	192	0.68171	1	ko00600	Mm01G001547;Mm01G002930;Mm06G014096;Mm06G016173;Mm07G017418;Mm09G022792;Mm14G033263;MmUnG046010	K01190+K12309+K04628+K04628+K17108+K04713+K07407+K12309
Metabolism	Lipid metabolism	alpha-Linolenic acid metabolism	5	123	0.688312	1	ko00592	Mm03G008596;Mm05G011543;Mm07G018468;Mm12G028060;Mm17G038082	K18857+K14674+K01047+K10527+K10528
Genetic Information Processing	Transcription	Spliceosome	27	623	0.689806	1	ko03040	Mm01G000674;Mm02G003859;Mm02G004297;Mm05G012661;Mm06G014643;Mm06G015712;Mm07G017401;Mm07G017692;Mm07G017702;Mm07G017703;Mm07G017749;Mm07G017756;Mm07G018265;Mm09G022270;Mm09G023339;Mm09G023340;Mm10G024111;Mm11G025897;Mm11G026206;Mm11G026931;Mm12G029046;Mm16G036544;Mm19G040911;Mm19G040912;MmUnG041917;MmUnG042310;MmUnG043360	K03283+K12741+K03283+K12854+K10599+K03283+K12872+K03283+K03283+K03283+K03283+K03283+K03283+K03283+K03283+K03283+K12874+K12845+K03283+K12828+K03283+K12741+K12741+K12741+K12854+K03283+K03283
Metabolism	Lipid metabolism	Fatty acid degradation	4	100	0.694569	1	ko00071	Mm03G008596;Mm12G028060;Mm15G033656;Mm15G035014	K18857+K10527+K00121+K01897
Metabolism	Glycan biosynthesis and metabolism	Glycosphingolipid biosynthesis - globo and isoglobo series	1	25	0.698659	1	ko00603	Mm14G033263	K07407
Genetic Information Processing	Replication and repair	Homologous recombination	10	243	0.706394	1	ko03440	Mm01G002927;Mm03G007951;Mm07G018874;Mm07G018936;Mm08G021433;Mm11G025214;Mm16G036539;Mm17G036899;Mm17G037418;Mm17G037442	K04728+K10683+K10683+K10683+K03111+K10683+K10866+K10683+K10683+K10683
Genetic Information Processing	Transcription	Basal transcription factors	3	79	0.721846	1	ko03022	Mm17G037550;MmUnG041650;MmUnG044757	K06634+K06634+K03125
Metabolism	Global and overview maps	Metabolic pathways	322	7035	0.722121	1	ko01100	Mm01G000153;Mm01G000322;Mm01G000832;Mm01G000913;Mm01G000972;Mm01G001153;Mm01G001385;Mm01G001431;Mm01G001547;Mm01G001696;Mm01G002028;Mm01G002102;Mm01G002176;Mm01G002301;Mm01G002431;Mm01G002457;Mm01G002466;Mm01G002467;Mm01G002566;Mm01G002572;Mm01G002584;Mm01G002619;Mm01G002625;Mm01G002627;Mm01G002632;Mm01G002675;Mm01G002711;Mm01G002717;Mm01G002777;Mm01G002848;Mm01G002903;Mm01G002930;Mm01G002957;Mm0…	K01259+K01693+K01183+K01183+K07748+K01074+K19891+K00972+K01190+K01580+K00726+K01583+K00799+K01885+K00847+K14682+K01455+K01455+K01074+K00826+K06001+K13648+K13648+K00012+K01176+K01176+K01555+K00943+K00876+K01176+K05349+K12309+K00953+K13800+K18819+K01176+K00207+K11816+K00967+K01176+K01923+K13030+K13030+K15428+K00844+K00728+K00728+K13379+K00699+K02160+K01955+K00921+K01834+K00276+K01807+K01648+K10572+…
Metabolism	Metabolism of cofactors and vitamins	Ubiquinone and other terpenoid-quinone biosynthesis	4	111	0.769217	1	ko00130	Mm06G016143;Mm11G025776;Mm16G036340;MmUnG041659	K03809+K09833+K01904+K06127
Metabolism	Amino acid metabolism	Glycine, serine and threonine metabolism	6	161	0.770498	1	ko00260	Mm01G002584;Mm02G006100;Mm02G006284;MmUnG045653;MmUnG045654;MmUnG046160	K06001+K01834+K00276+K15633+K15633+K15633
Metabolism	Metabolism of other amino acids	Glutathione metabolism	9	235	0.776438	1	ko00480	Mm01G002176;Mm02G004731;Mm05G013550;Mm07G018670;Mm09G023196;Mm14G032141;MmUnG042945;MmUnG044674;MmUnG045936	K00799+K15428+K00799+K00799+K10808+K00031+K00799+K00799+K10808
Metabolism	Lipid metabolism	Linoleic acid metabolism	2	60	0.778269	1	ko00591	Mm05G011543;Mm07G018468	K14674+K01047
Metabolism	Metabolism of other amino acids	beta-Alanine metabolism	5	139	0.784992	1	ko00410	Mm01G001696;Mm02G003796;Mm02G006284;Mm14G032137;MmUnG043671	K01580+K00207+K00276+K01580+K01580
Genetic Information Processing	Replication and repair	Base excision repair	5	139	0.784992	1	ko03410	Mm07G017240;Mm07G018813;Mm13G029946;Mm14G033327;Mm19G039901	K10773+K04799+K10563+K10773+K10801
Environmental Information Processing	Membrane transport	ABC transporters	15	383	0.796661	1	ko02010	Mm04G009530;Mm04G009568;Mm06G014915;Mm06G015051;Mm06G015501;Mm06G015841;Mm07G017309;Mm08G021731;Mm08G021758;Mm13G030910;Mm14G031878;Mm18G039625;Mm19G040551;Mm19G041282;MmUnG045250	K05665+K05665+K05681+K05681+K05666+K05665+K05681+K08711+K08711+K05643+K05665+K05681+K05681+K08712+K05665
Environmental Information Processing	Signal transduction	Plant hormone signal transduction	32	778	0.802364	1	ko04075	Mm01G001674;Mm02G004662;Mm02G004733;Mm02G005196;Mm02G005199;Mm03G006945;Mm03G008251;Mm04G010097;Mm06G014089;Mm06G014476;Mm06G015343;Mm06G015497;Mm07G016962;Mm07G018154;Mm07G018237;Mm08G020935;Mm09G022819;Mm09G023354;Mm10G024378;Mm11G025655;Mm12G028066;Mm13G030998;Mm13G031020;Mm13G031365;Mm14G033447;Mm16G035420;Mm17G036706;Mm19G040117;Mm19G040131;MmUnG042501;MmUnG044386;MmUnG045151	K14486+K13413+K14431+K13415+K13415+K14488+K14494+K13416+K14491+K14492+K14491+K14492+K14494+K13422+K14497+K14494+K14489+K14491+K14500+K13416+K14498+K14500+K14491+K14495+K14494+K14494+K13422+K14498+K14498+K14486+K14491+K14486
Metabolism	Biosynthesis of other secondary metabolites	Glucosinolate biosynthesis	1	34	0.804424	1	ko00966	Mm01G002572	K00826
Metabolism	Lipid metabolism	Steroid biosynthesis	2	64	0.807951	1	ko00100	Mm01G000972;Mm05G011543	K07748+K14674
Metabolism	Amino acid metabolism	Arginine and proline metabolism	4	118	0.80877	1	ko00330	Mm01G000153;Mm01G002102;Mm14G033462;Mm16G036079	K01259+K01583+K12657+K00811
Metabolism	Biosynthesis of other secondary metabolites	Isoquinoline alkaloid biosynthesis	4	118	0.80877	1	ko00950	Mm02G006284;Mm03G007220;Mm10G024785;Mm16G036079	K00276+K14975+K14976+K00811
Metabolism	Amino acid metabolism	Histidine metabolism	1	35	0.813599	1	ko00340	Mm01G000322	K01693
Genetic Information Processing	Folding, sorting and degradation	SNARE interactions in vesicular transport	2	65	0.814796	1	ko04130	Mm01G001316;Mm01G001328	K08486+K08488
Environmental Information Processing	Signal transduction	Phosphatidylinositol signaling system	24	605	0.82741	1	ko04070	Mm01G002635;Mm02G006073;Mm03G006959;Mm03G007660;Mm04G008884;Mm05G012167;Mm05G012861;Mm07G018924;Mm08G020698;Mm10G024005;Mm10G025102;Mm11G026237;Mm11G026999;Mm14G032498;Mm14G033348;Mm16G035533;Mm16G035587;Mm16G036158;Mm16G036164;Mm18G039412;Mm18G039413;MmUnG042068;MmUnG042329;MmUnG045127	K02183+K00921+K10572+K00901+K18081+K20279+K20279+K00889+K05857+K02183+K13024+K00999+K20279+K02183+K20279+K00901+K10572+K00889+K18081+K00913+K00913+K00889+K00901+K00901
Metabolism	Lipid metabolism	Arachidonic acid metabolism	2	68	0.834041	1	ko00590	Mm05G011543;Mm07G018468	K14674+K01047
Metabolism	Metabolism of cofactors and vitamins	One carbon pool by folate	1	39	0.846197	1	ko00670	Mm08G021199	K00604
Metabolism	Amino acid metabolism	Phenylalanine, tyrosine and tryptophan biosynthesis	3	101	0.85773	1	ko00400	Mm01G002584;Mm09G022165;Mm16G036079	K06001+K01626+K00811
Metabolism	Metabolism of cofactors and vitamins	Porphyrin and chlorophyll metabolism	5	156	0.860412	1	ko00860	Mm01G002301;Mm02G005713;Mm04G009926;Mm04G009947;Mm11G025968	K01885+K00699+K02492+K02492+K13606
Metabolism	Glycan biosynthesis and metabolism	Glycosphingolipid biosynthesis - ganglio series	2	74	0.867199	1	ko00604	Mm01G002930;MmUnG046010	K12309+K12309
Metabolism	Amino acid metabolism	Phenylalanine metabolism	2	77	0.881394	1	ko00360	Mm02G006284;Mm16G036079	K00276+K00811
Metabolism	Carbohydrate metabolism	Pyruvate metabolism	6	194	0.896254	1	ko00620	Mm02G005747;Mm06G014755;Mm07G018703;Mm08G021483;Mm18G039163;Mm19G041332	K02160+K01649+K01679+K02160+K00025+K00029
Metabolism	Metabolism of terpenoids and polyketides	Monoterpenoid biosynthesis	1	63	0.951513	1	ko00902	Mm09G022252	K20144
Cellular Processes	Transport and catabolism	Autophagy - other eukaryotes	1	63	0.951513	1	ko04136	Mm02G004697	K07204
Metabolism	Carbohydrate metabolism	Amino sugar and nucleotide sugar metabolism	26	744	0.956187	1	ko00520	Mm01G000832;Mm01G000913;Mm01G001431;Mm01G002431;Mm01G002619;Mm01G002625;Mm01G002627;Mm02G004928;Mm02G005321;Mm04G009839;Mm05G013153;Mm05G013638;Mm07G018949;Mm07G019154;Mm08G019441;Mm08G021464;Mm09G023013;Mm11G025987;Mm11G026870;Mm12G028742;Mm14G032476;Mm15G033600;Mm15G033611;Mm15G034042;Mm15G034679;MmUnG041823	K01183+K01183+K00972+K00847+K13648+K13648+K00012+K00844+K13379+K00975+K00770+K00847+K12448+K17497+K16190+K13379+K00326+K00844+K13648+K12450+K13648+K00847+K00847+K01183+K12449+K00326
Metabolism	Metabolism of terpenoids and polyketides	Diterpenoid biosynthesis	2	109	0.96626	1	ko00904	Mm08G020727;Mm08G021695	K04125+K04124
Metabolism	Biosynthesis of other secondary metabolites	Stilbenoid, diarylheptanoid and gingerol biosynthesis	1	75	0.972794	1	ko00945	Mm11G025817	K13065
Genetic Information Processing	Replication and repair	Nucleotide excision repair	5	215	0.975199	1	ko03420	Mm05G012846;Mm05G013249;Mm07G016941;Mm17G037550;MmUnG041650	K10848+K03868+K10840+K06634+K06634
Metabolism	Carbohydrate metabolism	Propanoate metabolism	2	124	0.981738	1	ko00640	Mm02G005747;Mm08G021483	K02160+K02160
Metabolism	Glycan biosynthesis and metabolism	Glycosylphosphatidylinositol(GPI)-anchor biosynthesis	2	128	0.984527	1	ko00563	Mm16G036109;Mm19G039943	K05287+K05285
Genetic Information Processing	Translation	mRNA surveillance pathway	10	382	0.986267	1	ko03015	Mm01G003179;Mm04G009444;Mm06G016265;Mm08G020941;Mm08G021604;Mm11G026397;Mm13G030078;Mm14G031961;Mm17G038062;Mm18G039652	K14411+K11584+K14409+K14401+K14407+K14399+K14407+K13126+K11584+K03456
Metabolism	Energy metabolism	Oxidative phosphorylation	9	363	0.989497	1	ko00190	Mm01G000758;Mm05G012458;Mm05G012489;Mm10G024422;Mm11G025774;Mm12G028676;Mm19G040452;Mm19G041159;MmUnG044924	K03885+K02111+K02111+K02134+K01535+K02260+K00234+K02148+K01507
Metabolism	Amino acid metabolism	Lysine degradation	6	274	0.989852	1	ko00310	Mm04G011193;Mm07G018726;Mm09G022934;Mm11G026075;Mm11G026540;MmUnG044089	K11426+K11430+K11426+K11426+K11426+K11426
Metabolism	Carbohydrate metabolism	Ascorbate and aldarate metabolism	7	308	0.990817	1	ko00053	Mm01G002627;Mm02G005713;Mm04G009114;Mm08G019441;Mm08G019974;Mm09G022535;Mm19G040998	K00012+K00699+K08232+K16190+K19642+K19642+K00423
Metabolism	Biosynthesis of other secondary metabolites	Flavonoid biosynthesis	1	115	0.996049	1	ko00941	Mm11G025817	K13065
Genetic Information Processing	Replication and repair	Mismatch repair	2	166	0.996903	1	ko03430	Mm06G015844;Mm08G021433	K10858+K03111
Metabolism	Amino acid metabolism	Valine, leucine and isoleucine degradation	1	134	0.998423	1	ko00280	Mm01G002572	K00826
Genetic Information Processing	Replication and repair	DNA replication	2	196	0.999159	1	ko03030	Mm07G018813;Mm08G021433	K04799+K03111
Cellular Processes	Transport and catabolism	Peroxisome	8	419	0.999269	1	ko04146	Mm01G001589;Mm02G003795;Mm07G017897;Mm08G020143;Mm08G020826;Mm14G032141;Mm14G033093;Mm15G035014	K13354+K13347+K03426+K03781+K04564+K00031+K00106+K01897
Metabolism	Carbohydrate metabolism	Galactose metabolism	11	525	0.999477	1	ko00052	Mm01G001547;Mm01G002930;Mm01G003560;Mm02G004928;Mm04G009452;Mm05G012947;Mm08G019967;Mm08G020226;Mm11G025987;Mm14G033263;MmUnG046010	K01190+K12309+K18819+K00844+K00850+K01187+K00011+K18819+K00844+K07407+K12309
Metabolism	Energy metabolism	Photosynthesis	2	209	0.999526	1	ko00195	Mm05G012458;Mm05G012489	K02111+K02111
Genetic Information Processing	Transcription	RNA polymerase	10	498	0.999545	1	ko03020	Mm03G007062;Mm07G017247;Mm07G018931;Mm07G019037;Mm13G030645;Mm13G030932;Mm16G036301;Mm18G038503;Mm19G040445;MmUnG045986	K03006+K03027+K03002+K03021+K03006+K03004+K03006+K03018+K14721+K02999
Genetic Information Processing	Translation	Ribosome	12	587	0.999798	1	ko03010	Mm05G013269;Mm06G013825;Mm07G018577;Mm11G025958;Mm12G027632;Mm12G028150;Mm16G035202;Mm16G035507;Mm16G036594;Mm17G036823;Mm17G037025;MmUnG044241	K02988+K02932+K02967+K02984+K02949+K02886+K02925+K02936+K02866+K02942+K02882+K02984
Metabolism	Lipid metabolism	Cutin, suberine and wax biosynthesis	1	197	0.999926	1	ko00073	Mm02G004164	K13407
Metabolism	Glycan biosynthesis and metabolism	Other glycan degradation	4	353	0.99996	1	ko00511	Mm01G001547;Mm01G002930;Mm07G017418;MmUnG046010	K01190+K12309+K17108+K12309
Metabolism	Carbohydrate metabolism	Pentose and glucuronate interconversions	10	578	0.999968	1	ko00040	Mm01G002627;Mm02G005713;Mm08G019441;Mm08G019967;Mm08G020887;Mm08G021479;Mm11G025588;Mm11G025673;Mm11G026093;Mm11G027260	K00012+K00699+K16190+K00011+K01051+K01051+K01051+K01051+K01051+K01051
Metabolism	Metabolism of other amino acids	Selenocompound metabolism	3	479	1	1	ko00450	Mm08G019700;Mm17G037778;MmUnG045874	K08247+K08247+K08247

## Sheet: kegg enrich-downgene
Supplementary Table S4 The KEGG pathway enrichment of significantly down-regulated genes.
KEGG_A_class	KEGG_B_class	Pathway	out (1285)	All (16000)	Pvalue	Qvalue	Pathway ID	Genes	K_IDs
Metabolism	Energy metabolism	Photosynthesis	118	209	2.8e-74	3.62e-72	ko00195	Mm01G000224;Mm01G000386;Mm01G000415;Mm01G001479;Mm01G002682;Mm01G002683;Mm01G003672;Mm01G003673;Mm02G004043;Mm02G004076;Mm02G004137;Mm02G005071;Mm02G005653;Mm03G006842;Mm03G007465;Mm03G007468;Mm03G007470;Mm03G007471;Mm03G007907;Mm03G008039;Mm03G008188;Mm03G008317;Mm03G008585;Mm04G008836;Mm04G009153;Mm04G009655;Mm04G009664;Mm04G009809;Mm04G010463;Mm04G010731;Mm05G011429;Mm05G012010;Mm05G012053;Mm0…	K02111+K02634+K02703+K08906+K02111+K02111+K02689+K02706+K02699+K02693+K02693+K02112+K02111+K02109+K02689+K02634+K02689+K02705+K02690+K02704+K02691+K08901+K02111+K02689+K02692+K02636+K02636+K02689+K02639+K02112+K02634+K02112+K02641+K02692+K02717+K08902+K02689+K02639+K02639+K08901+K02721+K02721+K08903+K02699+K02699+K02634+K02693+K02698+K02108+K02690+K02705+K02705+K02703+K02111+K02112+K02111+K02634+…
Metabolism	Global and overview maps	Metabolic pathways	768	7035	1.52e-32	9.79e-31	ko01100	Mm01G000214;Mm01G000224;Mm01G000296;Mm01G000313;Mm01G000386;Mm01G000415;Mm01G000492;Mm01G000759;Mm01G000870;Mm01G001076;Mm01G001161;Mm01G001212;Mm01G001254;Mm01G001267;Mm01G001289;Mm01G001651;Mm01G001752;Mm01G001807;Mm01G001908;Mm01G002017;Mm01G002107;Mm01G002114;Mm01G002115;Mm01G002138;Mm01G002159;Mm01G002160;Mm01G002186;Mm01G002238;Mm01G002361;Mm01G002437;Mm01G002459;Mm01G002476;Mm01G002682;Mm0…	K05894+K02111+K00121+K01078+K02634+K02703+K01823+K01962+K05572+K00660+K00660+K13065+K15744+K00434+K07437+K00083+K12640+K01623+K13648+K01623+K00854+K00700+K01647+K00218+K08912+K08912+K00083+K01757+K01623+K01610+K00860+K00860+K02111+K02111+K08232+K20144+K00891+K00387+K20144+K03526+K03404+K10775+K10258+K01778+K01597+K15227+K03844+K01100+K02367+K01724+K01193+K00008+K01183+K00225+K01209+K00951+K02689+…
Metabolism	Energy metabolism	Photosynthesis - antenna proteins	26	31	3.03e-24	1.3e-22	ko00196	Mm01G002159;Mm01G002160;Mm03G007295;Mm03G007318;Mm03G007626;Mm03G007628;Mm04G010093;Mm05G013229;Mm07G016718;Mm07G018441;Mm07G019026;Mm07G019027;Mm08G020395;Mm10G024129;Mm11G026261;Mm11G026493;Mm11G026494;Mm11G026496;Mm12G028786;Mm12G028787;Mm16G035290;Mm17G037075;Mm18G039443;Mm19G040589;Mm19G040685;MmUnG044047	K08912+K08912+K14172+K14172+K08910+K08910+K08917+K08908+K08909+K08908+K08912+K08912+K08907+K08912+K08917+K08912+K08912+K08912+K08913+K08913+K08914+K08908+K08912+K08916+K08911+K08913
Metabolism	Global and overview maps	Biosynthesis of secondary metabolites	393	3266	1.4e-19	4.5e-18	ko01110	Mm01G000214;Mm01G000296;Mm01G000492;Mm01G000759;Mm01G000788;Mm01G001076;Mm01G001161;Mm01G001212;Mm01G001254;Mm01G001401;Mm01G001651;Mm01G001752;Mm01G001807;Mm01G002017;Mm01G002114;Mm01G002115;Mm01G002121;Mm01G002138;Mm01G002186;Mm01G002238;Mm01G002247;Mm01G002272;Mm01G002361;Mm01G002437;Mm01G002544;Mm01G002729;Mm01G002755;Mm01G002780;Mm01G002858;Mm01G002914;Mm01G002946;Mm01G002997;Mm01G003022;Mm0…	K05894+K00121+K01823+K01962+K15086+K00660+K00660+K13065+K15744+K13071+K00083+K12640+K01623+K01623+K00700+K01647+K12742+K00218+K00083+K01757+K11778+K11778+K01623+K01610+K13545+K20144+K00891+K20144+K03526+K03404+K10775+K10258+K01778+K01597+K15227+K01193+K00225+K00873+K13066+K00021+K01568+K01188+K13508+K01623+K01592+K01592+K13600+K13508+K13508+K15918+K18368+K18368+K01859+K00939+K00869+K00869+K01823+…
Metabolism	Carbohydrate metabolism	Glyoxylate and dicarboxylate metabolism	41	162	2.16e-11	5.58e-10	ko00630	Mm01G002115;Mm02G004970;Mm03G007466;Mm03G007473;Mm04G009747;Mm04G009900;Mm05G011381;Mm05G011874;Mm05G012011;Mm05G012858;Mm05G013139;Mm05G013467;Mm06G015899;Mm07G019195;Mm08G019486;Mm08G020142;Mm08G021155;Mm08G021180;Mm08G021230;Mm08G021231;Mm08G021240;Mm09G023078;Mm09G023219;Mm10G024171;Mm10G024717;Mm10G025182;Mm11G027488;Mm17G036761;Mm17G037167;Mm17G037868;Mm18G038310;Mm18G038317;Mm18G038319;Mm1…	K01647+K15918+K01601+K01601+K11517+K00026+K00830+K01601+K01601+K02437+K00281+K15893+K01647+K15919+K14272+K03781+K00600+K00600+K01602+K01602+K01602+K01915+K01915+K01601+K00830+K00605+K19269+K02437+K00281+K00600+K01601+K01601+K01601+K01601+K01647+K01602+K01602+K00600+K01601+K01601+K11517
Metabolism	Energy metabolism	Carbon fixation in photosynthetic organisms	49	221	4.4e-11	9.45e-10	ko00710	Mm01G001807;Mm01G002017;Mm01G002361;Mm01G002437;Mm01G003403;Mm02G004376;Mm02G004929;Mm02G004988;Mm03G007261;Mm03G007288;Mm03G007309;Mm03G007466;Mm03G007473;Mm04G009281;Mm04G009282;Mm04G009900;Mm05G011874;Mm05G012011;Mm05G012071;Mm07G017466;Mm07G019221;Mm08G019486;Mm08G020289;Mm08G021196;Mm08G021230;Mm08G021231;Mm08G021240;Mm10G024006;Mm10G024171;Mm10G024664;Mm11G026147;Mm12G028368;Mm12G028410;Mm1…	K01623+K01623+K01623+K01610+K01100+K01623+K00029+K00029+K01623+K00855+K00855+K01601+K01601+K00855+K00855+K00026+K01601+K01601+K01623+K01610+K00615+K14272+K00051+K01807+K01602+K01602+K01602+K01783+K01601+K05298+K01623+K00855+K00855+K00927+K00029+K03841+K00029+K00615+K01601+K01601+K01601+K01601+K01602+K01602+K01623+K01100+K01100+K01601+K01601
Organismal Systems	Environmental adaptation	Circadian rhythm - plant	38	186	6.81e-08	1.1e-06	ko04712	Mm01G000458;Mm01G000496;Mm01G001076;Mm01G001161;Mm01G001983;Mm01G002591;Mm01G002924;Mm02G004605;Mm02G004757;Mm02G006307;Mm03G007693;Mm04G008828;Mm04G009650;Mm04G009659;Mm05G011942;Mm05G012848;Mm05G013414;Mm07G016846;Mm07G019197;Mm08G021508;Mm09G023295;Mm11G026794;Mm11G027178;Mm12G027779;Mm12G028480;Mm14G032499;Mm15G034137;Mm17G037677;Mm18G038446;Mm18G038547;Mm18G039306;Mm19G040102;Mm19G040440;Mm1…	K16223+K16223+K00660+K00660+K16221+K12135+K12133+K10143+K10143+K16221+K16222+K12126+K12135+K12135+K12133+K03115+K12135+K10143+K12135+K16222+K12135+K12133+K16221+K12126+K12135+K16222+K03097+K12126+K12135+K12135+K12133+K12133+K00660+K12126+K16222+K16222+K12135+K12133
Metabolism	Metabolism of cofactors and vitamins	Porphyrin and chlorophyll metabolism	33	156	2.1e-07	3e-06	ko00860	Mm01G001401;Mm01G002138;Mm01G002544;Mm01G002914;Mm02G004540;Mm03G006441;Mm03G008458;Mm06G015923;Mm07G017360;Mm07G017950;Mm07G019089;Mm10G024719;Mm11G027005;Mm11G027374;Mm12G029288;Mm12G029751;Mm13G030861;Mm13G030884;Mm13G030916;Mm14G031782;Mm14G032835;Mm14G032957;Mm14G033471;Mm14G033556;Mm17G036940;Mm18G039053;Mm18G039142;Mm19G041169;MmUnG041803;MmUnG042317;MmUnG042373;MmUnG042738;MmUnG043782	K13071+K00218+K13545+K03404+K13600+K18010+K02492+K08099+K00231+K00510+K01885+K19073+K01719+K00699+K00510+K02259+K04035+K04035+K03403+K00699+K13544+K13544+K00699+K00699+K01885+K03405+K02303+K03428+K01885+K00510+K00510+K08099+K03403
Metabolism	Metabolism of terpenoids and polyketides	Terpenoid backbone biosynthesis	31	152	1.12e-06	1.45e-05	ko00900	Mm01G000492;Mm01G002121;Mm01G002247;Mm01G002272;Mm01G002858;Mm01G003074;Mm02G003860;Mm02G006137;Mm02G006148;Mm02G006242;Mm02G006275;Mm03G007918;Mm03G008647;Mm04G009378;Mm04G009858;Mm04G009884;Mm04G010658;Mm05G011873;Mm05G012015;Mm05G012148;Mm07G016453;Mm07G016531;Mm09G023551;Mm13G031094;Mm14G033059;Mm14G033084;Mm14G033366;Mm19G041025;MmUnG042415;MmUnG043999;MmUnG044984	K01823+K12742+K11778+K11778+K03526+K01597+K00021+K00869+K00869+K01823+K12742+K00099+K00787+K01662+K03527+K03527+K01662+K01662+K00021+K13789+K15891+K03527+K05356+K11778+K03526+K03526+K12742+K00099+K00938+K15891+K01662
Metabolism	Biosynthesis of other secondary metabolites	Isoflavonoid biosynthesis	10	23	4.67e-06	5.47e-05	ko00943	Mm04G009276;Mm07G019217;Mm09G022292;Mm12G028839;Mm12G028847;Mm15G034167;Mm15G034176;MmUnG041937;MmUnG042044;MmUnG043471	K13266+K13265+K13264+K13266+K13266+K13264+K13264+K13265+K13266+K13264
Metabolism	Global and overview maps	Carbon metabolism	84	652	9.4e-06	0.000101	ko01200	Mm01G000296;Mm01G000759;Mm01G001807;Mm01G002017;Mm01G002115;Mm01G002361;Mm01G002437;Mm01G003403;Mm02G003776;Mm02G004376;Mm02G004929;Mm02G004970;Mm02G004988;Mm03G006972;Mm03G007261;Mm03G007288;Mm03G007309;Mm03G007466;Mm03G007473;Mm04G008831;Mm04G009281;Mm04G009282;Mm04G009747;Mm04G009900;Mm04G010751;Mm05G011381;Mm05G011874;Mm05G012011;Mm05G012071;Mm05G012759;Mm05G012858;Mm05G013139;Mm05G013467;Mm0…	K00121+K01962+K01623+K01623+K01647+K01623+K01610+K01100+K00873+K01623+K00029+K15918+K00029+K01834+K01623+K00855+K00855+K01601+K01601+K05605+K00855+K00855+K11517+K00026+K00131+K00830+K01601+K01601+K01623+K00161+K02437+K00281+K15893+K01647+K01610+K15919+K00615+K14272+K03781+K00051+K00600+K00600+K01807+K01602+K01602+K01602+K00640+K01738+K01783+K01601+K05298+K00830+K00605+K01623+K19269+K00855+K00855+…
Metabolism	Lipid metabolism	alpha-Linolenic acid metabolism	25	123	1.27e-05	0.000126	ko00592	Mm01G000214;Mm03G006632;Mm04G009685;Mm04G010692;Mm05G013365;Mm06G014861;Mm06G014880;Mm06G015538;Mm06G016059;Mm07G019266;Mm09G022836;Mm09G022837;Mm11G025457;Mm11G026074;Mm11G026523;Mm13G030327;Mm13G030328;Mm13G030430;Mm16G035701;Mm16G036401;Mm18G039015;Mm18G039018;Mm18G039019;Mm18G039020;Mm19G041090	K05894+K08241+K16818+K08241+K05894+K00454+K00454+K16818+K07513+K08241+K10526+K10526+K16818+K05894+K05894+K08241+K08241+K01723+K00232+K00454+K00454+K00454+K00454+K00454+K10526
Metabolism	Biosynthesis of other secondary metabolites	Flavonoid biosynthesis	22	115	0.000107132	0.000987	ko00941	Mm01G001076;Mm01G001161;Mm01G001212;Mm02G005341;Mm03G007467;Mm05G012269;Mm05G012278;Mm06G016275;Mm07G018023;Mm07G019101;Mm11G025815;Mm12G029523;Mm13G031149;Mm14G033070;Mm15G034736;Mm15G035004;Mm17G037692;Mm19G040440;Mm19G041217;Mm19G041218;MmUnG043649;MmUnG044212	K00660+K00660+K13065+K01859+K01859+K00588+K01859+K09754+K13065+K13082+K13065+K00588+K00487+K01859+K01859+K13065+K00487+K00660+K13065+K13065+K01859+K13065
Metabolism	Metabolism of terpenoids and polyketides	Monoterpenoid biosynthesis	14	63	0.000384693	0.00321	ko00902	Mm01G000788;Mm01G002729;Mm01G002780;Mm05G012948;Mm05G012950;Mm06G014329;Mm09G022193;Mm10G024753;Mm11G026791;Mm13G031157;Mm14G032394;Mm18G038957;Mm18G038958;Mm19G040257	K15086+K20144+K20144+K15095+K15095+K15086+K15095+K15095+K15095+K15095+K15095+K15086+K15086+K15095
Environmental Information Processing	Signal transduction	Plant hormone signal transduction	89	778	0.000398059	0.00321	ko04075	Mm01G002440;Mm01G002983;Mm02G003713;Mm02G003868;Mm02G004182;Mm02G004719;Mm02G005767;Mm03G006871;Mm03G007376;Mm04G008828;Mm04G009412;Mm04G009719;Mm05G011422;Mm05G013509;Mm05G013651;Mm07G016774;Mm07G017347;Mm07G018837;Mm07G019049;Mm07G019083;Mm07G019196;Mm07G019251;Mm08G019703;Mm08G021527;Mm08G021697;Mm09G022697;Mm09G023059;Mm09G023631;Mm10G023647;Mm10G024697;Mm11G025697;Mm11G025714;Mm11G026576;Mm1…	K13422+K14516+K14432+K14493+K14484+K14496+K14497+K14491+K14496+K12126+K14488+K14503+K14498+K14496+K13464+K14431+K14432+K14502+K13422+K14496+K14493+K16189+K13464+K14492+K14484+K13464+K14484+K14484+K13415+K14431+K14488+K14488+K14491+K14486+K14493+K14493+K14484+K12126+K14488+K14488+K14488+K14488+K14488+K14488+K14488+K14488+K14488+K14488+K14488+K14488+K14488+K14488+K14488+K14493+K14497+K14493+K14492+…
Metabolism	Amino acid metabolism	Glycine, serine and threonine metabolism	26	161	0.000466748	0.00354	ko00260	Mm02G004970;Mm03G006972;Mm05G011381;Mm05G012643;Mm05G012858;Mm05G013139;Mm05G013467;Mm07G019195;Mm07G019374;Mm08G019486;Mm08G021155;Mm08G021180;Mm10G023972;Mm10G024717;Mm10G025182;Mm13G031373;Mm16G035337;Mm17G036761;Mm17G037167;Mm17G037868;Mm18G039551;Mm19G040358;Mm19G040824;MmUnG041582;MmUnG041785;MmUnG044124	K15918+K01834+K00830+K00108+K02437+K00281+K15893+K15919+K01696+K14272+K00600+K00600+K00133+K00830+K00605+K00306+K00276+K02437+K00281+K00600+K00133+K00600+K12524+K00306+K01696+K01696
Metabolism	Metabolism of terpenoids and polyketides	Sesquiterpenoid and triterpenoid biosynthesis	8	29	0.00157601	0.0113	ko00909	Mm07G016453;Mm09G022275;Mm11G026551;Mm11G027032;MmUnG043999;MmUnG044903;MmUnG044904;MmUnG044907	K15891+K00511+K00801+K00511+K15891+K15800+K15800+K15800
Metabolism	Biosynthesis of other secondary metabolites	Flavone and flavonol biosynthesis	5	13	0.00246818	0.0165	ko00944	Mm07G018082;Mm09G022292;Mm15G034167;Mm15G034176;MmUnG043471	K13269+K13264+K13264+K13264+K13264
Metabolism	Metabolism of cofactors and vitamins	Thiamine metabolism	10	45	0.00255605	0.0165	ko00730	Mm01G000313;Mm02G005991;Mm04G009378;Mm04G010658;Mm05G011873;Mm07G017928;Mm08G019521;Mm15G034968;Mm19G040179;MmUnG044984	K01078+K00939+K01662+K01662+K01662+K00949+K06949+K00878+K03147+K01662
Metabolism	Biosynthesis of other secondary metabolites	Phenylpropanoid biosynthesis	47	394	0.00403958	0.0248	ko00940	Mm01G001212;Mm01G001651;Mm01G002186;Mm01G002946;Mm02G003779;Mm02G004252;Mm02G004976;Mm02G005014;Mm03G006621;Mm03G008227;Mm03G008511;Mm04G009676;Mm05G012269;Mm06G015463;Mm06G015528;Mm06G016275;Mm07G016426;Mm07G016870;Mm07G018023;Mm08G019670;Mm08G021332;Mm08G021334;Mm09G022971;Mm10G024024;Mm10G025174;Mm11G025815;Mm12G029523;Mm13G030667;Mm13G031149;Mm14G032092;Mm14G033118;Mm15G035004;Mm16G035193;Mm1…	K13065+K00083+K00083+K10775+K13066+K01188+K18368+K18368+K06892+K01904+K00430+K05350+K00588+K00430+K00430+K09754+K00083+K05350+K13065+K01188+K05349+K05349+K12355+K00430+K00430+K13065+K00588+K00430+K00487+K00083+K00430+K13065+K00430+K00430+K10775+K10775+K00487+K00083+K00430+K13066+K00430+K13065+K13065+K09753+K13065+K09753+K01188
Metabolism	Energy metabolism	Nitrogen metabolism	11	63	0.010954	0.0619	ko00910	Mm01G002688;Mm02G006243;Mm02G006388;Mm04G010066;Mm05G012423;Mm07G016445;Mm07G016449;Mm09G023078;Mm09G023219;Mm19G039921;MmUnG044929	K02575+K10534+K01673+K01673+K01673+K00366+K00366+K01915+K01915+K01673+K01673
Metabolism	Metabolism of cofactors and vitamins	One carbon pool by folate	8	39	0.0110447	0.0619	ko00670	Mm02G003775;Mm06G015802;Mm08G021155;Mm08G021180;Mm10G025182;Mm17G037868;Mm19G040358;MmUnG044092	K13990+K00288+K00600+K00600+K00605+K00600+K00600+K01938
Metabolism	Biosynthesis of other secondary metabolites	Monobactam biosynthesis	5	19	0.0148812	0.08	ko00261	Mm09G022121;Mm10G023972;Mm11G026385;Mm18G039551;Mm19G040824	K13811+K00133+K13811+K00133+K12524
Metabolism	Biosynthesis of other secondary metabolites	Stilbenoid, diarylheptanoid and gingerol biosynthesis	12	75	0.0158793	0.0819	ko00945	Mm01G001212;Mm05G012269;Mm06G016275;Mm07G018023;Mm11G025815;Mm12G029523;Mm13G031149;Mm15G035004;Mm17G037692;Mm19G041217;Mm19G041218;MmUnG044212	K13065+K00588+K09754+K13065+K13065+K00588+K00487+K13065+K00487+K13065+K13065+K13065
Metabolism	Metabolism of cofactors and vitamins	Biotin metabolism	7	35	0.0194534	0.0965	ko00780	Mm04G010243;Mm04G010284;Mm06G015489;Mm08G021798;Mm09G023545;Mm14G032440;MmUnG045892	K00059+K00059+K09458+K09458+K01942+K00059+K00059
Metabolism	Metabolism of cofactors and vitamins	Lipoic acid metabolism	3	8	0.0212906	0.102	ko00785	Mm10G024146;Mm16G036404;Mm18G039392	K03644+K03801+K03644
Metabolism	Lipid metabolism	Biosynthesis of unsaturated fatty acids	10	61	0.022586	0.104	ko01040	Mm01G002997;Mm06G016059;Mm07G019146;Mm09G022287;Mm14G033273;Mm15G034896;Mm15G034910;Mm16G035701;Mm17G037085;Mm19G040765	K10258+K07513+K01068+K10258+K10258+K03921+K03921+K00232+K10251+K10256
Metabolism	Biosynthesis of other secondary metabolites	Isoquinoline alkaloid biosynthesis	16	118	0.0265799	0.118	ko00950	Mm02G004510;Mm02G004522;Mm05G011811;Mm05G011813;Mm07G016367;Mm07G016745;Mm07G016748;Mm07G018870;Mm11G025373;Mm11G026886;Mm12G028685;Mm14G032383;Mm15G034245;Mm16G035337;Mm17G037962;MmUnG043452	K01592+K01592+K14976+K14976+K00422+K00422+K00422+K14976+K00815+K14975+K00815+K13390+K01592+K00276+K00422+K14975
Metabolism	Glycan biosynthesis and metabolism	Glycosphingolipid biosynthesis - lacto and neolacto series	3	9	0.0300579	0.127	ko00601	Mm07G019307;MmUnG044997;MmUnG045002	K01988+K01988+K01988
Metabolism	Energy metabolism	Sulfur metabolism	11	73	0.0305831	0.127	ko00920	Mm01G002459;Mm01G002476;Mm01G002772;Mm02G006157;Mm03G006630;Mm05G013471;Mm08G021779;Mm09G022121;Mm09G022122;Mm11G026385;Mm14G032373	K00860+K00860+K00387+K15422+K00860+K00380+K00640+K13811+K01738+K13811+K00860
Metabolism	Metabolism of cofactors and vitamins	Ubiquinone and other terpenoid-quinone biosynthesis	15	111	0.0319211	0.129	ko00130	Mm03G007450;Mm03G008227;Mm05G012142;Mm07G016880;Mm07G018619;Mm08G019444;Mm11G025373;Mm11G026233;Mm12G028256;Mm12G028685;Mm13G031149;Mm17G037515;Mm17G037692;MmUnG042193;MmUnG044392	K19222+K01904+K03809+K03183+K12502+K01661+K00815+K02548+K08680+K00815+K00487+K03809+K00487+K03183+K03809
Metabolism	Metabolism of terpenoids and polyketides	Carotenoid biosynthesis	12	84	0.035589	0.138	ko00906	Mm01G001254;Mm03G006738;Mm04G009182;Mm04G009261;Mm07G018244;Mm07G018727;Mm11G027299;Mm12G029155;Mm12G029188;Mm14G033292;Mm14G033294;MmUnG045046	K15744+K09842+K17911+K09843+K09843+K17911+K15746+K09841+K09841+K09841+K09841+K09842
Metabolism	Metabolism of terpenoids and polyketides	Zeatin biosynthesis	11	75	0.036431	0.138	ko00908	Mm03G006728;Mm04G008743;Mm04G010558;Mm06G015180;Mm06G015183;Mm06G015184;Mm06G015213;Mm06G015215;Mm06G015216;Mm15G034436;MmUnG045210	K13496+K00279+K00279+K13496+K13496+K13496+K13496+K13496+K13496+K13496+K00279
Metabolism	Lipid metabolism	Linoleic acid metabolism	9	60	0.0489172	0.18	ko00591	Mm06G014861;Mm06G014880;Mm07G017453;Mm08G021024;Mm16G036401;Mm18G039015;Mm18G039018;Mm18G039019;Mm18G039020	K00454+K00454+K15718+K07409+K00454+K00454+K00454+K00454+K00454
Metabolism	Metabolism of terpenoids and polyketides	Diterpenoid biosynthesis	14	109	0.0536511	0.192	ko00904	Mm06G015010;Mm06G015011;Mm06G015012;Mm06G015014;Mm06G015553;Mm11G025425;Mm11G027173;Mm13G029914;Mm13G031208;Mm15G034569;Mm15G034574;MmUnG041593;MmUnG041605;MmUnG043606	K13070+K13070+K13070+K13070+K17982+K04124+K05282+K04124+K17961+K13070+K13070+K17961+K17961+K13070
Metabolism	Global and overview maps	Biosynthesis of amino acids	53	530	0.0565218	0.196	ko01230	Mm01G001807;Mm01G002017;Mm01G002115;Mm01G002361;Mm01G002755;Mm01G003022;Mm01G003300;Mm02G003776;Mm02G004376;Mm03G006972;Mm03G007261;Mm03G007375;Mm03G007475;Mm03G008271;Mm05G012071;Mm06G015167;Mm06G015320;Mm06G015899;Mm07G016650;Mm07G018664;Mm07G019221;Mm07G019374;Mm08G019486;Mm08G021155;Mm08G021180;Mm08G021196;Mm08G021779;Mm09G022122;Mm09G023078;Mm09G023219;Mm10G023972;Mm10G024006;Mm11G025373;Mm1…	K01623+K01623+K01647+K01623+K00891+K01778+K15227+K00873+K01623+K01834+K01623+K01438+K00789+K01953+K01623+K01657+K01243+K01647+K01609+K13832+K00615+K01696+K14272+K00600+K00600+K01807+K00640+K01738+K01915+K01915+K00133+K01783+K00815+K01623+K00927+K00815+K00873+K00948+K00615+K00616+K00600+K01953+K14677+K01647+K01476+K00800+K00133+K00600+K12524+K01623+K01696+K01696+K01953
Genetic Information Processing	Translation	Ribosome	58	587	0.0576737	0.196	ko03010	Mm01G000223;Mm01G001149;Mm01G001416;Mm01G002775;Mm02G004030;Mm03G006456;Mm03G006845;Mm03G007236;Mm03G008234;Mm04G008874;Mm04G010386;Mm04G010949;Mm04G010991;Mm06G015403;Mm06G016128;Mm07G017397;Mm07G018821;Mm07G019334;Mm08G021407;Mm09G022329;Mm09G023336;Mm09G023411;Mm10G024225;Mm10G024227;Mm10G024235;Mm10G024248;Mm10G024268;Mm10G024707;Mm10G025119;Mm11G025319;Mm11G025374;Mm11G026284;Mm12G027716;Mm1…	K02992+K02902+K02863+K02970+K02879+K02945+K02883+K02886+K02882+K02958+K02882+K02992+K02886+K02952+K02883+K02925+K02914+K02886+K02909+K02992+K02916+K02883+K02874+K02992+K02992+K02967+K02874+K02958+K02988+K02933+K02968+K02881+K02958+K02946+K02992+K02934+K02934+K02945+K02939+K02939+K02931+K02881+K02882+K02992+K02886+K02992+K02874+K02921+K02866+K02866+K02882+K02886+K02909+K02931+K02896+K02992+K02961+…
Metabolism	Lipid metabolism	Glycerolipid metabolism	29	276	0.0823003	0.272	ko00561	Mm02G004260;Mm02G004634;Mm02G004729;Mm02G004730;Mm02G004970;Mm02G005969;Mm03G007583;Mm04G009674;Mm05G013108;Mm06G015037;Mm06G015045;Mm06G015689;Mm06G015729;Mm06G015834;Mm07G017359;Mm07G018804;Mm07G018862;Mm09G022639;Mm11G026275;Mm12G028140;Mm12G028323;Mm14G033417;Mm16G035159;Mm17G036916;Mm17G037142;Mm18G038994;Mm18G039315;Mm19G040791;MmUnG045327	K13508+K00679+K13508+K13508+K15918+K01054+K00128+K01054+K01046+K09480+K09480+K00679+K00679+K01054+K00679+K13506+K00679+K01054+K01054+K13519+K03715+K01054+K01046+K13508+K01046+K01054+K13508+K13513+K16816
Metabolism	Amino acid metabolism	Phenylalanine metabolism	10	77	0.0877798	0.283	ko00360	Mm01G002946;Mm07G017662;Mm10G024807;Mm10G024809;Mm10G024810;Mm11G025373;Mm12G028685;Mm16G035337;Mm16G036166;Mm16G036171	K10775+K07253+K01426+K01426+K01426+K00815+K00815+K00276+K10775+K10775
Metabolism	Amino acid metabolism	Arginine and proline metabolism	14	118	0.0906258	0.285	ko00330	Mm03G007583;Mm05G012394;Mm05G013333;Mm08G021724;Mm08G021727;Mm08G021764;Mm10G024807;Mm10G024809;Mm10G024810;Mm11G026043;Mm18G039176;Mm18G039516;Mm19G041338;Mm19G041339	K00128+K00472+K17839+K00137+K00137+K00137+K01426+K01426+K01426+K12259+K01476+K17839+K00137+K00137
Metabolism	Amino acid metabolism	Lysine biosynthesis	4	22	0.0949838	0.29	ko00300	Mm01G003022;Mm10G023972;Mm18G039551;Mm19G040824	K01778+K00133+K00133+K12524
Metabolism	Lipid metabolism	Synthesis and degradation of ketone bodies	3	14	0.0966256	0.29	ko00072	Mm05G011323;Mm06G013902;Mm12G028019	K01640+K01640+K01640
Metabolism	Metabolism of other amino acids	Cyanoamino acid metabolism	17	152	0.102662	0.301	ko00460	Mm02G004252;Mm03G008581;Mm03G008582;Mm04G009335;Mm04G009336;Mm04G009676;Mm07G016870;Mm08G019670;Mm08G021155;Mm08G021180;Mm08G021332;Mm08G021334;Mm11G026898;Mm17G037868;Mm19G040358;Mm19G040560;MmUnG045162	K01188+K13030+K13030+K13030+K13030+K05350+K05350+K01188+K00600+K00600+K05349+K05349+K12153+K00600+K00600+K13030+K01188
Metabolism	Amino acid metabolism	Tryptophan metabolism	14	121	0.10581	0.303	ko00380	Mm03G007583;Mm06G014719;Mm07G017913;Mm07G018551;Mm08G019939;Mm08G020142;Mm08G021024;Mm08G021564;Mm10G024807;Mm10G024809;Mm10G024810;Mm14G031651;Mm19G040866;MmUnG044685	K00128+K07408+K11816+K11816+K07408+K03781+K07409+K16903+K01426+K01426+K01426+K11818+K11818+K11816
Metabolism	Biosynthesis of other secondary metabolites	Anthocyanin biosynthesis	4	24	0.121838	0.342	ko00942	Mm01G001229;Mm01G001286;Mm02G005681;Mm02G005684	K12338+K12938+K12938+K12938
Metabolism	Glycan biosynthesis and metabolism	Glycosphingolipid biosynthesis - globo and isoglobo series	4	25	0.136349	0.374	ko00603	Mm06G014950;Mm07G019307;MmUnG044997;MmUnG045002	K00780+K01988+K01988+K01988
Metabolism	Lipid metabolism	Steroid biosynthesis	8	64	0.139229	0.374	ko00100	Mm05G013297;Mm07G018192;Mm07G018194;Mm09G022275;Mm11G026551;Mm11G027032;Mm18G039394;Mm19G040868	K07748+K01853+K01853+K00511+K00801+K00511+K00559+K01052
Metabolism	Lipid metabolism	Fatty acid biosynthesis	13	118	0.151814	0.398	ko00061	Mm01G000759;Mm04G010243;Mm04G010284;Mm06G015489;Mm06G016077;Mm08G021736;Mm08G021798;Mm11G026111;Mm12G029216;Mm14G032440;Mm15G034896;Mm15G034910;MmUnG045892	K01962+K00059+K00059+K09458+K10782+K10781+K09458+K01897+K10781+K00059+K03921+K03921+K00059
Metabolism	Biosynthesis of other secondary metabolites	Penicillin and cephalosporin biosynthesis	1	2	0.154179	0.398	ko00311	Mm05G012840	K19200
Metabolism	Global and overview maps	Fatty acid metabolism	20	198	0.17056	0.431	ko01212	Mm01G000759;Mm01G002997;Mm04G010243;Mm04G010284;Mm06G015489;Mm06G016059;Mm07G016360;Mm08G021736;Mm08G021798;Mm09G022287;Mm11G026111;Mm12G029216;Mm14G032440;Mm14G033273;Mm15G034896;Mm15G034910;Mm16G035701;Mm17G037085;Mm19G040765;MmUnG045892	K01962+K10258+K00059+K00059+K09458+K07513+K00249+K10781+K09458+K10258+K01897+K10781+K00059+K10258+K03921+K03921+K00232+K10251+K10256+K00059
Metabolism	Amino acid metabolism	Phenylalanine, tyrosine and tryptophan biosynthesis	11	101	0.186455	0.457	ko00400	Mm01G002755;Mm01G003300;Mm06G015167;Mm07G016650;Mm07G018664;Mm07G019374;Mm11G025373;Mm12G028685;Mm18G039180;MmUnG041785;MmUnG044124	K00891+K15227+K01657+K01609+K13832+K01696+K00815+K00815+K00800+K01696+K01696
Metabolism	Amino acid metabolism	Tyrosine metabolism	13	123	0.18789	0.457	ko00350	Mm01G000296;Mm02G004510;Mm02G004522;Mm07G016367;Mm07G016745;Mm07G016748;Mm07G017662;Mm11G025373;Mm12G028685;Mm15G034245;Mm16G035337;Mm17G037577;Mm17G037962	K00121+K01592+K01592+K00422+K00422+K00422+K07253+K00815+K00815+K01592+K00276+K01555+K00422
Metabolism	Nucleotide metabolism	Purine metabolism	21	219	0.228077	0.54	ko00230	Mm01G002459;Mm01G002476;Mm01G003668;Mm02G003776;Mm02G004763;Mm02G004796;Mm02G005991;Mm03G006630;Mm05G011751;Mm05G012748;Mm05G012784;Mm06G015157;Mm09G022108;Mm09G022121;Mm11G026385;Mm11G027460;Mm14G032373;Mm15G034448;Mm15G034837;Mm17G036766;Mm18G038886	K00860+K00860+K00951+K00873+K00951+K00951+K00939+K00860+K02083+K14977+K01509+K06966+K03787+K13811+K13811+K06966+K00860+K06966+K00873+K00948+K01488
Metabolism	Amino acid metabolism	Alanine, aspartate and glutamate metabolism	8	73	0.230374	0.54	ko00250	Mm03G008271;Mm05G011381;Mm08G019486;Mm09G023078;Mm09G023219;Mm10G024717;Mm18G038521;MmUnG044363	K01953+K00830+K14272+K01915+K01915+K00830+K01953+K01953
Metabolism	Glycan biosynthesis and metabolism	Glycosphingolipid biosynthesis - ganglio series	8	74	0.241622	0.557	ko00604	Mm04G009482;Mm06G014894;Mm06G014950;Mm09G022923;Mm11G025550;Mm15G034788;Mm16G036357;MmUnG046230	K12309+K12309+K00780+K12309+K12309+K12309+K12309+K12309
Metabolism	Amino acid metabolism	Arginine biosynthesis	6	53	0.250561	0.567	ko00220	Mm03G007375;Mm08G019486;Mm09G023078;Mm09G023219;Mm18G038809;Mm18G039176	K01438+K14272+K01915+K01915+K14677+K01476
Metabolism	Lipid metabolism	Fatty acid elongation	7	66	0.278015	0.618	ko00062	Mm01G002997;Mm07G018203;Mm07G019146;Mm09G022287;Mm09G023247;Mm14G033273;Mm17G037085	K10258+K15397+K01068+K10258+K15397+K10258+K10251
Metabolism	Biosynthesis of other secondary metabolites	Biosynthesis of various secondary metabolites - part 2	1	5	0.342073	0.748	ko00998	Mm19G041163	K02078
Genetic Information Processing	Folding, sorting and degradation	Sulfur relay system	3	26	0.34803	0.748	ko04122	Mm06G015323;Mm15G034353;Mm17G036856	K11996+K11996+K03635
Metabolism	Carbohydrate metabolism	Pentose phosphate pathway	17	193	0.382066	0.808	ko00030	Mm01G001807;Mm01G002017;Mm01G002361;Mm02G004376;Mm03G007261;Mm04G010751;Mm05G012071;Mm07G019221;Mm08G021196;Mm10G024006;Mm11G026147;Mm16G035208;Mm17G036766;Mm17G036881;Mm17G037048;MmUnG041613;MmUnG041727	K01623+K01623+K01623+K01623+K01623+K00131+K01623+K00615+K01807+K01783+K01623+K03841+K00948+K00615+K00616+K00852+K01623
Metabolism	Metabolism of cofactors and vitamins	Nicotinate and nicotinamide metabolism	5	51	0.390593	0.809	ko00760	Mm08G021304;Mm09G022108;Mm11G026287;Mm14G031770;Mm19G040533	K00858+K03787+K01240+K01240+K00858
Metabolism	Biosynthesis of other secondary metabolites	Indole alkaloid biosynthesis	1	6	0.394929	0.809	ko00901	Mm01G002238	K01757
Metabolism	Carbohydrate metabolism	Inositol phosphate metabolism	15	175	0.435529	0.867	ko00562	Mm02G004399;Mm02G006157;Mm04G010455;Mm05G011750;Mm11G025583;Mm11G025678;Mm11G027581;Mm11G027602;Mm12G028095;Mm12G028270;Mm12G028274;Mm13G030554;MmUnG043146;MmUnG044069;MmUnG044161	K00913+K15422+K20279+K01092+K20279+K20279+K20279+K20279+K00010+K00913+K00913+K20279+K01114+K20279+K20279
Metabolism	Metabolism of other amino acids	beta-Alanine metabolism	12	139	0.441045	0.867	ko00410	Mm03G007583;Mm04G008831;Mm05G013333;Mm08G021724;Mm08G021727;Mm08G021764;Mm11G026043;Mm16G035337;Mm16G035701;Mm18G039516;Mm19G041338;Mm19G041339	K00128+K05605+K17839+K00137+K00137+K00137+K12259+K00276+K00232+K17839+K00137+K00137
Metabolism	Biosynthesis of other secondary metabolites	Caffeine metabolism	1	7	0.443542	0.867	ko00232	Mm08G021024	K07409
Metabolism	Global and overview maps	2-Oxocarboxylic acid metabolism	11	131	0.484761	0.933	ko01210	Mm01G002115;Mm03G007375;Mm06G015899;Mm08G019486;Mm10G023972;Mm11G026898;Mm14G031651;Mm18G038809;Mm18G039167;Mm18G039551;Mm19G040866	K01647+K01438+K01647+K14272+K00133+K12153+K11818+K14677+K01647+K00133+K11818
Metabolism	Amino acid metabolism	Valine, leucine and isoleucine degradation	11	134	0.515653	0.962	ko00280	Mm03G007583;Mm03G008609;Mm04G008831;Mm04G008991;Mm05G011323;Mm06G013902;Mm06G016059;Mm07G016360;Mm11G025988;Mm11G026005;Mm12G028019	K00128+K00166+K05605+K09699+K01640+K01640+K07513+K00249+K00020+K00020+K01640
Metabolism	Biosynthesis of other secondary metabolites	Glucosinolate biosynthesis	3	34	0.521464	0.962	ko00966	Mm11G026898;Mm14G031651;Mm19G040866	K12153+K11818+K11818
Metabolism	Metabolism of other amino acids	Glutathione metabolism	19	235	0.522876	0.962	ko00480	Mm01G001267;Mm02G004485;Mm03G006696;Mm03G006834;Mm03G007095;Mm04G009301;Mm06G015426;Mm06G015493;Mm07G018673;Mm11G026193;Mm11G026195;Mm11G026198;Mm11G026200;Mm11G026566;Mm12G028423;Mm12G028760;Mm12G028762;Mm18G038937;MmUnG041624	K00434+K00434+K00799+K00434+K15428+K07232+K01256+K01256+K00799+K00799+K00799+K00799+K00799+K07232+K07232+K00799+K00799+K07232+K00434
Metabolism	Metabolism of terpenoids and polyketides	Polyketide sugar unit biosynthesis	1	9	0.529373	0.962	ko00523	Mm04G008797	K00067
Metabolism	Carbohydrate metabolism	Glycolysis / Gluconeogenesis	23	291	0.563921	1	ko00010	Mm01G000296;Mm01G001807;Mm01G002017;Mm01G002361;Mm01G002437;Mm02G003776;Mm02G004003;Mm02G004376;Mm02G006426;Mm03G006972;Mm03G007261;Mm03G007583;Mm04G010751;Mm05G012071;Mm05G012109;Mm05G012759;Mm07G017466;Mm11G026147;Mm12G028591;Mm15G034837;Mm16G035208;MmUnG041727;MmUnG043342	K00121+K01623+K01623+K01623+K01610+K00873+K01568+K01623+K01785+K01834+K01623+K00128+K00131+K01623+K01792+K00161+K01610+K01623+K00927+K00873+K03841+K01623+K01785
Metabolism	Metabolism of terpenoids and polyketides	Brassinosteroid biosynthesis	2	24	0.585096	1	ko00905	Mm01G001752;Mm05G012131	K12640+K09587
Metabolism	Glycan biosynthesis and metabolism	Glycosaminoglycan degradation	7	90	0.591619	1	ko00531	Mm04G009482;Mm06G014894;Mm09G022923;Mm11G025550;Mm15G034788;Mm16G036357;MmUnG046230	K12309+K12309+K12309+K12309+K12309+K12309+K12309
Metabolism	Carbohydrate metabolism	Pyruvate metabolism	15	194	0.599932	1	ko00620	Mm01G000759;Mm01G002437;Mm02G003776;Mm02G004673;Mm02G004929;Mm02G004988;Mm03G007583;Mm04G009900;Mm05G012759;Mm07G017466;Mm08G020289;Mm13G029891;Mm15G034837;Mm16G035618;MmUnG043275	K01962+K01610+K00873+K00158+K00029+K00029+K00128+K00026+K00161+K01610+K00051+K00029+K00873+K00029+K01759
Metabolism	Carbohydrate metabolism	Citrate cycle (TCA cycle)	8	106	0.62497	1	ko00020	Mm01G002115;Mm01G002437;Mm04G009900;Mm05G012759;Mm06G015899;Mm07G017466;Mm18G039167;Mm18G039834	K01647+K01610+K00026+K00161+K01647+K01610+K01647+K01648
Metabolism	Nucleotide metabolism	Pyrimidine metabolism	10	137	0.669874	1	ko00240	Mm02G006208;Mm03G008641;Mm03G008657;Mm06G013898;Mm06G015157;Mm09G022108;Mm11G026287;Mm11G027460;Mm14G031770;Mm15G034448	K01489+K00876+K00876+K09903+K06966+K03787+K01240+K06966+K01240+K06966
Metabolism	Lipid metabolism	Fatty acid degradation	7	100	0.701528	1	ko00071	Mm01G000296;Mm03G007583;Mm04G008888;Mm06G016059;Mm07G016360;Mm11G026111;Mm16G035701	K00121+K00128+K18880+K07513+K00249+K01897+K00232
Metabolism	Carbohydrate metabolism	Fructose and mannose metabolism	12	173	0.742756	1	ko00051	Mm01G001807;Mm01G002017;Mm01G002361;Mm01G003594;Mm02G004376;Mm03G007261;Mm05G012071;Mm11G026147;Mm14G032695;Mm16G035208;Mm19G041007;MmUnG041727	K01623+K01623+K01623+K00008+K01623+K01623+K01623+K01623+K00008+K03841+K00966+K01623
Metabolism	Carbohydrate metabolism	Butanoate metabolism	3	49	0.764884	1	ko00650	Mm05G011323;Mm06G013902;Mm12G028019	K01640+K01640+K01640
Metabolism	Biosynthesis of other secondary metabolites	Tropane, piperidine and pyridine alkaloid biosynthesis	3	50	0.776801	1	ko00960	Mm11G025373;Mm12G028685;Mm16G035337	K00815+K00815+K00276
Metabolism	Amino acid metabolism	Histidine metabolism	2	35	0.78378	1	ko00340	Mm02G003775;Mm03G007583	K13990+K00128
Metabolism	Carbohydrate metabolism	Starch and sucrose metabolism	41	568	0.787387	1	ko00500	Mm01G002114;Mm01G003517;Mm02G004252;Mm03G007565;Mm03G007663;Mm03G008409;Mm04G008772;Mm04G009395;Mm04G009487;Mm04G009676;Mm04G010435;Mm04G010482;Mm04G010585;Mm07G016566;Mm07G016870;Mm07G019046;Mm07G019063;Mm08G019670;Mm08G019705;Mm08G021332;Mm08G021334;Mm10G023693;Mm10G024130;Mm10G024790;Mm10G024997;Mm11G025243;Mm11G027553;Mm17G036788;Mm17G037565;Mm18G038467;Mm18G038635;Mm18G038831;Mm18G039287;Mm1…	K00700+K01193+K01188+K00696+K19891+K01177+K16055+K01193+K01193+K05350+K00975+K00975+K16055+K01179+K05350+K13679+K01194+K01188+K19891+K05349+K05349+K16055+K19891+K00750+K19891+K19891+K01210+K01179+K16055+K01177+K01193+K00975+K01838+K00703+K01187+K01187+K19891+K00688+K01177+K01193+K01188
Metabolism	Metabolism of terpenoids and polyketides	Limonene and pinene degradation	1	19	0.796408	1	ko00903	Mm03G007583	K00128
Metabolism	Lipid metabolism	Sphingolipid metabolism	12	192	0.853899	1	ko00600	Mm02G004315;Mm04G009482;Mm06G014894;Mm09G022595;Mm09G022923;Mm11G025550;Mm11G026818;Mm13G031008;Mm13G031446;Mm15G034788;Mm16G036357;MmUnG046230	K04628+K12309+K12309+K04710+K12309+K12309+K04628+K04628+K00654+K12309+K12309+K12309
Environmental Information Processing	Signal transduction	MAPK signaling pathway - plant	34	496	0.857039	1	ko04016	Mm01G002440;Mm01G002723;Mm01G002725;Mm01G002983;Mm02G004719;Mm02G005767;Mm03G007376;Mm04G010400;Mm05G011422;Mm05G013509;Mm07G017462;Mm07G018980;Mm07G018992;Mm07G019031;Mm07G019049;Mm07G019083;Mm08G020142;Mm09G022815;Mm10G023908;Mm11G025908;Mm12G029242;Mm13G029917;Mm13G030772;Mm13G031284;Mm13G031551;Mm14G032628;Mm14G033158;Mm15G034089;Mm15G034265;Mm17G036715;Mm17G036780;Mm19G041106;MmUnG042837;MmU…	K13422+K13420+K13420+K14516+K14496+K14497+K14496+K13447+K14498+K14496+K13447+K13420+K13420+K13424+K13422+K14496+K03781+K13424+K13420+K13420+K14497+K16224+K02183+K13420+K14496+K14496+K13420+K13420+K14515+K14509+K13422+K13420+K13447+K13424
Cellular Processes	Transport and catabolism	Peroxisome	28	419	0.870369	1	ko04146	Mm01G003505;Mm02G006137;Mm02G006148;Mm03G008621;Mm04G009041;Mm04G009747;Mm04G009995;Mm05G011323;Mm05G011381;Mm05G012815;Mm05G012890;Mm06G013902;Mm06G015557;Mm06G016059;Mm08G020142;Mm10G024717;Mm11G026111;Mm12G028019;Mm12G028590;Mm13G031373;Mm14G032323;Mm16G035303;Mm16G035701;Mm16G036319;Mm16G036332;MmUnG041582;MmUnG045702;MmUnG046127	K13352+K00869+K00869+K13342+K13337+K11517+K13348+K01640+K00830+K12261+K08726+K01640+K08726+K07513+K03781+K00830+K01897+K01640+K13237+K00306+K12261+K13348+K00232+K04565+K04565+K00306+K06664+K11517
Metabolism	Metabolism of cofactors and vitamins	Vitamin B6 metabolism	1	25	0.876889	1	ko00750	Mm06G015761	K06215
Cellular Processes	Transport and catabolism	Autophagy - other eukaryotes	3	63	0.890913	1	ko04136	Mm07G017070;Mm16G035306;Mm18G039170	K08341+K08341+K08341
Metabolism	Amino acid metabolism	Cysteine and methionine metabolism	13	217	0.896636	1	ko00270	Mm03G007475;Mm04G009796;Mm04G009900;Mm05G012766;Mm06G015320;Mm08G021779;Mm09G022122;Mm09G022123;Mm10G023972;Mm11G025373;Mm12G028685;Mm18G039551;Mm19G040824	K00789+K05933+K00026+K01761+K01243+K00640+K01738+K08967+K00133+K00815+K00815+K00133+K12524
Metabolism	Lipid metabolism	Ether lipid metabolism	6	113	0.899411	1	ko00565	Mm02G004315;Mm11G026818;Mm12G028140;Mm13G031008;Mm18G039336;MmUnG043146	K04628+K04628+K13519+K04628+K13510+K01114
Metabolism	Metabolism of cofactors and vitamins	Riboflavin metabolism	1	28	0.904274	1	ko00740	Mm01G000313	K01078
Metabolism	Lipid metabolism	Arachidonic acid metabolism	3	68	0.918537	1	ko00590	Mm05G012890;Mm06G015557;Mm19G040321	K08726+K08726+K15717
Metabolism	Lipid metabolism	Glycerophospholipid metabolism	18	298	0.921644	1	ko00564	Mm02G004260;Mm02G004729;Mm02G004730;Mm03G008522;Mm04G009685;Mm06G015538;Mm07G018804;Mm11G025457;Mm11G025835;Mm12G028140;Mm14G032469;Mm16G035215;Mm17G036864;Mm17G036916;Mm18G039315;Mm18G039336;Mm19G040791;MmUnG043146	K13508+K13508+K13508+K14156+K16818+K16818+K13506+K16818+K01126+K13519+K01126+K06129+K18696+K13508+K13508+K13510+K13513+K01114
Genetic Information Processing	Replication and repair	Mismatch repair	9	166	0.924244	1	ko03430	Mm01G000716;Mm01G001852;Mm01G002617;Mm01G002624;Mm02G003694;Mm06G015575;Mm10G024310;Mm18G039035;MmUnG045082	K07466+K07466+K10755+K10755+K03505+K07466+K07466+K07466+K03505
Genetic Information Processing	Folding, sorting and degradation	Ubiquitin mediated proteolysis	18	307	0.940874	1	ko04120	Mm02G004605;Mm02G004757;Mm03G008608;Mm04G009287;Mm05G012386;Mm05G013131;Mm06G014091;Mm07G016846;Mm07G019068;Mm09G022947;Mm10G025005;Mm13G031456;Mm14G031817;Mm14G032518;Mm14G033458;Mm14G033568;Mm18G038748;Mm19G040199	K10143+K10143+K03875+K10144+K10573+K10144+K03872+K10143+K04506+K03350+K10577+K03354+K10456+K10573+K10594+K10594+K03094+K03875
Genetic Information Processing	Replication and repair	DNA replication	10	196	0.95821	1	ko03030	Mm01G000716;Mm01G001852;Mm01G002617;Mm01G002624;Mm02G003694;Mm06G015575;Mm10G024310;Mm18G039035;MmUnG044883;MmUnG045082	K07466+K07466+K10755+K10755+K03505+K07466+K07466+K07466+K02209+K03505
Genetic Information Processing	Translation	Aminoacyl-tRNA biosynthesis	10	199	0.963162	1	ko00970	Mm04G009227;Mm06G014264;Mm06G015001;Mm06G015886;Mm07G019089;Mm09G022130;Mm13G030598;Mm17G036940;Mm19G040527;MmUnG041803	K01883+K01890+K01870+K01890+K01885+K04567+K02433+K01885+K01872+K01885
Genetic Information Processing	Translation	Ribosome biogenesis in eukaryotes	9	184	0.964587	1	ko03008	Mm01G002508;Mm05G012848;Mm07G018781;Mm07G018812;Mm10G023843;Mm15G034137;Mm15G034201;Mm17G036949;MmUnG044596	K14549+K03115+K14574+K14574+K03264+K03097+K07562+K14544+K13288
Metabolism	Carbohydrate metabolism	Ascorbate and aldarate metabolism	17	308	0.965203	1	ko00053	Mm01G001267;Mm01G002684;Mm01G003651;Mm02G004485;Mm03G006834;Mm03G007583;Mm03G008381;Mm04G008855;Mm07G017236;Mm11G027374;Mm14G031782;Mm14G033471;Mm14G033556;Mm17G036782;Mm18G038830;MmUnG041624;MmUnG043410	K00434+K08232+K00225+K00434+K00434+K00128+K14190+K10046+K14190+K00699+K00699+K00699+K00699+K12447+K12447+K00434+K12447
Metabolism	Carbohydrate metabolism	Propanoate metabolism	5	124	0.974919	1	ko00640	Mm01G000759;Mm03G008609;Mm04G008831;Mm04G008991;Mm16G035701	K01962+K00166+K05605+K09699+K00232
Metabolism	Amino acid metabolism	Lysine degradation	14	274	0.97764	1	ko00310	Mm02G003708;Mm02G005439;Mm03G007583;Mm08G021724;Mm08G021727;Mm08G021764;Mm11G027373;Mm13G031373;Mm14G031610;Mm19G041338;Mm19G041339;MmUnG041582;MmUnG043253;MmUnG045339	K11423+K11426+K00128+K00137+K00137+K00137+K11426+K00306+K11426+K00137+K00137+K00306+K11426+K11426
Genetic Information Processing	Replication and repair	Nucleotide excision repair	10	215	0.981714	1	ko03420	Mm01G000716;Mm01G001678;Mm01G001852;Mm01G002617;Mm01G002624;Mm02G003694;Mm06G015575;Mm10G024310;Mm18G039035;MmUnG045082	K07466+K03143+K07466+K10755+K10755+K03505+K07466+K07466+K07466+K03505
Metabolism	Glycan biosynthesis and metabolism	N-Glycan biosynthesis	3	95	0.984977	1	ko00510	Mm01G003381;Mm05G012446;Mm05G012478	K03844+K00737+K00737
Metabolism	Metabolism of cofactors and vitamins	Folate biosynthesis	2	76	0.986977	1	ko00790	Mm01G003449;Mm17G036856	K01724+K03635
Metabolism	Glycan biosynthesis and metabolism	Various types of N-glycan biosynthesis	1	62	0.994489	1	ko00513	Mm01G003381	K03844
Cellular Processes	Transport and catabolism	Phagosome	6	173	0.995557	1	ko04145	Mm01G002212;Mm02G004595;Mm04G009850;Mm05G011696;Mm12G028181;Mm12G028214	K04392+K07375+K07897+K05692+K07897+K07897
Genetic Information Processing	Translation	mRNA surveillance pathway	18	382	0.996345	1	ko03015	Mm03G006771;Mm03G008653;Mm04G009997;Mm04G011256;Mm05G012124;Mm07G016775;Mm07G018235;Mm08G021022;Mm12G028160;Mm12G028187;Mm12G028775;Mm16G035329;Mm16G036240;Mm17G037622;Mm17G037863;Mm18G039432;Mm19G041355;MmUnG042180	K12876+K03456+K11584+K13126+K14399+K14962+K06269+K14411+K14411+K14411+K03456+K04354+K14411+K11584+K14962+K14411+K13126+K14407
Genetic Information Processing	Replication and repair	Base excision repair	4	139	0.996758	1	ko03410	Mm01G001978;Mm02G003694;Mm14G031904;MmUnG045082	K10773+K03505+K10773+K03505
Metabolism	Carbohydrate metabolism	Pentose and glucuronate interconversions	30	578	0.997318	1	ko00040	Mm01G002107;Mm01G003594;Mm02G004639;Mm03G007070;Mm03G007078;Mm03G007757;Mm03G007878;Mm07G018434;Mm07G018536;Mm09G022731;Mm09G022875;Mm09G023151;Mm10G024006;Mm11G027374;Mm12G027791;Mm12G028100;Mm13G031233;Mm14G031782;Mm14G032695;Mm14G032720;Mm14G033471;Mm14G033556;Mm16G036153;Mm17G036782;Mm17G037330;Mm17G037819;Mm18G038830;Mm19G041457;MmUnG042204;MmUnG043410	K00854+K00008+K01051+K01213+K01184+K01051+K01051+K01051+K01728+K01051+K01184+K01051+K01783+K00699+K01051+K01051+K01728+K00699+K00008+K01051+K00699+K00699+K01728+K12447+K01051+K01051+K12447+K01051+K01184+K12447
Genetic Information Processing	Replication and repair	Homologous recombination	9	243	0.998039	1	ko03440	Mm01G000716;Mm01G001791;Mm01G001852;Mm02G003694;Mm03G007994;Mm06G015575;Mm10G024310;Mm18G039035;MmUnG045082	K07466+K12173+K07466+K03505+K03553+K07466+K07466+K07466+K03505
Genetic Information Processing	Transcription	Basal transcription factors	1	79	0.998681	1	ko03022	Mm01G001678	K03143
Genetic Information Processing	Folding, sorting and degradation	Protein export	1	85	0.999204	1	ko03060	MmUnG046057	K03116
Metabolism	Glycan biosynthesis and metabolism	Other glycan degradation	14	353	0.999345	1	ko00511	Mm04G009482;Mm06G014894;Mm07G017938;Mm07G018785;Mm09G022856;Mm09G022923;Mm11G025550;Mm15G034788;Mm16G036357;Mm17G036938;Mm17G037650;Mm18G039456;Mm19G041078;MmUnG046230	K12309+K12309+K01191+K01206+K01206+K12309+K12309+K12309+K12309+K01206+K01191+K01206+K01206+K12309
Metabolism	Lipid metabolism	Cutin, suberine and wax biosynthesis	5	197	0.999706	1	ko00073	Mm04G009415;Mm05G012670;Mm06G014665;Mm07G019137;Mm14G031871	K15405+K15398+K17991+K15398+K13407
Metabolism	Glycan biosynthesis and metabolism	Glycosylphosphatidylinositol(GPI)-anchor biosynthesis	2	128	0.99974	1	ko00563	Mm03G006663;Mm19G040240	K01127+K03860
Genetic Information Processing	Folding, sorting and degradation	Proteasome	1	104	0.999839	1	ko03050	Mm12G028443	K03038
Metabolism	Carbohydrate metabolism	Galactose metabolism	22	525	0.999876	1	ko00052	Mm01G003517;Mm02G006426;Mm04G009395;Mm04G009482;Mm04G009487;Mm06G014894;Mm06G016284;Mm09G022923;Mm11G025550;Mm15G034788;Mm16G035897;Mm16G036357;Mm17G036688;Mm17G036782;Mm18G038635;Mm18G038830;Mm19G040450;Mm19G040451;MmUnG043342;MmUnG043410;MmUnG043850;MmUnG046230	K01193+K01785+K01193+K12309+K01193+K12309+K01784+K12309+K12309+K12309+K01784+K12309+K01784+K12447+K01193+K12447+K01187+K01187+K01785+K12447+K01193+K12309
Metabolism	Carbohydrate metabolism	Amino sugar and nucleotide sugar metabolism	32	744	0.999988	1	ko00520	Mm01G001908;Mm01G003602;Mm01G003667;Mm02G003957;Mm03G006879;Mm04G008855;Mm04G010435;Mm04G010482;Mm06G015143;Mm06G016284;Mm07G018517;Mm11G025231;Mm11G026265;Mm11G027499;Mm13G030717;Mm13G030782;Mm13G030797;Mm13G030837;Mm15G034696;Mm15G034730;Mm16G035897;Mm17G036641;Mm17G036688;Mm17G036782;Mm17G038201;Mm18G038830;Mm18G038831;Mm19G040690;Mm19G041007;Mm19G041400;Mm19G041405;MmUnG043410	K13648+K01183+K01209+K00326+K15920+K10046+K00975+K00975+K12448+K01784+K00326+K12448+K15920+K12448+K15920+K08678+K08678+K01209+K12448+K12448+K01784+K08678+K01784+K12447+K01183+K12447+K00975+K00326+K00966+K01183+K01183+K12447
Genetic Information Processing	Folding, sorting and degradation	RNA degradation	10	354	0.99999	1	ko03018	Mm03G007945;Mm03G008620;Mm04G011256;Mm08G020291;Mm09G022805;Mm15G034558;Mm17G037811;Mm17G037954;Mm19G039985;Mm19G041355	K10643+K12581+K13126+K12581+K12581+K12581+K12622+K14442+K12581+K13126
Genetic Information Processing	Translation	RNA transport	17	496	0.999993	1	ko03013	Mm01G000520;Mm02G004282;Mm03G006771;Mm04G011256;Mm07G017380;Mm07G018508;Mm10G025005;Mm11G027308;Mm12G028163;Mm12G029733;Mm13G030815;Mm13G031276;Mm15G034201;Mm16G035962;Mm17G036693;Mm18G039079;Mm19G041355	K03260+K03239+K12876+K13126+K03260+K12160+K10577+K18213+K03239+K03257+K03251+K14317+K07562+K18213+K03239+K14317+K13126
Cellular Processes	Transport and catabolism	Endocytosis	18	515	0.999994	1	ko04144	Mm02G006279;Mm04G009850;Mm07G018196;Mm07G018777;Mm07G018871;Mm08G019449;Mm11G026355;Mm12G028181;Mm12G028214;Mm12G028888;Mm14G032197;Mm15G034091;Mm15G034360;Mm15G034475;Mm17G037125;Mm18G039382;MmUnG042263;MmUnG043593	K19366+K07897+K10396+K07904+K11247+K07937+K10364+K07897+K07897+K07937+K19476+K07904+K12472+K12492+K12471+K07904+K07904+K03283
Environmental Information Processing	Membrane transport	ABC transporters	8	383	1	1	ko02010	Mm01G002239;Mm02G004878;Mm07G017310;Mm11G026220;Mm11G027417;Mm12G028580;Mm15G034905;MmUnG045759	K10440+K05665+K05681+K05681+K05658+K02065+K05681+K05658
Metabolism	Metabolism of other amino acids	Selenocompound metabolism	4	479	1	1	ko00450	Mm05G012766;Mm09G022121;Mm09G022289;Mm11G026385	K01761+K13811+K08247+K13811
Genetic Information Processing	Transcription	RNA polymerase	9	498	1	1	ko03020	Mm02G003722;Mm02G004193;Mm03G007472;Mm04G008965;Mm18G038313;Mm18G038315;Mm18G038555;Mm18G038940;MmUnG044197	K03006+K03040+K03043+K03046+K03043+K03046+K03040+K03006+K03040
Genetic Information Processing	Transcription	Spliceosome	13	623	1	1	ko03040	Mm03G006771;Mm05G013189;Mm07G018352;Mm08G020499;Mm10G024954;Mm11G027267;Mm13G031366;Mm13G031453;Mm16G036607;Mm17G037811;Mm19G041091;Mm19G041103;MmUnG043593	K12876+K12896+K12825+K12831+K12741+K12741+K11087+K11099+K12821+K12622+K11086+K11086+K03283
Environmental Information Processing	Signal transduction	Phosphatidylinositol signaling system	17	605	1	1	ko04070	Mm01G000984;Mm02G004399;Mm02G006157;Mm04G010455;Mm05G011750;Mm05G012737;Mm11G025583;Mm11G025678;Mm11G027581;Mm11G027602;Mm12G028270;Mm12G028274;Mm13G030554;Mm13G030772;Mm19G040586;MmUnG044069;MmUnG044161	K13024+K00913+K15422+K20279+K01092+K13024+K20279+K20279+K20279+K20279+K00913+K00913+K20279+K02183+K13024+K20279+K20279
Genetic Information Processing	Folding, sorting and degradation	Protein processing in endoplasmic reticulum	21	730	1	1	ko04141	Mm02G004409;Mm04G009857;Mm04G009883;Mm05G013360;Mm06G015087;Mm07G016723;Mm07G017445;Mm07G017515;Mm08G021511;Mm10G025195;Mm12G028898;Mm14G031905;Mm14G031906;Mm14G031910;Mm14G033286;Mm14G033289;Mm18G038748;Mm18G038919;Mm18G039735;MmUnG042872;MmUnG043593	K14016+K10666+K10666+K10666+K13993+K10950+K07953+K07953+K13993+K13993+K09517+K10085+K10085+K10085+K09503+K09503+K03094+K13993+K14006+K13993+K03283
Organismal Systems	Environmental adaptation	Plant-pathogen interaction	32	891	1	1	ko04626	Mm01G002723;Mm01G002725;Mm02G004058;Mm04G008888;Mm04G010400;Mm06G016259;Mm07G017462;Mm07G018203;Mm07G018980;Mm07G018992;Mm07G019031;Mm09G022815;Mm09G023247;Mm10G023908;Mm10G024319;Mm11G025908;Mm13G029917;Mm13G030398;Mm13G030772;Mm13G031180;Mm13G031284;Mm14G033157;Mm14G033158;Mm15G034075;Mm15G034089;Mm16G035511;Mm16G035538;Mm16G036559;Mm17G036941;Mm19G041106;MmUnG042837;MmUnG042965	K13420+K13420+K13448+K18880+K13447+K13448+K13447+K15397+K13420+K13420+K13424+K13424+K15397+K13420+K13433+K13420+K16224+K13457+K02183+K13448+K13420+K13428+K13420+K13459+K13420+K04368+K04368+K13429+K13436+K13420+K13447+K13424

## Sheet: go enrich -BP-upgene
Supplementary Table S4 The GO biological_pathway enrichment of significantly up-regulated genes.
GO ID	Description	out (1024)	All (15133)	pvalue	p.adjust	Genes
GO:0009451	RNA modification	111	629	2.37e-21	8.33e-18	Mm01G000154;Mm01G000231;Mm01G000274;Mm01G001153;Mm01G001484;Mm01G002243;Mm01G002377;Mm01G002629;Mm01G002675;Mm01G002848;Mm01G003446;Mm01G003477;Mm02G004396;Mm02G004475;Mm02G005528;Mm02G006278;Mm03G006447;Mm03G006605;Mm03G006624;Mm03G006675;Mm03G006691;Mm03G007712;Mm04G008964;Mm04G009337;Mm04G009981;Mm04G010302;Mm04G010542;Mm04G010560;Mm04G010779;Mm05G011418;Mm06G014016;Mm06G014316;Mm06G014334;Mm0…
GO:0043412	macromolecule modification	312	3326	3.52e-11	6.18e-08	Mm01G000154;Mm01G000231;Mm01G000274;Mm01G000463;Mm01G000612;Mm01G000619;Mm01G000620;Mm01G000986;Mm01G001106;Mm01G001153;Mm01G001220;Mm01G001318;Mm01G001432;Mm01G001445;Mm01G001463;Mm01G001472;Mm01G001474;Mm01G001484;Mm01G001490;Mm01G001720;Mm01G001726;Mm01G001854;Mm01G001879;Mm01G001901;Mm01G001959;Mm01G001987;Mm01G002028;Mm01G002030;Mm01G002243;Mm01G002303;Mm01G002304;Mm01G002305;Mm01G002306;Mm0…
GO:0009266	response to temperature stimulus	102	851	7.49e-09	8.76e-06	Mm01G001138;Mm01G002102;Mm01G002711;Mm01G003281;Mm01G003546;Mm01G003560;Mm01G003592;Mm02G003938;Mm02G004082;Mm02G004133;Mm02G005335;Mm02G005361;Mm02G005742;Mm03G006451;Mm03G006505;Mm03G007145;Mm03G007441;Mm04G008858;Mm04G009053;Mm04G009114;Mm04G009242;Mm04G009308;Mm04G009392;Mm04G009492;Mm04G010398;Mm05G011543;Mm05G012054;Mm05G013153;Mm06G015623;Mm06G015712;Mm06G016121;Mm06G016225;Mm07G017006;Mm0…
GO:0090305	nucleic acid phosphodiester bond hydrolysis	103	909	1.14e-07	9.82e-05	Mm01G000231;Mm01G000274;Mm01G001153;Mm01G001484;Mm01G001817;Mm01G002377;Mm01G002675;Mm01G002848;Mm01G003446;Mm01G003477;Mm02G004396;Mm02G004475;Mm02G005528;Mm02G006278;Mm03G006447;Mm03G006605;Mm03G006624;Mm03G006675;Mm03G006691;Mm03G007712;Mm04G008930;Mm04G008964;Mm04G009337;Mm04G009542;Mm04G010302;Mm04G010542;Mm04G010560;Mm04G010779;Mm06G014016;Mm06G014316;Mm06G014334;Mm06G014818;Mm06G015809;Mm0…
GO:0000959	mitochondrial RNA metabolic process	18	64	1.4e-07	9.82e-05	Mm01G000154;Mm01G000231;Mm01G001817;Mm02G006278;Mm03G006624;Mm04G010779;Mm07G018330;Mm11G025214;Mm11G025810;Mm11G026308;Mm12G027938;Mm14G032085;Mm16G036544;Mm19G040051;Mm19G040064;Mm19G040911;Mm19G040912;MmUnG042916
GO:0006458	'de novo' protein folding	15	48	3.39e-07	0.000173434	Mm01G001283;Mm02G004082;Mm02G004133;Mm06G014911;Mm10G023944;Mm12G028842;Mm12G028851;Mm12G029054;Mm12G029060;Mm13G029855;Mm14G031899;Mm16G036220;Mm16G036580;Mm19G040424;MmUnG044681
GO:0010200	response to chitin	39	242	3.46e-07	0.000173434	Mm01G001318;Mm01G003438;Mm04G009134;Mm04G009135;Mm04G009392;Mm04G009492;Mm04G009909;Mm04G010003;Mm05G012690;Mm06G014068;Mm06G015046;Mm06G016121;Mm06G016225;Mm07G019118;Mm08G019937;Mm08G020716;Mm08G021012;Mm08G021655;Mm09G022226;Mm11G025375;Mm11G025920;Mm12G028226;Mm12G028307;Mm12G028494;Mm13G031123;Mm13G031504;Mm14G032821;Mm14G032968;Mm17G036685;Mm17G037483;Mm18G038405;Mm19G040227;MmUnG042576;MmU…
GO:0009409	response to cold	69	581	3.12e-06	0.0013691	Mm01G001138;Mm01G002102;Mm01G003546;Mm01G003560;Mm01G003592;Mm02G005335;Mm02G005361;Mm03G006505;Mm03G007145;Mm03G007441;Mm04G008858;Mm04G009053;Mm04G009114;Mm04G009242;Mm04G009308;Mm04G010398;Mm05G011543;Mm05G012054;Mm05G013153;Mm06G015623;Mm06G016121;Mm06G016225;Mm07G017006;Mm07G017321;Mm07G017324;Mm07G017330;Mm07G017331;Mm07G017654;Mm07G017682;Mm07G018703;Mm07G019105;Mm08G020086;Mm08G020143;Mm0…
GO:0006457	protein folding	24	135	1.14e-05	0.00422362	Mm01G001283;Mm01G002711;Mm01G003162;Mm02G004082;Mm02G004133;Mm06G014911;Mm06G015623;Mm07G018491;Mm09G022499;Mm10G023944;Mm12G028757;Mm12G028797;Mm12G028803;Mm12G028842;Mm12G028851;Mm12G029054;Mm12G029060;Mm13G029855;Mm14G031899;Mm16G036220;Mm16G036580;Mm19G040424;MmUnG041596;MmUnG044681
GO:1900864	mitochondrial RNA modification	13	48	1.2e-05	0.00422362	Mm01G000154;Mm01G000231;Mm02G006278;Mm03G006624;Mm04G010779;Mm07G018330;Mm11G025214;Mm11G026308;Mm12G027938;Mm16G036544;Mm19G040911;Mm19G040912;MmUnG042916
GO:0016556	mRNA modification	18	86	1.43e-05	0.00457414	Mm01G000154;Mm01G000231;Mm01G002629;Mm02G004396;Mm02G006278;Mm04G010779;Mm07G018330;Mm09G022397;Mm09G022426;Mm11G025214;Mm11G026308;Mm12G027938;Mm14G032473;Mm19G040510;Mm19G040911;Mm19G040912;MmUnG042541;MmUnG042916
GO:0007623	circadian rhythm	27	168	2.26e-05	0.00661188	Mm01G001890;Mm01G002105;Mm02G004568;Mm02G005361;Mm03G007145;Mm03G007350;Mm04G009764;Mm04G009951;Mm06G014089;Mm06G014476;Mm06G015497;Mm07G016671;Mm10G024008;Mm11G027068;Mm11G027583;Mm11G027600;Mm12G028492;Mm13G030508;Mm13G031020;Mm16G035189;Mm16G036396;Mm17G037509;Mm19G040510;MmUnG042784;MmUnG044145;MmUnG044386;MmUnG046280
GO:0042493	response to drug	94	916	2.75e-05	0.00726615	Mm01G001138;Mm01G001318;Mm01G001463;Mm01G001472;Mm01G001589;Mm01G001837;Mm01G002378;Mm01G003281;Mm01G003438;Mm02G004568;Mm02G004974;Mm02G005067;Mm02G005361;Mm04G009134;Mm04G009135;Mm04G009392;Mm04G009492;Mm04G009909;Mm04G010003;Mm05G012618;Mm05G012690;Mm05G013358;Mm06G013914;Mm06G014068;Mm06G015046;Mm06G015712;Mm06G015832;Mm06G015841;Mm06G016121;Mm06G016225;Mm07G017480;Mm07G017654;Mm07G017682;Mm0…
GO:0009311	oligosaccharide metabolic process	21	116	2.99e-05	0.00726615	Mm01G002028;Mm03G008617;Mm04G009726;Mm04G009736;Mm05G013149;Mm05G013579;Mm07G016361;Mm07G016752;Mm07G018700;Mm07G018845;Mm08G019835;Mm08G019998;Mm08G019999;Mm08G020004;Mm11G025602;Mm11G025662;Mm11G027108;Mm13G030075;Mm16G036220;Mm17G037351;MmUnG045406
GO:0016310	phosphorylation	143	1532	3.26e-05	0.00726615	Mm01G000612;Mm01G000619;Mm01G000620;Mm01G000986;Mm01G001106;Mm01G001153;Mm01G001220;Mm01G001445;Mm01G001463;Mm01G001472;Mm01G001474;Mm01G001490;Mm01G001720;Mm01G001726;Mm01G001879;Mm01G001901;Mm01G001959;Mm01G001987;Mm01G002030;Mm01G002303;Mm01G002304;Mm01G002305;Mm01G002306;Mm01G002309;Mm01G002431;Mm01G002717;Mm01G003313;Mm02G004039;Mm02G004262;Mm02G004538;Mm02G004662;Mm02G004697;Mm02G004928;Mm0…
GO:0006468	protein phosphorylation	121	1255	3.46e-05	0.00726615	Mm01G000612;Mm01G000619;Mm01G000620;Mm01G000986;Mm01G001106;Mm01G001153;Mm01G001220;Mm01G001445;Mm01G001463;Mm01G001472;Mm01G001474;Mm01G001490;Mm01G001720;Mm01G001726;Mm01G001879;Mm01G001901;Mm01G001959;Mm01G001987;Mm01G002030;Mm01G002303;Mm01G002304;Mm01G002305;Mm01G002306;Mm01G002309;Mm01G003313;Mm02G004039;Mm02G004262;Mm02G004538;Mm02G004662;Mm02G004697;Mm02G005354;Mm02G005371;Mm02G005848;Mm0…
GO:0009408	response to heat	46	367	3.7e-05	0.00726615	Mm01G003281;Mm02G003938;Mm02G004082;Mm02G004133;Mm02G005742;Mm03G006451;Mm03G006505;Mm04G009053;Mm04G009242;Mm04G009392;Mm04G009492;Mm06G015712;Mm06G016121;Mm06G016225;Mm07G017321;Mm07G017324;Mm07G017330;Mm07G017331;Mm07G017480;Mm07G017726;Mm07G018491;Mm07G019295;Mm08G020784;Mm08G021642;Mm09G023622;Mm10G024748;Mm11G025439;Mm11G025513;Mm11G026624;Mm12G028264;Mm12G028494;Mm12G029046;Mm13G031123;Mm1…
GO:0048511	rhythmic process	27	173	3.85e-05	0.00726615	Mm01G001890;Mm01G002105;Mm02G004568;Mm02G005361;Mm03G007145;Mm03G007350;Mm04G009764;Mm04G009951;Mm06G014089;Mm06G014476;Mm06G015497;Mm07G016671;Mm10G024008;Mm11G027068;Mm11G027583;Mm11G027600;Mm12G028492;Mm13G030508;Mm13G031020;Mm16G035189;Mm16G036396;Mm17G037509;Mm19G040510;MmUnG042784;MmUnG044145;MmUnG044386;MmUnG046280
GO:0061077	chaperone-mediated protein folding	16	76	3.93e-05	0.00726615	Mm01G001283;Mm02G004082;Mm02G004133;Mm06G014911;Mm06G015623;Mm07G018491;Mm10G023944;Mm12G028842;Mm12G028851;Mm13G029855;Mm14G031899;Mm16G036220;Mm16G036580;Mm19G040424;MmUnG041596;MmUnG044681
GO:0010243	response to organonitrogen compound	52	447	8.78e-05	0.0154186	Mm01G001318;Mm01G001369;Mm01G001854;Mm01G003438;Mm02G004048;Mm02G004055;Mm02G004262;Mm02G004697;Mm04G009134;Mm04G009135;Mm04G009392;Mm04G009492;Mm04G009909;Mm04G010003;Mm05G012690;Mm06G013914;Mm06G014068;Mm06G015046;Mm06G015832;Mm06G016121;Mm06G016225;Mm07G017838;Mm07G019118;Mm08G019937;Mm08G020716;Mm08G021012;Mm08G021655;Mm09G022226;Mm11G025375;Mm11G025920;Mm12G028226;Mm12G028307;Mm12G028494;Mm1…
GO:0080156	mitochondrial mRNA modification	10	36	9.68e-05	0.0161772	Mm01G000231;Mm02G006278;Mm04G010779;Mm07G018330;Mm11G025214;Mm11G026308;Mm12G027938;Mm19G040911;Mm19G040912;MmUnG042916
GO:0016554	cytidine to uridine editing	6	14	0.000177161	0.0282732	Mm04G010779;Mm06G014016;Mm09G022550;Mm19G040911;Mm19G040912;MmUnG042916
GO:0016070	RNA metabolic process	324	4055	0.000202979	0.0309852	Mm01G000154;Mm01G000231;Mm01G000274;Mm01G000612;Mm01G001057;Mm01G001138;Mm01G001153;Mm01G001346;Mm01G001382;Mm01G001432;Mm01G001484;Mm01G001499;Mm01G001674;Mm01G001740;Mm01G001817;Mm01G001818;Mm01G001829;Mm01G001854;Mm01G001862;Mm01G001890;Mm01G002105;Mm01G002243;Mm01G002377;Mm01G002629;Mm01G002675;Mm01G002848;Mm01G002930;Mm01G003183;Mm01G003438;Mm01G003446;Mm01G003477;Mm01G003546;Mm01G003592;Mm0…
GO:0006793	phosphorus metabolic process	189	2202	0.000212668	0.0311115	Mm01G000463;Mm01G000612;Mm01G000619;Mm01G000620;Mm01G000986;Mm01G001106;Mm01G001153;Mm01G001220;Mm01G001431;Mm01G001445;Mm01G001463;Mm01G001472;Mm01G001474;Mm01G001490;Mm01G001720;Mm01G001726;Mm01G001879;Mm01G001901;Mm01G001959;Mm01G001987;Mm01G002030;Mm01G002303;Mm01G002304;Mm01G002305;Mm01G002306;Mm01G002309;Mm01G002431;Mm01G002627;Mm01G002717;Mm01G002957;Mm01G003108;Mm01G003313;Mm02G003744;Mm0…
GO:0016553	base conversion or substitution editing	6	15	0.000278409	0.0316736	Mm04G010779;Mm06G014016;Mm09G022550;Mm19G040911;Mm19G040912;MmUnG042916
GO:0002215	defense response to nematode	4	6	0.000279972	0.0316736	Mm13G030511;Mm13G030519;Mm18G039051;Mm18G039057
GO:0045041	protein import into mitochondrial intermembrane space	4	6	0.000279972	0.0316736	Mm02G004082;Mm02G004133;Mm13G029855;Mm16G036580
GO:0005992	trehalose biosynthetic process	8	27	0.000297807	0.0316736	Mm03G008617;Mm04G009726;Mm04G009736;Mm05G013149;Mm07G016361;Mm07G016752;Mm07G018845;Mm11G027108
GO:0006952	defense response	128	1411	0.000300312	0.0316736	Mm01G000620;Mm01G000775;Mm01G001463;Mm01G001472;Mm01G002176;Mm01G002378;Mm01G003438;Mm02G003938;Mm02G004039;Mm02G004662;Mm02G005354;Mm02G005371;Mm02G005848;Mm02G005856;Mm02G006288;Mm03G008285;Mm04G008790;Mm04G008930;Mm04G009134;Mm04G009135;Mm04G009657;Mm04G009866;Mm04G009888;Mm04G009909;Mm04G011232;Mm05G011543;Mm05G012645;Mm05G013358;Mm06G014139;Mm06G014636;Mm06G014643;Mm06G015812;Mm06G016107;Mm0…
GO:0000495	box H/ACA snoRNA 3'-end processing	3	3	0.000308985	0.0316736	Mm01G002629;Mm14G032473;MmUnG042541
GO:0006390	transcription from mitochondrial promoter	3	3	0.000308985	0.0316736	Mm11G025810;Mm19G040051;Mm19G040064
GO:0010378	temperature compensation of the circadian clock	3	3	0.000308985	0.0316736	Mm11G027583;Mm11G027600;Mm16G035189
GO:0033979	box H/ACA snoRNA metabolic process	3	3	0.000308985	0.0316736	Mm01G002629;Mm14G032473;MmUnG042541
GO:0034964	box H/ACA snoRNA processing	3	3	0.000308985	0.0316736	Mm01G002629;Mm14G032473;MmUnG042541
GO:0009751	response to salicylic acid	34	269	0.000315744	0.0316736	Mm01G001138;Mm01G001463;Mm01G001472;Mm01G002378;Mm01G003438;Mm02G004568;Mm02G005361;Mm04G009134;Mm04G009135;Mm05G013358;Mm06G014068;Mm08G019998;Mm08G019999;Mm08G020004;Mm08G021655;Mm12G028226;Mm12G028264;Mm12G029054;Mm12G029060;Mm13G031504;Mm14G032251;Mm14G032821;Mm14G032968;Mm15G034997;Mm16G036220;Mm17G037483;Mm19G040227;Mm19G041282;MmUnG042483;MmUnG042583;MmUnG042978;MmUnG043085;MmUnG043500;MmU…
GO:0046677	response to antibiotic	55	506	0.000325554	0.0317506	Mm01G001138;Mm01G001463;Mm01G001472;Mm01G002378;Mm01G003281;Mm01G003438;Mm02G004568;Mm02G005361;Mm04G009134;Mm04G009135;Mm04G009392;Mm04G009492;Mm05G013358;Mm06G014068;Mm06G015712;Mm06G015832;Mm07G017480;Mm07G017654;Mm07G017682;Mm08G019453;Mm08G019998;Mm08G019999;Mm08G020004;Mm08G020143;Mm08G020159;Mm08G021655;Mm11G026624;Mm11G027583;Mm11G027600;Mm12G028226;Mm12G028264;Mm12G028494;Mm12G029054;Mm1…
GO:0009607	response to biotic stimulus	136	1519	0.000337684	0.0320435	Mm01G000443;Mm01G000620;Mm01G000775;Mm01G000832;Mm01G000913;Mm01G001463;Mm01G001472;Mm01G002176;Mm01G002378;Mm01G002711;Mm01G003438;Mm02G003938;Mm02G004039;Mm02G004662;Mm02G005848;Mm02G005856;Mm02G006288;Mm03G006667;Mm03G007170;Mm03G008285;Mm04G008790;Mm04G008930;Mm04G009134;Mm04G009135;Mm04G009866;Mm04G009888;Mm04G009909;Mm04G011232;Mm05G011543;Mm05G012645;Mm05G013358;Mm06G014139;Mm06G014636;Mm0…
GO:0044262	cellular carbohydrate metabolic process	46	405	0.00037805	0.0349298	Mm01G002431;Mm01G002619;Mm01G002625;Mm01G003108;Mm01G003560;Mm02G004928;Mm02G005935;Mm03G008617;Mm04G009158;Mm04G009452;Mm04G009716;Mm04G009726;Mm04G009736;Mm04G009839;Mm05G012855;Mm05G012861;Mm05G013149;Mm05G013579;Mm06G015351;Mm07G016361;Mm07G016752;Mm07G017201;Mm07G018226;Mm07G018700;Mm07G018845;Mm08G019835;Mm08G020226;Mm09G022863;Mm10G024791;Mm11G025987;Mm11G027108;Mm11G027133;Mm12G028249;Mm1…
GO:0005991	trehalose metabolic process	8	28	0.00039242	0.0353279	Mm03G008617;Mm04G009726;Mm04G009736;Mm05G013149;Mm07G016361;Mm07G016752;Mm07G018845;Mm11G027108
GO:0043207	response to external biotic stimulus	135	1513	0.000410851	0.0360624	Mm01G000443;Mm01G000620;Mm01G000775;Mm01G000832;Mm01G000913;Mm01G001463;Mm01G001472;Mm01G002176;Mm01G002378;Mm01G002711;Mm01G003438;Mm02G003938;Mm02G004039;Mm02G004662;Mm02G005848;Mm02G005856;Mm02G006288;Mm03G006667;Mm03G007170;Mm03G008285;Mm04G008790;Mm04G008930;Mm04G009134;Mm04G009135;Mm04G009866;Mm04G009888;Mm04G009909;Mm04G011232;Mm05G011543;Mm05G012645;Mm05G013358;Mm06G014139;Mm06G014636;Mm0…
GO:0044260	cellular macromolecule metabolic process	558	7479	0.000434389	0.0371985	Mm01G000154;Mm01G000231;Mm01G000274;Mm01G000463;Mm01G000612;Mm01G000619;Mm01G000620;Mm01G000986;Mm01G001057;Mm01G001106;Mm01G001138;Mm01G001153;Mm01G001220;Mm01G001318;Mm01G001346;Mm01G001382;Mm01G001432;Mm01G001445;Mm01G001463;Mm01G001472;Mm01G001474;Mm01G001484;Mm01G001490;Mm01G001499;Mm01G001674;Mm01G001720;Mm01G001726;Mm01G001740;Mm01G001817;Mm01G001818;Mm01G001829;Mm01G001854;Mm01G001862;Mm0…
GO:0009251	glucan catabolic process	10	43	0.000473411	0.0395749	Mm01G002903;Mm01G003108;Mm02G005935;Mm05G012855;Mm05G013579;Mm07G018226;Mm09G022863;Mm10G024760;Mm17G037351;MmUnG041854
GO:0051707	response to other organism	134	1509	0.000526805	0.0430143	Mm01G000443;Mm01G000620;Mm01G000775;Mm01G000832;Mm01G000913;Mm01G001463;Mm01G001472;Mm01G002176;Mm01G002378;Mm01G003438;Mm02G003938;Mm02G004039;Mm02G004662;Mm02G005848;Mm02G005856;Mm02G006288;Mm03G006667;Mm03G007170;Mm03G008285;Mm04G008790;Mm04G008930;Mm04G009134;Mm04G009135;Mm04G009866;Mm04G009888;Mm04G009909;Mm04G011232;Mm05G011543;Mm05G012645;Mm05G013358;Mm06G014139;Mm06G014636;Mm06G014643;Mm0…
GO:0006796	phosphate-containing compound metabolic process	183	2162	0.000554625	0.0442565	Mm01G000463;Mm01G000612;Mm01G000619;Mm01G000620;Mm01G000986;Mm01G001106;Mm01G001153;Mm01G001220;Mm01G001445;Mm01G001463;Mm01G001472;Mm01G001474;Mm01G001490;Mm01G001720;Mm01G001726;Mm01G001879;Mm01G001901;Mm01G001959;Mm01G001987;Mm01G002030;Mm01G002303;Mm01G002304;Mm01G002305;Mm01G002306;Mm01G002309;Mm01G002431;Mm01G002717;Mm01G002957;Mm01G003108;Mm01G003313;Mm02G003744;Mm02G004039;Mm02G004262;Mm0…
GO:0009631	cold acclimation	10	44	0.000576009	0.0442957	Mm01G003546;Mm01G003592;Mm05G012054;Mm06G016225;Mm07G018703;Mm08G020143;Mm09G022863;Mm16G036544;Mm18G038497;MmUnG046340
GO:0009620	response to fungus	57	542	0.000585027	0.0442957	Mm01G001463;Mm01G001472;Mm01G003438;Mm02G003938;Mm02G005848;Mm02G005856;Mm02G006288;Mm03G006667;Mm03G008285;Mm04G008790;Mm04G009909;Mm05G011543;Mm05G012645;Mm05G013358;Mm06G014139;Mm06G014636;Mm06G016121;Mm06G016155;Mm07G016470;Mm07G017240;Mm07G019394;Mm08G019998;Mm08G019999;Mm08G020004;Mm08G020716;Mm08G021362;Mm08G021655;Mm09G022226;Mm09G022658;Mm09G022863;Mm10G025034;Mm11G026760;Mm11G026761;Mm1…
GO:0007005	mitochondrion organization	28	214	0.000596294	0.0442957	Mm01G000154;Mm01G001283;Mm01G001817;Mm01G001837;Mm01G002378;Mm01G003660;Mm02G003950;Mm02G004082;Mm02G004133;Mm04G010779;Mm06G014911;Mm09G022128;Mm11G025810;Mm11G026337;Mm12G028150;Mm12G028676;Mm12G028753;Mm12G028842;Mm12G028851;Mm13G029855;Mm13G031168;Mm14G031899;Mm14G032085;Mm14G032251;Mm16G036580;Mm19G040051;Mm19G040064;MmUnG042916
GO:0006884	cell volume homeostasis	4	7	0.000618197	0.0442957	Mm08G019998;Mm08G019999;Mm08G020004;Mm16G036220
GO:0009992	cellular water homeostasis	4	7	0.000618197	0.0442957	Mm08G019998;Mm08G019999;Mm08G020004;Mm16G036220
GO:0009864	induced systemic resistance, jasmonic acid mediated signaling pathway	7	24	0.00079344	0.0457154	Mm01G003438;Mm11G025375;Mm13G031504;Mm14G032821;Mm14G032968;MmUnG042583;MmUnG046263
GO:0070413	trehalose metabolism in response to stress	6	18	0.000866098	0.0596249	Mm04G009726;Mm04G009736;Mm05G013149;Mm07G016361;Mm07G016752;Mm07G018845
GO:0005984	disaccharide metabolic process	13	72	0.000974322	0.0657855	Mm03G008617;Mm04G009726;Mm04G009736;Mm05G013149;Mm05G013579;Mm07G016361;Mm07G016752;Mm07G018700;Mm07G018845;Mm08G019835;Mm11G027108;Mm13G030075;Mm17G037351
GO:0006950	response to stress	317	4050	0.00109037	0.0722316	Mm01G000612;Mm01G000620;Mm01G000775;Mm01G000832;Mm01G000913;Mm01G001138;Mm01G001318;Mm01G001463;Mm01G001472;Mm01G001829;Mm01G001837;Mm01G001946;Mm01G002028;Mm01G002102;Mm01G002176;Mm01G002378;Mm01G003162;Mm01G003281;Mm01G003438;Mm01G003546;Mm01G003560;Mm01G003592;Mm02G003859;Mm02G003938;Mm02G004039;Mm02G004082;Mm02G004133;Mm02G004568;Mm02G004662;Mm02G004697;Mm02G005268;Mm02G005335;Mm02G005354;Mm0…
GO:0009617	response to bacterium	70	717	0.00117316	0.0762771	Mm01G000620;Mm01G000775;Mm01G000832;Mm01G000913;Mm01G001463;Mm01G001472;Mm01G002176;Mm01G002378;Mm01G003438;Mm02G004039;Mm02G006288;Mm04G008790;Mm04G008930;Mm04G009134;Mm04G009135;Mm04G009866;Mm04G009888;Mm05G011543;Mm05G013358;Mm06G014643;Mm06G015712;Mm06G016107;Mm06G016121;Mm07G017401;Mm07G017654;Mm07G017682;Mm08G020698;Mm08G021655;Mm09G022688;Mm09G022704;Mm09G022819;Mm10G024617;Mm11G025358;Mm1…
GO:0005975	carbohydrate metabolic process	69	708	0.00132823	0.0837801	Mm01G002028;Mm01G002431;Mm01G002619;Mm01G002625;Mm01G002627;Mm01G002903;Mm01G003108;Mm01G003560;Mm02G004928;Mm02G005935;Mm03G008617;Mm04G009158;Mm04G009452;Mm04G009590;Mm04G009716;Mm04G009726;Mm04G009736;Mm04G009839;Mm05G012855;Mm05G012861;Mm05G013149;Mm05G013153;Mm05G013579;Mm06G015351;Mm07G016361;Mm07G016752;Mm07G017201;Mm07G018226;Mm07G018700;Mm07G018845;Mm07G018949;Mm07G019154;Mm08G019835;Mm0…
GO:0042752	regulation of circadian rhythm	11	57	0.00133628	0.0837801	Mm02G004568;Mm06G014089;Mm11G027583;Mm11G027600;Mm12G028492;Mm13G031020;Mm16G035189;Mm16G036396;Mm17G037509;MmUnG044386;MmUnG046280
GO:0015711	organic anion transport	37	328	0.00153421	0.0945021	Mm01G001589;Mm02G004974;Mm02G005067;Mm02G005759;Mm03G007066;Mm03G008128;Mm03G008130;Mm05G012466;Mm05G012498;Mm05G013588;Mm05G013602;Mm07G017309;Mm07G019138;Mm08G019412;Mm08G019827;Mm08G020616;Mm08G020619;Mm09G022612;Mm11G026482;Mm12G029507;Mm13G029853;Mm13G030878;Mm14G031823;Mm14G032114;Mm15G034473;Mm16G035128;Mm17G036778;Mm18G038811;Mm18G039510;Mm19G040551;Mm19G040966;Mm19G041280;Mm19G041282;MmU…
GO:0043170	macromolecule metabolic process	580	7894	0.00162956	0.0986446	Mm01G000154;Mm01G000231;Mm01G000274;Mm01G000463;Mm01G000612;Mm01G000619;Mm01G000620;Mm01G000986;Mm01G001057;Mm01G001106;Mm01G001138;Mm01G001153;Mm01G001220;Mm01G001318;Mm01G001346;Mm01G001382;Mm01G001432;Mm01G001445;Mm01G001463;Mm01G001472;Mm01G001474;Mm01G001484;Mm01G001490;Mm01G001499;Mm01G001674;Mm01G001720;Mm01G001726;Mm01G001740;Mm01G001817;Mm01G001818;Mm01G001829;Mm01G001854;Mm01G001862;Mm0…
GO:0005983	starch catabolic process	7	27	0.00170314	0.101351	Mm01G003108;Mm02G005935;Mm05G012855;Mm05G013579;Mm09G022863;Mm17G037351;MmUnG041854
GO:0044723	single-organism carbohydrate metabolic process	58	581	0.00182466	0.105704	Mm01G002028;Mm01G002431;Mm01G002619;Mm01G002625;Mm01G003560;Mm02G004928;Mm03G008617;Mm04G009158;Mm04G009452;Mm04G009716;Mm04G009726;Mm04G009736;Mm04G009839;Mm05G012861;Mm05G013149;Mm05G013153;Mm05G013579;Mm06G015351;Mm07G016361;Mm07G016752;Mm07G018226;Mm07G018700;Mm07G018845;Mm07G018949;Mm07G019154;Mm08G019835;Mm08G019998;Mm08G019999;Mm08G020004;Mm08G020226;Mm10G024791;Mm11G025602;Mm11G025662;Mm1…
GO:0006139	nucleobase-containing compound metabolic process	371	4851	0.00183649	0.105704	Mm01G000154;Mm01G000231;Mm01G000274;Mm01G000612;Mm01G001057;Mm01G001138;Mm01G001153;Mm01G001346;Mm01G001382;Mm01G001431;Mm01G001432;Mm01G001463;Mm01G001472;Mm01G001484;Mm01G001499;Mm01G001674;Mm01G001740;Mm01G001817;Mm01G001818;Mm01G001829;Mm01G001854;Mm01G001862;Mm01G001890;Mm01G002105;Mm01G002243;Mm01G002377;Mm01G002627;Mm01G002629;Mm01G002675;Mm01G002717;Mm01G002848;Mm01G002930;Mm01G002957;Mm0…
GO:0098542	defense response to other organism	100	1113	0.0019117	0.108258	Mm01G000620;Mm01G000775;Mm01G002176;Mm01G003438;Mm02G003938;Mm02G004039;Mm02G004662;Mm02G005848;Mm02G005856;Mm02G006288;Mm03G008285;Mm04G008930;Mm04G009134;Mm04G009135;Mm04G009866;Mm04G009888;Mm04G009909;Mm04G011232;Mm05G011543;Mm05G012645;Mm05G013358;Mm06G014139;Mm06G014636;Mm06G014643;Mm06G016107;Mm06G016121;Mm06G016155;Mm07G016470;Mm07G017240;Mm07G017401;Mm07G018847;Mm08G019998;Mm08G019999;Mm0…
GO:0015853	adenine transport	4	9	0.00199379	0.109378	Mm01G003425;Mm02G005700;MmUnG043657;MmUnG045880
GO:0015854	guanine transport	4	9	0.00199379	0.109378	Mm01G003425;Mm02G005700;MmUnG043657;MmUnG045880
GO:0010286	heat acclimation	12	69	0.00210462	0.112145	Mm02G003938;Mm02G005742;Mm04G009392;Mm04G009492;Mm06G016121;Mm07G018491;Mm08G020784;Mm12G028494;Mm13G031123;Mm14G031781;Mm18G038744;MmUnG041596
GO:1900056	negative regulation of leaf senescence	6	21	0.00212498	0.112145	Mm01G003438;Mm03G008617;Mm13G031504;Mm14G032821;Mm14G032968;MmUnG042583
GO:0006360	transcription from RNA polymerase I promoter	7	28	0.00214005	0.112145	Mm04G009951;Mm07G018931;Mm12G028424;Mm13G030932;MmUnG043328;MmUnG045396;MmUnG045986
GO:0050832	defense response to fungus	45	430	0.00233996	0.119107	Mm01G003438;Mm02G003938;Mm02G005848;Mm02G005856;Mm02G006288;Mm03G008285;Mm04G009909;Mm05G011543;Mm05G012645;Mm05G013358;Mm06G014139;Mm06G014636;Mm06G016121;Mm06G016155;Mm07G016470;Mm07G017240;Mm08G019998;Mm08G019999;Mm08G020004;Mm08G020716;Mm08G021362;Mm08G021655;Mm09G022226;Mm09G022658;Mm10G025034;Mm11G026760;Mm11G026761;Mm11G026762;Mm12G029243;Mm13G031104;Mm13G031123;Mm13G031504;Mm14G032227;Mm1…
GO:0010501	RNA secondary structure unwinding	13	79	0.00234074	0.119107	Mm01G001057;Mm01G001818;Mm03G008528;Mm05G012054;Mm07G019078;Mm08G019678;Mm09G022080;Mm11G026491;Mm11G026586;Mm12G027708;Mm14G032704;Mm16G036413;Mm17G036690
GO:0042542	response to hydrogen peroxide	23	181	0.00258982	0.129898	Mm01G001138;Mm01G003281;Mm02G005361;Mm04G009134;Mm04G009135;Mm04G009392;Mm04G009492;Mm06G015712;Mm06G015832;Mm07G017480;Mm07G017654;Mm07G017682;Mm08G020143;Mm11G026624;Mm11G027583;Mm11G027600;Mm12G028226;Mm12G028494;Mm16G035189;Mm18G039154;Mm19G040917;MmUnG043360;MmUnG045156
GO:0006891	intra-Golgi vesicle-mediated transport	7	29	0.00265867	0.131473	Mm02G004959;Mm02G004960;Mm02G005075;Mm02G005077;Mm04G009672;Mm17G036760;MmUnG046024
GO:0010522	regulation of calcium ion transport into cytosol	3	5	0.00278552	0.132162	Mm06G015832;Mm06G015873;Mm16G036446
GO:0031120	snRNA pseudouridine synthesis	3	5	0.00278552	0.132162	Mm01G002629;Mm14G032473;MmUnG042541
GO:0051279	regulation of release of sequestered calcium ion into cytosol	3	5	0.00278552	0.132162	Mm06G015832;Mm06G015873;Mm16G036446
GO:0009682	induced systemic resistance	9	46	0.00325475	0.150999	Mm01G003438;Mm11G025375;Mm13G031504;Mm14G032821;Mm14G032968;Mm19G040123;MmUnG042583;MmUnG043643;MmUnG046263
GO:0034620	cellular response to unfolded protein	7	30	0.00326855	0.150999	Mm04G009392;Mm04G009492;Mm05G013588;Mm05G013602;Mm12G028494;Mm12G029054;Mm12G029060
GO:0046351	disaccharide biosynthetic process	8	38	0.00337984	0.154112	Mm03G008617;Mm04G009726;Mm04G009736;Mm05G013149;Mm07G016361;Mm07G016752;Mm07G018845;Mm11G027108
GO:0010035	response to inorganic substance	127	1492	0.00349173	0.157173	Mm01G001138;Mm01G001318;Mm01G001837;Mm01G002176;Mm01G003281;Mm01G003546;Mm01G003560;Mm01G003592;Mm02G004082;Mm02G004133;Mm02G004568;Mm02G005361;Mm03G006505;Mm03G006950;Mm03G007170;Mm04G009114;Mm04G009134;Mm04G009135;Mm04G009392;Mm04G009492;Mm04G009816;Mm04G010003;Mm05G012054;Mm05G012618;Mm05G012855;Mm05G012959;Mm06G014068;Mm06G014487;Mm06G014643;Mm06G015046;Mm06G015051;Mm06G015623;Mm06G015712;Mm0…
GO:1901700	response to oxygen-containing compound	202	2512	0.00355368	0.157936	Mm01G000619;Mm01G000620;Mm01G001138;Mm01G001318;Mm01G001369;Mm01G001463;Mm01G001472;Mm01G001837;Mm01G002102;Mm01G002176;Mm01G002373;Mm01G002378;Mm01G003281;Mm01G003438;Mm01G003546;Mm01G003560;Mm01G003592;Mm02G003938;Mm02G004048;Mm02G004055;Mm02G004240;Mm02G004262;Mm02G004568;Mm02G004697;Mm02G004928;Mm02G005022;Mm02G005335;Mm02G005361;Mm02G005742;Mm02G005975;Mm02G006288;Mm03G006505;Mm03G006667;Mm0…
GO:0009605	response to external stimulus	175	2146	0.00389179	0.170801	Mm01G000443;Mm01G000612;Mm01G000620;Mm01G000775;Mm01G000832;Mm01G000913;Mm01G001463;Mm01G001472;Mm01G001854;Mm01G002176;Mm01G002378;Mm01G002711;Mm01G003438;Mm01G003560;Mm02G003796;Mm02G003938;Mm02G004039;Mm02G004662;Mm02G004697;Mm02G005335;Mm02G005760;Mm02G005848;Mm02G005856;Mm02G006288;Mm03G006667;Mm03G007145;Mm03G007170;Mm03G007350;Mm03G008251;Mm03G008285;Mm04G008790;Mm04G008930;Mm04G009134;Mm0…
GO:0072350	tricarboxylic acid metabolic process	7	31	0.00397958	0.172497	Mm04G009816;Mm07G018703;Mm12G029280;Mm16G035357;Mm18G039163;Mm19G040452;MmUnG045097
GO:0039694	viral RNA genome replication	2	2	0.00457461	0.182517	Mm09G022080;Mm11G026491
GO:0039703	RNA replication	2	2	0.00457461	0.182517	Mm09G022080;Mm11G026491
GO:0044788	modulation by host of viral process	2	2	0.00457461	0.182517	Mm14G033223;MmUnG046009
GO:0044794	positive regulation by host of viral process	2	2	0.00457461	0.182517	Mm14G033223;MmUnG046009
GO:0051572	negative regulation of histone H3-K4 methylation	2	2	0.00457461	0.182517	Mm18G039051;Mm18G039057
GO:0071465	cellular response to desiccation	2	2	0.00457461	0.182517	Mm01G003560;Mm08G020226
GO:0097359	UDP-glucosylation	2	2	0.00457461	0.182517	Mm12G029054;Mm12G029060
GO:1990481	mRNA pseudouridine synthesis	4	11	0.00468073	0.184652	Mm01G000154;Mm01G002629;Mm14G032473;MmUnG042541
GO:0031347	regulation of defense response	43	423	0.0048891	0.190729	Mm01G003438;Mm02G003938;Mm02G004039;Mm02G005354;Mm02G005371;Mm02G005848;Mm02G005856;Mm02G006288;Mm04G009134;Mm04G009135;Mm05G011543;Mm05G013358;Mm06G015812;Mm06G016107;Mm07G019037;Mm08G021655;Mm10G024617;Mm11G025375;Mm11G025776;Mm11G027473;Mm11G027477;Mm12G028226;Mm12G028264;Mm12G029054;Mm12G029060;Mm13G031504;Mm14G032227;Mm14G032821;Mm14G032968;Mm16G035451;Mm17G037061;Mm17G038062;Mm18G039051;Mm1…
GO:0017062	respiratory chain complex III assembly	3	6	0.00529107	0.199752	Mm01G002378;Mm02G003950;Mm14G032251
GO:0034551	mitochondrial respiratory chain complex III assembly	3	6	0.00529107	0.199752	Mm01G002378;Mm02G003950;Mm14G032251
GO:0097033	mitochondrial respiratory chain complex III biogenesis	3	6	0.00529107	0.199752	Mm01G002378;Mm02G003950;Mm14G032251
GO:0006813	potassium ion transport	18	138	0.00547739	0.203942	Mm01G000443;Mm01G001946;Mm02G004048;Mm02G004055;Mm04G008790;Mm04G008795;Mm04G009349;Mm04G009657;Mm06G015873;Mm07G017838;Mm10G025057;Mm12G029210;Mm14G032807;Mm14G033555;Mm17G037647;MmUnG043376;MmUnG043382;MmUnG044966
GO:0030855	epithelial cell differentiation	8	41	0.00551822	0.203942	Mm01G002930;Mm01G003113;Mm17G036706;Mm18G039716;Mm19G040682;MmUnG041859;MmUnG045922;MmUnG046010
GO:0009414	response to water deprivation	52	537	0.00564432	0.206429	Mm01G001318;Mm01G002176;Mm01G003546;Mm01G003560;Mm01G003592;Mm03G006505;Mm04G010003;Mm05G012054;Mm05G012855;Mm05G012959;Mm06G014487;Mm06G015046;Mm06G015051;Mm06G015623;Mm06G015841;Mm06G016121;Mm07G018226;Mm07G018237;Mm07G018700;Mm08G020086;Mm08G020226;Mm09G022080;Mm09G022819;Mm09G023354;Mm10G024748;Mm10G025057;Mm11G026491;Mm11G027133;Mm13G031123;Mm13G031374;Mm14G032085;Mm14G033093;Mm14G033462;Mm1…
GO:0050896	response to stimulus	520	7101	0.00575225	0.208208	Mm01G000443;Mm01G000612;Mm01G000619;Mm01G000620;Mm01G000775;Mm01G000832;Mm01G000913;Mm01G000986;Mm01G001106;Mm01G001138;Mm01G001153;Mm01G001220;Mm01G001318;Mm01G001369;Mm01G001432;Mm01G001445;Mm01G001463;Mm01G001472;Mm01G001474;Mm01G001490;Mm01G001589;Mm01G001674;Mm01G001829;Mm01G001837;Mm01G001854;Mm01G001890;Mm01G001901;Mm01G001946;Mm01G001959;Mm01G001987;Mm01G002028;Mm01G002030;Mm01G002102;Mm0…
GO:0055086	nucleobase-containing small molecule metabolic process	43	429	0.00625297	0.224022	Mm01G001431;Mm01G001463;Mm01G001472;Mm01G002627;Mm01G002717;Mm01G002957;Mm02G003744;Mm02G003796;Mm02G004473;Mm02G004928;Mm02G005321;Mm03G006888;Mm04G009452;Mm04G009546;Mm04G009716;Mm04G010064;Mm06G015411;Mm07G016579;Mm07G016630;Mm08G019669;Mm08G020743;Mm09G023196;Mm11G025987;Mm11G027349;Mm12G028604;Mm12G028741;Mm12G028742;Mm12G029054;Mm12G029060;Mm13G030794;Mm14G033093;Mm15G033964;Mm15G034679;Mm1…
GO:0006986	response to unfolded protein	8	42	0.00642145	0.227734	Mm04G009053;Mm04G009392;Mm04G009492;Mm05G013588;Mm05G013602;Mm12G028494;Mm12G029054;Mm12G029060
GO:0018108	peptidyl-tyrosine phosphorylation	4	12	0.00664879	0.231128	Mm02G005354;Mm02G005371;Mm05G013624;Mm19G041066
GO:0018212	peptidyl-tyrosine modification	4	12	0.00664879	0.231128	Mm02G005354;Mm02G005371;Mm05G013624;Mm19G041066
GO:0009415	response to water	52	543	0.00699092	0.2379	Mm01G001318;Mm01G002176;Mm01G003546;Mm01G003560;Mm01G003592;Mm03G006505;Mm04G010003;Mm05G012054;Mm05G012855;Mm05G012959;Mm06G014487;Mm06G015046;Mm06G015051;Mm06G015623;Mm06G015841;Mm06G016121;Mm07G018226;Mm07G018237;Mm07G018700;Mm08G020086;Mm08G020226;Mm09G022080;Mm09G022819;Mm09G023354;Mm10G024748;Mm10G025057;Mm11G026491;Mm11G027133;Mm13G031123;Mm13G031374;Mm14G032085;Mm14G033093;Mm14G033462;Mm1…
GO:0090304	nucleic acid metabolic process	338	4472	0.00704062	0.2379	Mm01G000154;Mm01G000231;Mm01G000274;Mm01G000612;Mm01G001057;Mm01G001138;Mm01G001153;Mm01G001346;Mm01G001382;Mm01G001432;Mm01G001484;Mm01G001499;Mm01G001674;Mm01G001740;Mm01G001817;Mm01G001818;Mm01G001829;Mm01G001854;Mm01G001862;Mm01G001890;Mm01G002105;Mm01G002243;Mm01G002377;Mm01G002629;Mm01G002675;Mm01G002848;Mm01G002930;Mm01G003183;Mm01G003438;Mm01G003446;Mm01G003477;Mm01G003546;Mm01G003592;Mm0…
GO:0008643	carbohydrate transport	15	110	0.00714097	0.2379	Mm03G008128;Mm03G008130;Mm04G009094;Mm05G013588;Mm05G013602;Mm07G019138;Mm07G019324;Mm08G021629;Mm10G024748;Mm11G025776;Mm12G029137;Mm13G030039;Mm16G035376;Mm18G038806;MmUnG044154
GO:0071804	cellular potassium ion transport	17	131	0.00718241	0.2379	Mm01G000443;Mm02G004048;Mm02G004055;Mm04G008790;Mm04G008795;Mm04G009349;Mm04G009657;Mm06G015873;Mm07G017838;Mm10G025057;Mm12G029210;Mm14G032807;Mm14G033555;Mm17G037647;MmUnG043376;MmUnG043382;MmUnG044966
GO:0071805	potassium ion transmembrane transport	17	131	0.00718241	0.2379	Mm01G000443;Mm02G004048;Mm02G004055;Mm04G008790;Mm04G008795;Mm04G009349;Mm04G009657;Mm06G015873;Mm07G017838;Mm10G025057;Mm12G029210;Mm14G032807;Mm14G033555;Mm17G037647;MmUnG043376;MmUnG043382;MmUnG044966
GO:0046686	response to cadmium ion	49	507	0.00733459	0.240671	Mm01G002176;Mm01G003281;Mm02G004082;Mm02G004133;Mm02G004568;Mm03G006950;Mm04G009114;Mm04G009816;Mm06G014068;Mm06G014643;Mm06G015712;Mm06G015887;Mm07G018226;Mm08G019835;Mm08G020086;Mm08G021642;Mm09G023622;Mm11G025439;Mm11G025513;Mm11G025626;Mm11G026206;Mm11G026753;Mm11G027108;Mm12G029046;Mm13G029855;Mm14G031823;Mm14G032333;Mm16G035519;Mm16G036580;Mm17G036675;Mm17G037483;Mm18G039652;Mm19G040227;Mm1…
GO:0044247	cellular polysaccharide catabolic process	8	43	0.00743236	0.24162	Mm01G003108;Mm02G005935;Mm05G012855;Mm05G013579;Mm07G018226;Mm09G022863;Mm17G037351;MmUnG041854
GO:0071702	organic substance transport	100	1166	0.00752993	0.242547	Mm01G001369;Mm01G001589;Mm01G001899;Mm01G003425;Mm02G004082;Mm02G004133;Mm02G004262;Mm02G004959;Mm02G004960;Mm02G004974;Mm02G005067;Mm02G005075;Mm02G005077;Mm02G005411;Mm02G005700;Mm02G005759;Mm03G006808;Mm03G007066;Mm03G008128;Mm03G008130;Mm03G008461;Mm04G009094;Mm04G009631;Mm04G010171;Mm04G010398;Mm04G010691;Mm04G010704;Mm05G012458;Mm05G012466;Mm05G012489;Mm05G012498;Mm05G012648;Mm05G012781;Mm0…
GO:0009862	systemic acquired resistance, salicylic acid mediated signaling pathway	6	27	0.00818634	0.261293	Mm01G003438;Mm13G031504;Mm14G032821;Mm14G032968;MmUnG042583;MmUnG043085
GO:0009312	oligosaccharide biosynthetic process	9	53	0.00857692	0.271293	Mm03G008617;Mm04G009726;Mm04G009736;Mm05G013149;Mm07G016361;Mm07G016752;Mm07G018845;Mm11G027108;MmUnG045406
GO:0042742	defense response to bacterium	55	587	0.00866776	0.271719	Mm01G000620;Mm01G000775;Mm01G002176;Mm01G003438;Mm02G004039;Mm02G006288;Mm04G008930;Mm04G009134;Mm04G009135;Mm04G009866;Mm04G009888;Mm05G011543;Mm05G013358;Mm06G014643;Mm06G016107;Mm06G016121;Mm07G017401;Mm08G020698;Mm08G021655;Mm09G022688;Mm09G022704;Mm09G022819;Mm10G024617;Mm11G025358;Mm11G025375;Mm11G026864;Mm11G027133;Mm11G027473;Mm11G027477;Mm12G028226;Mm13G031048;Mm13G031062;Mm13G031123;Mm1…
GO:0090279	regulation of calcium ion import	3	7	0.00879573	0.27329	Mm06G015832;Mm06G015873;Mm16G036446
GO:0010118	stomatal movement	28	258	0.00903617	0.278298	Mm02G005022;Mm03G007145;Mm03G007350;Mm04G009349;Mm05G012618;Mm06G014089;Mm06G015343;Mm06G015841;Mm07G018237;Mm08G020734;Mm10G025057;Mm11G025987;Mm11G026760;Mm11G026761;Mm11G026762;Mm11G027129;Mm13G031020;Mm17G037509;Mm17G037550;Mm17G037647;Mm18G039652;Mm19G040966;MmUnG041650;MmUnG044386;MmUnG044966;MmUnG045653;MmUnG045654;MmUnG046160
GO:0010082	regulation of root meristem growth	7	36	0.00941179	0.285168	Mm06G014089;Mm06G015343;Mm09G023354;Mm13G031020;Mm14G032996;Mm17G037509;MmUnG044386
GO:0071446	cellular response to salicylic acid stimulus	14	103	0.00942168	0.285168	Mm01G002378;Mm01G003438;Mm05G013358;Mm12G028264;Mm13G031504;Mm14G032251;Mm14G032821;Mm14G032968;Mm15G034997;Mm19G040227;MmUnG042483;MmUnG042583;MmUnG043085;MmUnG045977
GO:0071236	cellular response to antibiotic	13	93	0.00964017	0.287558	Mm01G002378;Mm01G003438;Mm05G013358;Mm12G028264;Mm13G031504;Mm14G032251;Mm14G032821;Mm14G032968;Mm15G034997;Mm18G039154;MmUnG042483;MmUnG042583;MmUnG043085
GO:0051704	multi-organism process	166	2072	0.00966442	0.287558	Mm01G000443;Mm01G000620;Mm01G000775;Mm01G000832;Mm01G000913;Mm01G001432;Mm01G001463;Mm01G001472;Mm01G002176;Mm01G002378;Mm01G002619;Mm01G002625;Mm01G003113;Mm01G003438;Mm02G003938;Mm02G004039;Mm02G004662;Mm02G005848;Mm02G005856;Mm02G006288;Mm03G006505;Mm03G006667;Mm03G007170;Mm03G007237;Mm03G008285;Mm04G008790;Mm04G008930;Mm04G009134;Mm04G009135;Mm04G009866;Mm04G009888;Mm04G009909;Mm04G009950;Mm0…
GO:0009636	response to toxic substance	64	707	0.0102064	0.300268	Mm01G001138;Mm01G001463;Mm01G001472;Mm01G002176;Mm01G002378;Mm01G003281;Mm01G003438;Mm02G004568;Mm02G005361;Mm04G009134;Mm04G009135;Mm04G009392;Mm04G009492;Mm05G013358;Mm06G014068;Mm06G015712;Mm06G015832;Mm07G017480;Mm07G017654;Mm07G017682;Mm08G019453;Mm08G019998;Mm08G019999;Mm08G020004;Mm08G020143;Mm08G020159;Mm08G020826;Mm08G021655;Mm11G026259;Mm11G026624;Mm11G027583;Mm11G027600;Mm12G028226;Mm1…
GO:0000272	polysaccharide catabolic process	10	64	0.0103446	0.300268	Mm01G002903;Mm01G003108;Mm02G005935;Mm05G012855;Mm05G013579;Mm07G018226;Mm09G022863;Mm10G024760;Mm17G037351;MmUnG041854
GO:0009553	embryo sac development	20	169	0.0103482	0.300268	Mm01G001138;Mm01G001382;Mm01G001431;Mm01G003383;Mm02G005022;Mm02G005361;Mm03G006667;Mm05G013588;Mm05G013602;Mm07G018931;Mm07G019037;Mm08G020698;Mm11G026018;Mm11G027001;Mm12G027690;Mm12G027798;Mm14G031637;Mm18G039408;Mm19G041397;Mm19G041401
GO:0045088	regulation of innate immune response	23	204	0.0110426	0.317791	Mm01G003438;Mm02G005848;Mm02G005856;Mm05G013358;Mm06G015812;Mm07G019037;Mm10G024617;Mm11G025375;Mm12G028264;Mm12G029054;Mm12G029060;Mm13G031504;Mm14G032821;Mm14G032968;Mm17G037061;Mm17G038062;Mm18G039051;Mm18G039057;Mm19G041016;MmUnG042483;MmUnG042583;MmUnG043129;MmUnG046263
GO:0046835	carbohydrate phosphorylation	8	46	0.0111871	0.319334	Mm01G002431;Mm02G004928;Mm04G009452;Mm11G025987;Mm15G033600;Mm15G033611;Mm16G035587;Mm18G039413
GO:0009863	salicylic acid mediated signaling pathway	13	95	0.0114524	0.32427	Mm01G002378;Mm01G003438;Mm05G013358;Mm12G028264;Mm13G031504;Mm14G032251;Mm14G032821;Mm14G032968;Mm19G040227;MmUnG042483;MmUnG042583;MmUnG043085;MmUnG045977
GO:0031118	rRNA pseudouridine synthesis	4	14	0.0120624	0.332276	Mm01G002629;Mm09G022324;Mm14G032473;MmUnG042541
GO:0045489	pectin biosynthetic process	7	38	0.0126554	0.332276	Mm01G002619;Mm01G002625;Mm10G024791;Mm12G028264;Mm14G032476;Mm16G035156;MmUnG042483
GO:0006997	nucleus organization	10	66	0.0127635	0.332276	Mm01G001432;Mm01G002572;Mm03G006667;Mm04G010461;Mm04G010487;Mm06G014587;Mm09G023019;Mm11G027001;Mm14G031637;MmUnG041817
GO:0080050	regulation of seed development	11	76	0.0129009	0.332276	Mm03G007377;Mm06G014089;Mm06G015343;Mm07G018237;Mm07G018726;Mm09G023354;Mm13G031020;Mm14G032996;Mm16G036446;Mm17G037509;MmUnG044386
GO:0006188	IMP biosynthetic process	2	3	0.0131059	0.332276	Mm02G004473;Mm13G030794
GO:0006189	'de novo' IMP biosynthetic process	2	3	0.0131059	0.332276	Mm02G004473;Mm13G030794
GO:0006471	protein ADP-ribosylation	2	3	0.0131059	0.332276	Mm04G009716;MmUnG042205
GO:0008286	insulin receptor signaling pathway	2	3	0.0131059	0.332276	Mm02G004262;Mm13G031139
GO:0033233	regulation of protein sumoylation	2	3	0.0131059	0.332276	Mm08G019755;Mm16G036446
GO:0033234	negative regulation of protein sumoylation	2	3	0.0131059	0.332276	Mm08G019755;Mm16G036446
GO:0035280	miRNA loading onto RISC involved in gene silencing by miRNA	2	3	0.0131059	0.332276	Mm10G024805;MmUnG043444
GO:0042790	transcription of nuclear large rRNA transcript from RNA polymerase I promoter	2	3	0.0131059	0.332276	Mm04G009951;Mm12G028424
GO:0052746	inositol phosphorylation	2	3	0.0131059	0.332276	Mm16G035587;Mm18G039413
GO:0070922	small RNA loading onto RISC	2	3	0.0131059	0.332276	Mm10G024805;MmUnG043444
GO:0016233	telomere capping	3	8	0.0133711	0.332276	Mm04G009716;Mm16G036539;MmUnG043011
GO:0040031	snRNA modification	3	8	0.0133711	0.332276	Mm01G002629;Mm14G032473;MmUnG042541
GO:1903169	regulation of calcium ion transmembrane transport	3	8	0.0133711	0.332276	Mm06G015832;Mm06G015873;Mm16G036446
GO:0010119	regulation of stomatal movement	16	129	0.0135134	0.332276	Mm02G005022;Mm03G007145;Mm03G007350;Mm04G009349;Mm05G012618;Mm06G014089;Mm06G015343;Mm13G031020;Mm17G037509;Mm17G037550;Mm17G037647;Mm18G039652;Mm19G040966;MmUnG041650;MmUnG044386;MmUnG044966
GO:0055085	transmembrane transport	110	1327	0.0137385	0.332276	Mm01G000443;Mm01G001589;Mm01G003425;Mm02G004048;Mm02G004055;Mm02G004082;Mm02G004133;Mm02G004974;Mm02G005067;Mm02G005411;Mm02G005700;Mm02G005759;Mm02G006026;Mm02G006308;Mm03G007066;Mm03G007170;Mm03G007350;Mm03G008128;Mm03G008130;Mm03G008461;Mm04G008790;Mm04G008795;Mm04G008907;Mm04G009094;Mm04G009242;Mm04G009349;Mm04G009439;Mm04G009657;Mm05G012466;Mm05G012498;Mm05G012618;Mm05G012781;Mm05G013505;Mm0…
GO:0001522	pseudouridine synthesis	6	30	0.0138172	0.332276	Mm01G000154;Mm01G002629;Mm04G009981;Mm09G022324;Mm14G032473;MmUnG042541
GO:0006101	citrate metabolic process	6	30	0.0138172	0.332276	Mm04G009816;Mm07G018703;Mm12G029280;Mm18G039163;Mm19G040452;MmUnG045097
GO:0045332	phospholipid translocation	6	30	0.0138172	0.332276	Mm08G019412;Mm08G019827;Mm09G022612;Mm13G029853;MmUnG042654;MmUnG045114
GO:0017004	cytochrome complex assembly	5	22	0.0140624	0.335871	Mm01G002378;Mm02G003950;Mm03G006547;Mm12G028676;Mm14G032251
GO:0010150	leaf senescence	23	209	0.0144684	0.340931	Mm01G003438;Mm03G006945;Mm03G007220;Mm03G008617;Mm04G009134;Mm04G009135;Mm05G011543;Mm05G013358;Mm06G014089;Mm06G015343;Mm07G018237;Mm07G019118;Mm09G022819;Mm10G024785;Mm12G028226;Mm13G031020;Mm13G031504;Mm14G032821;Mm14G032968;Mm17G037509;MmUnG042583;MmUnG044386;MmUnG045156
GO:0010260	organ senescence	23	209	0.0144684	0.340931	Mm01G003438;Mm03G006945;Mm03G007220;Mm03G008617;Mm04G009134;Mm04G009135;Mm05G011543;Mm05G013358;Mm06G014089;Mm06G015343;Mm07G018237;Mm07G019118;Mm09G022819;Mm10G024785;Mm12G028226;Mm13G031020;Mm13G031504;Mm14G032821;Mm14G032968;Mm17G037509;MmUnG042583;MmUnG044386;MmUnG045156
GO:0034219	carbohydrate transmembrane transport	13	98	0.0146525	0.342967	Mm03G008128;Mm03G008130;Mm04G009094;Mm05G013588;Mm05G013602;Mm07G019138;Mm07G019324;Mm08G021629;Mm12G029137;Mm13G030039;Mm16G035376;Mm18G038806;MmUnG044154
GO:0010075	regulation of meristem growth	11	78	0.0155105	0.359792	Mm01G002930;Mm06G014089;Mm06G015343;Mm08G020086;Mm09G023354;Mm13G031020;Mm14G032996;Mm17G037509;Mm18G039484;MmUnG044386;MmUnG046010
GO:0015867	ATP transport	4	15	0.0155834	0.359792	Mm01G001589;Mm02G004974;Mm02G005067;Mm19G041280
GO:0080134	regulation of response to stress	55	606	0.0156788	0.359792	Mm01G000612;Mm01G003438;Mm02G003938;Mm02G004039;Mm02G005268;Mm02G005354;Mm02G005371;Mm02G005848;Mm02G005856;Mm02G006288;Mm04G009134;Mm04G009135;Mm04G009308;Mm05G011543;Mm05G013358;Mm06G014487;Mm06G015812;Mm06G016107;Mm07G019037;Mm08G021655;Mm10G024617;Mm11G025375;Mm11G025776;Mm11G025997;Mm11G027473;Mm11G027477;Mm12G028226;Mm12G028264;Mm12G029054;Mm12G029060;Mm13G031504;Mm14G032085;Mm14G032227;Mm1…
GO:0034204	lipid translocation	6	31	0.0161783	0.366464	Mm08G019412;Mm08G019827;Mm09G022612;Mm13G029853;MmUnG042654;MmUnG045114
GO:0097035	regulation of membrane lipid distribution	6	31	0.0161783	0.366464	Mm08G019412;Mm08G019827;Mm09G022612;Mm13G029853;MmUnG042654;MmUnG045114
GO:0000963	mitochondrial RNA processing	5	23	0.0169911	0.379973	Mm01G000154;Mm01G001817;Mm04G010779;Mm14G032085;MmUnG042916
GO:1900865	chloroplast RNA modification	5	23	0.0169911	0.379973	Mm09G022397;Mm09G022426;Mm11G026308;Mm12G027938;Mm12G029273
GO:0000302	response to reactive oxygen species	32	320	0.0172036	0.382289	Mm01G001138;Mm01G001837;Mm01G003281;Mm02G005361;Mm04G009134;Mm04G009135;Mm04G009392;Mm04G009492;Mm06G015712;Mm06G015832;Mm07G017480;Mm07G017654;Mm07G017682;Mm07G019394;Mm08G019453;Mm08G020143;Mm08G020159;Mm08G020826;Mm11G026624;Mm11G027583;Mm11G027600;Mm12G028226;Mm12G028494;Mm13G030562;Mm14G033093;Mm16G035189;Mm18G039154;Mm19G040917;Mm19G041282;MmUnG043360;MmUnG045156;MmUnG045840
GO:0034641	cellular nitrogen compound metabolic process	406	5531	0.0182652	0.389571	Mm01G000154;Mm01G000231;Mm01G000274;Mm01G000322;Mm01G000612;Mm01G001057;Mm01G001138;Mm01G001153;Mm01G001346;Mm01G001382;Mm01G001431;Mm01G001432;Mm01G001463;Mm01G001472;Mm01G001484;Mm01G001499;Mm01G001589;Mm01G001674;Mm01G001740;Mm01G001817;Mm01G001818;Mm01G001829;Mm01G001854;Mm01G001862;Mm01G001890;Mm01G002102;Mm01G002105;Mm01G002176;Mm01G002243;Mm01G002377;Mm01G002627;Mm01G002629;Mm01G002675;Mm0…
GO:0046483	heterocycle metabolic process	384	5214	0.0187524	0.389571	Mm01G000154;Mm01G000231;Mm01G000274;Mm01G000322;Mm01G000612;Mm01G001057;Mm01G001138;Mm01G001153;Mm01G001346;Mm01G001382;Mm01G001431;Mm01G001432;Mm01G001463;Mm01G001472;Mm01G001484;Mm01G001499;Mm01G001589;Mm01G001674;Mm01G001740;Mm01G001817;Mm01G001818;Mm01G001829;Mm01G001854;Mm01G001862;Mm01G001890;Mm01G002105;Mm01G002243;Mm01G002377;Mm01G002627;Mm01G002629;Mm01G002675;Mm01G002717;Mm01G002848;Mm0…
GO:0071417	cellular response to organonitrogen compound	10	70	0.0188442	0.389571	Mm01G001369;Mm01G001854;Mm02G004048;Mm02G004055;Mm02G004262;Mm02G004697;Mm06G015832;Mm07G017838;Mm13G031139;MmUnG043500
GO:0007472	wing disc morphogenesis	3	9	0.0190597	0.389571	Mm01G003113;Mm19G040682;MmUnG041859
GO:0007476	imaginal disc-derived wing morphogenesis	3	9	0.0190597	0.389571	Mm01G003113;Mm19G040682;MmUnG041859
GO:0007560	imaginal disc morphogenesis	3	9	0.0190597	0.389571	Mm01G003113;Mm19G040682;MmUnG041859
GO:0035114	imaginal disc-derived appendage morphogenesis	3	9	0.0190597	0.389571	Mm01G003113;Mm19G040682;MmUnG041859
GO:0035120	post-embryonic appendage morphogenesis	3	9	0.0190597	0.389571	Mm01G003113;Mm19G040682;MmUnG041859
GO:0035220	wing disc development	3	9	0.0190597	0.389571	Mm01G003113;Mm19G040682;MmUnG041859
GO:0048737	imaginal disc-derived appendage development	3	9	0.0190597	0.389571	Mm01G003113;Mm19G040682;MmUnG041859
GO:0031349	positive regulation of defense response	19	168	0.01906	0.389571	Mm01G003438;Mm02G005354;Mm02G005371;Mm02G005848;Mm02G005856;Mm05G011543;Mm05G013358;Mm06G015812;Mm07G019037;Mm10G024617;Mm11G025375;Mm12G029054;Mm12G029060;Mm13G031504;Mm14G032821;Mm14G032968;Mm19G041066;MmUnG042583;MmUnG046263
GO:0048229	gametophyte development	47	511	0.0195735	0.389571	Mm01G000612;Mm01G001138;Mm01G001382;Mm01G001431;Mm01G002619;Mm01G002625;Mm01G003383;Mm02G004021;Mm02G005022;Mm02G005361;Mm03G006505;Mm03G006667;Mm03G008591;Mm04G009673;Mm04G010289;Mm05G013358;Mm05G013489;Mm05G013588;Mm05G013602;Mm06G015844;Mm07G018468;Mm07G018931;Mm07G019037;Mm08G019441;Mm08G020698;Mm08G020743;Mm11G026018;Mm11G027001;Mm11G027133;Mm11G027349;Mm12G027690;Mm12G027798;Mm12G029486;Mm1…
GO:0018196	peptidyl-asparagine modification	4	16	0.0196876	0.389571	Mm11G025997;Mm12G029054;Mm12G029060;MmUnG042136
GO:0018279	protein N-linked glycosylation via asparagine	4	16	0.0196876	0.389571	Mm11G025997;Mm12G029054;Mm12G029060;MmUnG042136
GO:0070370	cellular heat acclimation	4	16	0.0196876	0.389571	Mm06G016121;Mm07G018491;Mm13G031123;MmUnG041596
GO:0002682	regulation of immune system process	27	263	0.0199999	0.389571	Mm01G003113;Mm01G003438;Mm02G005848;Mm02G005856;Mm05G013358;Mm06G015812;Mm07G019037;Mm10G024617;Mm11G025375;Mm11G027133;Mm12G028264;Mm12G029054;Mm12G029060;Mm13G031504;Mm14G032821;Mm14G032968;Mm17G037061;Mm17G038062;Mm18G039051;Mm18G039057;Mm19G041016;MmUnG041859;MmUnG042483;MmUnG042583;MmUnG043085;MmUnG043129;MmUnG046263
GO:1901698	response to nitrogen compound	58	654	0.0204161	0.389571	Mm01G001318;Mm01G001369;Mm01G001837;Mm01G001854;Mm01G003438;Mm02G003938;Mm02G004048;Mm02G004055;Mm02G004262;Mm02G004697;Mm02G005361;Mm04G008930;Mm04G009134;Mm04G009135;Mm04G009392;Mm04G009492;Mm04G009909;Mm04G010003;Mm05G012690;Mm06G013914;Mm06G014068;Mm06G015046;Mm06G015832;Mm06G016121;Mm06G016225;Mm07G017838;Mm07G019118;Mm07G019394;Mm08G019937;Mm08G020716;Mm08G021012;Mm08G021655;Mm09G022226;Mm1…
GO:0006807	nitrogen compound metabolic process	605	8471	0.0204581	0.389571	Mm01G000154;Mm01G000231;Mm01G000274;Mm01G000322;Mm01G000463;Mm01G000612;Mm01G000619;Mm01G000620;Mm01G000986;Mm01G001057;Mm01G001106;Mm01G001138;Mm01G001153;Mm01G001220;Mm01G001318;Mm01G001346;Mm01G001382;Mm01G001431;Mm01G001432;Mm01G001445;Mm01G001463;Mm01G001472;Mm01G001474;Mm01G001484;Mm01G001490;Mm01G001499;Mm01G001589;Mm01G001674;Mm01G001720;Mm01G001726;Mm01G001740;Mm01G001817;Mm01G001818;Mm0…
GO:0035725	sodium ion transmembrane transport	6	33	0.0217054	0.389571	Mm02G004048;Mm02G004055;Mm04G009349;Mm06G015832;Mm07G017838;MmUnG044966
GO:0048194	Golgi vesicle budding	6	33	0.0217054	0.389571	Mm08G019412;Mm08G019827;Mm09G022612;Mm13G029853;MmUnG042654;MmUnG045114
GO:0098739	import across plasma membrane	6	33	0.0217054	0.389571	Mm04G009349;Mm06G015832;Mm08G020616;Mm08G020619;MmUnG044966;MmUnG045880
GO:0060429	epithelium development	11	82	0.0218911	0.389571	Mm01G002930;Mm01G003113;Mm02G003859;Mm05G012770;Mm17G036706;Mm18G039716;Mm19G040682;MmUnG041576;MmUnG041859;MmUnG045922;MmUnG046010
GO:0030490	maturation of SSU-rRNA	8	52	0.0226184	0.389571	Mm01G001382;Mm02G005022;Mm03G006735;Mm11G026575;Mm14G033329;MmUnG043328;MmUnG045042;MmUnG045396
GO:0050776	regulation of immune response	25	242	0.0228762	0.389571	Mm01G003438;Mm02G005848;Mm02G005856;Mm05G013358;Mm06G015812;Mm07G019037;Mm10G024617;Mm11G025375;Mm11G027133;Mm12G028264;Mm12G029054;Mm12G029060;Mm13G031504;Mm14G032821;Mm14G032968;Mm17G037061;Mm17G038062;Mm18G039051;Mm18G039057;Mm19G041016;MmUnG042483;MmUnG042583;MmUnG043085;MmUnG043129;MmUnG046263
GO:0005982	starch metabolic process	9	62	0.0228933	0.389571	Mm01G003108;Mm02G005935;Mm04G009839;Mm05G012855;Mm05G013579;Mm07G018700;Mm09G022863;Mm17G037351;MmUnG041854
GO:0009741	response to brassinosteroid	19	172	0.0237708	0.389571	Mm02G004240;Mm02G005975;Mm05G013158;Mm06G016256;Mm07G017321;Mm07G017324;Mm07G017330;Mm07G017331;Mm08G019850;Mm10G024525;Mm11G026760;Mm11G026761;Mm11G026762;Mm13G030733;Mm13G030734;Mm13G030735;Mm15G034293;Mm17G038062;MmUnG042665
GO:0080113	regulation of seed growth	7	43	0.0241423	0.389571	Mm03G007377;Mm06G014089;Mm06G015343;Mm09G023354;Mm13G031020;Mm17G037509;MmUnG044386
GO:0030968	endoplasmic reticulum unfolded protein response	4	17	0.0243981	0.389571	Mm05G013588;Mm05G013602;Mm12G029054;Mm12G029060
GO:0033108	mitochondrial respiratory chain complex assembly	4	17	0.0243981	0.389571	Mm01G002378;Mm02G003950;Mm12G028676;Mm14G032251
GO:0035247	peptidyl-arginine omega-N-methylation	4	17	0.0243981	0.389571	Mm04G009308;Mm04G011190;Mm09G023226;Mm11G025911
GO:0015849	organic acid transport	23	220	0.0249651	0.389571	Mm02G005759;Mm03G007066;Mm03G008128;Mm03G008130;Mm05G012466;Mm05G012498;Mm07G017309;Mm07G019138;Mm08G020616;Mm08G020619;Mm11G026482;Mm12G029507;Mm13G030878;Mm14G032114;Mm15G034473;Mm16G035128;Mm17G036778;Mm18G038811;Mm19G040551;Mm19G040966;Mm19G041282;MmUnG043068;MmUnG043177
GO:0046942	carboxylic acid transport	23	220	0.0249651	0.389571	Mm02G005759;Mm03G007066;Mm03G008128;Mm03G008130;Mm05G012466;Mm05G012498;Mm07G017309;Mm07G019138;Mm08G020616;Mm08G020619;Mm11G026482;Mm12G029507;Mm13G030878;Mm14G032114;Mm15G034473;Mm16G035128;Mm17G036778;Mm18G038811;Mm19G040551;Mm19G040966;Mm19G041282;MmUnG043068;MmUnG043177
GO:0000050	urea cycle	2	4	0.0250383	0.389571	Mm02G005760;Mm16G035357
GO:0003015	heart process	2	4	0.0250383	0.389571	Mm06G015832;Mm06G015873
GO:0006941	striated muscle contraction	2	4	0.0250383	0.389571	Mm06G015832;Mm06G015873
GO:0006942	regulation of striated muscle contraction	2	4	0.0250383	0.389571	Mm06G015832;Mm06G015873
GO:0008016	regulation of heart contraction	2	4	0.0250383	0.389571	Mm06G015832;Mm06G015873
GO:0009228	thiamine biosynthetic process	2	4	0.0250383	0.389571	Mm06G013914;Mm07G017006
GO:0009747	hexokinase-dependent signaling	2	4	0.0250383	0.389571	Mm02G004928;Mm11G025987
GO:0010880	regulation of release of sequestered calcium ion into cytosol by sarcoplasmic reticulum	2	4	0.0250383	0.389571	Mm06G015832;Mm06G015873
GO:0010881	regulation of cardiac muscle contraction by regulation of the release of sequestered calcium ion	2	4	0.0250383	0.389571	Mm06G015832;Mm06G015873
GO:0010882	regulation of cardiac muscle contraction by calcium ion signaling	2	4	0.0250383	0.389571	Mm06G015832;Mm06G015873
GO:0014808	release of sequestered calcium ion into cytosol by sarcoplasmic reticulum	2	4	0.0250383	0.389571	Mm06G015832;Mm06G015873
GO:0015709	thiosulfate transport	2	4	0.0250383	0.389571	Mm14G032114;Mm16G035128
GO:0015744	succinate transport	2	4	0.0250383	0.389571	Mm14G032114;Mm16G035128
GO:0019627	urea metabolic process	2	4	0.0250383	0.389571	Mm02G005760;Mm16G035357
GO:0032868	response to insulin	2	4	0.0250383	0.389571	Mm02G004262;Mm13G031139
GO:0032869	cellular response to insulin stimulus	2	4	0.0250383	0.389571	Mm02G004262;Mm13G031139
GO:0042724	thiamine-containing compound biosynthetic process	2	4	0.0250383	0.389571	Mm06G013914;Mm07G017006
GO:0044821	meiotic telomere tethering at nuclear periphery	2	4	0.0250383	0.389571	Mm04G010461;Mm04G010487
GO:0045141	meiotic telomere clustering	2	4	0.0250383	0.389571	Mm04G010461;Mm04G010487
GO:0051928	positive regulation of calcium ion transport	2	4	0.0250383	0.389571	Mm06G015873;Mm16G036446
GO:0055117	regulation of cardiac muscle contraction	2	4	0.0250383	0.389571	Mm06G015832;Mm06G015873
GO:0060047	heart contraction	2	4	0.0250383	0.389571	Mm06G015832;Mm06G015873
GO:0060048	cardiac muscle contraction	2	4	0.0250383	0.389571	Mm06G015832;Mm06G015873
GO:0061337	cardiac conduction	2	4	0.0250383	0.389571	Mm06G015832;Mm06G015873
GO:0070197	meiotic attachment of telomere to nuclear envelope	2	4	0.0250383	0.389571	Mm04G010461;Mm04G010487
GO:0070296	sarcoplasmic reticulum calcium ion transport	2	4	0.0250383	0.389571	Mm06G015832;Mm06G015873
GO:0071375	cellular response to peptide hormone stimulus	2	4	0.0250383	0.389571	Mm02G004262;Mm13G031139
GO:0071422	succinate transmembrane transport	2	4	0.0250383	0.389571	Mm14G032114;Mm16G035128
GO:0086065	cell communication involved in cardiac conduction	2	4	0.0250383	0.389571	Mm06G015832;Mm06G015873
GO:0090220	chromosome localization to nuclear envelope involved in homologous chromosome segregation	2	4	0.0250383	0.389571	Mm04G010461;Mm04G010487
GO:0097240	chromosome attachment to the nuclear envelope	2	4	0.0250383	0.389571	Mm04G010461;Mm04G010487
GO:1900030	regulation of pectin biosynthetic process	2	4	0.0250383	0.389571	Mm12G028264;MmUnG042483
GO:1901653	cellular response to peptide	2	4	0.0250383	0.389571	Mm02G004262;Mm13G031139
GO:1903514	calcium ion transport from endoplasmic reticulum to cytosol	2	4	0.0250383	0.389571	Mm06G015832;Mm06G015873
GO:1904427	positive regulation of calcium ion transmembrane transport	2	4	0.0250383	0.389571	Mm06G015873;Mm16G036446
GO:0048193	Golgi vesicle transport	19	173	0.0250764	0.389571	Mm02G004959;Mm02G004960;Mm02G005075;Mm02G005077;Mm02G005961;Mm04G009672;Mm06G015873;Mm06G016042;Mm06G016080;Mm08G019412;Mm08G019827;Mm09G022612;Mm12G027798;Mm13G029853;Mm17G036760;MmUnG041576;MmUnG042654;MmUnG045114;MmUnG046024
GO:0044042	glucan metabolic process	19	174	0.0264357	0.40888	Mm01G002903;Mm01G003108;Mm01G003560;Mm02G005935;Mm04G009158;Mm04G009839;Mm05G012855;Mm05G013579;Mm07G017201;Mm07G018226;Mm07G018700;Mm08G020226;Mm09G022863;Mm10G024760;Mm11G027133;Mm12G028249;Mm17G037351;MmUnG041854;MmUnG045228
GO:0080112	seed growth	7	44	0.0270905	0.41717	Mm03G007377;Mm06G014089;Mm06G015343;Mm09G023354;Mm13G031020;Mm17G037509;MmUnG044386
GO:0072598	protein localization to chloroplast	8	54	0.0277971	0.424328	Mm02G005411;Mm04G010704;Mm05G012458;Mm05G012489;Mm05G013457;Mm12G029046;Mm13G031117;Mm13G031361
GO:1900055	regulation of leaf senescence	8	54	0.0277971	0.424328	Mm01G003438;Mm03G006945;Mm03G008617;Mm13G031504;Mm14G032821;Mm14G032968;MmUnG042583;MmUnG045156
GO:0006099	tricarboxylic acid cycle	5	26	0.0281047	0.425325	Mm07G018703;Mm12G029280;Mm18G039163;Mm19G040452;MmUnG045097
GO:0043090	amino acid import	5	26	0.0281047	0.425325	Mm05G012466;Mm05G012498;Mm08G020616;Mm08G020619;Mm15G034473
GO:1903825	organic acid transmembrane transport	21	199	0.0284779	0.429124	Mm02G005759;Mm03G007066;Mm03G008128;Mm03G008130;Mm05G012466;Mm05G012498;Mm07G017309;Mm07G019138;Mm08G020616;Mm08G020619;Mm11G026482;Mm12G029507;Mm13G030878;Mm14G032114;Mm15G034473;Mm16G035128;Mm17G036778;Mm18G038811;Mm19G040966;MmUnG043068;MmUnG043177
GO:0014070	response to organic cyclic compound	60	694	0.0293285	0.436775	Mm01G001138;Mm01G001463;Mm01G001472;Mm01G002378;Mm01G003438;Mm02G003938;Mm02G004240;Mm02G004568;Mm02G005361;Mm02G005975;Mm04G008930;Mm04G009134;Mm04G009135;Mm05G013150;Mm05G013158;Mm05G013358;Mm06G013914;Mm06G014068;Mm06G014134;Mm06G015832;Mm06G016256;Mm07G017321;Mm07G017324;Mm07G017330;Mm07G017331;Mm08G019850;Mm08G019998;Mm08G019999;Mm08G020004;Mm08G021655;Mm10G024525;Mm11G026586;Mm11G026760;Mm1…
GO:0035246	peptidyl-arginine N-methylation	4	18	0.0297321	0.436775	Mm04G009308;Mm04G011190;Mm09G023226;Mm11G025911
GO:0052167	modulation by symbiont of host innate immune response	4	18	0.0297321	0.436775	Mm02G005848;Mm02G005856;Mm06G015812;MmUnG043085
GO:0052169	pathogen-associated molecular pattern dependent modulation by symbiont of host innate immune response	4	18	0.0297321	0.436775	Mm02G005848;Mm02G005856;Mm06G015812;MmUnG043085
GO:0052306	modulation by organism of innate immune response in other organism involved in symbiotic interaction	4	18	0.0297321	0.436775	Mm02G005848;Mm02G005856;Mm06G015812;MmUnG043085
GO:0052308	pathogen-associated molecular pattern dependent modulation by organism of innate immune response in other organism involved in symbiotic interaction	4	18	0.0297321	0.436775	Mm02G005848;Mm02G005856;Mm06G015812;MmUnG043085
GO:0008361	regulation of cell size	7	45	0.0302742	0.442887	Mm02G004697;Mm06G015932;Mm08G019998;Mm08G019999;Mm08G020004;Mm14G031635;Mm16G036220
GO:0017038	protein import	16	142	0.0306212	0.446104	Mm01G001369;Mm01G001899;Mm02G004082;Mm02G004133;Mm02G004262;Mm02G005411;Mm03G006808;Mm04G010171;Mm06G015322;Mm07G017368;Mm08G021065;Mm10G024805;Mm13G029855;Mm13G031168;Mm16G036580;MmUnG043444
GO:0008544	epidermis development	5	27	0.0326315	0.471479	Mm01G002930;Mm17G036706;Mm19G040682;MmUnG045922;MmUnG046010
GO:0009913	epidermal cell differentiation	5	27	0.0326315	0.471479	Mm01G002930;Mm17G036706;Mm19G040682;MmUnG045922;MmUnG046010
GO:0006487	protein N-linked glycosylation	9	66	0.0329213	0.47321	Mm01G002028;Mm07G019154;Mm11G025602;Mm11G025662;Mm11G025997;Mm12G029054;Mm12G029060;MmUnG042136;MmUnG045406
GO:0035967	cellular response to topologically incorrect protein	8	56	0.0337427	0.47321	Mm04G009392;Mm04G009492;Mm05G012370;Mm05G013588;Mm05G013602;Mm12G028494;Mm12G029054;Mm12G029060
GO:0006610	ribosomal protein import into nucleus	3	11	0.0338296	0.47321	Mm01G001369;Mm04G010171;Mm08G021065
GO:0007444	imaginal disc development	3	11	0.0338296	0.47321	Mm01G003113;Mm19G040682;MmUnG041859
GO:0007498	mesoderm development	3	11	0.0338296	0.47321	Mm01G003113;Mm06G014582;MmUnG041859
GO:0007613	memory	3	11	0.0338296	0.47321	Mm01G003113;Mm06G015832;MmUnG041859
GO:0015786	UDP-glucose transport	3	11	0.0338296	0.47321	Mm05G013588;Mm05G013602;Mm18G039510
GO:0048578	positive regulation of long-day photoperiodism, flowering	3	11	0.0338296	0.47321	Mm11G027583;Mm11G027600;Mm16G035189
GO:0015748	organophosphate ester transport	16	144	0.0342595	0.477323	Mm01G001589;Mm02G004974;Mm02G005067;Mm03G008128;Mm03G008130;Mm05G013588;Mm05G013602;Mm08G019412;Mm08G019827;Mm09G022612;Mm13G029853;Mm13G030975;Mm18G039510;Mm19G041280;MmUnG042654;MmUnG045114
GO:0010107	potassium ion import	4	19	0.0357008	0.491879	Mm04G009349;Mm10G025057;Mm17G037647;MmUnG044966
GO:0034969	histone arginine methylation	4	19	0.0357008	0.491879	Mm04G009308;Mm04G011190;Mm09G023226;Mm11G025911
GO:0007568	aging	25	253	0.0365735	0.491879	Mm01G003438;Mm03G006945;Mm03G007220;Mm03G008617;Mm04G009134;Mm04G009135;Mm05G011543;Mm05G013358;Mm06G014089;Mm06G015343;Mm07G018237;Mm07G019118;Mm09G022819;Mm10G024785;Mm12G028226;Mm13G031020;Mm13G031139;Mm13G031504;Mm14G032821;Mm14G032968;Mm17G037509;Mm17G038062;MmUnG042583;MmUnG044386;MmUnG045156
GO:0051170	nuclear import	10	78	0.0369558	0.491879	Mm01G001369;Mm01G001899;Mm02G004262;Mm03G006808;Mm04G010171;Mm07G017368;Mm08G021065;Mm10G024805;Mm16G035214;MmUnG043444
GO:0009404	toxin metabolic process	8	57	0.0370164	0.491879	Mm01G002176;Mm03G008617;Mm06G016121;Mm13G031123;MmUnG042945;MmUnG044674;MmUnG045871;MmUnG045872
GO:0048586	regulation of long-day photoperiodism, flowering	8	57	0.0370164	0.491879	Mm04G009764;Mm07G016671;Mm11G026542;Mm11G027583;Mm11G027600;Mm16G035189;MmUnG042784;MmUnG044145
GO:0034504	protein localization to nucleus	11	89	0.0373739	0.491879	Mm01G001369;Mm01G001899;Mm02G004262;Mm03G006808;Mm04G010171;Mm04G010461;Mm04G010487;Mm07G017368;Mm08G021065;Mm10G024805;MmUnG043444
GO:0006515	misfolded or incompletely synthesized protein catabolic process	5	28	0.0375872	0.491879	Mm05G012370;Mm09G022128;Mm11G026337;Mm12G029054;Mm12G029060
GO:0042147	retrograde transport, endosome to Golgi	5	28	0.0375872	0.491879	Mm02G006073;Mm04G009672;Mm10G024923;Mm14G032401;Mm17G036760
GO:1904062	regulation of cation transmembrane transport	5	28	0.0375872	0.491879	Mm03G007350;Mm06G015832;Mm06G015873;Mm12G028676;Mm16G036446
GO:0033365	protein localization to organelle	31	329	0.0385225	0.491879	Mm01G001369;Mm01G001899;Mm02G004082;Mm02G004133;Mm02G004262;Mm02G005411;Mm03G006808;Mm04G010171;Mm04G010461;Mm04G010487;Mm04G010704;Mm05G012458;Mm05G012489;Mm05G013457;Mm06G015322;Mm06G015873;Mm07G017368;Mm07G019154;Mm08G021065;Mm10G024805;Mm11G027133;Mm12G029046;Mm13G029855;Mm13G031117;Mm13G031139;Mm13G031168;Mm13G031361;Mm16G036580;Mm18G039092;MmUnG043444;MmUnG044681
GO:0016139	glycoside catabolic process	2	5	0.0398736	0.491879	Mm07G017418;Mm10G025034
GO:0033135	regulation of peptidyl-serine phosphorylation	2	5	0.0398736	0.491879	Mm02G004262;Mm12G028424
GO:0043434	response to peptide hormone	2	5	0.0398736	0.491879	Mm02G004262;Mm13G031139
GO:0048524	positive regulation of viral process	2	5	0.0398736	0.491879	Mm14G033223;MmUnG046009
GO:0070934	CRD-mediated mRNA stabilization	2	5	0.0398736	0.491879	Mm19G040510;MmUnG045466
GO:0009225	nucleotide-sugar metabolic process	7	48	0.0413023	0.491879	Mm01G001431;Mm01G002627;Mm02G005321;Mm12G028742;Mm12G029054;Mm12G029060;Mm15G034679
GO:0018195	peptidyl-arginine modification	4	20	0.0423104	0.491879	Mm04G009308;Mm04G011190;Mm09G023226;Mm11G025911
GO:0018216	peptidyl-arginine methylation	4	20	0.0423104	0.491879	Mm04G009308;Mm04G011190;Mm09G023226;Mm11G025911
GO:0042753	positive regulation of circadian rhythm	4	20	0.0423104	0.491879	Mm06G014089;Mm13G031020;Mm17G037509;MmUnG044386
GO:0016444	somatic cell DNA recombination	3	12	0.0428899	0.491879	Mm16G035519;Mm18G039051;Mm18G039057
GO:0046500	S-adenosylmethionine metabolic process	3	12	0.0428899	0.491879	Mm17G037778;Mm17G038062;MmUnG045874
GO:0051291	protein heterooligomerization	3	12	0.0428899	0.491879	Mm04G010461;Mm04G010487;Mm08G020143
GO:0072527	pyrimidine-containing compound metabolic process	10	80	0.0429055	0.491879	Mm01G002717;Mm02G003796;Mm04G009546;Mm04G010064;Mm06G013914;Mm07G016579;Mm07G016630;Mm07G017006;Mm15G033964;Mm19G039901
GO:0034637	cellular carbohydrate biosynthetic process	21	208	0.0429517	0.491879	Mm01G002619;Mm01G002625;Mm01G003560;Mm03G008617;Mm04G009158;Mm04G009726;Mm04G009736;Mm04G009839;Mm05G013149;Mm07G016361;Mm07G016752;Mm07G018845;Mm08G020226;Mm10G024791;Mm11G027108;Mm11G027133;Mm12G028249;Mm14G032476;Mm15G034693;Mm16G035156;MmUnG045228
GO:0044275	cellular carbohydrate catabolic process	8	59	0.0441884	0.491879	Mm01G003108;Mm02G005935;Mm05G012855;Mm05G013579;Mm07G018226;Mm09G022863;Mm17G037351;MmUnG041854
GO:0060548	negative regulation of cell death	13	114	0.0442688	0.491879	Mm02G004039;Mm02G004262;Mm06G016107;Mm07G016721;Mm11G027129;Mm11G027133;Mm11G027473;Mm11G027477;Mm14G032085;Mm15G034182;Mm16G036446;Mm17G037061;MmUnG041876
GO:0006814	sodium ion transport	6	39	0.0454729	0.491879	Mm02G004048;Mm02G004055;Mm04G009349;Mm06G015832;Mm07G017838;MmUnG044966
GO:0072594	establishment of protein localization to organelle	26	271	0.0454789	0.491879	Mm01G001369;Mm01G001899;Mm02G004082;Mm02G004133;Mm02G004262;Mm02G005411;Mm03G006808;Mm04G010171;Mm04G010704;Mm05G012458;Mm05G012489;Mm05G013457;Mm06G015322;Mm07G017368;Mm07G019154;Mm08G021065;Mm10G024805;Mm12G029046;Mm13G029855;Mm13G031117;Mm13G031139;Mm13G031168;Mm16G036580;Mm18G039092;MmUnG043444;MmUnG044681
GO:0034605	cellular response to heat	15	138	0.0464777	0.491879	Mm04G009053;Mm04G009242;Mm04G009392;Mm04G009492;Mm06G016121;Mm07G017726;Mm07G018491;Mm08G021642;Mm12G028264;Mm12G028494;Mm13G031123;Mm18G038405;Mm19G040917;MmUnG041596;MmUnG042483
GO:0044238	primary metabolic process	658	9348	0.0478513	0.491879	Mm01G000154;Mm01G000231;Mm01G000274;Mm01G000322;Mm01G000463;Mm01G000612;Mm01G000619;Mm01G000620;Mm01G000986;Mm01G001057;Mm01G001106;Mm01G001138;Mm01G001153;Mm01G001220;Mm01G001318;Mm01G001346;Mm01G001382;Mm01G001431;Mm01G001432;Mm01G001445;Mm01G001463;Mm01G001472;Mm01G001474;Mm01G001484;Mm01G001490;Mm01G001499;Mm01G001589;Mm01G001674;Mm01G001720;Mm01G001726;Mm01G001740;Mm01G001817;Mm01G001818;Mm0…
GO:0001101	response to acid chemical	142	1841	0.0486971	0.491879	Mm01G000619;Mm01G000620;Mm01G001138;Mm01G001318;Mm01G001369;Mm01G001463;Mm01G001472;Mm01G002102;Mm01G002176;Mm01G002373;Mm01G002378;Mm01G003438;Mm01G003546;Mm01G003560;Mm01G003592;Mm02G003938;Mm02G004048;Mm02G004055;Mm02G004568;Mm02G004697;Mm02G005335;Mm02G005361;Mm02G005742;Mm02G006288;Mm03G006505;Mm03G006667;Mm03G006808;Mm03G006866;Mm03G007044;Mm03G007145;Mm03G007413;Mm04G009134;Mm04G009135;Mm0…
GO:0009692	ethylene metabolic process	5	30	0.0488112	0.491879	Mm02G004662;Mm07G019393;Mm07G019394;MmUnG044121;MmUnG044122
GO:0009693	ethylene biosynthetic process	5	30	0.0488112	0.491879	Mm02G004662;Mm07G019393;Mm07G019394;MmUnG044121;MmUnG044122
GO:0043449	cellular alkene metabolic process	5	30	0.0488112	0.491879	Mm02G004662;Mm07G019393;Mm07G019394;MmUnG044121;MmUnG044122
GO:0043450	alkene biosynthetic process	5	30	0.0488112	0.491879	Mm02G004662;Mm07G019393;Mm07G019394;MmUnG044121;MmUnG044122
GO:1900674	olefin biosynthetic process	5	30	0.0488112	0.491879	Mm02G004662;Mm07G019393;Mm07G019394;MmUnG044121;MmUnG044122
GO:0006863	purine nucleobase transport	4	21	0.0495616	0.491879	Mm01G003425;Mm02G005700;MmUnG043657;MmUnG045880
GO:0009901	anther dehiscence	4	21	0.0495616	0.491879	Mm02G004021;Mm08G020743;Mm11G027133;Mm11G027349
GO:0045740	positive regulation of DNA replication	4	21	0.0495616	0.491879	Mm02G005361;Mm04G009716;Mm16G036446;MmUnG044681
GO:0052031	modulation by symbiont of host defense response	4	21	0.0495616	0.491879	Mm02G005848;Mm02G005856;Mm06G015812;MmUnG043085
GO:0052173	response to defenses of other organism involved in symbiotic interaction	4	21	0.0495616	0.491879	Mm02G005848;Mm02G005856;Mm06G015812;MmUnG043085
GO:0052200	response to host defenses	4	21	0.0495616	0.491879	Mm02G005848;Mm02G005856;Mm06G015812;MmUnG043085
GO:0052255	modulation by organism of defense response of other organism involved in symbiotic interaction	4	21	0.0495616	0.491879	Mm02G005848;Mm02G005856;Mm06G015812;MmUnG043085
GO:0052552	modulation by organism of immune response of other organism involved in symbiotic interaction	4	21	0.0495616	0.491879	Mm02G005848;Mm02G005856;Mm06G015812;MmUnG043085
GO:0052553	modulation by symbiont of host immune response	4	21	0.0495616	0.491879	Mm02G005848;Mm02G005856;Mm06G015812;MmUnG043085
GO:0052564	response to immune response of other organism involved in symbiotic interaction	4	21	0.0495616	0.491879	Mm02G005848;Mm02G005856;Mm06G015812;MmUnG043085
GO:0052572	response to host immune response	4	21	0.0495616	0.491879	Mm02G005848;Mm02G005856;Mm06G015812;MmUnG043085
GO:0075136	response to host	4	21	0.0495616	0.491879	Mm02G005848;Mm02G005856;Mm06G015812;MmUnG043085
GO:1904823	purine nucleobase transmembrane transport	4	21	0.0495616	0.491879	Mm01G003425;Mm02G005700;MmUnG043657;MmUnG045880
GO:0006725	cellular aromatic compound metabolic process	388	5367	0.0503429	0.491879	Mm01G000154;Mm01G000231;Mm01G000274;Mm01G000322;Mm01G000612;Mm01G001057;Mm01G001138;Mm01G001153;Mm01G001346;Mm01G001382;Mm01G001431;Mm01G001432;Mm01G001463;Mm01G001472;Mm01G001484;Mm01G001499;Mm01G001589;Mm01G001674;Mm01G001740;Mm01G001817;Mm01G001818;Mm01G001829;Mm01G001854;Mm01G001862;Mm01G001890;Mm01G002105;Mm01G002243;Mm01G002377;Mm01G002627;Mm01G002629;Mm01G002675;Mm01G002717;Mm01G002848;Mm0…
GO:0015749	monosaccharide transport	6	40	0.0505622	0.491879	Mm04G009094;Mm07G019138;Mm07G019324;Mm12G029137;Mm18G038806;MmUnG044154
GO:0005976	polysaccharide metabolic process	29	313	0.0528243	0.491879	Mm01G002619;Mm01G002625;Mm01G002627;Mm01G002903;Mm01G003108;Mm01G003560;Mm02G005935;Mm04G009158;Mm04G009839;Mm05G012855;Mm05G013579;Mm07G017201;Mm07G018226;Mm07G018700;Mm08G020226;Mm09G022863;Mm10G024760;Mm10G024791;Mm11G026870;Mm11G027133;Mm12G028249;Mm12G028264;Mm14G032476;Mm15G034693;Mm16G035156;Mm17G037351;MmUnG041854;MmUnG042483;MmUnG045228
GO:0007552	metamorphosis	3	13	0.0530281	0.491879	Mm01G003113;Mm19G040682;MmUnG041859
GO:0007611	learning or memory	3	13	0.0530281	0.491879	Mm01G003113;Mm06G015832;MmUnG041859
GO:0010120	camalexin biosynthetic process	3	13	0.0530281	0.491879	Mm03G008617;Mm06G016121;Mm13G031123
GO:0030856	regulation of epithelial cell differentiation	3	13	0.0530281	0.491879	Mm01G002930;Mm18G039716;MmUnG046010
GO:0048707	instar larval or pupal morphogenesis	3	13	0.0530281	0.491879	Mm01G003113;Mm19G040682;MmUnG041859
GO:0051924	regulation of calcium ion transport	3	13	0.0530281	0.491879	Mm06G015832;Mm06G015873;Mm16G036446
GO:0052317	camalexin metabolic process	3	13	0.0530281	0.491879	Mm03G008617;Mm06G016121;Mm13G031123
GO:0097369	sodium ion import	3	13	0.0530281	0.491879	Mm04G009349;Mm06G015832;MmUnG044966
GO:0098719	sodium ion import across plasma membrane	3	13	0.0530281	0.491879	Mm04G009349;Mm06G015832;MmUnG044966
GO:1901409	positive regulation of phosphorylation of RNA polymerase II C-terminal domain	3	13	0.0530281	0.491879	Mm06G016083;Mm17G037550;MmUnG041650
GO:1990118	sodium ion import into cell	3	13	0.0530281	0.491879	Mm04G009349;Mm06G015832;MmUnG044966
GO:0015672	monovalent inorganic cation transport	30	326	0.0533252	0.491879	Mm01G000443;Mm01G001946;Mm02G004048;Mm02G004055;Mm03G007350;Mm04G008790;Mm04G008795;Mm04G009094;Mm04G009349;Mm04G009657;Mm06G015832;Mm06G015873;Mm07G016854;Mm07G017838;Mm07G019324;Mm10G025057;Mm12G028676;Mm12G029137;Mm12G029210;Mm12G029507;Mm14G032114;Mm14G032807;Mm14G033555;Mm17G037647;Mm18G038806;Mm19G041159;MmUnG043376;MmUnG043382;MmUnG044154;MmUnG044966
GO:0006486	protein glycosylation	12	106	0.0543121	0.491879	Mm01G002028;Mm04G009716;Mm07G019154;Mm11G025602;Mm11G025662;Mm11G025997;Mm12G029054;Mm12G029060;Mm18G039484;MmUnG042136;MmUnG042205;MmUnG045406
GO:0043413	macromolecule glycosylation	12	106	0.0543121	0.491879	Mm01G002028;Mm04G009716;Mm07G019154;Mm11G025602;Mm11G025662;Mm11G025997;Mm12G029054;Mm12G029060;Mm18G039484;MmUnG042136;MmUnG042205;MmUnG045406
GO:0048579	negative regulation of long-day photoperiodism, flowering	5	31	0.0550867	0.491879	Mm04G009764;Mm07G016671;Mm11G026542;MmUnG042784;MmUnG044145
GO:0016051	carbohydrate biosynthetic process	28	302	0.0558972	0.491879	Mm01G002431;Mm01G002619;Mm01G002625;Mm01G003560;Mm03G008617;Mm04G009158;Mm04G009726;Mm04G009736;Mm04G009839;Mm05G013149;Mm07G016361;Mm07G016752;Mm07G018845;Mm07G018949;Mm07G019154;Mm08G020226;Mm10G024791;Mm11G026870;Mm11G027108;Mm11G027133;Mm12G028249;Mm12G028264;Mm14G032476;Mm15G034693;Mm16G035156;MmUnG042483;MmUnG045228;MmUnG045406
GO:0006606	protein import into nucleus	9	73	0.0570789	0.491879	Mm01G001369;Mm01G001899;Mm02G004262;Mm03G006808;Mm04G010171;Mm07G017368;Mm08G021065;Mm10G024805;MmUnG043444
GO:0035966	response to topologically incorrect protein	9	73	0.0570789	0.491879	Mm04G009053;Mm04G009392;Mm04G009492;Mm05G012370;Mm05G013588;Mm05G013602;Mm12G028494;Mm12G029054;Mm12G029060
GO:0044744	protein targeting to nucleus	9	73	0.0570789	0.491879	Mm01G001369;Mm01G001899;Mm02G004262;Mm03G006808;Mm04G010171;Mm07G017368;Mm08G021065;Mm10G024805;MmUnG043444
GO:1902593	single-organism nuclear import	9	73	0.0570789	0.491879	Mm01G001369;Mm01G001899;Mm02G004262;Mm03G006808;Mm04G010171;Mm07G017368;Mm08G021065;Mm10G024805;MmUnG043444
GO:0001887	selenium compound metabolic process	2	6	0.0571648	0.491879	Mm17G037778;MmUnG045874
GO:0006011	UDP-glucose metabolic process	2	6	0.0571648	0.491879	Mm12G029054;Mm12G029060
GO:0006937	regulation of muscle contraction	2	6	0.0571648	0.491879	Mm06G015832;Mm06G015873
GO:0007596	blood coagulation	2	6	0.0571648	0.491879	Mm08G020743;Mm11G027349
GO:0007599	hemostasis	2	6	0.0571648	0.491879	Mm08G020743;Mm11G027349
GO:0009219	pyrimidine deoxyribonucleotide metabolic process	2	6	0.0571648	0.491879	Mm01G002717;Mm19G039901
GO:0031061	negative regulation of histone methylation	2	6	0.0571648	0.491879	Mm18G039051;Mm18G039057
GO:0050792	regulation of viral process	2	6	0.0571648	0.491879	Mm14G033223;MmUnG046009
GO:0050817	coagulation	2	6	0.0571648	0.491879	Mm08G020743;Mm11G027349
GO:0051702	interaction with symbiont	2	6	0.0571648	0.491879	Mm14G033223;MmUnG046009
GO:0051851	modification by host of symbiont morphology or physiology	2	6	0.0571648	0.491879	Mm14G033223;MmUnG046009
GO:0090257	regulation of muscle system process	2	6	0.0571648	0.491879	Mm06G015832;Mm06G015873
GO:1901652	response to peptide	2	6	0.0571648	0.491879	Mm02G004262;Mm13G031139
GO:2001237	negative regulation of extrinsic apoptotic signaling pathway	2	6	0.0571648	0.491879	Mm02G004262;Mm07G016721
GO:0015851	nucleobase transport	4	22	0.0574503	0.491879	Mm01G003425;Mm02G005700;MmUnG043657;MmUnG045880
GO:0015866	ADP transport	4	22	0.0574503	0.491879	Mm01G001589;Mm02G004974;Mm02G005067;Mm19G041280
GO:0060562	epithelial tube morphogenesis	4	22	0.0574503	0.491879	Mm01G003113;Mm02G003859;Mm19G040682;MmUnG041859
GO:0045036	protein targeting to chloroplast	7	52	0.0596354	0.491879	Mm02G005411;Mm04G010704;Mm05G012458;Mm05G012489;Mm05G013457;Mm12G029046;Mm13G031117
GO:0072596	establishment of protein localization to chloroplast	7	52	0.0596354	0.491879	Mm02G005411;Mm04G010704;Mm05G012458;Mm05G012489;Mm05G013457;Mm12G029046;Mm13G031117
GO:0006073	cellular glucan metabolic process	17	167	0.0598557	0.491879	Mm01G003108;Mm01G003560;Mm02G005935;Mm04G009158;Mm04G009839;Mm05G012855;Mm05G013579;Mm07G017201;Mm07G018226;Mm07G018700;Mm08G020226;Mm09G022863;Mm11G027133;Mm12G028249;Mm17G037351;MmUnG041854;MmUnG045228
GO:0044264	cellular polysaccharide metabolic process	23	241	0.060001	0.491879	Mm01G002619;Mm01G002625;Mm01G003108;Mm01G003560;Mm02G005935;Mm04G009158;Mm04G009839;Mm05G012855;Mm05G013579;Mm07G017201;Mm07G018226;Mm07G018700;Mm08G020226;Mm09G022863;Mm10G024791;Mm11G027133;Mm12G028249;Mm14G032476;Mm15G034693;Mm16G035156;Mm17G037351;MmUnG041854;MmUnG045228
GO:0009407	toxin catabolic process	5	32	0.0618058	0.491879	Mm01G002176;MmUnG042945;MmUnG044674;MmUnG045871;MmUnG045872
GO:0090487	secondary metabolite catabolic process	5	32	0.0618058	0.491879	Mm01G002176;MmUnG042945;MmUnG044674;MmUnG045871;MmUnG045872
GO:1900673	olefin metabolic process	5	32	0.0618058	0.491879	Mm02G004662;Mm07G019393;Mm07G019394;MmUnG044121;MmUnG044122
GO:0006000	fructose metabolic process	3	14	0.0642005	0.491879	Mm01G002431;Mm15G033600;Mm15G033611
GO:0006356	regulation of transcription from RNA polymerase I promoter	3	14	0.0642005	0.491879	Mm12G028424;MmUnG043328;MmUnG045396
GO:0007423	sensory organ development	3	14	0.0642005	0.491879	Mm01G003113;Mm19G040682;MmUnG041859
GO:0032206	positive regulation of telomere maintenance	3	14	0.0642005	0.491879	Mm04G009716;Mm11G026586;MmUnG044681
GO:0035107	appendage morphogenesis	3	14	0.0642005	0.491879	Mm01G003113;Mm19G040682;MmUnG041859
GO:0045943	positive regulation of transcription from RNA polymerase I promoter	3	14	0.0642005	0.491879	Mm12G028424;MmUnG043328;MmUnG045396
GO:0048736	appendage development	3	14	0.0642005	0.491879	Mm01G003113;Mm19G040682;MmUnG041859
GO:0052033	pathogen-associated molecular pattern dependent induction by symbiont of host innate immune response	3	14	0.0642005	0.491879	Mm02G005848;Mm02G005856;Mm06G015812
GO:0052166	positive regulation by symbiont of host innate immune response	3	14	0.0642005	0.491879	Mm02G005848;Mm02G005856;Mm06G015812
GO:0052257	pathogen-associated molecular pattern dependent induction by organism of innate immune response of other organism involved in symbiotic interaction	3	14	0.0642005	0.491879	Mm02G005848;Mm02G005856;Mm06G015812
GO:0052305	positive regulation by organism of innate immune response in other organism involved in symbiotic interaction	3	14	0.0642005	0.491879	Mm02G005848;Mm02G005856;Mm06G015812
GO:0052509	positive regulation by symbiont of host defense response	3	14	0.0642005	0.491879	Mm02G005848;Mm02G005856;Mm06G015812
GO:0052510	positive regulation by organism of defense response of other organism involved in symbiotic interaction	3	14	0.0642005	0.491879	Mm02G005848;Mm02G005856;Mm06G015812
GO:0098659	inorganic cation import into cell	3	14	0.0642005	0.491879	Mm04G009349;Mm06G015832;MmUnG044966
GO:0099587	inorganic ion import into cell	3	14	0.0642005	0.491879	Mm04G009349;Mm06G015832;MmUnG044966
GO:1901407	regulation of phosphorylation of RNA polymerase II C-terminal domain	3	14	0.0642005	0.491879	Mm06G016083;Mm17G037550;MmUnG041650
GO:0006979	response to oxidative stress	49	581	0.0642783	0.491879	Mm01G001138;Mm01G001837;Mm01G002102;Mm01G003281;Mm01G003560;Mm02G005361;Mm04G009134;Mm04G009135;Mm04G009392;Mm04G009492;Mm04G009716;Mm04G009816;Mm05G012271;Mm06G015712;Mm06G015832;Mm06G016225;Mm07G017480;Mm07G017654;Mm07G017682;Mm07G018703;Mm07G019394;Mm08G019453;Mm08G019835;Mm08G020143;Mm08G020159;Mm08G020226;Mm08G020826;Mm09G022658;Mm11G026624;Mm11G026870;Mm11G027583;Mm11G027600;Mm12G028226;Mm1…
GO:1901264	carbohydrate derivative transport	12	109	0.0645238	0.491879	Mm01G001589;Mm02G004974;Mm02G005067;Mm03G008128;Mm03G008130;Mm05G013588;Mm05G013602;Mm10G024448;Mm13G030975;Mm18G038811;Mm18G039510;Mm19G041280
GO:0071806	protein transmembrane transport	10	86	0.0645533	0.491879	Mm02G004082;Mm02G004133;Mm02G005411;Mm06G015322;Mm13G029855;Mm13G031168;Mm13G031495;Mm16G036580;Mm18G039092;Mm19G040535
GO:0006464	cellular protein modification process	198	2654	0.0649496	0.491879	Mm01G000463;Mm01G000612;Mm01G000619;Mm01G000620;Mm01G000986;Mm01G001106;Mm01G001153;Mm01G001220;Mm01G001318;Mm01G001432;Mm01G001445;Mm01G001463;Mm01G001472;Mm01G001474;Mm01G001490;Mm01G001720;Mm01G001726;Mm01G001854;Mm01G001879;Mm01G001901;Mm01G001959;Mm01G001987;Mm01G002028;Mm01G002030;Mm01G002303;Mm01G002304;Mm01G002305;Mm01G002306;Mm01G002309;Mm01G002373;Mm01G003113;Mm01G003313;Mm02G004021;Mm0…
GO:0036211	protein modification process	198	2654	0.0649496	0.491879	Mm01G000463;Mm01G000612;Mm01G000619;Mm01G000620;Mm01G000986;Mm01G001106;Mm01G001153;Mm01G001220;Mm01G001318;Mm01G001432;Mm01G001445;Mm01G001463;Mm01G001472;Mm01G001474;Mm01G001490;Mm01G001720;Mm01G001726;Mm01G001854;Mm01G001879;Mm01G001901;Mm01G001959;Mm01G001987;Mm01G002028;Mm01G002030;Mm01G002303;Mm01G002304;Mm01G002305;Mm01G002306;Mm01G002309;Mm01G002373;Mm01G003113;Mm01G003313;Mm02G004021;Mm0…
GO:0009555	pollen development	35	397	0.0650818	0.491879	Mm01G000612;Mm01G001138;Mm01G001431;Mm01G002619;Mm01G002625;Mm02G004021;Mm02G005361;Mm03G006505;Mm03G008591;Mm04G009673;Mm04G010289;Mm05G013358;Mm05G013489;Mm05G013588;Mm05G013602;Mm06G015844;Mm07G018468;Mm08G019441;Mm08G020698;Mm08G020743;Mm11G026018;Mm11G027133;Mm11G027349;Mm12G027690;Mm12G029486;Mm13G030878;Mm14G031738;Mm14G032476;Mm14G033462;Mm16G036458;Mm17G036924;MmUnG043085;MmUnG045653;MmU…
GO:1901679	nucleotide transmembrane transport	8	64	0.0659217	0.491879	Mm01G001589;Mm02G004974;Mm02G005067;Mm05G013588;Mm05G013602;Mm13G030975;Mm18G039510;Mm19G041280
GO:0010941	regulation of cell death	21	219	0.0671333	0.491879	Mm02G004039;Mm02G004262;Mm02G005354;Mm02G005371;Mm04G009951;Mm06G016107;Mm07G016721;Mm11G027129;Mm11G027133;Mm11G027473;Mm11G027477;Mm12G028944;Mm13G030562;Mm14G032085;Mm15G034182;Mm16G036446;Mm17G037061;Mm18G039154;Mm19G041066;MmUnG041876;MmUnG043129
GO:0000053	argininosuccinate metabolic process	1	1	0.0676667	0.491879	Mm16G035357
GO:0002101	tRNA wobble cytosine modification	1	1	0.0676667	0.491879	Mm14G033329
GO:0006227	dUDP biosynthetic process	1	1	0.0676667	0.491879	Mm01G002717
GO:0006233	dTDP biosynthetic process	1	1	0.0676667	0.491879	Mm01G002717
GO:0006235	dTTP biosynthetic process	1	1	0.0676667	0.491879	Mm01G002717
GO:0006740	NADPH regeneration	1	1	0.0676667	0.491879	Mm16G036399
GO:0006741	NADP biosynthetic process	1	1	0.0676667	0.491879	Mm12G028741
GO:0007339	binding of sperm to zona pellucida	1	1	0.0676667	0.491879	MmUnG044681
GO:0007455	eye-antennal disc morphogenesis	1	1	0.0676667	0.491879	Mm19G040682
GO:0007469	antennal development	1	1	0.0676667	0.491879	Mm19G040682
GO:0008038	neuron recognition	1	1	0.0676667	0.491879	Mm19G040682
GO:0009115	xanthine catabolic process	1	1	0.0676667	0.491879	Mm14G033093
GO:0009139	pyrimidine nucleoside diphosphate biosynthetic process	1	1	0.0676667	0.491879	Mm01G002717
GO:0009196	pyrimidine deoxyribonucleoside diphosphate metabolic process	1	1	0.0676667	0.491879	Mm01G002717
GO:0009197	pyrimidine deoxyribonucleoside diphosphate biosynthetic process	1	1	0.0676667	0.491879	Mm01G002717
GO:0009212	pyrimidine deoxyribonucleoside triphosphate biosynthetic process	1	1	0.0676667	0.491879	Mm01G002717
GO:0010081	regulation of inflorescence meristem growth	1	1	0.0676667	0.491879	Mm14G032996
GO:0010266	response to vitamin B1	1	1	0.0676667	0.491879	Mm06G013914
GO:0010450	inflorescence meristem growth	1	1	0.0676667	0.491879	Mm14G032996
GO:0010524	positive regulation of calcium ion transport into cytosol	1	1	0.0676667	0.491879	Mm16G036446
GO:0010762	regulation of fibroblast migration	1	1	0.0676667	0.491879	Mm06G015832
GO:0010763	positive regulation of fibroblast migration	1	1	0.0676667	0.491879	Mm06G015832
GO:0010815	bradykinin catabolic process	1	1	0.0676667	0.491879	Mm13G031139
GO:0010992	ubiquitin homeostasis	1	1	0.0676667	0.491879	Mm13G031139
GO:0014717	regulation of satellite cell activation involved in skeletal muscle regeneration	1	1	0.0676667	0.491879	Mm16G036446
GO:0014718	positive regulation of satellite cell activation involved in skeletal muscle regeneration	1	1	0.0676667	0.491879	Mm16G036446
GO:0014719	skeletal muscle satellite cell activation	1	1	0.0676667	0.491879	Mm16G036446
GO:0014850	response to muscle activity	1	1	0.0676667	0.491879	Mm16G036446
GO:0014901	satellite cell activation involved in skeletal muscle regeneration	1	1	0.0676667	0.491879	Mm16G036446
GO:0015751	arabinose transport	1	1	0.0676667	0.491879	Mm12G029137
GO:0015774	polysaccharide transport	1	1	0.0676667	0.491879	Mm10G024748
GO:0015784	GDP-mannose transport	1	1	0.0676667	0.491879	Mm13G030975
GO:0015882	L-ascorbic acid transport	1	1	0.0676667	0.491879	Mm07G019138
GO:0017003	protein-heme linkage	1	1	0.0676667	0.491879	Mm03G006547
GO:0017006	protein-tetrapyrrole linkage	1	1	0.0676667	0.491879	Mm03G006547
GO:0018063	cytochrome c-heme linkage	1	1	0.0676667	0.491879	Mm03G006547
GO:0018131	oxazole or thiazole biosynthetic process	1	1	0.0676667	0.491879	Mm07G017006
GO:0019695	choline metabolic process	1	1	0.0676667	0.491879	Mm14G031738
GO:0022416	chaeta development	1	1	0.0676667	0.491879	Mm19G040682
GO:0030448	hyphal growth	1	1	0.0676667	0.491879	MmUnG045896
GO:0032889	regulation of vacuole fusion, non-autophagic	1	1	0.0676667	0.491879	Mm08G020035
GO:0033137	negative regulation of peptidyl-serine phosphorylation	1	1	0.0676667	0.491879	Mm12G028424
GO:0033139	regulation of peptidyl-serine phosphorylation of STAT protein	1	1	0.0676667	0.491879	Mm12G028424
GO:0033140	negative regulation of peptidyl-serine phosphorylation of STAT protein	1	1	0.0676667	0.491879	Mm12G028424
GO:0033198	response to ATP	1	1	0.0676667	0.491879	Mm06G015832
GO:0034401	chromatin organization involved in regulation of transcription	1	1	0.0676667	0.491879	Mm01G000612
GO:0034770	histone H4-K20 methylation	1	1	0.0676667	0.491879	Mm12G028424
GO:0034773	histone H4-K20 trimethylation	1	1	0.0676667	0.491879	Mm12G028424
GO:0035036	sperm-egg recognition	1	1	0.0676667	0.491879	MmUnG044681
GO:0035214	eye-antennal disc development	1	1	0.0676667	0.491879	Mm19G040682
GO:0035902	response to immobilization stress	1	1	0.0676667	0.491879	Mm06G015832
GO:0036180	filamentous growth of a population of unicellular organisms in response to biotic stimulus	1	1	0.0676667	0.491879	MmUnG045896
GO:0036376	sodium ion export from cell	1	1	0.0676667	0.491879	Mm06G015832
GO:0042425	choline biosynthetic process	1	1	0.0676667	0.491879	Mm14G031738
GO:0042501	serine phosphorylation of STAT protein	1	1	0.0676667	0.491879	Mm12G028424
GO:0042882	L-arabinose transport	1	1	0.0676667	0.491879	Mm12G029137
GO:0043403	skeletal muscle tissue regeneration	1	1	0.0676667	0.491879	Mm16G036446
GO:0043415	positive regulation of skeletal muscle tissue regeneration	1	1	0.0676667	0.491879	Mm16G036446
GO:0043416	regulation of skeletal muscle tissue regeneration	1	1	0.0676667	0.491879	Mm16G036446
GO:0043567	regulation of insulin-like growth factor receptor signaling pathway	1	1	0.0676667	0.491879	Mm02G004262
GO:0043568	positive regulation of insulin-like growth factor receptor signaling pathway	1	1	0.0676667	0.491879	Mm02G004262
GO:0045992	negative regulation of embryonic development	1	1	0.0676667	0.491879	Mm08G020035
GO:0046072	dTDP metabolic process	1	1	0.0676667	0.491879	Mm01G002717
GO:0046075	dTTP metabolic process	1	1	0.0676667	0.491879	Mm01G002717
GO:0046077	dUDP metabolic process	1	1	0.0676667	0.491879	Mm01G002717
GO:0046110	xanthine metabolic process	1	1	0.0676667	0.491879	Mm14G033093
GO:0046484	oxazole or thiazole metabolic process	1	1	0.0676667	0.491879	Mm07G017006
GO:0048009	insulin-like growth factor receptor signaling pathway	1	1	0.0676667	0.491879	Mm02G004262
GO:0048172	regulation of short-term neuronal synaptic plasticity	1	1	0.0676667	0.491879	Mm06G015832
GO:0048800	antennal morphogenesis	1	1	0.0676667	0.491879	Mm19G040682
GO:0051281	positive regulation of release of sequestered calcium ion into cytosol	1	1	0.0676667	0.491879	Mm16G036446
GO:0051391	tRNA acetylation	1	1	0.0676667	0.491879	Mm14G033329
GO:0051469	vesicle fusion with vacuole	1	1	0.0676667	0.491879	Mm08G020035
GO:0052837	thiazole biosynthetic process	1	1	0.0676667	0.491879	Mm07G017006
GO:0052838	thiazole metabolic process	1	1	0.0676667	0.491879	Mm07G017006
GO:0060078	regulation of postsynaptic membrane potential	1	1	0.0676667	0.491879	Mm06G015832
GO:0060291	long-term synaptic potentiation	1	1	0.0676667	0.491879	Mm06G015832
GO:0060567	negative regulation of DNA-templated transcription, termination	1	1	0.0676667	0.491879	Mm16G036544
GO:0070202	regulation of establishment of protein localization to chromosome	1	1	0.0676667	0.491879	MmUnG044681
GO:0070203	regulation of establishment of protein localization to telomere	1	1	0.0676667	0.491879	MmUnG044681
GO:0070593	dendrite self-avoidance	1	1	0.0676667	0.491879	Mm19G040682
GO:0070868	heterochromatin organization involved in chromatin silencing	1	1	0.0676667	0.491879	Mm01G000612
GO:0071320	cellular response to cAMP	1	1	0.0676667	0.491879	Mm06G015832
GO:0071436	sodium ion export	1	1	0.0676667	0.491879	Mm06G015832
GO:0080119	ER body organization	1	1	0.0676667	0.491879	Mm06G015932
GO:0086064	cell communication by electrical coupling involved in cardiac conduction	1	1	0.0676667	0.491879	Mm06G015832
GO:0090083	regulation of inclusion body assembly	1	1	0.0676667	0.491879	Mm09G022499
GO:0090084	negative regulation of inclusion body assembly	1	1	0.0676667	0.491879	Mm09G022499
GO:0090280	positive regulation of calcium ion import	1	1	0.0676667	0.491879	Mm16G036446
GO:0090392	sepal giant cell differentiation	1	1	0.0676667	0.491879	Mm16G036446
GO:0090628	plant epidermal cell fate specification	1	1	0.0676667	0.491879	Mm16G036446
GO:0097242	beta-amyloid clearance	1	1	0.0676667	0.491879	Mm13G031139
GO:0097264	self proteolysis	1	1	0.0676667	0.491879	Mm16G036446
GO:0097549	chromatin organization involved in negative regulation of transcription	1	1	0.0676667	0.491879	Mm01G000612
GO:0098703	calcium ion import across plasma membrane	1	1	0.0676667	0.491879	Mm06G015832
GO:1900049	regulation of histone exchange	1	1	0.0676667	0.491879	Mm01G000612
GO:1901142	insulin metabolic process	1	1	0.0676667	0.491879	Mm13G031139
GO:1901143	insulin catabolic process	1	1	0.0676667	0.491879	Mm13G031139
GO:1901660	calcium ion export	1	1	0.0676667	0.491879	Mm06G015832
GO:1901836	regulation of transcription of nuclear large rRNA transcript from RNA polymerase I promoter	1	1	0.0676667	0.491879	Mm12G028424
GO:1901838	positive regulation of transcription of nuclear large rRNA transcript from RNA polymerase I promoter	1	1	0.0676667	0.491879	Mm12G028424
GO:1904812	rRNA acetylation involved in maturation of SSU-rRNA	1	1	0.0676667	0.491879	Mm14G033329
GO:1904814	regulation of protein localization to chromosome, telomeric region	1	1	0.0676667	0.491879	MmUnG044681
GO:1904816	positive regulation of protein localization to chromosome, telomeric region	1	1	0.0676667	0.491879	MmUnG044681
GO:1904851	positive regulation of establishment of protein localization to telomere	1	1	0.0676667	0.491879	MmUnG044681
GO:1990034	calcium ion export from cell	1	1	0.0676667	0.491879	Mm06G015832
GO:1990035	calcium ion import into cell	1	1	0.0676667	0.491879	Mm06G015832
GO:1990570	GDP-mannose transmembrane transport	1	1	0.0676667	0.491879	Mm13G030975
GO:1990882	rRNA acetylation	1	1	0.0676667	0.491879	Mm14G033329
GO:1990884	RNA acetylation	1	1	0.0676667	0.491879	Mm14G033329
GO:0002009	morphogenesis of an epithelium	6	43	0.067845	0.492006	Mm01G003113;Mm02G003859;Mm05G012770;Mm19G040682;MmUnG041576;MmUnG041859
GO:0008356	asymmetric cell division	5	33	0.0689666	0.492006	Mm01G002930;Mm01G003113;Mm03G006776;MmUnG041859;MmUnG046010
GO:0010183	pollen tube guidance	5	33	0.0689666	0.492006	Mm07G016470;Mm08G019835;Mm14G031738;MmUnG043393;MmUnG045834
GO:0050918	positive chemotaxis	5	33	0.0689666	0.492006	Mm07G016470;Mm08G019835;Mm14G031738;MmUnG043393;MmUnG045834
GO:0042221	response to chemical	301	4140	0.0704065	0.492006	Mm01G000612;Mm01G000619;Mm01G000620;Mm01G001138;Mm01G001318;Mm01G001369;Mm01G001463;Mm01G001472;Mm01G001589;Mm01G001674;Mm01G001837;Mm01G001854;Mm01G002102;Mm01G002176;Mm01G002373;Mm01G002378;Mm01G003281;Mm01G003438;Mm01G003546;Mm01G003560;Mm01G003592;Mm02G003938;Mm02G004048;Mm02G004055;Mm02G004082;Mm02G004133;Mm02G004240;Mm02G004262;Mm02G004473;Mm02G004568;Mm02G004697;Mm02G004928;Mm02G004974;Mm0…
GO:0006857	oligopeptide transport	4	24	0.0751022	0.492006	Mm03G008461;Mm05G012781;Mm06G016166;Mm14G031823
GO:0007602	phototransduction	4	24	0.0751022	0.492006	Mm03G007145;Mm03G008251;Mm08G020935;Mm16G035420
GO:0009585	red, far-red light phototransduction	4	24	0.0751022	0.492006	Mm03G007145;Mm03G008251;Mm08G020935;Mm16G035420
GO:0010440	stomatal lineage progression	4	24	0.0751022	0.492006	Mm06G014139;Mm06G016155;Mm13G031104;MmUnG042686
GO:0016074	snoRNA metabolic process	4	24	0.0751022	0.492006	Mm01G002629;Mm09G022324;Mm14G032473;MmUnG042541
GO:0072531	pyrimidine-containing compound transmembrane transport	4	24	0.0751022	0.492006	Mm05G013588;Mm05G013602;Mm18G039510;MmUnG045880
GO:1901360	organic cyclic compound metabolic process	394	5500	0.075961	0.492006	Mm01G000154;Mm01G000231;Mm01G000274;Mm01G000322;Mm01G000612;Mm01G001057;Mm01G001138;Mm01G001153;Mm01G001346;Mm01G001382;Mm01G001431;Mm01G001432;Mm01G001463;Mm01G001472;Mm01G001484;Mm01G001499;Mm01G001589;Mm01G001674;Mm01G001740;Mm01G001817;Mm01G001818;Mm01G001829;Mm01G001854;Mm01G001862;Mm01G001890;Mm01G002105;Mm01G002243;Mm01G002377;Mm01G002627;Mm01G002629;Mm01G002675;Mm01G002717;Mm01G002848;Mm0…
GO:0045488	pectin metabolic process	8	66	0.076183	0.492006	Mm01G002619;Mm01G002625;Mm01G002627;Mm10G024791;Mm12G028264;Mm14G032476;Mm16G035156;MmUnG042483
GO:0045089	positive regulation of innate immune response	14	136	0.0763201	0.492006	Mm01G003438;Mm02G005848;Mm02G005856;Mm05G013358;Mm06G015812;Mm07G019037;Mm11G025375;Mm12G029054;Mm12G029060;Mm13G031504;Mm14G032821;Mm14G032968;MmUnG042583;MmUnG046263
GO:0006491	N-glycan processing	3	15	0.0763548	0.492006	Mm01G002028;Mm11G025602;Mm11G025662
GO:0010031	circumnutation	3	15	0.0763548	0.492006	Mm03G007145;Mm10G024008;Mm13G030508
GO:0015781	pyrimidine nucleotide-sugar transport	3	15	0.0763548	0.492006	Mm05G013588;Mm05G013602;Mm18G039510
GO:0031126	snoRNA 3'-end processing	3	15	0.0763548	0.492006	Mm01G002629;Mm14G032473;MmUnG042541
GO:0044708	single-organism behavior	3	15	0.0763548	0.492006	Mm01G003113;Mm06G015832;MmUnG041859
GO:0050890	cognition	3	15	0.0763548	0.492006	Mm01G003113;Mm06G015832;MmUnG041859
GO:0055001	muscle cell development	3	15	0.0763548	0.492006	Mm02G003859;Mm06G015873;Mm16G036446
GO:0090481	pyrimidine nucleotide-sugar transmembrane transport	3	15	0.0763548	0.492006	Mm05G013588;Mm05G013602;Mm18G039510
GO:1904064	positive regulation of cation transmembrane transport	3	15	0.0763548	0.492006	Mm06G015873;Mm12G028676;Mm16G036446
GO:0000957	mitochondrial RNA catabolic process	2	7	0.0765124	0.492006	Mm01G001817;Mm14G032085
GO:0007398	ectoderm development	2	7	0.0765124	0.492006	Mm01G003113;MmUnG041859
GO:0007422	peripheral nervous system development	2	7	0.0765124	0.492006	Mm01G003113;MmUnG041859
GO:0007616	long-term memory	2	7	0.0765124	0.492006	Mm01G003113;MmUnG041859
GO:0008052	sensory organ boundary specification	2	7	0.0765124	0.492006	Mm01G003113;MmUnG041859
GO:0010155	regulation of proton transport	2	7	0.0765124	0.492006	Mm03G007350;Mm12G028676
GO:0015785	UDP-galactose transport	2	7	0.0765124	0.492006	Mm05G013588;Mm05G013602
GO:0016360	sensory organ precursor cell fate determination	2	7	0.0765124	0.492006	Mm01G003113;MmUnG041859
GO:0032212	positive regulation of telomere maintenance via telomerase	2	7	0.0765124	0.492006	Mm04G009716;MmUnG044681
GO:0035166	post-embryonic hemopoiesis	2	7	0.0765124	0.492006	Mm01G003113;MmUnG041859
GO:0035167	larval lymph gland hemopoiesis	2	7	0.0765124	0.492006	Mm01G003113;MmUnG041859
GO:0035168	larval lymph gland hemocyte differentiation	2	7	0.0765124	0.492006	Mm01G003113;MmUnG041859
GO:0035171	lamellocyte differentiation	2	7	0.0765124	0.492006	Mm01G003113;MmUnG041859
GO:0035203	regulation of lamellocyte differentiation	2	7	0.0765124	0.492006	Mm01G003113;MmUnG041859
GO:0035204	negative regulation of lamellocyte differentiation	2	7	0.0765124	0.492006	Mm01G003113;MmUnG041859
GO:0042051	compound eye photoreceptor development	2	7	0.0765124	0.492006	Mm01G003113;MmUnG041859
GO:0042386	hemocyte differentiation	2	7	0.0765124	0.492006	Mm01G003113;MmUnG041859
GO:0042387	plasmatocyte differentiation	2	7	0.0765124	0.492006	Mm01G003113;MmUnG041859
GO:0042478	regulation of eye photoreceptor cell development	2	7	0.0765124	0.492006	Mm01G003113;MmUnG041859
GO:0042793	transcription from plastid promoter	2	7	0.0765124	0.492006	Mm03G006451;Mm05G013638
GO:0044033	multi-organism metabolic process	2	7	0.0765124	0.492006	Mm09G022080;Mm11G026491
GO:0045314	regulation of compound eye photoreceptor development	2	7	0.0765124	0.492006	Mm01G003113;MmUnG041859
GO:0045610	regulation of hemocyte differentiation	2	7	0.0765124	0.492006	Mm01G003113;MmUnG041859
GO:0045611	negative regulation of hemocyte differentiation	2	7	0.0765124	0.492006	Mm01G003113;MmUnG041859
GO:0045613	regulation of plasmatocyte differentiation	2	7	0.0765124	0.492006	Mm01G003113;MmUnG041859
GO:0045614	negative regulation of plasmatocyte differentiation	2	7	0.0765124	0.492006	Mm01G003113;MmUnG041859
GO:0045747	positive regulation of Notch signaling pathway	2	7	0.0765124	0.492006	Mm01G003113;MmUnG041859
GO:0046040	IMP metabolic process	2	7	0.0765124	0.492006	Mm02G004473;Mm13G030794
GO:0046532	regulation of photoreceptor cell differentiation	2	7	0.0765124	0.492006	Mm01G003113;MmUnG041859
GO:0048542	lymph gland development	2	7	0.0765124	0.492006	Mm01G003113;MmUnG041859
GO:0060582	cell fate determination involved in pattern specification	2	7	0.0765124	0.492006	Mm01G003113;MmUnG041859
GO:0071497	cellular response to freezing	2	7	0.0765124	0.492006	Mm12G028264;MmUnG042483
GO:0072334	UDP-galactose transmembrane transport	2	7	0.0765124	0.492006	Mm05G013588;Mm05G013602
GO:0089722	phosphoenolpyruvate transmembrane transport	2	7	0.0765124	0.492006	Mm03G008128;Mm03G008130
GO:0097191	extrinsic apoptotic signaling pathway	2	7	0.0765124	0.492006	Mm02G004262;Mm07G016721
GO:1901999	homogentisate metabolic process	2	7	0.0765124	0.492006	MmUnG045871;MmUnG045872
GO:1902000	homogentisate catabolic process	2	7	0.0765124	0.492006	MmUnG045871;MmUnG045872
GO:1904358	positive regulation of telomere maintenance via telomere lengthening	2	7	0.0765124	0.492006	Mm04G009716;MmUnG044681
GO:2000014	regulation of endosperm development	2	7	0.0765124	0.492006	Mm07G018726;Mm16G036446
GO:2001236	regulation of extrinsic apoptotic signaling pathway	2	7	0.0765124	0.492006	Mm02G004262;Mm07G016721
GO:0006810	transport	195	2627	0.0774491	0.497118	Mm01G000443;Mm01G001369;Mm01G001589;Mm01G001899;Mm01G001946;Mm01G003425;Mm02G004048;Mm02G004055;Mm02G004082;Mm02G004133;Mm02G004262;Mm02G004959;Mm02G004960;Mm02G004974;Mm02G005067;Mm02G005075;Mm02G005077;Mm02G005411;Mm02G005700;Mm02G005759;Mm02G005961;Mm02G006026;Mm02G006073;Mm02G006308;Mm03G006808;Mm03G007066;Mm03G007170;Mm03G007350;Mm03G007357;Mm03G008128;Mm03G008130;Mm03G008461;Mm04G008790;Mm0…
GO:0035266	meristem growth	11	101	0.079186	0.50734	Mm01G002930;Mm06G014089;Mm06G015343;Mm08G020086;Mm09G023354;Mm13G031020;Mm14G032996;Mm17G037509;Mm18G039484;MmUnG044386;MmUnG046010
GO:0048729	tissue morphogenesis	6	45	0.0810501	0.518315	Mm01G003113;Mm02G003859;Mm05G012770;Mm19G040682;MmUnG041576;MmUnG041859
GO:0016072	rRNA metabolic process	19	199	0.0811943	0.518315	Mm01G001382;Mm01G002629;Mm02G005022;Mm02G006265;Mm03G006735;Mm03G008528;Mm04G009951;Mm09G022324;Mm11G026575;Mm11G027001;Mm14G032473;Mm14G033329;Mm16G035507;Mm19G041397;Mm19G041401;MmUnG042541;MmUnG043328;MmUnG045042;MmUnG045396
GO:0010449	root meristem growth	7	56	0.082275	0.524261	Mm06G014089;Mm06G015343;Mm09G023354;Mm13G031020;Mm14G032996;Mm17G037509;MmUnG044386
GO:0003333	amino acid transmembrane transport	11	102	0.0836233	0.529967	Mm02G005759;Mm03G007066;Mm05G012466;Mm05G012498;Mm08G020616;Mm08G020619;Mm11G026482;Mm15G034473;Mm17G036778;MmUnG043068;MmUnG043177
GO:0006865	amino acid transport	11	102	0.0836233	0.529967	Mm02G005759;Mm03G007066;Mm05G012466;Mm05G012498;Mm08G020616;Mm08G020619;Mm11G026482;Mm15G034473;Mm17G036778;MmUnG043068;MmUnG043177
GO:2000028	regulation of photoperiodism, flowering	11	102	0.0836233	0.529967	Mm04G009764;Mm07G016671;Mm07G018726;Mm11G026542;Mm11G027133;Mm11G027583;Mm11G027600;Mm16G035189;MmUnG042784;MmUnG044145;MmUnG045156
GO:0009583	detection of light stimulus	4	25	0.0848365	0.536687	Mm03G007145;Mm03G008251;Mm08G020935;Mm16G035420
GO:0045087	innate immune response	46	554	0.0864861	0.546138	Mm01G002378;Mm01G003438;Mm02G004662;Mm02G005848;Mm02G005856;Mm03G008285;Mm04G008930;Mm04G009134;Mm04G009135;Mm04G009657;Mm05G013358;Mm06G015812;Mm07G018847;Mm07G019037;Mm10G024617;Mm10G025034;Mm11G025375;Mm12G028226;Mm12G028264;Mm12G028371;Mm12G028404;Mm12G029054;Mm12G029060;Mm13G030562;Mm13G031504;Mm14G032251;Mm14G032580;Mm14G032821;Mm14G032968;Mm17G036675;Mm17G036912;Mm17G037061;Mm17G038062;Mm1…
GO:0044765	single-organism transport	182	2453	0.0876303	0.55237	Mm01G000443;Mm01G001369;Mm01G001589;Mm01G001899;Mm01G001946;Mm01G003425;Mm02G004048;Mm02G004055;Mm02G004082;Mm02G004133;Mm02G004262;Mm02G004959;Mm02G004960;Mm02G004974;Mm02G005067;Mm02G005075;Mm02G005077;Mm02G005411;Mm02G005700;Mm02G005759;Mm02G005961;Mm02G006026;Mm02G006073;Mm02G006308;Mm03G006808;Mm03G007066;Mm03G007170;Mm03G007350;Mm03G007357;Mm03G008128;Mm03G008130;Mm03G008461;Mm04G008790;Mm0…
GO:0000060	protein import into nucleus, translocation	3	16	0.0894318	0.555744	Mm01G001369;Mm04G010171;Mm08G021065
GO:0002165	instar larval or pupal development	3	16	0.0894318	0.555744	Mm01G003113;Mm19G040682;MmUnG041859
GO:0007187	G-protein coupled receptor signaling pathway, coupled to cyclic nucleotide second messenger	3	16	0.0894318	0.555744	Mm04G009866;Mm04G009888;Mm16G035732
GO:0007188	adenylate cyclase-modulating G-protein coupled receptor signaling pathway	3	16	0.0894318	0.555744	Mm04G009866;Mm04G009888;Mm16G035732
GO:0009700	indole phytoalexin biosynthetic process	3	16	0.0894318	0.555744	Mm03G008617;Mm06G016121;Mm13G031123
GO:0019919	peptidyl-arginine methylation, to asymmetrical-dimethyl arginine	3	16	0.0894318	0.555744	Mm04G011190;Mm09G023226;Mm11G025911
GO:0046217	indole phytoalexin metabolic process	3	16	0.0894318	0.555744	Mm03G008617;Mm06G016121;Mm13G031123
GO:0050879	multicellular organismal movement	3	16	0.0894318	0.555744	Mm03G007145;Mm10G024008;Mm13G030508
GO:0009826	unidimensional cell growth	34	397	0.0925843	0.571155	Mm01G002008;Mm01G002619;Mm01G002625;Mm02G005975;Mm03G006505;Mm03G007145;Mm04G010289;Mm05G012054;Mm05G012370;Mm05G013158;Mm06G016256;Mm07G016854;Mm07G017201;Mm07G017726;Mm07G018468;Mm08G019835;Mm08G019998;Mm08G019999;Mm08G020004;Mm11G026999;Mm14G031738;Mm14G032476;Mm14G033453;Mm15G034293;Mm15G034305;Mm16G036220;Mm16G036458;Mm19G040046;Mm19G041005;Mm19G041159;MmUnG041576;MmUnG042665;MmUnG043393;MmU…
GO:0009736	cytokinin-activated signaling pathway	11	104	0.0929503	0.571155	Mm06G014089;Mm06G014476;Mm06G015343;Mm06G015497;Mm09G022819;Mm09G023354;Mm13G031020;Mm14G032085;Mm17G037509;Mm18G039484;MmUnG044386
GO:0006869	lipid transport	12	116	0.0930026	0.571155	Mm07G017309;Mm08G019412;Mm08G019827;Mm09G022612;Mm13G029853;Mm13G030878;Mm13G030910;Mm19G040551;Mm19G040966;Mm19G041282;MmUnG042654;MmUnG045114
GO:0015980	energy derivation by oxidation of organic compounds	12	116	0.0930026	0.571155	Mm01G003560;Mm04G009951;Mm07G018226;Mm07G018703;Mm08G019669;Mm08G020226;Mm11G026864;Mm12G029280;Mm17G037351;Mm18G039163;Mm19G040452;MmUnG045097
GO:0006626	protein targeting to mitochondrion	5	36	0.0930506	0.571155	Mm02G004082;Mm02G004133;Mm13G029855;Mm13G031168;Mm16G036580
GO:0070585	protein localization to mitochondrion	5	36	0.0930506	0.571155	Mm02G004082;Mm02G004133;Mm13G029855;Mm13G031168;Mm16G036580
GO:0072655	establishment of protein localization to mitochondrion	5	36	0.0930506	0.571155	Mm02G004082;Mm02G004133;Mm13G029855;Mm13G031168;Mm16G036580
GO:0006855	drug transmembrane transport	15	153	0.0944475	0.572527	Mm01G001589;Mm02G004974;Mm02G005067;Mm05G012618;Mm06G015841;Mm08G020616;Mm08G020619;Mm12G029507;Mm14G032114;Mm16G035128;Mm17G036778;Mm19G041280;Mm19G041282;MmUnG044307;MmUnG045880
GO:0005977	glycogen metabolic process	4	26	0.0951514	0.572527	Mm01G003560;Mm07G018226;Mm08G020226;Mm17G037351
GO:0006112	energy reserve metabolic process	4	26	0.0951514	0.572527	Mm01G003560;Mm07G018226;Mm08G020226;Mm17G037351
GO:0016073	snRNA metabolic process	4	26	0.0951514	0.572527	Mm01G002629;Mm06G015719;Mm14G032473;MmUnG042541
GO:0006900	membrane budding	6	47	0.0955835	0.572527	Mm08G019412;Mm08G019827;Mm09G022612;Mm13G029853;MmUnG042654;MmUnG045114
GO:1902591	single-organism membrane budding	6	47	0.0955835	0.572527	Mm08G019412;Mm08G019827;Mm09G022612;Mm13G029853;MmUnG042654;MmUnG045114
GO:0006364	rRNA processing	18	191	0.0963793	0.572527	Mm01G001382;Mm01G002629;Mm02G005022;Mm02G006265;Mm03G006735;Mm03G008528;Mm09G022324;Mm11G026575;Mm11G027001;Mm14G032473;Mm14G033329;Mm16G035507;Mm19G041397;Mm19G041401;MmUnG042541;MmUnG043328;MmUnG045042;MmUnG045396
GO:0001745	compound eye morphogenesis	2	8	0.0975595	0.572527	Mm01G003113;MmUnG041859
GO:0001751	compound eye photoreceptor cell differentiation	2	8	0.0975595	0.572527	Mm01G003113;MmUnG041859
GO:0006526	arginine biosynthetic process	2	8	0.0975595	0.572527	Mm02G005760;Mm16G035357
GO:0008593	regulation of Notch signaling pathway	2	8	0.0975595	0.572527	Mm01G003113;MmUnG041859
GO:0009303	rRNA transcription	2	8	0.0975595	0.572527	Mm04G009951;Mm12G028424
GO:0010113	negative regulation of systemic acquired resistance	2	8	0.0975595	0.572527	Mm18G039051;Mm18G039057
GO:0019079	viral genome replication	2	8	0.0975595	0.572527	Mm09G022080;Mm11G026491
GO:0030239	myofibril assembly	2	8	0.0975595	0.572527	Mm02G003859;Mm16G036446
GO:0030718	germ-line stem cell population maintenance	2	8	0.0975595	0.572527	Mm01G003113;MmUnG041859
GO:0031032	actomyosin structure organization	2	8	0.0975595	0.572527	Mm02G003859;Mm16G036446
GO:0034397	telomere localization	2	8	0.0975595	0.572527	Mm04G010461;Mm04G010487
GO:0034398	telomere tethering at nuclear periphery	2	8	0.0975595	0.572527	Mm04G010461;Mm04G010487
GO:0045214	sarcomere organization	2	8	0.0975595	0.572527	Mm02G003859;Mm16G036446
GO:0048749	compound eye development	2	8	0.0975595	0.572527	Mm01G003113;MmUnG041859
GO:0060581	cell fate commitment involved in pattern specification	2	8	0.0975595	0.572527	Mm01G003113;MmUnG041859
GO:0090435	protein localization to nuclear envelope	2	8	0.0975595	0.572527	Mm04G010461;Mm04G010487
GO:1903513	endoplasmic reticulum to cytosol transport	2	8	0.0975595	0.572527	Mm06G015832;Mm06G015873
GO:1903707	negative regulation of hemopoiesis	2	8	0.0975595	0.572527	Mm01G003113;MmUnG041859
GO:2001234	negative regulation of apoptotic signaling pathway	2	8	0.0975595	0.572527	Mm02G004262;Mm07G016721
GO:0009627	systemic acquired resistance	11	105	0.09784	0.572527	Mm01G003438;Mm10G024617;Mm10G025034;Mm13G030562;Mm13G031504;Mm14G032821;Mm14G032968;Mm18G039051;Mm18G039057;MmUnG042583;MmUnG043085
GO:0071368	cellular response to cytokinin stimulus	11	105	0.09784	0.572527	Mm06G014089;Mm06G014476;Mm06G015343;Mm06G015497;Mm09G022819;Mm09G023354;Mm13G031020;Mm14G032085;Mm17G037509;Mm18G039484;MmUnG044386
GO:0010393	galacturonan metabolic process	8	70	0.0994185	0.580796	Mm01G002619;Mm01G002625;Mm01G002627;Mm10G024791;Mm12G028264;Mm14G032476;Mm16G035156;MmUnG042483
GO:0051234	establishment of localization	197	2680	0.100299	0.584966	Mm01G000443;Mm01G001369;Mm01G001589;Mm01G001899;Mm01G001946;Mm01G003425;Mm02G004048;Mm02G004055;Mm02G004082;Mm02G004133;Mm02G004262;Mm02G004959;Mm02G004960;Mm02G004974;Mm02G005067;Mm02G005075;Mm02G005077;Mm02G005411;Mm02G005700;Mm02G005759;Mm02G005961;Mm02G006026;Mm02G006073;Mm02G006308;Mm03G006808;Mm03G007066;Mm03G007170;Mm03G007350;Mm03G007357;Mm03G008128;Mm03G008130;Mm03G008461;Mm04G008790;Mm0…
GO:0071230	cellular response to amino acid stimulus	5	37	0.10192	0.593013	Mm01G001369;Mm02G004048;Mm02G004055;Mm02G004697;Mm07G017838
GO:0009060	aerobic respiration	7	59	0.102084	0.593013	Mm07G018703;Mm08G019669;Mm11G026864;Mm12G029280;Mm18G039163;Mm19G040452;MmUnG045097
GO:0006890	retrograde vesicle-mediated transport, Golgi to ER	6	48	0.103338	0.593013	Mm02G004959;Mm02G004960;Mm02G005075;Mm02G005077;Mm02G005961;Mm17G036760
GO:0015914	phospholipid transport	6	48	0.103338	0.593013	Mm08G019412;Mm08G019827;Mm09G022612;Mm13G029853;MmUnG042654;MmUnG045114
GO:0006825	copper ion transport	3	17	0.103368	0.593013	Mm08G021629;Mm12G028676;Mm16G035376
GO:0043144	snoRNA processing	3	17	0.103368	0.593013	Mm01G002629;Mm14G032473;MmUnG042541
GO:0046113	nucleobase catabolic process	3	17	0.103368	0.593013	Mm02G003796;Mm04G010064;Mm14G033093
GO:0052555	positive regulation by organism of immune response of other organism involved in symbiotic interaction	3	17	0.103368	0.593013	Mm02G005848;Mm02G005856;Mm06G015812
GO:0052556	positive regulation by symbiont of host immune response	3	17	0.103368	0.593013	Mm02G005848;Mm02G005856;Mm06G015812
GO:2000573	positive regulation of DNA biosynthetic process	3	17	0.103368	0.593013	Mm02G005361;Mm04G009716;MmUnG044681
GO:0002683	negative regulation of immune system process	8	71	0.105787	0.599991	Mm01G003113;Mm11G027133;Mm17G037061;Mm17G038062;Mm18G039051;Mm18G039057;Mm19G041016;MmUnG041859
GO:0070085	glycosylation	13	131	0.105965	0.599991	Mm01G002028;Mm04G009716;Mm05G013153;Mm07G019154;Mm11G025602;Mm11G025662;Mm11G025997;Mm12G029054;Mm12G029060;Mm18G039484;MmUnG042136;MmUnG042205;MmUnG045406
GO:0009084	glutamine family amino acid biosynthetic process	4	27	0.106024	0.599991	Mm02G005760;Mm03G008617;Mm14G033462;Mm16G035357
GO:0002218	activation of innate immune response	10	95	0.108296	0.599991	Mm01G003438;Mm05G013358;Mm11G025375;Mm12G029054;Mm12G029060;Mm13G031504;Mm14G032821;Mm14G032968;MmUnG042583;MmUnG046263
GO:0006811	ion transport	87	1130	0.109607	0.599991	Mm01G000443;Mm01G001589;Mm01G001946;Mm02G004048;Mm02G004055;Mm02G004974;Mm02G005067;Mm02G005759;Mm02G006026;Mm03G007066;Mm03G007170;Mm03G007350;Mm03G008128;Mm03G008130;Mm04G008790;Mm04G008795;Mm04G008907;Mm04G009094;Mm04G009349;Mm04G009439;Mm04G009657;Mm05G012466;Mm05G012498;Mm05G012618;Mm05G013588;Mm05G013602;Mm06G015832;Mm06G015873;Mm07G016854;Mm07G017309;Mm07G017654;Mm07G017682;Mm07G017838;Mm0…
GO:0010959	regulation of metal ion transport	5	38	0.111194	0.599991	Mm01G001946;Mm06G015832;Mm06G015873;Mm09G022819;Mm16G036446
GO:0030104	water homeostasis	5	38	0.111194	0.599991	Mm08G019998;Mm08G019999;Mm08G020004;Mm14G033426;Mm16G036220
GO:0051668	localization within membrane	6	49	0.11141	0.599991	Mm08G019412;Mm08G019827;Mm09G022612;Mm13G029853;MmUnG042654;MmUnG045114
GO:0030182	neuron differentiation	8	72	0.112376	0.599991	Mm01G000612;Mm01G001432;Mm01G003113;Mm07G017418;Mm11G026595;Mm16G036093;Mm19G040682;MmUnG041859
GO:0000041	transition metal ion transport	11	108	0.113409	0.599991	Mm02G006026;Mm03G007170;Mm04G009439;Mm05G012618;Mm07G017654;Mm07G017682;Mm07G018241;Mm08G021629;Mm09G022819;Mm12G028676;Mm16G035376
GO:0016049	cell growth	51	635	0.113708	0.599991	Mm01G001499;Mm01G002008;Mm01G002619;Mm01G002625;Mm02G004697;Mm02G005975;Mm03G006505;Mm03G007145;Mm04G010289;Mm05G012054;Mm05G012370;Mm05G012914;Mm05G013153;Mm05G013158;Mm06G016256;Mm07G016854;Mm07G017201;Mm07G017726;Mm07G018468;Mm08G019835;Mm08G019998;Mm08G019999;Mm08G020004;Mm11G026595;Mm11G026758;Mm11G026760;Mm11G026761;Mm11G026762;Mm11G026999;Mm11G027133;Mm13G030511;Mm13G030519;Mm14G031635;Mm1…
GO:0071395	cellular response to jasmonic acid stimulus	17	183	0.11427	0.599991	Mm01G003438;Mm02G003938;Mm03G007413;Mm04G009284;Mm11G025375;Mm12G028492;Mm12G029243;Mm13G031504;Mm14G032821;Mm14G032968;Mm15G034997;Mm17G036706;Mm19G040227;MmUnG042583;MmUnG043085;MmUnG045977;MmUnG046263
GO:0030001	metal ion transport	38	460	0.116597	0.599991	Mm01G000443;Mm01G001946;Mm02G004048;Mm02G004055;Mm02G006026;Mm03G007170;Mm04G008790;Mm04G008795;Mm04G009349;Mm04G009439;Mm04G009657;Mm05G012618;Mm06G015832;Mm06G015873;Mm07G017654;Mm07G017682;Mm07G017838;Mm07G018241;Mm08G021629;Mm09G022819;Mm10G025057;Mm12G028676;Mm12G029210;Mm12G029486;Mm14G032807;Mm14G033555;Mm15G034182;Mm16G035376;Mm16G036446;Mm17G037647;Mm18G038744;Mm19G040611;Mm19G041282;MmU…
GO:0097237	cellular response to toxic substance	21	235	0.116787	0.599991	Mm01G002176;Mm01G002378;Mm01G003438;Mm05G013358;Mm08G020143;Mm08G020826;Mm11G026259;Mm12G028264;Mm13G031504;Mm14G032251;Mm14G032821;Mm14G032968;Mm15G034997;Mm18G039154;MmUnG042483;MmUnG042583;MmUnG042945;MmUnG043085;MmUnG043393;MmUnG044674;MmUnG045834
GO:1903309	negative regulation of chromatin modification	4	28	0.117431	0.599991	Mm05G013158;Mm07G017240;Mm18G039051;Mm18G039057
GO:0009610	response to symbiotic fungus	3	18	0.118095	0.599991	Mm03G006667;Mm09G022863;Mm11G026955
GO:0010048	vernalization response	3	18	0.118095	0.599991	Mm04G009308;Mm11G025949;MmUnG046280
GO:0046864	isoprenoid transport	3	18	0.118095	0.599991	Mm19G040551;Mm19G040966;Mm19G041282
GO:0046865	terpenoid transport	3	18	0.118095	0.599991	Mm19G040551;Mm19G040966;Mm19G041282
GO:0046886	positive regulation of hormone biosynthetic process	3	18	0.118095	0.599991	Mm02G004662;Mm08G020698;Mm08G021642
GO:0070816	phosphorylation of RNA polymerase II C-terminal domain	3	18	0.118095	0.599991	Mm06G016083;Mm17G037550;MmUnG041650
GO:0080168	abscisic acid transport	3	18	0.118095	0.599991	Mm19G040551;Mm19G040966;Mm19G041282
GO:0006862	nucleotide transport	8	73	0.119181	0.599991	Mm01G001589;Mm02G004974;Mm02G005067;Mm05G013588;Mm05G013602;Mm13G030975;Mm18G039510;Mm19G041280
GO:0048574	long-day photoperiodism, flowering	8	73	0.119181	0.599991	Mm04G009764;Mm07G016671;Mm11G026542;Mm11G027583;Mm11G027600;Mm16G035189;MmUnG042784;MmUnG044145
GO:0043901	negative regulation of multi-organism process	6	50	0.119793	0.599991	Mm02G006288;Mm14G032227;Mm18G039051;Mm18G039057;Mm18G039716;Mm19G041016
GO:0002084	protein depalmitoylation	2	9	0.119988	0.599991	Mm16G036093;MmUnG043129
GO:0002164	larval development	2	9	0.119988	0.599991	Mm01G003113;MmUnG041859
GO:0006208	pyrimidine nucleobase catabolic process	2	9	0.119988	0.599991	Mm02G003796;Mm04G010064
GO:0006212	uracil catabolic process	2	9	0.119988	0.599991	Mm02G003796;Mm04G010064
GO:0006801	superoxide metabolic process	2	9	0.119988	0.599991	Mm08G020826;Mm14G033093
GO:0007219	Notch signaling pathway	2	9	0.119988	0.599991	Mm01G003113;MmUnG041859
GO:0015729	oxaloacetate transport	2	9	0.119988	0.599991	Mm14G032114;Mm16G035128
GO:0019860	uracil metabolic process	2	9	0.119988	0.599991	Mm02G003796;Mm04G010064
GO:0021953	central nervous system neuron differentiation	2	9	0.119988	0.599991	Mm01G001432;Mm07G017418
GO:0042159	lipoprotein catabolic process	2	9	0.119988	0.599991	Mm16G036093;MmUnG043129
GO:0042461	photoreceptor cell development	2	9	0.119988	0.599991	Mm01G003113;MmUnG041859
GO:0042462	eye photoreceptor cell development	2	9	0.119988	0.599991	Mm01G003113;MmUnG041859
GO:0098734	macromolecule depalmitoylation	2	9	0.119988	0.599991	Mm16G036093;MmUnG043129
GO:1900871	chloroplast mRNA modification	2	9	0.119988	0.599991	Mm09G022397;Mm09G022426
GO:1902356	oxaloacetate(2-) transmembrane transport	2	9	0.119988	0.599991	Mm14G032114;Mm16G035128
GO:2000769	regulation of establishment or maintenance of cell polarity regulating cell shape	2	9	0.119988	0.599991	Mm04G010461;Mm04G010487
GO:0015893	drug transport	15	159	0.120075	0.599991	Mm01G001589;Mm02G004974;Mm02G005067;Mm05G012618;Mm06G015841;Mm08G020616;Mm08G020619;Mm12G029507;Mm14G032114;Mm16G035128;Mm17G036778;Mm19G041280;Mm19G041282;MmUnG044307;MmUnG045880
GO:0040008	regulation of growth	29	341	0.120247	0.599991	Mm01G002930;Mm02G004262;Mm02G004697;Mm03G007377;Mm05G012914;Mm06G014089;Mm06G015343;Mm06G016225;Mm07G016854;Mm07G018468;Mm08G020086;Mm09G023354;Mm11G026595;Mm11G026760;Mm11G026761;Mm11G026762;Mm13G031020;Mm14G031635;Mm14G032085;Mm14G032996;Mm16G036446;Mm17G037509;Mm18G039484;Mm19G041397;Mm19G041401;MmUnG043393;MmUnG044386;MmUnG045834;MmUnG046010
GO:0006220	pyrimidine nucleotide metabolic process	5	39	0.120859	0.599991	Mm01G002717;Mm04G009546;Mm07G016579;Mm15G033964;Mm19G039901
GO:0008645	hexose transport	5	39	0.120859	0.599991	Mm04G009094;Mm07G019324;Mm12G029137;Mm18G038806;MmUnG044154
GO:0015758	glucose transport	5	39	0.120859	0.599991	Mm04G009094;Mm07G019324;Mm12G029137;Mm18G038806;MmUnG044154
GO:0035428	hexose transmembrane transport	5	39	0.120859	0.599991	Mm04G009094;Mm07G019324;Mm12G029137;Mm18G038806;MmUnG044154
GO:0045824	negative regulation of innate immune response	5	39	0.120859	0.599991	Mm17G037061;Mm17G038062;Mm18G039051;Mm18G039057;Mm19G041016
GO:0046323	glucose import	5	39	0.120859	0.599991	Mm04G009094;Mm07G019324;Mm12G029137;Mm18G038806;MmUnG044154
GO:1904659	glucose transmembrane transport	5	39	0.120859	0.599991	Mm04G009094;Mm07G019324;Mm12G029137;Mm18G038806;MmUnG044154
GO:0009867	jasmonic acid mediated signaling pathway	16	172	0.121574	0.599991	Mm01G003438;Mm02G003938;Mm03G007413;Mm04G009284;Mm11G025375;Mm12G028492;Mm12G029243;Mm13G031504;Mm14G032821;Mm14G032968;Mm17G036706;Mm19G040227;MmUnG042583;MmUnG043085;MmUnG045977;MmUnG046263
GO:0006935	chemotaxis	7	62	0.124245	0.599991	Mm01G000612;Mm07G016470;Mm08G019835;Mm14G031738;Mm16G036093;MmUnG043393;MmUnG045834
GO:0010043	response to zinc ion	7	62	0.124245	0.599991	Mm01G002176;Mm03G007170;Mm07G017654;Mm07G017682;Mm19G040424;MmUnG042945;MmUnG044674
GO:1902578	single-organism localization	185	2531	0.126027	0.599991	Mm01G000443;Mm01G001369;Mm01G001589;Mm01G001899;Mm01G001946;Mm01G003425;Mm02G004048;Mm02G004055;Mm02G004082;Mm02G004133;Mm02G004262;Mm02G004959;Mm02G004960;Mm02G004974;Mm02G005067;Mm02G005075;Mm02G005077;Mm02G005411;Mm02G005700;Mm02G005759;Mm02G005961;Mm02G006026;Mm02G006073;Mm02G006308;Mm03G006808;Mm03G007066;Mm03G007170;Mm03G007350;Mm03G007357;Mm03G008128;Mm03G008130;Mm03G008461;Mm04G008790;Mm0…
GO:0010483	pollen tube reception	4	29	0.129343	0.599991	Mm11G026760;Mm11G026761;Mm11G026762;Mm11G026998
GO:0052325	cell wall pectin biosynthetic process	4	29	0.129343	0.599991	Mm01G002619;Mm01G002625;Mm14G032476;Mm16G035156
GO:0006753	nucleoside phosphate metabolic process	28	331	0.130756	0.599991	Mm01G001463;Mm01G001472;Mm01G002717;Mm01G002957;Mm02G003744;Mm02G004473;Mm02G004928;Mm03G006888;Mm04G009452;Mm04G009546;Mm04G009716;Mm06G015411;Mm07G016579;Mm07G016630;Mm08G019669;Mm09G023196;Mm11G025987;Mm12G028604;Mm12G028741;Mm13G030794;Mm15G033964;Mm16G036399;Mm16G036539;Mm18G039163;Mm19G039901;Mm19G040452;MmUnG045529;MmUnG045936
GO:0000025	maltose catabolic process	1	2	0.130759	0.599991	Mm17G037351
GO:0000354	cis assembly of pre-catalytic spliceosome	1	2	0.130759	0.599991	MmUnG041917
GO:0000722	telomere maintenance via recombination	1	2	0.130759	0.599991	Mm16G036539
GO:0000958	mitochondrial mRNA catabolic process	1	2	0.130759	0.599991	Mm14G032085
GO:0000965	mitochondrial RNA 3'-end processing	1	2	0.130759	0.599991	Mm14G032085
GO:0001881	receptor recycling	1	2	0.130759	0.599991	Mm12G027798
GO:0006106	fumarate metabolic process	1	2	0.130759	0.599991	Mm07G018703
GO:0006420	arginyl-tRNA aminoacylation	1	2	0.130759	0.599991	MmUnG044952
GO:0006428	isoleucyl-tRNA aminoacylation	1	2	0.130759	0.599991	Mm11G025626
GO:0006761	dihydrofolate biosynthetic process	1	2	0.130759	0.599991	MmUnG044342
GO:0007259	JAK-STAT cascade	1	2	0.130759	0.599991	Mm12G028424
GO:0008206	bile acid metabolic process	1	2	0.130759	0.599991	Mm07G017418
GO:0008612	peptidyl-lysine modification to peptidyl-hypusine	1	2	0.130759	0.599991	Mm13G031309
GO:0009138	pyrimidine nucleoside diphosphate metabolic process	1	2	0.130759	0.599991	Mm01G002717
GO:0009662	etioplast organization	1	2	0.130759	0.599991	Mm05G013638
GO:0010028	xanthophyll cycle	1	2	0.130759	0.599991	Mm07G019138
GO:0010220	positive regulation of vernalization response	1	2	0.130759	0.599991	Mm04G009308
GO:0010274	hydrotropism	1	2	0.130759	0.599991	MmUnG041576
GO:0010618	aerenchyma formation	1	2	0.130759	0.599991	Mm13G030562
GO:0010761	fibroblast migration	1	2	0.130759	0.599991	Mm06G015832
GO:0010835	regulation of protein ADP-ribosylation	1	2	0.130759	0.599991	Mm04G009716
GO:0010836	negative regulation of protein ADP-ribosylation	1	2	0.130759	0.599991	Mm04G009716
GO:0014823	response to activity	1	2	0.130759	0.599991	Mm16G036446
GO:0015680	intracellular copper ion transport	1	2	0.130759	0.599991	Mm12G028676
GO:0016080	synaptic vesicle targeting	1	2	0.130759	0.599991	Mm03G007357
GO:0016081	synaptic vesicle docking	1	2	0.130759	0.599991	Mm03G007357
GO:0019276	UDP-N-acetylgalactosamine metabolic process	1	2	0.130759	0.599991	Mm01G001431
GO:0030857	negative regulation of epithelial cell differentiation	1	2	0.130759	0.599991	Mm18G039716
GO:0031149	sorocarp stalk cell differentiation	1	2	0.130759	0.599991	Mm18G039716
GO:0031150	sorocarp stalk development	1	2	0.130759	0.599991	Mm18G039716
GO:0031285	regulation of sorocarp stalk cell differentiation	1	2	0.130759	0.599991	Mm18G039716
GO:0031286	negative regulation of sorocarp stalk cell differentiation	1	2	0.130759	0.599991	Mm18G039716
GO:0031542	positive regulation of anthocyanin biosynthetic process	1	2	0.130759	0.599991	Mm17G036706
GO:0031554	regulation of DNA-templated transcription, termination	1	2	0.130759	0.599991	Mm16G036544
GO:0031848	protection from non-homologous end joining at telomere	1	2	0.130759	0.599991	MmUnG043011
GO:0032105	negative regulation of response to extracellular stimulus	1	2	0.130759	0.599991	Mm18G039716
GO:0032108	negative regulation of response to nutrient levels	1	2	0.130759	0.599991	Mm18G039716
GO:0032459	regulation of protein oligomerization	1	2	0.130759	0.599991	Mm13G031139
GO:0032461	positive regulation of protein oligomerization	1	2	0.130759	0.599991	Mm13G031139
GO:0032640	tumor necrosis factor production	1	2	0.130759	0.599991	Mm12G027798
GO:0032680	regulation of tumor necrosis factor production	1	2	0.130759	0.599991	Mm12G027798
GO:0032760	positive regulation of tumor necrosis factor production	1	2	0.130759	0.599991	Mm12G027798
GO:0034498	early endosome to Golgi transport	1	2	0.130759	0.599991	Mm04G009672
GO:0035315	hair cell differentiation	1	2	0.130759	0.599991	Mm19G040682
GO:0035316	non-sensory hair organization	1	2	0.130759	0.599991	Mm19G040682
GO:0035317	imaginal disc-derived wing hair organization	1	2	0.130759	0.599991	Mm19G040682
GO:0035884	arabinan biosynthetic process	1	2	0.130759	0.599991	Mm10G024791
GO:0035945	mitochondrial ncRNA surveillance	1	2	0.130759	0.599991	Mm14G032085
GO:0035946	mitochondrial mRNA surveillance	1	2	0.130759	0.599991	Mm14G032085
GO:0042246	tissue regeneration	1	2	0.130759	0.599991	Mm16G036446
GO:0042554	superoxide anion generation	1	2	0.130759	0.599991	Mm14G033093
GO:0043007	maintenance of rDNA	1	2	0.130759	0.599991	Mm01G000612
GO:0045471	response to ethanol	1	2	0.130759	0.599991	Mm01G003281
GO:0045881	positive regulation of sporulation resulting in formation of a cellular spore	1	2	0.130759	0.599991	Mm18G039716
GO:0046425	regulation of JAK-STAT cascade	1	2	0.130759	0.599991	Mm12G028424
GO:0046452	dihydrofolate metabolic process	1	2	0.130759	0.599991	MmUnG044342
GO:0048814	regulation of dendrite morphogenesis	1	2	0.130759	0.599991	Mm19G040682
GO:0051211	anisotropic cell growth	1	2	0.130759	0.599991	Mm11G027133
GO:0060051	negative regulation of protein glycosylation	1	2	0.130759	0.599991	Mm04G009716
GO:0060178	regulation of exocyst localization	1	2	0.130759	0.599991	Mm15G033828
GO:0070125	mitochondrial translational elongation	1	2	0.130759	0.599991	Mm12G028753
GO:0070199	establishment of protein localization to chromosome	1	2	0.130759	0.599991	MmUnG044681
GO:0070200	establishment of protein localization to telomere	1	2	0.130759	0.599991	MmUnG044681
GO:0070542	response to fatty acid	1	2	0.130759	0.599991	Mm07G019394
GO:0070544	histone H3-K36 demethylation	1	2	0.130759	0.599991	Mm16G036396
GO:0070584	mitochondrion morphogenesis	1	2	0.130759	0.599991	Mm14G032085
GO:0070841	inclusion body assembly	1	2	0.130759	0.599991	Mm09G022499
GO:0071026	cytoplasmic RNA surveillance	1	2	0.130759	0.599991	Mm14G032085
GO:0071398	cellular response to fatty acid	1	2	0.130759	0.599991	Mm07G019394
GO:0071706	tumor necrosis factor superfamily cytokine production	1	2	0.130759	0.599991	Mm12G027798
GO:0072697	protein localization to cell cortex	1	2	0.130759	0.599991	Mm11G027133
GO:0072699	protein localization to cortical microtubule cytoskeleton	1	2	0.130759	0.599991	Mm11G027133
GO:0075262	negative regulation of spore-bearing organ development	1	2	0.130759	0.599991	Mm18G039716
GO:0080140	regulation of jasmonic acid metabolic process	1	2	0.130759	0.599991	Mm02G004021
GO:0080141	regulation of jasmonic acid biosynthetic process	1	2	0.130759	0.599991	Mm02G004021
GO:0097696	STAT cascade	1	2	0.130759	0.599991	Mm12G028424
GO:0098502	DNA dephosphorylation	1	2	0.130759	0.599991	Mm04G009716
GO:0098503	DNA 3' dephosphorylation	1	2	0.130759	0.599991	Mm04G009716
GO:0098504	DNA 3' dephosphorylation involved in DNA repair	1	2	0.130759	0.599991	Mm04G009716
GO:0098506	polynucleotide 3' dephosphorylation	1	2	0.130759	0.599991	Mm04G009716
GO:1902039	negative regulation of seed dormancy process	1	2	0.130759	0.599991	Mm07G018237
GO:1903555	regulation of tumor necrosis factor superfamily cytokine production	1	2	0.130759	0.599991	Mm12G027798
GO:1903557	positive regulation of tumor necrosis factor superfamily cytokine production	1	2	0.130759	0.599991	Mm12G027798
GO:1903665	negative regulation of asexual reproduction	1	2	0.130759	0.599991	Mm18G039716
GO:1904353	regulation of telomere capping	1	2	0.130759	0.599991	Mm04G009716
GO:1904355	positive regulation of telomere capping	1	2	0.130759	0.599991	Mm04G009716
GO:1904732	regulation of electron carrier activity	1	2	0.130759	0.599991	Mm12G028676
GO:1904734	positive regulation of electron carrier activity	1	2	0.130759	0.599991	Mm12G028676
GO:1904892	regulation of STAT cascade	1	2	0.130759	0.599991	Mm12G028424
GO:1904959	regulation of cytochrome-c oxidase activity	1	2	0.130759	0.599991	Mm12G028676
GO:1904960	positive regulation of cytochrome-c oxidase activity	1	2	0.130759	0.599991	Mm12G028676
GO:2000011	regulation of adaxial/abaxial pattern formation	1	2	0.130759	0.599991	Mm16G036446
GO:2000210	positive regulation of anoikis	1	2	0.130759	0.599991	Mm04G009951
GO:2000827	mitochondrial RNA surveillance	1	2	0.130759	0.599991	Mm14G032085
GO:0001558	regulation of cell growth	13	136	0.130793	0.599991	Mm02G004697;Mm05G012914;Mm07G016854;Mm07G018468;Mm11G026595;Mm11G026760;Mm11G026761;Mm11G026762;Mm14G031635;Mm14G032085;Mm16G036446;MmUnG043393;MmUnG045834
GO:0015858	nucleoside transport	5	40	0.130901	0.599991	Mm01G001589;Mm02G004974;Mm02G005067;Mm10G024448;Mm19G041280
GO:0071456	cellular response to hypoxia	5	40	0.130901	0.599991	Mm04G009392;Mm04G009492;Mm06G015832;Mm12G028494;Mm17G037718
GO:0042330	taxis	7	63	0.132134	0.604854	Mm01G000612;Mm07G016470;Mm08G019835;Mm14G031738;Mm16G036093;MmUnG043393;MmUnG045834
GO:0050778	positive regulation of immune response	14	149	0.13281	0.605412	Mm01G003438;Mm02G005848;Mm02G005856;Mm05G013358;Mm06G015812;Mm07G019037;Mm11G025375;Mm12G029054;Mm12G029060;Mm13G031504;Mm14G032821;Mm14G032968;MmUnG042583;MmUnG046263
GO:0060627	regulation of vesicle-mediated transport	9	87	0.133247	0.605412	Mm04G009631;Mm06G016042;Mm06G016080;Mm07G016854;Mm08G020035;Mm11G026364;Mm18G039245;MmUnG041576;MmUnG044925
GO:0048571	long-day photoperiodism	8	75	0.133431	0.605412	Mm04G009764;Mm07G016671;Mm11G026542;Mm11G027583;Mm11G027600;Mm16G035189;MmUnG042784;MmUnG044145
GO:0006020	inositol metabolic process	3	19	0.133544	0.605412	Mm08G019835;Mm16G035587;Mm18G039413
GO:0007281	germ cell development	3	19	0.133544	0.605412	Mm01G001432;Mm01G003113;MmUnG041859
GO:0032885	regulation of polysaccharide biosynthetic process	3	19	0.133544	0.605412	Mm12G028264;MmUnG042483;MmUnG045228
GO:0051569	regulation of histone H3-K4 methylation	3	19	0.133544	0.605412	Mm11G025949;Mm18G039051;Mm18G039057
GO:0009101	glycoprotein biosynthetic process	12	124	0.133635	0.605412	Mm01G002028;Mm04G009716;Mm07G019154;Mm11G025602;Mm11G025662;Mm11G025997;Mm12G029054;Mm12G029060;Mm18G039484;MmUnG042136;MmUnG042205;MmUnG045406
GO:0071705	nitrogen compound transport	71	921	0.134791	0.609861	Mm01G001369;Mm01G001589;Mm01G001899;Mm01G003425;Mm02G004082;Mm02G004133;Mm02G004262;Mm02G004959;Mm02G004960;Mm02G004974;Mm02G005067;Mm02G005075;Mm02G005077;Mm02G005411;Mm02G005700;Mm02G005759;Mm03G006808;Mm03G007066;Mm03G008461;Mm04G009631;Mm04G010171;Mm04G010398;Mm04G010704;Mm05G012458;Mm05G012466;Mm05G012489;Mm05G012498;Mm05G012648;Mm05G012781;Mm05G013457;Mm05G013588;Mm05G013602;Mm06G015322;Mm0…
GO:0032102	negative regulation of response to external stimulus	6	52	0.137457	0.619529	Mm02G006288;Mm14G032227;Mm18G039051;Mm18G039057;Mm18G039716;Mm19G041016
GO:0032508	DNA duplex unwinding	6	52	0.137457	0.619529	Mm01G001818;Mm05G012054;Mm06G015411;Mm14G032085;Mm16G036539;MmUnG045529
GO:0071489	cellular response to red or far red light	6	52	0.137457	0.619529	Mm03G007145;Mm03G008251;Mm04G009242;Mm08G020935;Mm16G035420;MmUnG042784
GO:0002253	activation of immune response	10	100	0.138454	0.623219	Mm01G003438;Mm05G013358;Mm11G025375;Mm12G029054;Mm12G029060;Mm13G031504;Mm14G032821;Mm14G032968;MmUnG042583;MmUnG046263
GO:0016571	histone methylation	12	125	0.139309	0.626265	Mm01G001432;Mm04G008930;Mm04G009308;Mm04G011190;Mm07G018726;Mm09G023226;Mm11G025911;Mm11G025949;Mm12G028424;Mm16G036396;Mm18G039051;Mm18G039057
GO:0016999	antibiotic metabolic process	9	88	0.1401	0.627499	Mm04G009816;Mm06G015351;Mm07G018703;Mm08G020143;Mm10G025034;Mm12G029280;Mm18G039163;Mm19G040452;MmUnG045097
GO:2000024	regulation of leaf development	9	88	0.1401	0.627499	Mm01G003438;Mm03G006945;Mm03G008617;Mm13G031504;Mm14G032821;Mm14G032968;Mm16G036446;MmUnG042583;MmUnG045156
GO:0009932	cell tip growth	17	189	0.140554	0.627499	Mm01G002008;Mm01G002619;Mm01G002625;Mm03G006505;Mm04G010289;Mm07G017201;Mm07G017726;Mm07G018468;Mm08G019835;Mm11G026999;Mm14G031738;Mm14G032476;Mm15G034305;Mm16G036458;Mm19G041005;MmUnG043393;MmUnG045834
GO:0006605	protein targeting	25	294	0.140799	0.627499	Mm01G001369;Mm01G001899;Mm02G004082;Mm02G004133;Mm02G004262;Mm02G005411;Mm03G006808;Mm04G010171;Mm04G010704;Mm05G012458;Mm05G012489;Mm05G013457;Mm06G015322;Mm07G017368;Mm07G019154;Mm08G021065;Mm10G024805;Mm12G029046;Mm13G029855;Mm13G031117;Mm13G031139;Mm13G031168;Mm16G036580;Mm18G039092;MmUnG043444
GO:0034470	ncRNA processing	28	334	0.140935	0.627499	Mm01G000154;Mm01G001382;Mm01G002629;Mm02G003938;Mm02G005022;Mm02G006265;Mm03G006735;Mm03G006776;Mm03G007393;Mm03G008528;Mm04G009981;Mm05G011418;Mm06G014806;Mm06G015719;Mm07G018633;Mm09G022324;Mm11G026575;Mm11G027001;Mm14G031702;Mm14G032473;Mm14G033329;Mm16G035507;Mm19G041397;Mm19G041401;MmUnG042541;MmUnG043328;MmUnG045042;MmUnG045396
GO:0043628	ncRNA 3'-end processing	4	30	0.141732	0.627499	Mm01G002629;Mm06G015719;Mm14G032473;MmUnG042541
GO:0060688	regulation of morphogenesis of a branching structure	4	30	0.141732	0.627499	Mm02G006288;Mm11G026542;Mm11G027108;Mm14G032227
GO:2000032	regulation of secondary shoot formation	4	30	0.141732	0.627499	Mm02G006288;Mm11G026542;Mm11G027108;Mm14G032227
GO:0006955	immune response	48	606	0.142389	0.627499	Mm01G002378;Mm01G003438;Mm02G004662;Mm02G005848;Mm02G005856;Mm03G008285;Mm04G008930;Mm04G009134;Mm04G009135;Mm04G009657;Mm05G013358;Mm06G015812;Mm07G018847;Mm07G019037;Mm10G024617;Mm10G025034;Mm11G025375;Mm11G026076;Mm11G027133;Mm12G028226;Mm12G028264;Mm12G028371;Mm12G028404;Mm12G029054;Mm12G029060;Mm13G030562;Mm13G031504;Mm14G032251;Mm14G032580;Mm14G032821;Mm14G032968;Mm17G036675;Mm17G036912;Mm1…
GO:0001754	eye photoreceptor cell differentiation	2	10	0.143515	0.627499	Mm01G003113;MmUnG041859
GO:0006772	thiamine metabolic process	2	10	0.143515	0.627499	Mm06G013914;Mm07G017006
GO:0016973	poly(A)+ mRNA export from nucleus	2	10	0.143515	0.627499	Mm04G010398;Mm08G019755
GO:0034517	ribophagy	2	10	0.143515	0.627499	Mm06G016042;Mm06G016080
GO:0042723	thiamine-containing compound metabolic process	2	10	0.143515	0.627499	Mm06G013914;Mm07G017006
GO:0043268	positive regulation of potassium ion transport	2	10	0.143515	0.627499	Mm01G001946;Mm06G015873
GO:0046530	photoreceptor cell differentiation	2	10	0.143515	0.627499	Mm01G003113;MmUnG041859
GO:0048317	seed morphogenesis	2	10	0.143515	0.627499	Mm04G009673;Mm07G018726
GO:0050878	regulation of body fluid levels	2	10	0.143515	0.627499	Mm08G020743;Mm11G027349
GO:0055070	copper ion homeostasis	2	10	0.143515	0.627499	Mm10G024751;Mm12G028676
GO:0071963	establishment or maintenance of cell polarity regulating cell shape	2	10	0.143515	0.627499	Mm04G010461;Mm04G010487
GO:0098781	ncRNA transcription	2	10	0.143515	0.627499	Mm04G009951;Mm12G028424
GO:2000738	positive regulation of stem cell differentiation	2	10	0.143515	0.627499	Mm02G003859;Mm12G028424
GO:0008219	cell death	30	362	0.145031	0.632551	Mm01G000612;Mm01G002378;Mm02G004039;Mm02G004262;Mm02G004662;Mm02G004928;Mm02G005354;Mm02G005371;Mm04G009657;Mm04G009951;Mm06G016107;Mm07G016721;Mm11G025987;Mm11G027129;Mm11G027133;Mm11G027473;Mm11G027477;Mm12G028944;Mm12G029054;Mm12G029060;Mm13G030562;Mm14G032085;Mm14G032251;Mm15G034182;Mm16G036446;Mm17G037061;Mm18G039154;Mm19G041066;MmUnG041876;MmUnG043129
GO:0016265	death	30	362	0.145031	0.632551	Mm01G000612;Mm01G002378;Mm02G004039;Mm02G004262;Mm02G004662;Mm02G004928;Mm02G005354;Mm02G005371;Mm04G009657;Mm04G009951;Mm06G016107;Mm07G016721;Mm11G025987;Mm11G027129;Mm11G027133;Mm11G027473;Mm11G027477;Mm12G028944;Mm12G029054;Mm12G029060;Mm13G030562;Mm14G032085;Mm14G032251;Mm15G034182;Mm16G036446;Mm17G037061;Mm18G039154;Mm19G041066;MmUnG041876;MmUnG043129
GO:0032392	DNA geometric change	6	53	0.146722	0.63762	Mm01G001818;Mm05G012054;Mm06G015411;Mm14G032085;Mm16G036539;MmUnG045529
GO:0016052	carbohydrate catabolic process	13	139	0.147122	0.63762	Mm01G002903;Mm01G003108;Mm02G004928;Mm02G005935;Mm04G009452;Mm05G012855;Mm05G013579;Mm07G018226;Mm09G022863;Mm10G024760;Mm11G025987;Mm17G037351;MmUnG041854
GO:0006913	nucleocytoplasmic transport	14	152	0.148505	0.63762	Mm01G001369;Mm01G001899;Mm02G004262;Mm03G006808;Mm04G010171;Mm04G010398;Mm07G017368;Mm08G019755;Mm08G021065;Mm09G023019;Mm10G024805;Mm16G035214;MmUnG041817;MmUnG043444
GO:0051169	nuclear transport	14	152	0.148505	0.63762	Mm01G001369;Mm01G001899;Mm02G004262;Mm03G006808;Mm04G010171;Mm04G010398;Mm07G017368;Mm08G019755;Mm08G021065;Mm09G023019;Mm10G024805;Mm16G035214;MmUnG041817;MmUnG043444
GO:0048699	generation of neurons	8	77	0.148505	0.63762	Mm01G000612;Mm01G001432;Mm01G003113;Mm07G017418;Mm11G026595;Mm16G036093;Mm19G040682;MmUnG041859
GO:0010942	positive regulation of cell death	7	65	0.148633	0.63762	Mm02G005354;Mm02G005371;Mm04G009951;Mm12G028944;Mm13G030562;Mm18G039154;Mm19G041066
GO:0048666	neuron development	7	65	0.148633	0.63762	Mm01G000612;Mm01G003113;Mm07G017418;Mm11G026595;Mm16G036093;Mm19G040682;MmUnG041859
GO:0040007	growth	71	928	0.149507	0.63762	Mm01G001499;Mm01G002008;Mm01G002619;Mm01G002625;Mm01G002930;Mm02G004262;Mm02G004697;Mm02G005975;Mm03G006505;Mm03G007145;Mm03G007377;Mm04G010289;Mm05G012054;Mm05G012370;Mm05G012914;Mm05G013153;Mm05G013158;Mm06G014089;Mm06G015343;Mm06G016225;Mm06G016256;Mm07G016854;Mm07G017201;Mm07G017726;Mm07G018468;Mm08G019835;Mm08G019998;Mm08G019999;Mm08G020004;Mm08G020086;Mm09G022819;Mm09G023354;Mm11G026595;Mm1…
GO:0048638	regulation of developmental growth	19	217	0.149553	0.63762	Mm01G002930;Mm03G007377;Mm06G014089;Mm06G015343;Mm07G016854;Mm08G020086;Mm09G023354;Mm11G026595;Mm13G031020;Mm14G032996;Mm16G036446;Mm17G037509;Mm18G039484;Mm19G041397;Mm19G041401;MmUnG043393;MmUnG044386;MmUnG045834;MmUnG046010
GO:0006108	malate metabolic process	3	20	0.149644	0.63762	Mm07G018703;Mm18G039163;Mm19G041332
GO:0010264	myo-inositol hexakisphosphate biosynthetic process	3	20	0.149644	0.63762	Mm16G035587;Mm18G039412;Mm18G039413
GO:0032352	positive regulation of hormone metabolic process	3	20	0.149644	0.63762	Mm02G004662;Mm08G020698;Mm08G021642
GO:0033517	myo-inositol hexakisphosphate metabolic process	3	20	0.149644	0.63762	Mm16G035587;Mm18G039412;Mm18G039413
GO:0042060	wound healing	3	20	0.149644	0.63762	Mm08G020743;Mm11G027349;Mm16G036446
GO:0045737	positive regulation of cyclin-dependent protein serine/threonine kinase activity	3	20	0.149644	0.63762	Mm06G016083;Mm17G037550;MmUnG041650
GO:0048255	mRNA stabilization	3	20	0.149644	0.63762	Mm02G003859;Mm19G040510;MmUnG045466
GO:0072529	pyrimidine-containing compound catabolic process	3	20	0.149644	0.63762	Mm02G003796;Mm04G010064;Mm19G039901
GO:1902373	negative regulation of mRNA catabolic process	3	20	0.149644	0.63762	Mm02G003859;Mm19G040510;MmUnG045466
GO:1990069	stomatal opening	3	20	0.149644	0.63762	Mm05G012618;Mm17G037550;MmUnG041650
GO:0000209	protein polyubiquitination	12	127	0.151038	0.64278	Mm01G002373;Mm01G003113;Mm03G006563;Mm05G012370;Mm05G013150;Mm06G014643;Mm08G020993;Mm11G026002;Mm12G028307;Mm12G028860;Mm14G033453;MmUnG041859
GO:0009960	endosperm development	5	42	0.152057	0.644773	Mm03G007377;Mm07G018726;Mm11G027001;Mm16G036446;MmUnG043500
GO:0036294	cellular response to decreased oxygen levels	5	42	0.152057	0.644773	Mm04G009392;Mm04G009492;Mm06G015832;Mm12G028494;Mm17G037718
GO:0071453	cellular response to oxygen levels	5	42	0.152057	0.644773	Mm04G009392;Mm04G009492;Mm06G015832;Mm12G028494;Mm17G037718
GO:0006836	neurotransmitter transport	4	31	0.154569	0.652273	Mm03G007357;Mm07G016854;Mm08G020616;Mm08G020619
GO:0043489	RNA stabilization	4	31	0.154569	0.652273	Mm02G003859;Mm11G026586;Mm19G040510;MmUnG045466
GO:0048812	neuron projection morphogenesis	4	31	0.154569	0.652273	Mm01G000612;Mm11G026595;Mm16G036093;Mm19G040682
GO:1902369	negative regulation of RNA catabolic process	4	31	0.154569	0.652273	Mm02G003859;Mm11G026586;Mm19G040510;MmUnG045466
GO:0072528	pyrimidine-containing compound biosynthetic process	6	54	0.15626	0.656591	Mm01G002717;Mm04G009546;Mm06G013914;Mm07G016579;Mm07G017006;Mm15G033964
GO:0009756	carbohydrate mediated signaling	8	78	0.15634	0.656591	Mm02G004928;Mm02G005361;Mm04G009726;Mm04G009736;Mm07G016361;Mm07G016752;Mm07G017048;Mm11G025987
GO:0010182	sugar mediated signaling pathway	8	78	0.15634	0.656591	Mm02G004928;Mm02G005361;Mm04G009726;Mm04G009736;Mm07G016361;Mm07G016752;Mm07G017048;Mm11G025987
GO:0065002	intracellular protein transmembrane transport	8	78	0.15634	0.656591	Mm02G004082;Mm02G004133;Mm02G005411;Mm06G015322;Mm13G029855;Mm13G031168;Mm16G036580;Mm18G039092
GO:0010193	response to ozone	7	66	0.157228	0.658745	Mm04G009134;Mm04G009135;Mm08G019453;Mm08G020159;Mm12G028226;Mm19G041282;MmUnG045840
GO:0019318	hexose metabolic process	7	66	0.157228	0.658745	Mm01G002431;Mm01G003560;Mm07G019154;Mm08G020226;Mm11G025987;Mm15G033600;Mm15G033611
GO:0009832	plant-type cell wall biogenesis	19	219	0.158702	0.66044	Mm01G002619;Mm01G002625;Mm02G005321;Mm04G009158;Mm04G009726;Mm04G009736;Mm07G016361;Mm07G016752;Mm07G018949;Mm09G022576;Mm10G024791;Mm11G026758;Mm11G027133;Mm12G028249;Mm13G030878;Mm14G032476;Mm15G034693;Mm16G035156;MmUnG045228
GO:0002684	positive regulation of immune system process	14	154	0.159499	0.66044	Mm01G003438;Mm02G005848;Mm02G005856;Mm05G013358;Mm06G015812;Mm07G019037;Mm11G025375;Mm12G029054;Mm12G029060;Mm13G031504;Mm14G032821;Mm14G032968;MmUnG042583;MmUnG046263
GO:0009651	response to salt stress	56	725	0.164137	0.66044	Mm01G001138;Mm01G001837;Mm01G001946;Mm01G002102;Mm01G002378;Mm01G003560;Mm02G004568;Mm02G005335;Mm02G005361;Mm03G006505;Mm03G008617;Mm04G009349;Mm04G009816;Mm04G010003;Mm05G012054;Mm06G015623;Mm06G016121;Mm06G016225;Mm07G017309;Mm07G018703;Mm07G019154;Mm07G019394;Mm08G019835;Mm08G020086;Mm08G020226;Mm08G021642;Mm09G022080;Mm09G022819;Mm09G023013;Mm10G024748;Mm11G025997;Mm11G026206;Mm11G026491;Mm1…
GO:0046283	anthocyanin-containing compound metabolic process	6	55	0.166062	0.66044	Mm03G008617;Mm04G010691;Mm09G023354;Mm12G029054;Mm12G029060;Mm17G036706
GO:1903649	regulation of cytoplasmic transport	6	55	0.166062	0.66044	Mm01G001369;Mm06G015832;Mm06G015873;Mm06G016042;Mm06G016080;Mm16G036446
GO:0048589	developmental growth	54	698	0.166261	0.66044	Mm01G002008;Mm01G002619;Mm01G002625;Mm01G002930;Mm02G005975;Mm03G006505;Mm03G007145;Mm03G007377;Mm04G010289;Mm05G012054;Mm05G012370;Mm05G013153;Mm05G013158;Mm06G014089;Mm06G015343;Mm06G016256;Mm07G016854;Mm07G017201;Mm07G017726;Mm07G018468;Mm08G019835;Mm08G019998;Mm08G019999;Mm08G020004;Mm08G020086;Mm09G023354;Mm11G026595;Mm11G026999;Mm11G027001;Mm13G031020;Mm14G031738;Mm14G032476;Mm14G032996;Mm1…
GO:0006607	NLS-bearing protein import into nucleus	3	21	0.166324	0.66044	Mm01G001369;Mm04G010171;Mm08G021065
GO:0007004	telomere maintenance via telomerase	3	21	0.166324	0.66044	Mm04G009716;Mm16G036539;MmUnG044681
GO:0007169	transmembrane receptor protein tyrosine kinase signaling pathway	3	21	0.166324	0.66044	Mm02G004262;Mm05G012648;Mm13G031139
GO:0009608	response to symbiont	3	21	0.166324	0.66044	Mm03G006667;Mm09G022863;Mm11G026955
GO:0035672	oligopeptide transmembrane transport	3	21	0.166324	0.66044	Mm03G008461;Mm05G012781;Mm06G016166
GO:1904031	positive regulation of cyclin-dependent protein kinase activity	3	21	0.166324	0.66044	Mm06G016083;Mm17G037550;MmUnG041650
GO:0006221	pyrimidine nucleotide biosynthetic process	4	32	0.167821	0.66044	Mm01G002717;Mm04G009546;Mm07G016579;Mm15G033964
GO:0008272	sulfate transport	4	32	0.167821	0.66044	Mm11G027554;Mm14G032114;Mm16G035128;Mm16G035214
GO:0015865	purine nucleotide transport	4	32	0.167821	0.66044	Mm01G001589;Mm02G004974;Mm02G005067;Mm19G041280
GO:0015868	purine ribonucleotide transport	4	32	0.167821	0.66044	Mm01G001589;Mm02G004974;Mm02G005067;Mm19G041280
GO:0051503	adenine nucleotide transport	4	32	0.167821	0.66044	Mm01G001589;Mm02G004974;Mm02G005067;Mm19G041280
GO:0002064	epithelial cell development	2	11	0.16789	0.66044	Mm01G003113;MmUnG041859
GO:0002065	columnar/cuboidal epithelial cell differentiation	2	11	0.16789	0.66044	Mm01G003113;MmUnG041859
GO:0002066	columnar/cuboidal epithelial cell development	2	11	0.16789	0.66044	Mm01G003113;MmUnG041859
GO:0006269	DNA replication, synthesis of RNA primer	2	11	0.16789	0.66044	Mm06G015411;MmUnG045529
GO:0006525	arginine metabolic process	2	11	0.16789	0.66044	Mm02G005760;Mm16G035357
GO:0009394	2'-deoxyribonucleotide metabolic process	2	11	0.16789	0.66044	Mm01G002717;Mm19G039901
GO:0009939	positive regulation of gibberellic acid mediated signaling pathway	2	11	0.16789	0.66044	Mm07G018237;Mm14G032085
GO:0016137	glycoside metabolic process	2	11	0.16789	0.66044	Mm07G017418;Mm10G025034
GO:0019692	deoxyribose phosphate metabolic process	2	11	0.16789	0.66044	Mm01G002717;Mm19G039901
GO:0030707	ovarian follicle cell development	2	11	0.16789	0.66044	Mm01G003113;MmUnG041859
GO:0033273	response to vitamin	2	11	0.16789	0.66044	Mm06G013914;Mm06G015832
GO:0034341	response to interferon-gamma	2	11	0.16789	0.66044	Mm19G040510;MmUnG045466
GO:0043903	regulation of symbiosis, encompassing mutualism through parasitism	2	11	0.16789	0.66044	Mm14G033223;MmUnG046009
GO:0045604	regulation of epidermal cell differentiation	2	11	0.16789	0.66044	Mm01G002930;MmUnG046010
GO:0045682	regulation of epidermis development	2	11	0.16789	0.66044	Mm01G002930;MmUnG046010
GO:0045815	positive regulation of gene expression, epigenetic	2	11	0.16789	0.66044	Mm05G013158;Mm07G017240
GO:0046352	disaccharide catabolic process	2	11	0.16789	0.66044	Mm05G013579;Mm17G037351
GO:0051973	positive regulation of telomerase activity	2	11	0.16789	0.66044	Mm02G005361;Mm04G009716
GO:0071346	cellular response to interferon-gamma	2	11	0.16789	0.66044	Mm19G040510;MmUnG045466
GO:0009626	plant-type hypersensitive response	9	92	0.169244	0.66044	Mm01G002378;Mm02G004662;Mm04G009657;Mm12G029054;Mm12G029060;Mm13G030562;Mm14G032251;Mm17G037061;MmUnG043129
GO:0010038	response to metal ion	58	756	0.172325	0.66044	Mm01G002176;Mm01G003281;Mm02G004082;Mm02G004133;Mm02G004568;Mm03G006950;Mm03G007170;Mm04G009114;Mm04G009816;Mm06G014068;Mm06G014643;Mm06G015712;Mm06G015887;Mm07G017048;Mm07G017654;Mm07G017682;Mm07G018226;Mm07G019394;Mm08G019835;Mm08G020086;Mm08G021381;Mm08G021642;Mm09G023622;Mm11G025439;Mm11G025513;Mm11G025626;Mm11G026206;Mm11G026753;Mm11G027108;Mm11G027133;Mm12G029046;Mm13G029855;Mm14G031823;Mm1…
GO:0009117	nucleotide metabolic process	27	329	0.172325	0.66044	Mm01G001463;Mm01G001472;Mm01G002717;Mm01G002957;Mm02G004473;Mm02G004928;Mm03G006888;Mm04G009452;Mm04G009546;Mm04G009716;Mm06G015411;Mm07G016579;Mm07G016630;Mm08G019669;Mm09G023196;Mm11G025987;Mm12G028604;Mm12G028741;Mm13G030794;Mm15G033964;Mm16G036399;Mm16G036539;Mm18G039163;Mm19G039901;Mm19G040452;MmUnG045529;MmUnG045936
GO:0015718	monocarboxylic acid transport	8	80	0.172579	0.66044	Mm03G008128;Mm03G008130;Mm07G017309;Mm12G029507;Mm13G030878;Mm19G040551;Mm19G040966;Mm19G041282
GO:0043069	negative regulation of programmed cell death	8	80	0.172579	0.66044	Mm02G004262;Mm07G016721;Mm11G027133;Mm14G032085;Mm15G034182;Mm16G036446;Mm17G037061;MmUnG041876
GO:0055081	anion homeostasis	8	80	0.172579	0.66044	Mm08G020616;Mm08G020619;Mm11G025874;Mm15G034182;Mm15G034473;Mm16G035587;Mm19G039996;MmUnG041876
GO:0000154	rRNA modification	5	44	0.174529	0.66044	Mm01G002629;Mm09G022324;Mm14G032473;Mm14G033329;MmUnG042541
GO:0016482	cytoplasmic transport	46	590	0.174676	0.66044	Mm01G001369;Mm01G001899;Mm02G004082;Mm02G004133;Mm02G004262;Mm02G004959;Mm02G004960;Mm02G005075;Mm02G005077;Mm02G005411;Mm02G006073;Mm03G006808;Mm04G009672;Mm04G010171;Mm04G010398;Mm04G010691;Mm04G010704;Mm05G012458;Mm05G012489;Mm05G013457;Mm06G015322;Mm06G015832;Mm06G015873;Mm06G016042;Mm06G016080;Mm07G017368;Mm07G019154;Mm08G019755;Mm08G021065;Mm09G023019;Mm10G024805;Mm10G024923;Mm12G027798;Mm1…
GO:1902580	single-organism cellular localization	38	480	0.175871	0.66044	Mm01G001369;Mm01G001899;Mm02G004082;Mm02G004133;Mm02G004262;Mm02G005411;Mm03G006808;Mm03G007357;Mm04G010171;Mm04G010461;Mm04G010487;Mm04G010704;Mm05G012458;Mm05G012489;Mm05G013358;Mm05G013457;Mm06G015322;Mm06G015873;Mm07G017368;Mm07G019154;Mm08G019412;Mm08G019827;Mm08G021065;Mm09G022612;Mm10G024805;Mm12G027798;Mm12G029046;Mm13G029853;Mm13G029855;Mm13G031117;Mm13G031139;Mm13G031168;Mm16G036446;Mm1…
GO:0009100	glycoprotein metabolic process	12	131	0.175972	0.66044	Mm01G002028;Mm04G009716;Mm07G019154;Mm11G025602;Mm11G025662;Mm11G025997;Mm12G029054;Mm12G029060;Mm18G039484;MmUnG042136;MmUnG042205;MmUnG045406
GO:0009064	glutamine family amino acid metabolic process	6	56	0.176117	0.66044	Mm02G005760;Mm03G008617;Mm08G019835;Mm14G033462;Mm16G035357;Mm16G036079
GO:0050777	negative regulation of immune response	6	56	0.176117	0.66044	Mm11G027133;Mm17G037061;Mm17G038062;Mm18G039051;Mm18G039057;Mm19G041016
GO:0034050	host programmed cell death induced by symbiont	9	93	0.176943	0.66044	Mm01G002378;Mm02G004662;Mm04G009657;Mm12G029054;Mm12G029060;Mm13G030562;Mm14G032251;Mm17G037061;MmUnG043129
GO:0009658	chloroplast organization	18	210	0.179225	0.66044	Mm02G005411;Mm03G006451;Mm03G006549;Mm03G007350;Mm04G008795;Mm05G013638;Mm06G014911;Mm07G018237;Mm09G022397;Mm09G022426;Mm11G026473;Mm11G026624;Mm13G031187;Mm13G031361;Mm14G032478;Mm17G036707;Mm19G040535;MmUnG042068
GO:0022603	regulation of anatomical structure morphogenesis	21	250	0.179537	0.66044	Mm01G003113;Mm02G003859;Mm02G004262;Mm02G006288;Mm04G010461;Mm04G010487;Mm05G012770;Mm07G016854;Mm08G020086;Mm11G026542;Mm11G026595;Mm11G027108;Mm11G027133;Mm14G032227;Mm14G033426;Mm16G036446;Mm18G039716;Mm19G040682;MmUnG041859;MmUnG043393;MmUnG045834
GO:0002376	immune system process	53	689	0.179751	0.66044	Mm01G002378;Mm01G003113;Mm01G003438;Mm02G004662;Mm02G005848;Mm02G005856;Mm03G008285;Mm04G008930;Mm04G009134;Mm04G009135;Mm04G009657;Mm05G013358;Mm06G015812;Mm06G015844;Mm07G018847;Mm07G019037;Mm10G024617;Mm10G025034;Mm11G025375;Mm11G026076;Mm11G027133;Mm12G028226;Mm12G028264;Mm12G028371;Mm12G028404;Mm12G029054;Mm12G029060;Mm13G030562;Mm13G031504;Mm14G032251;Mm14G032580;Mm14G032821;Mm14G032968;Mm1…
GO:0015770	sucrose transport	4	33	0.181456	0.66044	Mm08G021629;Mm11G025776;Mm13G030039;Mm16G035376
GO:0043647	inositol phosphate metabolic process	4	33	0.181456	0.66044	Mm05G012861;Mm16G035587;Mm18G039412;Mm18G039413
GO:0050826	response to freezing	4	33	0.181456	0.66044	Mm03G007441;Mm12G028264;MmUnG042483;MmUnG043791
GO:0015996	chlorophyll catabolic process	3	22	0.183514	0.66044	Mm09G022819;Mm11G025968;Mm19G041329
GO:0019374	galactolipid metabolic process	3	22	0.183514	0.66044	Mm04G010918;Mm04G010922;Mm11G026364
GO:0031057	negative regulation of histone modification	3	22	0.183514	0.66044	Mm05G013158;Mm18G039051;Mm18G039057
GO:0032958	inositol phosphate biosynthetic process	3	22	0.183514	0.66044	Mm16G035587;Mm18G039412;Mm18G039413
GO:0034767	positive regulation of ion transmembrane transport	3	22	0.183514	0.66044	Mm06G015873;Mm12G028676;Mm16G036446
GO:0046149	pigment catabolic process	3	22	0.183514	0.66044	Mm09G022819;Mm11G025968;Mm19G041329
GO:0044743	intracellular protein transmembrane import	7	69	0.184312	0.66044	Mm02G004082;Mm02G004133;Mm02G005411;Mm06G015322;Mm13G029855;Mm13G031168;Mm16G036580
GO:0060560	developmental growth involved in morphogenesis	38	483	0.186005	0.66044	Mm01G002008;Mm01G002619;Mm01G002625;Mm02G005975;Mm03G006505;Mm03G007145;Mm04G010289;Mm05G012054;Mm05G012370;Mm05G013153;Mm05G013158;Mm06G016256;Mm07G016854;Mm07G017201;Mm07G017726;Mm07G018468;Mm08G019835;Mm08G019998;Mm08G019999;Mm08G020004;Mm11G026595;Mm11G026999;Mm14G031738;Mm14G032476;Mm14G033453;Mm15G034293;Mm15G034305;Mm16G036220;Mm16G036458;Mm17G036912;Mm17G037647;Mm19G040046;Mm19G041005;Mm1…
GO:0000462	maturation of SSU-rRNA from tricistronic rRNA transcript (SSU-rRNA, 5.8S rRNA, LSU-rRNA)	5	45	0.186214	0.66044	Mm01G001382;Mm02G005022;Mm11G026575;MmUnG043328;MmUnG045396
GO:0002832	negative regulation of response to biotic stimulus	5	45	0.186214	0.66044	Mm02G006288;Mm14G032227;Mm18G039051;Mm18G039057;Mm19G041016
GO:0002237	response to molecule of bacterial origin	6	57	0.186412	0.66044	Mm01G002378;Mm08G021655;Mm10G024617;Mm14G032251;MmUnG042978;MmUnG043500
GO:0071704	organic substance metabolic process	690	9999	0.189119	0.66044	Mm01G000154;Mm01G000231;Mm01G000274;Mm01G000322;Mm01G000463;Mm01G000612;Mm01G000619;Mm01G000620;Mm01G000986;Mm01G001057;Mm01G001106;Mm01G001138;Mm01G001153;Mm01G001220;Mm01G001318;Mm01G001346;Mm01G001382;Mm01G001431;Mm01G001432;Mm01G001445;Mm01G001463;Mm01G001472;Mm01G001474;Mm01G001484;Mm01G001490;Mm01G001499;Mm01G001589;Mm01G001674;Mm01G001720;Mm01G001726;Mm01G001740;Mm01G001817;Mm01G001818;Mm0…
GO:0032535	regulation of cellular component size	12	133	0.189142	0.66044	Mm01G001499;Mm01G002008;Mm01G002572;Mm02G004697;Mm06G015932;Mm08G019998;Mm08G019999;Mm08G020004;Mm14G031635;Mm16G036220;Mm18G039245;Mm19G041005
GO:2000280	regulation of root development	12	133	0.189142	0.66044	Mm06G014089;Mm06G015343;Mm07G017048;Mm09G023354;Mm11G027133;Mm13G031020;Mm14G032996;Mm14G033426;Mm16G035732;Mm17G037509;MmUnG044386;MmUnG045484
GO:0002027	regulation of heart rate	1	3	0.189585	0.66044	Mm06G015873
GO:0006207	'de novo' pyrimidine nucleobase biosynthetic process	1	3	0.189585	0.66044	Mm07G016579
GO:0006276	plasmid maintenance	1	3	0.189585	0.66044	Mm01G002243
GO:0006654	phosphatidic acid biosynthetic process	1	3	0.189585	0.66044	MmUnG043129
GO:0006687	glycosphingolipid metabolic process	1	3	0.189585	0.66044	Mm07G017418
GO:0006747	FAD biosynthetic process	1	3	0.189585	0.66044	Mm01G002957
GO:0007286	spermatid development	1	3	0.189585	0.66044	Mm01G001432
GO:0007289	spermatid nucleus differentiation	1	3	0.189585	0.66044	Mm01G001432
GO:0007338	single fertilization	1	3	0.189585	0.66044	MmUnG044681
GO:0009120	deoxyribonucleoside metabolic process	1	3	0.189585	0.66044	Mm07G016630
GO:0009211	pyrimidine deoxyribonucleoside triphosphate metabolic process	1	3	0.189585	0.66044	Mm01G002717
GO:0009221	pyrimidine deoxyribonucleotide biosynthetic process	1	3	0.189585	0.66044	Mm01G002717
GO:0009988	cell-cell recognition	1	3	0.189585	0.66044	MmUnG044681
GO:0010201	response to continuous far red light stimulus by the high-irradiance response system	1	3	0.189585	0.66044	Mm03G006667
GO:0010219	regulation of vernalization response	1	3	0.189585	0.66044	Mm04G009308
GO:0010265	SCF complex assembly	1	3	0.189585	0.66044	Mm07G017482
GO:0010360	negative regulation of anion channel activity	1	3	0.189585	0.66044	Mm03G007350
GO:0010361	regulation of anion channel activity by blue light	1	3	0.189585	0.66044	Mm03G007350
GO:0010362	negative regulation of anion channel activity by blue light	1	3	0.189585	0.66044	Mm03G007350
GO:0010372	positive regulation of gibberellin biosynthetic process	1	3	0.189585	0.66044	Mm08G021642
GO:0010799	regulation of peptidyl-threonine phosphorylation	1	3	0.189585	0.66044	Mm02G004262
GO:0010800	positive regulation of peptidyl-threonine phosphorylation	1	3	0.189585	0.66044	Mm02G004262
GO:0015871	choline transport	1	3	0.189585	0.66044	Mm07G016854
GO:0016079	synaptic vesicle exocytosis	1	3	0.189585	0.66044	Mm03G007357
GO:0016540	protein autoprocessing	1	3	0.189585	0.66044	Mm18G039154
GO:0017156	calcium ion regulated exocytosis	1	3	0.189585	0.66044	Mm03G007357
GO:0019322	pentose biosynthetic process	1	3	0.189585	0.66044	Mm07G018949
GO:0019566	arabinose metabolic process	1	3	0.189585	0.66044	Mm07G018949
GO:0019567	arabinose biosynthetic process	1	3	0.189585	0.66044	Mm07G018949
GO:0021895	cerebral cortex neuron differentiation	1	3	0.189585	0.66044	Mm01G001432
GO:0030447	filamentous growth	1	3	0.189585	0.66044	MmUnG045896
GO:0030953	astral microtubule organization	1	3	0.189585	0.66044	Mm08G021065
GO:0031204	posttranslational protein targeting to membrane, translocation	1	3	0.189585	0.66044	Mm18G039092
GO:0031291	Ran protein signal transduction	1	3	0.189585	0.66044	Mm08G021065
GO:0033280	response to vitamin D	1	3	0.189585	0.66044	Mm06G015832
GO:0033292	T-tubule organization	1	3	0.189585	0.66044	Mm06G015873
GO:0034635	glutathione transport	1	3	0.189585	0.66044	Mm14G031823
GO:0035092	sperm chromatin condensation	1	3	0.189585	0.66044	Mm01G001432
GO:0035093	spermatogenesis, exchange of chromosomal proteins	1	3	0.189585	0.66044	Mm01G001432
GO:0035493	SNARE complex assembly	1	3	0.189585	0.66044	Mm08G020035
GO:0035542	regulation of SNARE complex assembly	1	3	0.189585	0.66044	Mm08G020035
GO:0036257	multivesicular body organization	1	3	0.189585	0.66044	Mm18G039716
GO:0036309	protein localization to M-band	1	3	0.189585	0.66044	Mm06G015873
GO:0036371	protein localization to T-tubule	1	3	0.189585	0.66044	Mm06G015873
GO:0042144	vacuole fusion, non-autophagic	1	3	0.189585	0.66044	Mm08G020035
GO:0043247	telomere maintenance in response to DNA damage	1	3	0.189585	0.66044	MmUnG043011
GO:0043276	anoikis	1	3	0.189585	0.66044	Mm04G009951
GO:0043335	protein unfolding	1	3	0.189585	0.66044	Mm19G040917
GO:0043938	positive regulation of sporulation	1	3	0.189585	0.66044	Mm18G039716
GO:0043985	histone H4-R3 methylation	1	3	0.189585	0.66044	Mm04G009308
GO:0044182	filamentous growth of a population of unicellular organisms	1	3	0.189585	0.66044	MmUnG045896
GO:0045008	depyrimidination	1	3	0.189585	0.66044	Mm19G039901
GO:0046104	thymidine metabolic process	1	3	0.189585	0.66044	Mm07G016630
GO:0046125	pyrimidine deoxyribonucleoside metabolic process	1	3	0.189585	0.66044	Mm07G016630
GO:0048219	inter-Golgi cisterna vesicle-mediated transport	1	3	0.189585	0.66044	MmUnG046024
GO:0048515	spermatid differentiation	1	3	0.189585	0.66044	Mm01G001432
GO:0048813	dendrite morphogenesis	1	3	0.189585	0.66044	Mm19G040682
GO:0050806	positive regulation of synaptic transmission	1	3	0.189585	0.66044	Mm06G015832
GO:0060306	regulation of membrane repolarization	1	3	0.189585	0.66044	Mm06G015873
GO:0060307	regulation of ventricular cardiac muscle cell membrane repolarization	1	3	0.189585	0.66044	Mm06G015873
GO:0060765	regulation of androgen receptor signaling pathway	1	3	0.189585	0.66044	Mm05G013150
GO:0060850	regulation of transcription involved in cell fate commitment	1	3	0.189585	0.66044	Mm01G001432
GO:0070141	response to UV-A	1	3	0.189585	0.66044	Mm04G009242
GO:0071492	cellular response to UV-A	1	3	0.189585	0.66044	Mm04G009242
GO:0072388	flavin adenine dinucleotide biosynthetic process	1	3	0.189585	0.66044	Mm01G002957
GO:0086002	cardiac muscle cell action potential involved in contraction	1	3	0.189585	0.66044	Mm06G015873
GO:0086003	cardiac muscle cell contraction	1	3	0.189585	0.66044	Mm06G015873
GO:0086004	regulation of cardiac muscle cell contraction	1	3	0.189585	0.66044	Mm06G015873
GO:0086005	ventricular cardiac muscle cell action potential	1	3	0.189585	0.66044	Mm06G015873
GO:0086009	membrane repolarization	1	3	0.189585	0.66044	Mm06G015873
GO:0086014	atrial cardiac muscle cell action potential	1	3	0.189585	0.66044	Mm06G015873
GO:0086015	SA node cell action potential	1	3	0.189585	0.66044	Mm06G015873
GO:0086018	SA node cell to atrial cardiac muscle cell signalling	1	3	0.189585	0.66044	Mm06G015873
GO:0086019	cell-cell signaling involved in cardiac conduction	1	3	0.189585	0.66044	Mm06G015873
GO:0086026	atrial cardiac muscle cell to AV node cell signaling	1	3	0.189585	0.66044	Mm06G015873
GO:0086046	membrane depolarization during SA node cell action potential	1	3	0.189585	0.66044	Mm06G015873
GO:0086066	atrial cardiac muscle cell to AV node cell communication	1	3	0.189585	0.66044	Mm06G015873
GO:0086070	SA node cell to atrial cardiac muscle cell communication	1	3	0.189585	0.66044	Mm06G015873
GO:0086091	regulation of heart rate by cardiac conduction	1	3	0.189585	0.66044	Mm06G015873
GO:0090365	regulation of mRNA modification	1	3	0.189585	0.66044	Mm19G040510
GO:0090367	negative regulation of mRNA modification	1	3	0.189585	0.66044	Mm19G040510
GO:0097298	regulation of nucleus size	1	3	0.189585	0.66044	Mm01G002572
GO:0097484	dendrite extension	1	3	0.189585	0.66044	Mm11G026595
GO:0098907	regulation of SA node cell action potential	1	3	0.189585	0.66044	Mm06G015873
GO:0098910	regulation of atrial cardiac muscle cell action potential	1	3	0.189585	0.66044	Mm06G015873
GO:0099622	cardiac muscle cell membrane repolarization	1	3	0.189585	0.66044	Mm06G015873
GO:0099623	regulation of cardiac muscle cell membrane repolarization	1	3	0.189585	0.66044	Mm06G015873
GO:0099625	ventricular cardiac muscle cell membrane repolarization	1	3	0.189585	0.66044	Mm06G015873
GO:1901018	positive regulation of potassium ion transmembrane transporter activity	1	3	0.189585	0.66044	Mm06G015873
GO:1901021	positive regulation of calcium ion transmembrane transporter activity	1	3	0.189585	0.66044	Mm06G015873
GO:1902001	fatty acid transmembrane transport	1	3	0.189585	0.66044	Mm13G030878
GO:1903115	regulation of actin filament-based movement	1	3	0.189585	0.66044	Mm06G015873
GO:1903415	flavonoid transport from endoplasmic reticulum to plant-type vacuole	1	3	0.189585	0.66044	Mm04G010691
GO:1903779	regulation of cardiac conduction	1	3	0.189585	0.66044	Mm06G015873
GO:1903792	negative regulation of anion transport	1	3	0.189585	0.66044	Mm03G007350
GO:1903859	regulation of dendrite extension	1	3	0.189585	0.66044	Mm11G026595
GO:1903861	positive regulation of dendrite extension	1	3	0.189585	0.66044	Mm11G026595
GO:1903960	negative regulation of anion transmembrane transport	1	3	0.189585	0.66044	Mm03G007350
GO:2000209	regulation of anoikis	1	3	0.189585	0.66044	Mm04G009951
GO:2000692	negative regulation of seed maturation	1	3	0.189585	0.66044	Mm07G018237
GO:0010073	meristem maintenance	18	212	0.189611	0.66044	Mm01G001346;Mm01G002930;Mm02G004697;Mm05G012219;Mm06G014089;Mm06G015343;Mm08G019896;Mm08G019913;Mm08G020086;Mm09G023354;Mm10G024874;Mm13G031020;Mm13G031562;Mm14G032996;Mm17G037509;Mm18G039484;MmUnG044386;MmUnG046010
GO:0006012	galactose metabolic process	2	12	0.19289	0.664608	Mm01G003560;Mm08G020226
GO:0006999	nuclear pore organization	2	12	0.19289	0.664608	Mm09G023019;MmUnG041817
GO:0007411	axon guidance	2	12	0.19289	0.664608	Mm01G000612;Mm16G036093
GO:0015714	phosphoenolpyruvate transport	2	12	0.19289	0.664608	Mm03G008128;Mm03G008130
GO:0019336	phenol-containing compound catabolic process	2	12	0.19289	0.664608	MmUnG045871;MmUnG045872
GO:0030900	forebrain development	2	12	0.19289	0.664608	Mm01G001432;Mm06G015832
GO:0044088	regulation of vacuole organization	2	12	0.19289	0.664608	Mm04G010691;Mm08G020035
GO:0046940	nucleoside monophosphate phosphorylation	2	12	0.19289	0.664608	Mm01G002717;Mm16G036539
GO:0048592	eye morphogenesis	2	12	0.19289	0.664608	Mm01G003113;MmUnG041859
GO:0055002	striated muscle cell development	2	12	0.19289	0.664608	Mm02G003859;Mm16G036446
GO:0090596	sensory organ morphogenesis	2	12	0.19289	0.664608	Mm01G003113;MmUnG041859
GO:0009814	defense response, incompatible interaction	25	307	0.193611	0.666245	Mm01G003438;Mm02G004662;Mm03G008285;Mm04G008930;Mm04G009134;Mm04G009135;Mm07G018847;Mm10G024617;Mm10G025034;Mm12G028226;Mm12G028264;Mm13G030562;Mm13G031504;Mm14G032580;Mm14G032821;Mm14G032968;Mm17G036675;Mm17G036912;Mm18G039051;Mm18G039057;Mm19G041016;MmUnG042483;MmUnG042583;MmUnG043085;MmUnG043129
GO:0051817	modification of morphology or physiology of other organism involved in symbiotic interaction	7	70	0.193744	0.666245	Mm02G005848;Mm02G005856;Mm04G008930;Mm06G015812;Mm14G033223;MmUnG043085;MmUnG046009
GO:0045664	regulation of neuron differentiation	4	34	0.195441	0.671423	Mm01G003113;Mm11G026595;Mm19G040682;MmUnG041859
GO:0031348	negative regulation of defense response	11	121	0.195659	0.671514	Mm02G004039;Mm02G006288;Mm06G016107;Mm11G027473;Mm11G027477;Mm14G032227;Mm17G037061;Mm17G038062;Mm18G039051;Mm18G039057;Mm19G041016
GO:0032989	cellular component morphogenesis	53	695	0.197108	0.675828	Mm01G000612;Mm01G001499;Mm01G002008;Mm01G002619;Mm01G002625;Mm02G003859;Mm02G004262;Mm02G005975;Mm03G006505;Mm03G007145;Mm04G010289;Mm04G010461;Mm04G010487;Mm05G012054;Mm05G012370;Mm05G012770;Mm05G013158;Mm06G016256;Mm07G016854;Mm07G017201;Mm07G017726;Mm07G018468;Mm08G019835;Mm08G019998;Mm08G019999;Mm08G020004;Mm08G020743;Mm11G026595;Mm11G026999;Mm11G027133;Mm11G027349;Mm13G030878;Mm14G031738;Mm1…
GO:0009718	anthocyanin-containing compound biosynthetic process	3	23	0.201146	0.687658	Mm03G008617;Mm04G010691;Mm17G036706
GO:0080036	regulation of cytokinin-activated signaling pathway	3	23	0.201146	0.687658	Mm09G023354;Mm14G032085;Mm18G039484
GO:1902358	sulfate transmembrane transport	3	23	0.201146	0.687658	Mm11G027554;Mm14G032114;Mm16G035128
GO:0006970	response to osmotic stress	62	823	0.201823	0.689298	Mm01G001138;Mm01G001837;Mm01G001946;Mm01G002028;Mm01G002102;Mm01G002378;Mm01G003560;Mm02G003938;Mm02G004568;Mm02G005335;Mm02G005361;Mm03G006505;Mm03G008617;Mm04G009349;Mm04G009816;Mm04G010003;Mm04G011105;Mm05G012054;Mm06G015623;Mm06G016121;Mm06G016225;Mm07G017309;Mm07G018703;Mm07G019154;Mm07G019394;Mm08G019835;Mm08G020086;Mm08G020226;Mm08G021642;Mm09G022080;Mm09G022819;Mm09G023013;Mm10G024525;Mm1…
GO:0090066	regulation of anatomical structure size	12	135	0.202753	0.691803	Mm01G001499;Mm01G002008;Mm01G002572;Mm02G004697;Mm06G015932;Mm08G019998;Mm08G019999;Mm08G020004;Mm14G031635;Mm16G036220;Mm18G039245;Mm19G041005
GO:0042274	ribosomal small subunit biogenesis	8	84	0.207165	0.706172	Mm01G001382;Mm02G005022;Mm03G006735;Mm11G026575;Mm14G033329;MmUnG043328;MmUnG045042;MmUnG045396
GO:0001505	regulation of neurotransmitter levels	6	59	0.207672	0.707213	Mm03G007357;Mm08G019835;Mm08G020616;Mm08G020619;Mm11G026955;Mm14G031738
GO:0009226	nucleotide-sugar biosynthetic process	4	35	0.209744	0.710821	Mm01G001431;Mm01G002627;Mm12G028742;Mm15G034679
GO:0015766	disaccharide transport	4	35	0.209744	0.710821	Mm08G021629;Mm11G025776;Mm13G030039;Mm16G035376
GO:0015772	oligosaccharide transport	4	35	0.209744	0.710821	Mm08G021629;Mm11G025776;Mm13G030039;Mm16G035376
GO:0030308	negative regulation of cell growth	4	35	0.209744	0.710821	Mm05G012914;Mm11G026760;Mm11G026761;Mm11G026762
GO:0097190	apoptotic signaling pathway	4	35	0.209744	0.710821	Mm01G000612;Mm02G004262;Mm04G009951;Mm07G016721
GO:0072348	sulfur compound transport	5	47	0.210386	0.711624	Mm11G027554;Mm14G031823;Mm14G032114;Mm16G035128;Mm16G035214
GO:2000070	regulation of response to water deprivation	5	47	0.210386	0.711624	Mm06G014487;Mm14G032085;Mm17G037550;Mm18G038405;MmUnG041650
GO:1902582	single-organism intracellular transport	59	784	0.211048	0.712465	Mm01G001369;Mm01G001589;Mm01G001899;Mm02G004082;Mm02G004133;Mm02G004262;Mm02G004959;Mm02G004960;Mm02G005075;Mm02G005077;Mm02G005411;Mm02G005961;Mm02G006073;Mm03G006808;Mm03G007357;Mm04G009672;Mm04G010171;Mm04G010398;Mm04G010691;Mm04G010704;Mm05G012458;Mm05G012489;Mm05G013457;Mm06G015322;Mm06G015832;Mm06G015873;Mm06G016042;Mm06G016080;Mm07G017368;Mm07G019154;Mm08G019412;Mm08G019755;Mm08G019827;Mm0…
GO:0009165	nucleotide biosynthetic process	18	216	0.211243	0.712465	Mm01G001463;Mm01G001472;Mm01G002717;Mm01G002957;Mm02G004473;Mm02G004928;Mm03G006888;Mm04G009452;Mm04G009546;Mm06G015411;Mm07G016579;Mm07G016630;Mm11G025987;Mm12G028741;Mm13G030794;Mm15G033964;Mm16G036539;MmUnG045529
GO:1901293	nucleoside phosphate biosynthetic process	18	216	0.211243	0.712465	Mm01G001463;Mm01G001472;Mm01G002717;Mm01G002957;Mm02G004473;Mm02G004928;Mm03G006888;Mm04G009452;Mm04G009546;Mm06G015411;Mm07G016579;Mm07G016630;Mm11G025987;Mm12G028741;Mm13G030794;Mm15G033964;Mm16G036539;MmUnG045529
GO:0098656	anion transmembrane transport	31	394	0.214334	0.722194	Mm01G001589;Mm02G004974;Mm02G005067;Mm02G005759;Mm03G007066;Mm03G007350;Mm03G008128;Mm03G008130;Mm05G012466;Mm05G012498;Mm05G013588;Mm05G013602;Mm07G017309;Mm07G019138;Mm08G020616;Mm08G020619;Mm11G026482;Mm11G026864;Mm11G027554;Mm12G029507;Mm13G030878;Mm14G032114;Mm15G034473;Mm16G035128;Mm17G036778;Mm18G038811;Mm18G039510;Mm19G040966;Mm19G041280;MmUnG043068;MmUnG043177
GO:0001654	eye development	2	13	0.218319	0.726077	Mm01G003113;MmUnG041859
GO:0005978	glycogen biosynthetic process	2	13	0.218319	0.726077	Mm01G003560;Mm08G020226
GO:0006904	vesicle docking involved in exocytosis	2	13	0.218319	0.726077	Mm03G007357;MmUnG044925
GO:0006998	nuclear envelope organization	2	13	0.218319	0.726077	Mm04G010461;Mm04G010487
GO:0009313	oligosaccharide catabolic process	2	13	0.218319	0.726077	Mm05G013579;Mm17G037351
GO:0034656	nucleobase-containing small molecule catabolic process	2	13	0.218319	0.726077	Mm08G020743;Mm11G027349
GO:0035973	aggrephagy	2	13	0.218319	0.726077	Mm06G016042;Mm06G016080
GO:0060628	regulation of ER to Golgi vesicle-mediated transport	2	13	0.218319	0.726077	Mm06G016042;Mm06G016080
GO:0097485	neuron projection guidance	2	13	0.218319	0.726077	Mm01G000612;Mm16G036093
GO:0046885	regulation of hormone biosynthetic process	6	60	0.218612	0.726077	Mm02G004021;Mm02G004240;Mm02G004662;Mm08G020698;Mm08G021642;Mm10G024617
GO:0001819	positive regulation of cytokine production	3	24	0.219153	0.726077	Mm07G019037;Mm11G026586;Mm12G027798
GO:0010833	telomere maintenance via telomere lengthening	3	24	0.219153	0.726077	Mm04G009716;Mm16G036539;MmUnG044681
GO:0034764	positive regulation of transmembrane transport	3	24	0.219153	0.726077	Mm06G015873;Mm12G028676;Mm16G036446
GO:0052314	phytoalexin metabolic process	3	24	0.219153	0.726077	Mm03G008617;Mm06G016121;Mm13G031123
GO:0052315	phytoalexin biosynthetic process	3	24	0.219153	0.726077	Mm03G008617;Mm06G016121;Mm13G031123
GO:0070972	protein localization to endoplasmic reticulum	3	24	0.219153	0.726077	Mm06G015873;Mm07G019154;Mm18G039092
GO:0098655	cation transmembrane transport	43	562	0.2192	0.726077	Mm01G000443;Mm02G004048;Mm02G004055;Mm02G006026;Mm03G007170;Mm03G007350;Mm04G008790;Mm04G008795;Mm04G009094;Mm04G009349;Mm04G009439;Mm04G009657;Mm06G015832;Mm06G015873;Mm07G016854;Mm07G017838;Mm07G018241;Mm07G019324;Mm08G020616;Mm08G020619;Mm10G025057;Mm12G028676;Mm12G029137;Mm12G029210;Mm12G029486;Mm12G029507;Mm14G032114;Mm14G032807;Mm14G033555;Mm15G034182;Mm16G036446;Mm17G036778;Mm17G037647;Mm1…
GO:0034660	ncRNA metabolic process	32	409	0.219209	0.726077	Mm01G000154;Mm01G001382;Mm01G002629;Mm02G003938;Mm02G005022;Mm02G006265;Mm03G006735;Mm03G006776;Mm03G007393;Mm03G008528;Mm04G009951;Mm04G009981;Mm05G011418;Mm06G014806;Mm06G015719;Mm07G018633;Mm09G022324;Mm11G025626;Mm11G026575;Mm11G027001;Mm12G028424;Mm14G031702;Mm14G032473;Mm14G033329;Mm16G035507;Mm19G041397;Mm19G041401;MmUnG042541;MmUnG043328;MmUnG044952;MmUnG045042;MmUnG045396
GO:0006206	pyrimidine nucleobase metabolic process	4	36	0.22433	0.72853	Mm02G003796;Mm04G009546;Mm04G010064;Mm07G016579
GO:0030307	positive regulation of cell growth	4	36	0.22433	0.72853	Mm02G004697;Mm07G018468;Mm11G026595;Mm14G032085
GO:0006812	cation transport	52	690	0.22502	0.72853	Mm01G000443;Mm01G001946;Mm02G004048;Mm02G004055;Mm02G006026;Mm03G007170;Mm03G007350;Mm04G008790;Mm04G008795;Mm04G009094;Mm04G009349;Mm04G009439;Mm04G009657;Mm05G012618;Mm06G015832;Mm06G015873;Mm07G016854;Mm07G017654;Mm07G017682;Mm07G017838;Mm07G018241;Mm07G019324;Mm08G020616;Mm08G020619;Mm08G021629;Mm09G022819;Mm10G025057;Mm12G028676;Mm12G029137;Mm12G029210;Mm12G029486;Mm12G029507;Mm14G032114;Mm1…
GO:0010051	xylem and phloem pattern formation	9	99	0.226234	0.72853	Mm04G009284;Mm07G016854;Mm07G017309;Mm07G017482;Mm09G022576;Mm10G023637;Mm10G024525;Mm14G032996;Mm18G039625
GO:0010228	vegetative to reproductive phase transition of meristem	21	260	0.229426	0.72853	Mm03G007145;Mm04G009764;Mm05G013158;Mm06G015778;Mm07G016671;Mm07G017482;Mm07G018726;Mm11G025911;Mm11G026542;Mm11G027133;Mm11G027583;Mm11G027600;Mm13G031374;Mm14G032058;Mm14G032658;Mm14G032679;Mm16G035189;MmUnG041583;MmUnG042784;MmUnG044145;MmUnG045156
GO:0034220	ion transmembrane transport	68	918	0.230329	0.72853	Mm01G000443;Mm01G001589;Mm02G004048;Mm02G004055;Mm02G004974;Mm02G005067;Mm02G005759;Mm02G006026;Mm03G007066;Mm03G007170;Mm03G007350;Mm03G008128;Mm03G008130;Mm04G008790;Mm04G008795;Mm04G009094;Mm04G009349;Mm04G009439;Mm04G009657;Mm05G012466;Mm05G012498;Mm05G013588;Mm05G013602;Mm06G015832;Mm06G015873;Mm07G016854;Mm07G017309;Mm07G017838;Mm07G018241;Mm07G019138;Mm07G019324;Mm08G020616;Mm08G020619;Mm1…
GO:0035821	modification of morphology or physiology of other organism	7	74	0.233258	0.72853	Mm02G005848;Mm02G005856;Mm04G008930;Mm06G015812;Mm14G033223;MmUnG043085;MmUnG046009
GO:0022008	neurogenesis	8	87	0.234739	0.72853	Mm01G000612;Mm01G001432;Mm01G003113;Mm07G017418;Mm11G026595;Mm16G036093;Mm19G040682;MmUnG041859
GO:0052546	cell wall pectin metabolic process	5	49	0.235495	0.72853	Mm01G002619;Mm01G002625;Mm01G002627;Mm14G032476;Mm16G035156
GO:0009628	response to abiotic stimulus	200	2821	0.235957	0.72853	Mm01G001138;Mm01G001318;Mm01G001829;Mm01G001837;Mm01G001890;Mm01G001946;Mm01G002028;Mm01G002102;Mm01G002176;Mm01G002378;Mm01G002711;Mm01G003281;Mm01G003546;Mm01G003560;Mm01G003592;Mm02G003938;Mm02G004082;Mm02G004133;Mm02G004568;Mm02G005335;Mm02G005361;Mm02G005742;Mm03G006451;Mm03G006505;Mm03G006667;Mm03G007145;Mm03G007350;Mm03G007441;Mm03G008251;Mm03G008461;Mm03G008617;Mm04G008858;Mm04G009053;Mm0…
GO:0001817	regulation of cytokine production	3	25	0.237469	0.72853	Mm07G019037;Mm11G026586;Mm12G027798
GO:0009403	toxin biosynthetic process	3	25	0.237469	0.72853	Mm03G008617;Mm06G016121;Mm13G031123
GO:0009799	specification of symmetry	3	25	0.237469	0.72853	Mm02G003859;Mm06G014582;Mm11G027001
GO:0009855	determination of bilateral symmetry	3	25	0.237469	0.72853	Mm02G003859;Mm06G014582;Mm11G027001
GO:0031425	chloroplast RNA processing	3	25	0.237469	0.72853	Mm06G014316;Mm06G014334;Mm12G029273
GO:0048667	cell morphogenesis involved in neuron differentiation	3	25	0.237469	0.72853	Mm01G000612;Mm16G036093;Mm19G040682
GO:0080144	amino acid homeostasis	3	25	0.237469	0.72853	Mm08G020616;Mm08G020619;Mm15G034473
GO:1900425	negative regulation of defense response to bacterium	3	25	0.237469	0.72853	Mm02G006288;Mm14G032227;Mm19G041016
GO:1990778	protein localization to cell periphery	3	25	0.237469	0.72853	Mm06G015873;Mm11G027133;Mm12G027798
GO:0006479	protein methylation	12	140	0.238556	0.72853	Mm01G001432;Mm04G008930;Mm04G009308;Mm04G011190;Mm07G018726;Mm09G023226;Mm11G025911;Mm11G025949;Mm12G028424;Mm16G036396;Mm18G039051;Mm18G039057
GO:0008213	protein alkylation	12	140	0.238556	0.72853	Mm01G001432;Mm04G008930;Mm04G009308;Mm04G011190;Mm07G018726;Mm09G023226;Mm11G025911;Mm11G025949;Mm12G028424;Mm16G036396;Mm18G039051;Mm18G039057
GO:0070592	cell wall polysaccharide biosynthetic process	7	75	0.243535	0.72853	Mm01G002619;Mm01G002625;Mm10G024791;Mm14G032476;Mm15G034693;Mm16G035156;MmUnG045228
GO:0006868	glutamine transport	2	14	0.244005	0.72853	Mm08G020616;Mm08G020619
GO:0007268	synaptic transmission	2	14	0.244005	0.72853	Mm03G007357;Mm06G015832
GO:0009757	hexose mediated signaling	2	14	0.244005	0.72853	Mm02G004928;Mm11G025987
GO:0009970	cellular response to sulfate starvation	2	14	0.244005	0.72853	Mm11G027554;Mm16G035214
GO:0010148	transpiration	2	14	0.244005	0.72853	Mm06G015051;Mm11G025987
GO:0010222	stem vascular tissue pattern formation	2	14	0.244005	0.72853	Mm07G017309;Mm18G039625
GO:0042939	tripeptide transport	2	14	0.244005	0.72853	Mm06G016166;Mm14G031823
GO:0043271	negative regulation of ion transport	2	14	0.244005	0.72853	Mm03G007350;Mm09G022819
GO:0051601	exocyst localization	2	14	0.244005	0.72853	Mm15G033828;Mm16G035185
GO:0099536	synaptic signaling	2	14	0.244005	0.72853	Mm03G007357;Mm06G015832
GO:0099537	trans-synaptic signaling	2	14	0.244005	0.72853	Mm03G007357;Mm06G015832
GO:1903706	regulation of hemopoiesis	2	14	0.244005	0.72853	Mm01G003113;MmUnG041859
GO:2000736	regulation of stem cell differentiation	2	14	0.244005	0.72853	Mm02G003859;Mm12G028424
GO:0000011	vacuole inheritance	1	4	0.244434	0.72853	MmUnG045896
GO:0000023	maltose metabolic process	1	4	0.244434	0.72853	Mm17G037351
GO:0000454	snoRNA guided rRNA pseudouridine synthesis	1	4	0.244434	0.72853	Mm09G022324
GO:0000960	regulation of mitochondrial RNA catabolic process	1	4	0.244434	0.72853	Mm14G032085
GO:0000962	positive regulation of mitochondrial RNA catabolic process	1	4	0.244434	0.72853	Mm14G032085
GO:0002566	somatic diversification of immune receptors via somatic mutation	1	4	0.244434	0.72853	Mm06G015844
GO:0003140	determination of left/right asymmetry in lateral mesoderm	1	4	0.244434	0.72853	Mm06G014582
GO:0006528	asparagine metabolic process	1	4	0.244434	0.72853	MmUnG043371
GO:0006529	asparagine biosynthetic process	1	4	0.244434	0.72853	MmUnG043371
GO:0006646	phosphatidylethanolamine biosynthetic process	1	4	0.244434	0.72853	Mm02G004281
GO:0008347	glial cell migration	1	4	0.244434	0.72853	Mm01G000612
GO:0009133	nucleoside diphosphate biosynthetic process	1	4	0.244434	0.72853	Mm01G002717
GO:0009186	deoxyribonucleoside diphosphate metabolic process	1	4	0.244434	0.72853	Mm01G002717
GO:0009189	deoxyribonucleoside diphosphate biosynthetic process	1	4	0.244434	0.72853	Mm01G002717
GO:0009445	putrescine metabolic process	1	4	0.244434	0.72853	Mm01G002102
GO:0009446	putrescine biosynthetic process	1	4	0.244434	0.72853	Mm01G002102
GO:0009727	detection of ethylene stimulus	1	4	0.244434	0.72853	Mm07G019394
GO:0009806	lignan metabolic process	1	4	0.244434	0.72853	Mm19G040482
GO:0009807	lignan biosynthetic process	1	4	0.244434	0.72853	Mm19G040482
GO:0009868	jasmonic acid and ethylene-dependent systemic resistance, jasmonic acid mediated signaling pathway	1	4	0.244434	0.72853	MmUnG043085
GO:0010080	regulation of floral meristem growth	1	4	0.244434	0.72853	Mm14G032996
GO:0010253	UDP-rhamnose biosynthetic process	1	4	0.244434	0.72853	Mm12G028742
GO:0010365	positive regulation of ethylene biosynthetic process	1	4	0.244434	0.72853	Mm02G004662
GO:0010441	guard cell development	1	4	0.244434	0.72853	Mm07G017201
GO:0010442	guard cell morphogenesis	1	4	0.244434	0.72853	Mm07G017201
GO:0015822	ornithine transport	1	4	0.244434	0.72853	Mm17G036778
GO:0016446	somatic hypermutation of immunoglobulin genes	1	4	0.244434	0.72853	Mm06G015844
GO:0019482	beta-alanine metabolic process	1	4	0.244434	0.72853	Mm08G019835
GO:0019484	beta-alanine catabolic process	1	4	0.244434	0.72853	Mm08G019835
GO:0019918	peptidyl-arginine methylation, to symmetrical-dimethyl arginine	1	4	0.244434	0.72853	Mm04G009308
GO:0021537	telencephalon development	1	4	0.244434	0.72853	Mm06G015832
GO:0030521	androgen receptor signaling pathway	1	4	0.244434	0.72853	Mm05G013150
GO:0031337	positive regulation of sulfur amino acid metabolic process	1	4	0.244434	0.72853	Mm02G004662
GO:0031930	mitochondria-nucleus signaling pathway	1	4	0.244434	0.72853	Mm11G025553
GO:0032924	activin receptor signaling pathway	1	4	0.244434	0.72853	Mm06G014582
GO:0032925	regulation of activin receptor signaling pathway	1	4	0.244434	0.72853	Mm06G014582
GO:0032926	negative regulation of activin receptor signaling pathway	1	4	0.244434	0.72853	Mm06G014582
GO:0033138	positive regulation of peptidyl-serine phosphorylation	1	4	0.244434	0.72853	Mm02G004262
GO:0033478	UDP-rhamnose metabolic process	1	4	0.244434	0.72853	Mm12G028742
GO:0034757	negative regulation of iron ion transport	1	4	0.244434	0.72853	Mm09G022819
GO:0035344	hypoxanthine transport	1	4	0.244434	0.72853	MmUnG045880
GO:0038034	signal transduction in absence of ligand	1	4	0.244434	0.72853	Mm07G016721
GO:0038092	nodal signaling pathway	1	4	0.244434	0.72853	Mm06G014582
GO:0038107	nodal signaling pathway involved in determination of left/right asymmetry	1	4	0.244434	0.72853	Mm06G014582
GO:0042539	hypotonic salinity response	1	4	0.244434	0.72853	MmUnG043085
GO:0043157	response to cation stress	1	4	0.244434	0.72853	Mm01G001946
GO:0044380	protein localization to cytoskeleton	1	4	0.244434	0.72853	Mm11G027133
GO:0046443	FAD metabolic process	1	4	0.244434	0.72853	Mm01G002957
GO:0048308	organelle inheritance	1	4	0.244434	0.72853	MmUnG045896
GO:0048368	lateral mesoderm development	1	4	0.244434	0.72853	Mm06G014582
GO:0048483	autonomic nervous system development	1	4	0.244434	0.72853	Mm06G014582
GO:0048484	enteric nervous system development	1	4	0.244434	0.72853	Mm06G014582
GO:0048838	release of seed from dormancy	1	4	0.244434	0.72853	Mm07G018237
GO:0051290	protein heterotetramerization	1	4	0.244434	0.72853	Mm08G020143
GO:0060485	mesenchyme development	1	4	0.244434	0.72853	Mm06G014582
GO:0061488	adenine import into cell	1	4	0.244434	0.72853	MmUnG045880
GO:0061489	guanine import into cell	1	4	0.244434	0.72853	MmUnG045880
GO:0061635	regulation of protein complex stability	1	4	0.244434	0.72853	Mm05G012370
GO:0072698	protein localization to microtubule cytoskeleton	1	4	0.244434	0.72853	Mm11G027133
GO:0080038	positive regulation of cytokinin-activated signaling pathway	1	4	0.244434	0.72853	Mm14G032085
GO:0097192	extrinsic apoptotic signaling pathway in absence of ligand	1	4	0.244434	0.72853	Mm07G016721
GO:0097438	exit from dormancy	1	4	0.244434	0.72853	Mm07G018237
GO:0098702	adenine import across plasma membrane	1	4	0.244434	0.72853	MmUnG045880
GO:0098710	guanine import across plasma membrane	1	4	0.244434	0.72853	MmUnG045880
GO:0098721	uracil import across plasma membrane	1	4	0.244434	0.72853	MmUnG045880
GO:1900094	regulation of transcription from RNA polymerase II promoter involved in determination of left/right symmetry	1	4	0.244434	0.72853	Mm06G014582
GO:1900107	regulation of nodal signaling pathway	1	4	0.244434	0.72853	Mm06G014582
GO:1900108	negative regulation of nodal signaling pathway	1	4	0.244434	0.72853	Mm06G014582
GO:1900145	regulation of nodal signaling pathway involved in determination of left/right asymmetry	1	4	0.244434	0.72853	Mm06G014582
GO:1900146	negative regulation of nodal signaling pathway involved in determination of left/right asymmetry	1	4	0.244434	0.72853	Mm06G014582
GO:1900164	nodal signaling pathway involved in determination of lateral mesoderm left/right asymmetry	1	4	0.244434	0.72853	Mm06G014582
GO:1900175	regulation of nodal signaling pathway involved in determination of lateral mesoderm left/right asymmetry	1	4	0.244434	0.72853	Mm06G014582
GO:1900176	negative regulation of nodal signaling pathway involved in determination of lateral mesoderm left/right asymmetry	1	4	0.244434	0.72853	Mm06G014582
GO:1900910	positive regulation of olefin metabolic process	1	4	0.244434	0.72853	Mm02G004662
GO:1900913	positive regulation of olefin biosynthetic process	1	4	0.244434	0.72853	Mm02G004662
GO:1901099	negative regulation of signal transduction in absence of ligand	1	4	0.244434	0.72853	Mm07G016721
GO:1902431	uracil import into cell	1	4	0.244434	0.72853	MmUnG045880
GO:1903352	L-ornithine transmembrane transport	1	4	0.244434	0.72853	Mm17G036778
GO:1903716	guanine transmembrane transport	1	4	0.244434	0.72853	MmUnG045880
GO:2000380	regulation of mesoderm development	1	4	0.244434	0.72853	Mm06G014582
GO:2000381	negative regulation of mesoderm development	1	4	0.244434	0.72853	Mm06G014582
GO:2001239	regulation of extrinsic apoptotic signaling pathway in absence of ligand	1	4	0.244434	0.72853	Mm07G016721
GO:2001240	negative regulation of extrinsic apoptotic signaling pathway in absence of ligand	1	4	0.244434	0.72853	Mm07G016721
GO:0009112	nucleobase metabolic process	5	50	0.248351	0.738325	Mm02G003796;Mm04G009546;Mm04G010064;Mm07G016579;Mm14G033093
GO:0016032	viral process	5	50	0.248351	0.738325	Mm04G008930;Mm09G022080;Mm11G026491;Mm14G033223;MmUnG046009
GO:1990542	mitochondrial transmembrane transport	5	50	0.248351	0.738325	Mm02G004082;Mm02G004133;Mm13G029855;Mm13G031168;Mm16G036580
GO:0097305	response to alcohol	75	1025	0.251042	0.745693	Mm01G000619;Mm01G000620;Mm01G002102;Mm01G003281;Mm01G003560;Mm02G004048;Mm02G004055;Mm02G004240;Mm02G004568;Mm02G005335;Mm02G005361;Mm02G005742;Mm02G005975;Mm02G006288;Mm03G006667;Mm03G006808;Mm03G006866;Mm03G007044;Mm03G007145;Mm04G009816;Mm04G010003;Mm04G011105;Mm05G012615;Mm05G012861;Mm05G013158;Mm05G013564;Mm06G014139;Mm06G015832;Mm06G015945;Mm06G016155;Mm06G016256;Mm07G017309;Mm07G017321;Mm0…
GO:0035239	tube morphogenesis	4	38	0.254224	0.753232	Mm01G003113;Mm02G003859;Mm19G040682;MmUnG041859
GO:0050767	regulation of neurogenesis	4	38	0.254224	0.753232	Mm01G003113;Mm11G026595;Mm19G040682;MmUnG041859
GO:1900618	regulation of shoot system morphogenesis	4	38	0.254224	0.753232	Mm02G006288;Mm11G026542;Mm11G027108;Mm14G032227
GO:0001816	cytokine production	3	26	0.256032	0.754134	Mm07G019037;Mm11G026586;Mm12G027798
GO:0006787	porphyrin-containing compound catabolic process	3	26	0.256032	0.754134	Mm09G022819;Mm11G025968;Mm19G041329
GO:0006817	phosphate ion transport	3	26	0.256032	0.754134	Mm04G008907;Mm14G032114;Mm16G035128
GO:0007610	behavior	3	26	0.256032	0.754134	Mm01G003113;Mm06G015832;MmUnG041859
GO:0032204	regulation of telomere maintenance	3	26	0.256032	0.754134	Mm04G009716;Mm11G026586;MmUnG044681
GO:0033015	tetrapyrrole catabolic process	3	26	0.256032	0.754134	Mm09G022819;Mm11G025968;Mm19G041329
GO:0042692	muscle cell differentiation	3	26	0.256032	0.754134	Mm02G003859;Mm06G015873;Mm16G036446
GO:0051241	negative regulation of multicellular organismal process	19	238	0.259351	0.763271	Mm01G003113;Mm01G003438;Mm03G008617;Mm04G009764;Mm06G014582;Mm07G016671;Mm07G018237;Mm08G019755;Mm08G020035;Mm11G026542;Mm13G031504;Mm14G032821;Mm14G032968;Mm18G039716;MmUnG041859;MmUnG042583;MmUnG042784;MmUnG044145;MmUnG046280
GO:0010876	lipid localization	12	143	0.261124	0.767845	Mm07G017309;Mm08G019412;Mm08G019827;Mm09G022612;Mm13G029853;Mm13G030878;Mm13G030910;Mm19G040551;Mm19G040966;Mm19G041282;MmUnG042654;MmUnG045114
GO:0010017	red or far-red light signaling pathway	5	51	0.261381	0.767957	Mm03G007145;Mm03G008251;Mm08G020935;Mm16G035420;MmUnG042784
GO:0034968	histone lysine methylation	8	90	0.263494	0.772871	Mm01G001432;Mm04G008930;Mm07G018726;Mm11G025949;Mm12G028424;Mm16G036396;Mm18G039051;Mm18G039057
GO:0045333	cellular respiration	8	90	0.263494	0.772871	Mm04G009951;Mm07G018703;Mm08G019669;Mm11G026864;Mm12G029280;Mm18G039163;Mm19G040452;MmUnG045097
GO:0044038	cell wall macromolecule biosynthetic process	7	77	0.264495	0.773905	Mm01G002619;Mm01G002625;Mm10G024791;Mm14G032476;Mm15G034693;Mm16G035156;MmUnG045228
GO:0070589	cellular component macromolecule biosynthetic process	7	77	0.264495	0.773905	Mm01G002619;Mm01G002625;Mm10G024791;Mm14G032476;Mm15G034693;Mm16G035156;MmUnG045228
GO:0007399	nervous system development	10	117	0.267782	0.773905	Mm01G000612;Mm01G001432;Mm01G003113;Mm06G014582;Mm06G015832;Mm07G017418;Mm11G026595;Mm16G036093;Mm19G040682;MmUnG041859
GO:0007165	signal transduction	151	2127	0.268267	0.773905	Mm01G000612;Mm01G000986;Mm01G001106;Mm01G001153;Mm01G001220;Mm01G001432;Mm01G001445;Mm01G001463;Mm01G001472;Mm01G001474;Mm01G001490;Mm01G001901;Mm01G001959;Mm01G001987;Mm01G002030;Mm01G002378;Mm01G003113;Mm01G003313;Mm01G003438;Mm02G003938;Mm02G004048;Mm02G004055;Mm02G004240;Mm02G004262;Mm02G004533;Mm02G004662;Mm02G004697;Mm02G004928;Mm02G005361;Mm02G005848;Mm02G005856;Mm02G006288;Mm03G006776;Mm0…
GO:0005985	sucrose metabolic process	4	39	0.269466	0.773905	Mm05G013579;Mm07G018700;Mm08G019835;Mm13G030075
GO:0006826	iron ion transport	4	39	0.269466	0.773905	Mm03G007170;Mm07G017654;Mm07G017682;Mm09G022819
GO:0007088	regulation of mitotic nuclear division	4	39	0.269466	0.773905	Mm02G004262;Mm02G004533;Mm03G006563;Mm08G019755
GO:0001504	neurotransmitter uptake	2	15	0.269798	0.773905	Mm08G020616;Mm08G020619
GO:0006182	cGMP biosynthetic process	2	15	0.269798	0.773905	Mm01G001463;Mm01G001472
GO:0006880	intracellular sequestering of iron ion	2	15	0.269798	0.773905	Mm07G017654;Mm07G017682
GO:0009262	deoxyribonucleotide metabolic process	2	15	0.269798	0.773905	Mm01G002717;Mm19G039901
GO:0010262	somatic embryogenesis	2	15	0.269798	0.773905	Mm01G000832;Mm01G000913
GO:0015713	phosphoglycerate transport	2	15	0.269798	0.773905	Mm03G008128;Mm03G008130
GO:0032210	regulation of telomere maintenance via telomerase	2	15	0.269798	0.773905	Mm04G009716;MmUnG044681
GO:0032481	positive regulation of type I interferon production	2	15	0.269798	0.773905	Mm07G019037;Mm11G026586
GO:0043092	L-amino acid import	2	15	0.269798	0.773905	Mm08G020616;Mm08G020619
GO:0046068	cGMP metabolic process	2	15	0.269798	0.773905	Mm01G001463;Mm01G001472
GO:0051938	L-glutamate import	2	15	0.269798	0.773905	Mm08G020616;Mm08G020619
GO:0052541	plant-type cell wall cellulose metabolic process	2	15	0.269798	0.773905	Mm07G017201;MmUnG045228
GO:0071219	cellular response to molecule of bacterial origin	2	15	0.269798	0.773905	Mm10G024617;MmUnG043500
GO:0089711	L-glutamate transmembrane transport	2	15	0.269798	0.773905	Mm08G020616;Mm08G020619
GO:0089718	amino acid import across plasma membrane	2	15	0.269798	0.773905	Mm08G020616;Mm08G020619
GO:0097577	sequestering of iron ion	2	15	0.269798	0.773905	Mm07G017654;Mm07G017682
GO:0098712	L-glutamate import across plasma membrane	2	15	0.269798	0.773905	Mm08G020616;Mm08G020619
GO:1902837	amino acid import into cell	2	15	0.269798	0.773905	Mm08G020616;Mm08G020619
GO:1903802	L-glutamate(1-) import into cell	2	15	0.269798	0.773905	Mm08G020616;Mm08G020619
GO:1990123	L-glutamate import into cell	2	15	0.269798	0.773905	Mm08G020616;Mm08G020619
GO:0046907	intracellular transport	65	889	0.27122	0.777351	Mm01G001369;Mm01G001589;Mm01G001899;Mm02G004082;Mm02G004133;Mm02G004262;Mm02G004959;Mm02G004960;Mm02G005075;Mm02G005077;Mm02G005411;Mm02G005961;Mm02G006073;Mm03G006808;Mm03G007357;Mm04G009631;Mm04G009672;Mm04G010171;Mm04G010398;Mm04G010691;Mm04G010704;Mm05G012458;Mm05G012489;Mm05G013457;Mm06G015322;Mm06G015832;Mm06G015873;Mm06G016042;Mm06G016080;Mm07G017368;Mm07G019154;Mm08G019412;Mm08G019755;Mm0…
GO:0051179	localization	204	2899	0.271664	0.777987	Mm01G000443;Mm01G000612;Mm01G001369;Mm01G001589;Mm01G001899;Mm01G001946;Mm01G003113;Mm01G003425;Mm02G004048;Mm02G004055;Mm02G004082;Mm02G004133;Mm02G004262;Mm02G004959;Mm02G004960;Mm02G004974;Mm02G005067;Mm02G005075;Mm02G005077;Mm02G005411;Mm02G005700;Mm02G005759;Mm02G005961;Mm02G006026;Mm02G006073;Mm02G006308;Mm03G006808;Mm03G007066;Mm03G007170;Mm03G007350;Mm03G007357;Mm03G008128;Mm03G008130;Mm0…
GO:0034613	cellular protein localization	44	591	0.274006	0.781817	Mm01G001369;Mm01G001899;Mm02G004082;Mm02G004133;Mm02G004262;Mm02G004959;Mm02G004960;Mm02G005075;Mm02G005077;Mm02G005411;Mm03G006808;Mm04G009631;Mm04G010171;Mm04G010398;Mm04G010461;Mm04G010487;Mm04G010704;Mm05G012458;Mm05G012489;Mm05G013457;Mm06G015322;Mm06G015873;Mm07G017368;Mm07G019154;Mm08G019755;Mm08G021065;Mm10G024805;Mm10G024923;Mm11G027133;Mm12G027798;Mm12G029046;Mm13G029855;Mm13G031117;Mm1…
GO:0072530	purine-containing compound transmembrane transport	5	52	0.274564	0.781817	Mm01G003425;Mm02G005700;Mm13G030975;MmUnG043657;MmUnG045880
GO:0090332	stomatal closure	5	52	0.274564	0.781817	Mm04G009349;Mm11G025987;Mm11G027129;Mm17G037647;MmUnG044966
GO:0010112	regulation of systemic acquired resistance	3	27	0.274783	0.781817	Mm10G024617;Mm18G039051;Mm18G039057
GO:0070726	cell wall assembly	3	27	0.274783	0.781817	Mm11G026758;Mm11G027133;Mm13G030878
GO:0071218	cellular response to misfolded protein	3	27	0.274783	0.781817	Mm05G012370;Mm12G029054;Mm12G029060
GO:0071577	zinc II ion transmembrane transport	3	27	0.274783	0.781817	Mm03G007170;Mm04G009439;Mm07G018241
GO:0071668	plant-type cell wall assembly	3	27	0.274783	0.781817	Mm11G026758;Mm11G027133;Mm13G030878
GO:0000902	cell morphogenesis	46	620	0.276465	0.7844	Mm01G000612;Mm01G001499;Mm01G002008;Mm01G002619;Mm01G002625;Mm02G004262;Mm02G005975;Mm03G006505;Mm03G007145;Mm04G010289;Mm04G010461;Mm04G010487;Mm05G012054;Mm05G012370;Mm05G012770;Mm05G013158;Mm06G016256;Mm07G016854;Mm07G017201;Mm07G017726;Mm07G018468;Mm08G019835;Mm08G019998;Mm08G019999;Mm08G020004;Mm11G026595;Mm11G026999;Mm14G031738;Mm14G032476;Mm14G033453;Mm15G034293;Mm15G034305;Mm16G036093;Mm1…
GO:0098662	inorganic cation transmembrane transport	37	493	0.277951	0.7844	Mm01G000443;Mm02G004048;Mm02G004055;Mm02G006026;Mm03G007170;Mm04G008790;Mm04G008795;Mm04G009094;Mm04G009349;Mm04G009439;Mm04G009657;Mm06G015832;Mm06G015873;Mm07G016854;Mm07G017838;Mm07G018241;Mm07G019324;Mm10G025057;Mm12G029137;Mm12G029210;Mm12G029486;Mm12G029507;Mm14G032114;Mm14G032807;Mm14G033555;Mm15G034182;Mm16G036446;Mm17G037647;Mm18G038806;Mm19G040611;Mm19G041159;MmUnG041697;MmUnG041876;MmU…
GO:0009719	response to endogenous stimulus	182	2584	0.281852	0.7844	Mm01G000619;Mm01G000620;Mm01G001138;Mm01G001318;Mm01G001369;Mm01G001463;Mm01G001472;Mm01G001674;Mm01G001837;Mm01G001854;Mm01G002102;Mm01G002373;Mm01G002378;Mm01G003438;Mm01G003560;Mm02G003938;Mm02G004048;Mm02G004055;Mm02G004082;Mm02G004133;Mm02G004240;Mm02G004262;Mm02G004473;Mm02G004568;Mm02G004697;Mm02G005335;Mm02G005361;Mm02G005742;Mm02G005975;Mm02G006288;Mm03G006667;Mm03G006776;Mm03G006808;Mm0…
GO:0006820	anion transport	42	565	0.283136	0.7844	Mm01G001589;Mm02G004974;Mm02G005067;Mm02G005759;Mm03G007066;Mm03G007350;Mm03G008128;Mm03G008130;Mm04G008907;Mm05G012466;Mm05G012498;Mm05G013588;Mm05G013602;Mm07G017309;Mm07G019138;Mm08G019412;Mm08G019827;Mm08G020616;Mm08G020619;Mm09G022612;Mm11G026482;Mm11G026864;Mm11G027554;Mm12G029507;Mm13G029853;Mm13G030878;Mm14G031823;Mm14G032114;Mm15G034473;Mm16G035128;Mm16G035214;Mm17G036778;Mm18G038811;Mm1…
GO:0007166	cell surface receptor signaling pathway	35	466	0.283214	0.7844	Mm01G001220;Mm01G001445;Mm01G001463;Mm01G001472;Mm01G001474;Mm01G001490;Mm01G001901;Mm01G001959;Mm01G001987;Mm01G002030;Mm01G003113;Mm01G003313;Mm02G004262;Mm02G005848;Mm02G005856;Mm04G008863;Mm04G008864;Mm05G012648;Mm05G012770;Mm05G012854;Mm06G014582;Mm06G015621;Mm07G016721;Mm08G019998;Mm08G019999;Mm08G020004;Mm13G031139;Mm16G036220;Mm18G038799;Mm19G041257;Mm19G041423;MmUnG041859;MmUnG042070;MmU…
GO:0009900	dehiscence	4	40	0.284862	0.7844	Mm02G004021;Mm08G020743;Mm11G027133;Mm11G027349
GO:0015780	nucleotide-sugar transport	4	40	0.284862	0.7844	Mm05G013588;Mm05G013602;Mm13G030975;Mm18G039510
GO:0006888	ER to Golgi vesicle-mediated transport	7	79	0.285929	0.7844	Mm02G004959;Mm02G004960;Mm02G005075;Mm02G005077;Mm06G015873;Mm06G016042;Mm06G016080
GO:0043066	negative regulation of apoptotic process	5	53	0.287881	0.7844	Mm02G004262;Mm07G016721;Mm11G027133;Mm14G032085;Mm16G036446
GO:0009793	embryo development ending in seed dormancy	41	553	0.29193	0.7844	Mm01G000832;Mm01G000913;Mm01G001431;Mm01G002717;Mm01G003383;Mm02G004697;Mm03G006776;Mm04G009284;Mm04G009542;Mm04G009726;Mm04G009736;Mm04G010003;Mm05G013564;Mm06G014911;Mm07G016361;Mm07G016470;Mm07G016725;Mm07G016752;Mm07G016854;Mm07G017309;Mm07G017416;Mm07G018949;Mm11G025348;Mm11G027001;Mm12G027690;Mm12G028492;Mm13G030039;Mm14G032996;Mm14G033327;Mm14G033426;Mm14G033462;Mm16G036446;Mm17G036675;Mm1…
GO:0006818	hydrogen transport	12	147	0.292282	0.7844	Mm03G007350;Mm04G008795;Mm04G009094;Mm04G009349;Mm07G019324;Mm12G028676;Mm12G029137;Mm14G032114;Mm18G038806;Mm19G041159;MmUnG044154;MmUnG044966
GO:0015992	proton transport	12	147	0.292282	0.7844	Mm03G007350;Mm04G008795;Mm04G009094;Mm04G009349;Mm07G019324;Mm12G028676;Mm12G029137;Mm14G032114;Mm18G038806;Mm19G041159;MmUnG044154;MmUnG044966
GO:0043255	regulation of carbohydrate biosynthetic process	3	28	0.293665	0.7844	Mm12G028264;MmUnG042483;MmUnG045228
GO:0050821	protein stabilization	3	28	0.293665	0.7844	Mm01G001899;Mm06G015873;MmUnG044681
GO:0061061	muscle structure development	3	28	0.293665	0.7844	Mm02G003859;Mm06G015873;Mm16G036446
GO:2000278	regulation of DNA biosynthetic process	3	28	0.293665	0.7844	Mm02G005361;Mm04G009716;MmUnG044681
GO:0001709	cell fate determination	2	16	0.295564	0.7844	Mm01G003113;MmUnG041859
GO:0006465	signal peptide processing	2	16	0.295564	0.7844	Mm14G032333;MmUnG041986
GO:0006561	proline biosynthetic process	2	16	0.295564	0.7844	Mm03G008617;Mm14G033462
GO:0009269	response to desiccation	2	16	0.295564	0.7844	Mm01G003560;Mm08G020226
GO:0016122	xanthophyll metabolic process	2	16	0.295564	0.7844	Mm03G006613;Mm07G019138
GO:0032411	positive regulation of transporter activity	2	16	0.295564	0.7844	Mm06G015873;Mm12G028676
GO:0032414	positive regulation of ion transmembrane transporter activity	2	16	0.295564	0.7844	Mm06G015873;Mm12G028676
GO:0035435	phosphate ion transmembrane transport	2	16	0.295564	0.7844	Mm14G032114;Mm16G035128
GO:0042873	aldonate transport	2	16	0.295564	0.7844	Mm03G008128;Mm03G008130
GO:0048477	oogenesis	2	16	0.295564	0.7844	Mm01G003113;MmUnG041859
GO:0051146	striated muscle cell differentiation	2	16	0.295564	0.7844	Mm02G003859;Mm16G036446
GO:0071712	ER-associated misfolded protein catabolic process	2	16	0.295564	0.7844	Mm12G029054;Mm12G029060
GO:1904356	regulation of telomere maintenance via telomere lengthening	2	16	0.295564	0.7844	Mm04G009716;MmUnG044681
GO:0000349	generation of catalytic spliceosome for first transesterification step	1	5	0.295574	0.7844	Mm06G014643
GO:0002028	regulation of sodium ion transport	1	5	0.295574	0.7844	Mm06G015832
GO:0006107	oxaloacetate metabolic process	1	5	0.295574	0.7844	Mm18G039163
GO:0006121	mitochondrial electron transport, succinate to ubiquinone	1	5	0.295574	0.7844	Mm19G040452
GO:0006122	mitochondrial electron transport, ubiquinol to cytochrome c	1	5	0.295574	0.7844	Mm08G019669
GO:0006388	tRNA splicing, via endonucleolytic cleavage and ligation	1	5	0.295574	0.7844	Mm03G006776
GO:0006538	glutamate catabolic process	1	5	0.295574	0.7844	Mm08G019835
GO:0006540	glutamate decarboxylation to succinate	1	5	0.295574	0.7844	Mm08G019835
GO:0006656	phosphatidylcholine biosynthetic process	1	5	0.295574	0.7844	Mm14G031738
GO:0007612	learning	1	5	0.295574	0.7844	Mm06G015832
GO:0008340	determination of adult lifespan	1	5	0.295574	0.7844	Mm13G031139
GO:0009061	anaerobic respiration	1	5	0.295574	0.7844	Mm19G040452
GO:0009148	pyrimidine nucleoside triphosphate biosynthetic process	1	5	0.295574	0.7844	Mm01G002717
GO:0009202	deoxyribonucleoside triphosphate biosynthetic process	1	5	0.295574	0.7844	Mm01G002717
GO:0009223	pyrimidine deoxyribonucleotide catabolic process	1	5	0.295574	0.7844	Mm19G039901
GO:0009448	gamma-aminobutyric acid metabolic process	1	5	0.295574	0.7844	Mm08G019835
GO:0009450	gamma-aminobutyric acid catabolic process	1	5	0.295574	0.7844	Mm08G019835
GO:0009957	epidermal cell fate specification	1	5	0.295574	0.7844	Mm17G036706
GO:0010071	root meristem specification	1	5	0.295574	0.7844	Mm04G009542
GO:0010451	floral meristem growth	1	5	0.295574	0.7844	Mm14G032996
GO:0010644	cell communication by electrical coupling	1	5	0.295574	0.7844	Mm06G015832
GO:0015855	pyrimidine nucleobase transport	1	5	0.295574	0.7844	MmUnG045880
GO:0015857	uracil transport	1	5	0.295574	0.7844	MmUnG045880
GO:0021954	central nervous system neuron development	1	5	0.295574	0.7844	Mm07G017418
GO:0030643	cellular phosphate ion homeostasis	1	5	0.295574	0.7844	Mm16G035587
GO:0031221	arabinan metabolic process	1	5	0.295574	0.7844	Mm10G024791
GO:0031539	positive regulation of anthocyanin metabolic process	1	5	0.295574	0.7844	Mm17G036706
GO:0032608	interferon-beta production	1	5	0.295574	0.7844	Mm07G019037
GO:0032648	regulation of interferon-beta production	1	5	0.295574	0.7844	Mm07G019037
GO:0032728	positive regulation of interferon-beta production	1	5	0.295574	0.7844	Mm07G019037
GO:0032872	regulation of stress-activated MAPK cascade	1	5	0.295574	0.7844	Mm01G000612
GO:0033143	regulation of intracellular steroid hormone receptor signaling pathway	1	5	0.295574	0.7844	Mm05G013150
GO:0034975	protein folding in endoplasmic reticulum	1	5	0.295574	0.7844	Mm12G028757
GO:0042245	RNA repair	1	5	0.295574	0.7844	Mm03G006776
GO:0044090	positive regulation of vacuole organization	1	5	0.295574	0.7844	Mm04G010691
GO:0045840	positive regulation of mitotic nuclear division	1	5	0.295574	0.7844	Mm02G004262
GO:0045962	positive regulation of development, heterochronic	1	5	0.295574	0.7844	Mm11G025348
GO:0046328	regulation of JNK cascade	1	5	0.295574	0.7844	Mm01G000612
GO:0046578	regulation of Ras protein signal transduction	1	5	0.295574	0.7844	Mm11G026595
GO:0046580	negative regulation of Ras protein signal transduction	1	5	0.295574	0.7844	Mm11G026595
GO:0050435	beta-amyloid metabolic process	1	5	0.295574	0.7844	Mm13G031139
GO:0051056	regulation of small GTPase mediated signal transduction	1	5	0.295574	0.7844	Mm11G026595
GO:0051058	negative regulation of small GTPase mediated signal transduction	1	5	0.295574	0.7844	Mm11G026595
GO:0061041	regulation of wound healing	1	5	0.295574	0.7844	Mm16G036446
GO:0070198	protein localization to chromosome, telomeric region	1	5	0.295574	0.7844	MmUnG044681
GO:0070302	regulation of stress-activated protein kinase signaling cascade	1	5	0.295574	0.7844	Mm01G000612
GO:0070900	mitochondrial tRNA modification	1	5	0.295574	0.7844	Mm01G000154
GO:0070902	mitochondrial tRNA pseudouridine synthesis	1	5	0.295574	0.7844	Mm01G000154
GO:0072337	modified amino acid transport	1	5	0.295574	0.7844	Mm14G031823
GO:0072502	cellular trivalent inorganic anion homeostasis	1	5	0.295574	0.7844	Mm16G035587
GO:0080024	indolebutyric acid metabolic process	1	5	0.295574	0.7844	Mm01G001589
GO:0090058	metaxylem development	1	5	0.295574	0.7844	Mm05G012777
GO:0090303	positive regulation of wound healing	1	5	0.295574	0.7844	Mm16G036446
GO:0090646	mitochondrial tRNA processing	1	5	0.295574	0.7844	Mm01G000154
GO:0098501	polynucleotide dephosphorylation	1	5	0.295574	0.7844	Mm04G009716
GO:1900036	positive regulation of cellular response to heat	1	5	0.295574	0.7844	Mm18G038405
GO:1902478	negative regulation of defense response to bacterium, incompatible interaction	1	5	0.295574	0.7844	Mm19G041016
GO:1903036	positive regulation of response to wounding	1	5	0.295574	0.7844	Mm16G036446
GO:1903791	uracil transmembrane transport	1	5	0.295574	0.7844	MmUnG045880
GO:1904082	pyrimidine nucleobase transmembrane transport	1	5	0.295574	0.7844	MmUnG045880
GO:0051093	negative regulation of developmental process	20	258	0.295941	0.784779	Mm01G003113;Mm01G003438;Mm03G008617;Mm04G009764;Mm06G014582;Mm07G016671;Mm07G018237;Mm08G019755;Mm08G020035;Mm11G026542;Mm13G031504;Mm14G032821;Mm14G032968;Mm16G035214;Mm18G039716;MmUnG041859;MmUnG042583;MmUnG042784;MmUnG044145;MmUnG046280
GO:0000271	polysaccharide biosynthetic process	16	203	0.299528	0.793692	Mm01G002619;Mm01G002625;Mm01G003560;Mm04G009158;Mm04G009839;Mm08G020226;Mm10G024791;Mm11G026870;Mm11G027133;Mm12G028249;Mm12G028264;Mm14G032476;Mm15G034693;Mm16G035156;MmUnG042483;MmUnG045228
GO:0007186	G-protein coupled receptor signaling pathway	4	41	0.300381	0.794155	Mm04G009542;Mm04G009866;Mm04G009888;Mm16G035732
GO:1902905	positive regulation of fibril organization	4	41	0.300381	0.794155	Mm01G001499;Mm01G002008;Mm02G003859;Mm19G041005
GO:1903055	positive regulation of extracellular matrix organization	4	41	0.300381	0.794155	Mm01G001499;Mm01G002008;Mm02G003859;Mm19G041005
GO:0006886	intracellular protein transport	35	470	0.300896	0.794821	Mm01G001369;Mm01G001899;Mm02G004082;Mm02G004133;Mm02G004262;Mm02G004959;Mm02G004960;Mm02G005075;Mm02G005077;Mm02G005411;Mm03G006808;Mm04G009631;Mm04G010171;Mm04G010398;Mm04G010704;Mm05G012458;Mm05G012489;Mm05G013457;Mm06G015322;Mm07G017368;Mm07G019154;Mm08G019755;Mm08G021065;Mm10G024805;Mm10G024923;Mm12G027798;Mm12G029046;Mm13G029855;Mm13G031117;Mm13G031139;Mm13G031168;Mm16G036580;Mm18G039092;MmU…
GO:0007584	response to nutrient	5	54	0.301312	0.794821	Mm01G001854;Mm06G013914;Mm06G015832;Mm10G025057;Mm13G030562
GO:2001251	negative regulation of chromosome organization	5	54	0.301312	0.794821	Mm05G013158;Mm07G017240;Mm08G019755;Mm18G039051;Mm18G039057
GO:0009896	positive regulation of catabolic process	10	121	0.302731	0.797965	Mm02G003859;Mm05G013150;Mm06G016121;Mm06G016310;Mm12G028860;Mm13G031123;Mm13G031139;Mm14G032085;Mm17G037536;MmUnG042812
GO:0045787	positive regulation of cell cycle	7	81	0.307755	0.810598	Mm02G004262;Mm04G009950;Mm04G009951;Mm06G016083;Mm16G036446;Mm17G037550;MmUnG041650
GO:0032990	cell part morphogenesis	6	68	0.311754	0.820349	Mm01G000612;Mm05G012770;Mm11G026595;Mm14G032085;Mm16G036093;Mm19G040682
GO:0009833	plant-type primary cell wall biogenesis	3	29	0.312625	0.820349	Mm04G009158;Mm11G027133;Mm12G028249
GO:0030838	positive regulation of actin filament polymerization	3	29	0.312625	0.820349	Mm01G001499;Mm01G002008;Mm19G041005
GO:0045010	actin nucleation	3	29	0.312625	0.820349	Mm01G001499;Mm01G002008;Mm19G041005
GO:0051303	establishment of chromosome localization	3	29	0.312625	0.820349	Mm04G010461;Mm04G010487;Mm08G021065
GO:0051054	positive regulation of DNA metabolic process	5	55	0.314837	0.825536	Mm02G005361;Mm04G009716;Mm11G026586;Mm16G036446;MmUnG044681
GO:0048868	pollen tube development	16	206	0.3201	0.834715	Mm01G002619;Mm01G002625;Mm03G006505;Mm04G010289;Mm07G016470;Mm07G017726;Mm07G018468;Mm07G018703;Mm07G018949;Mm08G019835;Mm11G027133;Mm14G031738;Mm14G032476;Mm16G036458;MmUnG043393;MmUnG045834
GO:0010029	regulation of seed germination	10	123	0.32062	0.834715	Mm03G006945;Mm04G009242;Mm07G018237;Mm07G019394;Mm09G022819;Mm11G026864;Mm13G031374;Mm16G035430;MmUnG041583;MmUnG043640
GO:0070417	cellular response to cold	10	123	0.32062	0.834715	Mm01G003560;Mm04G009053;Mm05G011543;Mm07G019105;Mm08G020226;Mm09G022819;Mm11G025949;Mm12G028264;Mm18G039352;MmUnG042483
GO:0006084	acetyl-CoA metabolic process	2	17	0.321191	0.834715	Mm03G006888;Mm12G028604
GO:0006903	vesicle targeting	2	17	0.321191	0.834715	Mm03G007357;MmUnG041576
GO:0010310	regulation of hydrogen peroxide metabolic process	2	17	0.321191	0.834715	Mm12G028944;Mm13G030562
GO:0015908	fatty acid transport	2	17	0.321191	0.834715	Mm07G017309;Mm13G030878
GO:0031119	tRNA pseudouridine synthesis	2	17	0.321191	0.834715	Mm01G000154;Mm04G009981
GO:0034629	cellular protein complex localization	2	17	0.321191	0.834715	Mm15G033828;Mm16G035185
GO:0035461	vitamin transmembrane transport	2	17	0.321191	0.834715	Mm07G019138;Mm12G029507
GO:0048732	gland development	2	17	0.321191	0.834715	Mm01G003113;MmUnG041859
GO:0051180	vitamin transport	2	17	0.321191	0.834715	Mm07G019138;Mm12G029507
GO:0009644	response to high light intensity	11	137	0.322833	0.838362	Mm04G009242;Mm04G009392;Mm04G009492;Mm06G015712;Mm07G017480;Mm11G026624;Mm12G028494;Mm13G030422;Mm18G039346;Mm19G040917;MmUnG043360
GO:0043200	response to amino acid	5	56	0.328437	0.851656	Mm01G001369;Mm02G004048;Mm02G004055;Mm02G004697;Mm07G017838
GO:0045927	positive regulation of growth	5	56	0.328437	0.851656	Mm02G004697;Mm07G018468;Mm11G026595;Mm14G032085;Mm16G036446
GO:0015833	peptide transport	46	634	0.330929	0.853114	Mm01G001369;Mm01G001899;Mm02G004082;Mm02G004133;Mm02G004262;Mm02G004959;Mm02G004960;Mm02G005075;Mm02G005077;Mm02G005411;Mm03G006808;Mm03G008461;Mm04G009631;Mm04G010171;Mm04G010398;Mm04G010704;Mm05G012458;Mm05G012489;Mm05G012648;Mm05G012781;Mm05G013457;Mm06G015322;Mm06G016166;Mm07G016854;Mm07G017368;Mm07G019154;Mm08G019755;Mm08G020086;Mm08G021065;Mm10G024805;Mm10G024923;Mm11G026586;Mm12G027798;Mm1…
GO:0071669	plant-type cell wall organization or biogenesis	28	377	0.331206	0.853114	Mm01G002619;Mm01G002625;Mm01G002627;Mm02G005321;Mm04G009158;Mm04G009726;Mm04G009736;Mm05G013153;Mm07G016361;Mm07G016752;Mm07G017201;Mm07G017321;Mm07G017324;Mm07G017330;Mm07G017331;Mm07G018949;Mm09G022576;Mm10G024791;Mm11G026259;Mm11G026758;Mm11G027133;Mm12G028249;Mm13G030878;Mm14G032476;Mm15G034693;Mm16G035156;Mm17G036912;MmUnG045228
GO:0000741	karyogamy	3	30	0.331613	0.853114	Mm03G006667;Mm11G027001;Mm14G031637
GO:0010030	positive regulation of seed germination	3	30	0.331613	0.853114	Mm04G009242;Mm07G018237;Mm07G019394
GO:0010197	polar nucleus fusion	3	30	0.331613	0.853114	Mm03G006667;Mm11G027001;Mm14G031637
GO:0070734	histone H3-K27 methylation	3	30	0.331613	0.853114	Mm01G001432;Mm07G018726;Mm11G025949
GO:0090333	regulation of stomatal closure	3	30	0.331613	0.853114	Mm04G009349;Mm17G037647;MmUnG044966
GO:2000027	regulation of organ morphogenesis	3	30	0.331613	0.853114	Mm01G003113;Mm05G012770;MmUnG041859
GO:0015850	organic hydroxy compound transport	4	43	0.331672	0.853114	Mm07G016854;Mm19G040551;Mm19G040966;Mm19G041282
GO:0071941	nitrogen cycle metabolic process	4	43	0.331672	0.853114	Mm02G005760;Mm07G018703;Mm11G026955;Mm16G035357
GO:0097164	ammonium ion metabolic process	4	43	0.331672	0.853114	Mm01G002102;Mm09G022792;Mm14G031738;MmUnG043371
GO:0000911	cytokinesis by cell plate formation	6	70	0.336093	0.856555	Mm04G009672;Mm07G017226;Mm13G030514;Mm13G030523;MmUnG041576;MmUnG043085
GO:0044700	single organism signaling	152	2173	0.337436	0.856555	Mm01G000612;Mm01G000986;Mm01G001106;Mm01G001153;Mm01G001220;Mm01G001432;Mm01G001445;Mm01G001463;Mm01G001472;Mm01G001474;Mm01G001490;Mm01G001901;Mm01G001959;Mm01G001987;Mm01G002030;Mm01G002378;Mm01G003113;Mm01G003313;Mm01G003438;Mm02G003938;Mm02G004048;Mm02G004055;Mm02G004240;Mm02G004262;Mm02G004533;Mm02G004662;Mm02G004697;Mm02G004928;Mm02G005361;Mm02G005848;Mm02G005856;Mm02G006288;Mm03G006776;Mm0…
GO:0009664	plant-type cell wall organization	16	209	0.341027	0.856555	Mm01G002619;Mm01G002625;Mm01G002627;Mm07G017201;Mm07G017321;Mm07G017324;Mm07G017330;Mm07G017331;Mm11G026259;Mm11G026758;Mm11G027133;Mm13G030878;Mm14G032476;Mm16G035156;Mm17G036912;MmUnG045228
GO:0023052	signaling	152	2175	0.342033	0.856555	Mm01G000612;Mm01G000986;Mm01G001106;Mm01G001153;Mm01G001220;Mm01G001432;Mm01G001445;Mm01G001463;Mm01G001472;Mm01G001474;Mm01G001490;Mm01G001901;Mm01G001959;Mm01G001987;Mm01G002030;Mm01G002378;Mm01G003113;Mm01G003313;Mm01G003438;Mm02G003938;Mm02G004048;Mm02G004055;Mm02G004240;Mm02G004262;Mm02G004533;Mm02G004662;Mm02G004697;Mm02G004928;Mm02G005361;Mm02G005848;Mm02G005856;Mm02G006288;Mm03G006776;Mm0…
GO:0051783	regulation of nuclear division	5	57	0.342093	0.856555	Mm01G001829;Mm02G004262;Mm02G004533;Mm03G006563;Mm08G019755
GO:0005980	glycogen catabolic process	1	6	0.343256	0.856555	Mm07G018226
GO:0006048	UDP-N-acetylglucosamine biosynthetic process	1	6	0.343256	0.856555	Mm01G001431
GO:0006083	acetate metabolic process	1	6	0.343256	0.856555	Mm06G015351
GO:0006103	2-oxoglutarate metabolic process	1	6	0.343256	0.856555	Mm16G036079
GO:0006244	pyrimidine nucleotide catabolic process	1	6	0.343256	0.856555	Mm19G039901
GO:0006620	posttranslational protein targeting to membrane	1	6	0.343256	0.856555	Mm18G039092
GO:0009098	leucine biosynthetic process	1	6	0.343256	0.856555	Mm06G014755
GO:0009265	2'-deoxyribonucleotide biosynthetic process	1	6	0.343256	0.856555	Mm01G002717
GO:0010045	response to nickel cation	1	6	0.343256	0.856555	MmUnG045484
GO:0015739	sialic acid transport	1	6	0.343256	0.856555	Mm18G038811
GO:0031099	regeneration	1	6	0.343256	0.856555	Mm16G036446
GO:0031936	negative regulation of chromatin silencing	1	6	0.343256	0.856555	Mm07G017240
GO:0032877	positive regulation of DNA endoreduplication	1	6	0.343256	0.856555	Mm16G036446
GO:0033240	positive regulation of cellular amine metabolic process	1	6	0.343256	0.856555	Mm02G004662
GO:0040001	establishment of mitotic spindle localization	1	6	0.343256	0.856555	Mm08G021065
GO:0043001	Golgi to plasma membrane protein transport	1	6	0.343256	0.856555	Mm12G027798
GO:0045764	positive regulation of cellular amino acid metabolic process	1	6	0.343256	0.856555	Mm02G004662
GO:0045912	negative regulation of carbohydrate metabolic process	1	6	0.343256	0.856555	Mm04G009716
GO:0046349	amino sugar biosynthetic process	1	6	0.343256	0.856555	Mm01G001431
GO:0046385	deoxyribose phosphate biosynthetic process	1	6	0.343256	0.856555	Mm01G002717
GO:0046901	tetrahydrofolylpolyglutamate biosynthetic process	1	6	0.343256	0.856555	MmUnG044342
GO:0048167	regulation of synaptic plasticity	1	6	0.343256	0.856555	Mm06G015832
GO:0048168	regulation of neuronal synaptic plasticity	1	6	0.343256	0.856555	Mm06G015832
GO:0048209	regulation of vesicle targeting, to, from or within Golgi	1	6	0.343256	0.856555	MmUnG041576
GO:0050764	regulation of phagocytosis	1	6	0.343256	0.856555	Mm18G039245
GO:0050773	regulation of dendrite development	1	6	0.343256	0.856555	Mm19G040682
GO:0051293	establishment of spindle localization	1	6	0.343256	0.856555	Mm08G021065
GO:0051653	spindle localization	1	6	0.343256	0.856555	Mm08G021065
GO:0070827	chromatin maintenance	1	6	0.343256	0.856555	Mm14G032085
GO:0071289	cellular response to nickel ion	1	6	0.343256	0.856555	MmUnG045484
GO:0072387	flavin adenine dinucleotide metabolic process	1	6	0.343256	0.856555	Mm01G002957
GO:0090002	establishment of protein localization to plasma membrane	1	6	0.343256	0.856555	Mm12G027798
GO:0090603	sieve element differentiation	1	6	0.343256	0.856555	Mm07G016854
GO:0097576	vacuole fusion	1	6	0.343256	0.856555	Mm08G020035
GO:1901019	regulation of calcium ion transmembrane transporter activity	1	6	0.343256	0.856555	Mm06G015873
GO:1901798	positive regulation of signal transduction by p53 class mediator	1	6	0.343256	0.856555	Mm01G001432
GO:1990138	neuron projection extension	1	6	0.343256	0.856555	Mm11G026595
GO:0006551	leucine metabolic process	2	18	0.346578	0.858385	Mm06G014755;Mm19G041329
GO:0008037	cell recognition	2	18	0.346578	0.858385	Mm19G040682;MmUnG044681
GO:0010413	glucuronoxylan metabolic process	2	18	0.346578	0.858385	Mm10G024791;Mm15G034693
GO:0010417	glucuronoxylan biosynthetic process	2	18	0.346578	0.858385	Mm10G024791;Mm15G034693
GO:0032479	regulation of type I interferon production	2	18	0.346578	0.858385	Mm07G019037;Mm11G026586
GO:0032606	type I interferon production	2	18	0.346578	0.858385	Mm07G019037;Mm11G026586
GO:0043486	histone exchange	2	18	0.346578	0.858385	Mm01G000612;Mm01G001432
GO:0045047	protein targeting to ER	2	18	0.346578	0.858385	Mm07G019154;Mm18G039092
GO:0051156	glucose 6-phosphate metabolic process	2	18	0.346578	0.858385	Mm02G004928;Mm11G025987
GO:0072599	establishment of protein localization to endoplasmic reticulum	2	18	0.346578	0.858385	Mm07G019154;Mm18G039092
GO:0035690	cellular response to drug	18	238	0.346679	0.858385	Mm01G002378;Mm01G003438;Mm05G012618;Mm05G013358;Mm07G019394;Mm12G028264;Mm13G031504;Mm14G032251;Mm14G032821;Mm14G032968;Mm15G034997;Mm18G039154;Mm19G040227;MmUnG042483;MmUnG042583;MmUnG043085;MmUnG043500;MmUnG045977
GO:0000027	ribosomal large subunit assembly	4	44	0.347386	0.85953	Mm12G028150;Mm18G039408;Mm19G041397;Mm19G041401
GO:0042133	neurotransmitter metabolic process	3	31	0.350582	0.866827	Mm08G019835;Mm11G026955;Mm14G031738
GO:0009987	cellular process	902	13264	0.35149	0.86846	Mm01G000154;Mm01G000231;Mm01G000274;Mm01G000322;Mm01G000443;Mm01G000463;Mm01G000612;Mm01G000619;Mm01G000620;Mm01G000986;Mm01G001057;Mm01G001106;Mm01G001138;Mm01G001153;Mm01G001220;Mm01G001283;Mm01G001318;Mm01G001346;Mm01G001369;Mm01G001382;Mm01G001431;Mm01G001432;Mm01G001445;Mm01G001463;Mm01G001472;Mm01G001474;Mm01G001484;Mm01G001490;Mm01G001499;Mm01G001589;Mm01G001674;Mm01G001720;Mm01G001726;Mm0…
GO:1900140	regulation of seedling development	10	127	0.357005	0.878976	Mm03G006945;Mm04G009242;Mm07G018237;Mm07G019394;Mm09G022819;Mm11G026864;Mm13G031374;Mm16G035430;MmUnG041583;MmUnG043640
GO:0009860	pollen tube growth	12	155	0.357332	0.878976	Mm01G002619;Mm01G002625;Mm03G006505;Mm04G010289;Mm07G017726;Mm07G018468;Mm08G019835;Mm14G031738;Mm14G032476;Mm16G036458;MmUnG043393;MmUnG045834
GO:1901135	carbohydrate derivative metabolic process	56	786	0.361636	0.878976	Mm01G001431;Mm01G001463;Mm01G001472;Mm01G002028;Mm01G002627;Mm01G002717;Mm01G003546;Mm01G003592;Mm02G004473;Mm02G004928;Mm02G005321;Mm03G006888;Mm03G007441;Mm04G009452;Mm04G009546;Mm04G009716;Mm04G010918;Mm04G010922;Mm05G012219;Mm05G012645;Mm06G015411;Mm07G016630;Mm07G017418;Mm07G019154;Mm08G019669;Mm09G023196;Mm10G025034;Mm11G025602;Mm11G025662;Mm11G025987;Mm11G025997;Mm11G026364;Mm12G028604;Mm1…
GO:0016311	dephosphorylation	25	340	0.362106	0.878976	Mm01G000463;Mm01G003108;Mm02G005935;Mm02G006288;Mm04G009716;Mm04G009726;Mm04G009736;Mm05G012861;Mm05G013149;Mm06G014139;Mm06G016155;Mm07G016361;Mm07G016752;Mm07G018237;Mm07G018845;Mm11G026873;Mm11G026999;Mm11G027108;Mm13G031104;Mm13G031429;Mm14G032227;Mm18G039412;Mm18G039652;MmUnG041854;MmUnG043963
GO:0006835	dicarboxylic acid transport	4	45	0.36311	0.878976	Mm08G020616;Mm08G020619;Mm14G032114;Mm16G035128
GO:0006351	transcription, DNA-templated	169	2433	0.363812	0.878976	Mm01G000612;Mm01G001138;Mm01G001153;Mm01G001346;Mm01G001432;Mm01G001499;Mm01G001674;Mm01G001740;Mm01G001829;Mm01G001854;Mm01G001862;Mm01G001890;Mm01G002105;Mm01G002930;Mm01G003183;Mm01G003438;Mm01G003546;Mm01G003592;Mm02G004262;Mm02G004568;Mm02G005335;Mm02G005361;Mm02G005742;Mm03G006451;Mm03G006612;Mm03G006667;Mm03G006808;Mm03G006866;Mm03G006971;Mm03G007145;Mm03G008251;Mm03G008617;Mm04G008930;Mm0…
GO:0018022	peptidyl-lysine methylation	8	100	0.365113	0.878976	Mm01G001432;Mm04G008930;Mm07G018726;Mm11G025949;Mm12G028424;Mm16G036396;Mm18G039051;Mm18G039057
GO:0006839	mitochondrial transport	9	114	0.365933	0.878976	Mm01G001589;Mm02G004082;Mm02G004133;Mm13G029855;Mm13G031168;Mm14G032114;Mm16G035128;Mm16G036580;Mm17G036778
GO:0048366	leaf development	39	542	0.367448	0.878976	Mm01G001346;Mm01G001740;Mm01G003438;Mm03G006945;Mm03G007220;Mm03G008617;Mm04G009134;Mm04G009135;Mm04G009542;Mm05G011543;Mm05G013158;Mm05G013358;Mm06G014089;Mm06G015343;Mm07G016725;Mm07G016854;Mm07G017309;Mm07G017654;Mm07G017682;Mm07G018237;Mm07G019118;Mm09G022819;Mm10G023637;Mm10G024785;Mm11G025348;Mm12G028226;Mm12G028492;Mm13G031020;Mm13G031504;Mm14G032821;Mm14G032968;Mm16G036446;Mm17G037497;Mm1…
GO:0032273	positive regulation of protein polymerization	3	32	0.369489	0.878976	Mm01G001499;Mm01G002008;Mm19G041005
GO:0046854	phosphatidylinositol phosphorylation	3	32	0.369489	0.878976	Mm01G001879;Mm02G006073;Mm07G018924
GO:0072583	clathrin-mediated endocytosis	3	32	0.369489	0.878976	Mm06G013826;Mm07G018924;Mm08G020734
GO:0030243	cellulose metabolic process	5	59	0.369502	0.878976	Mm04G009158;Mm07G017201;Mm11G027133;Mm12G028249;MmUnG045228
GO:0044237	cellular metabolic process	682	9999	0.369882	0.878976	Mm01G000154;Mm01G000231;Mm01G000274;Mm01G000322;Mm01G000463;Mm01G000612;Mm01G000619;Mm01G000620;Mm01G000986;Mm01G001057;Mm01G001106;Mm01G001138;Mm01G001153;Mm01G001220;Mm01G001318;Mm01G001346;Mm01G001382;Mm01G001431;Mm01G001432;Mm01G001445;Mm01G001463;Mm01G001472;Mm01G001474;Mm01G001484;Mm01G001490;Mm01G001499;Mm01G001589;Mm01G001674;Mm01G001720;Mm01G001726;Mm01G001740;Mm01G001817;Mm01G001818;Mm0…
GO:0006349	regulation of gene expression by genetic imprinting	2	19	0.37164	0.878976	Mm07G018726;Mm14G033327
GO:0006739	NADP metabolic process	2	19	0.37164	0.878976	Mm12G028741;Mm16G036399
GO:0007032	endosome organization	2	19	0.37164	0.878976	Mm12G027798;Mm18G039716
GO:0007283	spermatogenesis	2	19	0.37164	0.878976	Mm01G001432;MmUnG045253
GO:0009934	regulation of meristem structural organization	2	19	0.37164	0.878976	Mm08G020086;Mm16G036446
GO:0015717	triose phosphate transport	2	19	0.37164	0.878976	Mm03G008128;Mm03G008130
GO:0019058	viral life cycle	2	19	0.37164	0.878976	Mm09G022080;Mm11G026491
GO:0032875	regulation of DNA endoreduplication	2	19	0.37164	0.878976	Mm06G015932;Mm16G036446
GO:0035436	triose phosphate transmembrane transport	2	19	0.37164	0.878976	Mm03G008128;Mm03G008130
GO:0042136	neurotransmitter biosynthetic process	2	19	0.37164	0.878976	Mm11G026955;Mm14G031738
GO:0043171	peptide catabolic process	2	19	0.37164	0.878976	Mm13G031139;Mm17G037718
GO:0051084	'de novo' posttranslational protein folding	2	19	0.37164	0.878976	Mm12G029054;Mm12G029060
GO:0051972	regulation of telomerase activity	2	19	0.37164	0.878976	Mm02G005361;Mm04G009716
GO:0071514	genetic imprinting	2	19	0.37164	0.878976	Mm07G018726;Mm14G033327
GO:0012501	programmed cell death	21	285	0.374714	0.878976	Mm01G000612;Mm01G002378;Mm02G004262;Mm02G004662;Mm02G004928;Mm04G009657;Mm04G009951;Mm07G016721;Mm11G025987;Mm11G027133;Mm12G029054;Mm12G029060;Mm13G030562;Mm14G032085;Mm14G032251;Mm15G034182;Mm16G036446;Mm17G037061;Mm18G039154;MmUnG041876;MmUnG043129
GO:0048831	regulation of shoot system development	27	371	0.375168	0.878976	Mm01G001890;Mm01G003438;Mm02G006288;Mm03G006945;Mm03G007145;Mm03G008617;Mm04G009308;Mm06G014089;Mm08G019755;Mm08G021082;Mm08G021088;Mm09G022819;Mm11G026542;Mm11G027108;Mm13G031020;Mm13G031504;Mm14G032227;Mm14G032821;Mm14G032968;Mm14G032996;Mm16G036446;Mm17G037509;Mm18G039484;MmUnG042583;MmUnG044386;MmUnG045156;MmUnG046280
GO:0010638	positive regulation of organelle organization	10	129	0.375415	0.878976	Mm01G001499;Mm01G002008;Mm02G003859;Mm02G004262;Mm04G009716;Mm04G010691;Mm11G025949;Mm11G026586;Mm19G041005;MmUnG044681
GO:2000242	negative regulation of reproductive process	9	115	0.375707	0.878976	Mm04G009764;Mm07G016671;Mm07G018237;Mm08G019755;Mm11G026542;Mm18G039716;MmUnG042784;MmUnG044145;MmUnG046280
GO:1901616	organic hydroxy compound catabolic process	4	46	0.378818	0.878976	Mm05G012861;Mm05G012959;MmUnG045871;MmUnG045872
GO:0015931	nucleobase-containing compound transport	13	172	0.380983	0.878976	Mm01G001589;Mm02G004974;Mm02G005067;Mm03G006808;Mm04G010398;Mm05G013588;Mm05G013602;Mm07G017368;Mm08G019755;Mm10G024448;Mm13G030975;Mm18G039510;Mm19G041280
GO:0009895	negative regulation of catabolic process	5	60	0.383219	0.878976	Mm02G003859;Mm08G019755;Mm11G026586;Mm19G040510;MmUnG045466
GO:0031330	negative regulation of cellular catabolic process	5	60	0.383219	0.878976	Mm02G003859;Mm08G019755;Mm11G026586;Mm19G040510;MmUnG045466
GO:0045732	positive regulation of protein catabolic process	5	60	0.383219	0.878976	Mm05G013150;Mm06G016310;Mm12G028860;Mm13G031139;MmUnG042812
GO:0017144	drug metabolic process	32	445	0.385905	0.878976	Mm01G002619;Mm01G002625;Mm01G002627;Mm02G003796;Mm02G004928;Mm04G009452;Mm04G009816;Mm04G010064;Mm06G013914;Mm06G015351;Mm07G017006;Mm07G018703;Mm08G019669;Mm08G019835;Mm08G020143;Mm10G024791;Mm10G025034;Mm11G025987;Mm11G026955;Mm12G029280;Mm13G031139;Mm14G032476;Mm16G035156;Mm16G035587;Mm17G037778;Mm17G038062;Mm18G039163;Mm18G039412;Mm18G039413;Mm19G040452;MmUnG045097;MmUnG045874
GO:0032386	regulation of intracellular transport	7	88	0.386035	0.878976	Mm01G001369;Mm06G015832;Mm06G015873;Mm06G016042;Mm06G016080;Mm16G036446;MmUnG041576
GO:0000303	response to superoxide	1	7	0.387714	0.878976	Mm08G020826
GO:0000393	spliceosomal conformational changes to generate catalytic conformation	1	7	0.387714	0.878976	Mm06G014643
GO:0001756	somitogenesis	1	7	0.387714	0.878976	Mm02G003859
GO:0003228	atrial cardiac muscle tissue development	1	7	0.387714	0.878976	Mm02G003859
GO:0005987	sucrose catabolic process	1	7	0.387714	0.878976	Mm05G013579
GO:0006047	UDP-N-acetylglucosamine metabolic process	1	7	0.387714	0.878976	Mm01G001431
GO:0006065	UDP-glucuronate biosynthetic process	1	7	0.387714	0.878976	Mm01G002627
GO:0006085	acetyl-CoA biosynthetic process	1	7	0.387714	0.878976	Mm03G006888
GO:0006097	glyoxylate cycle	1	7	0.387714	0.878976	Mm06G015351
GO:0006102	isocitrate metabolic process	1	7	0.387714	0.878976	Mm04G009816
GO:0006968	cellular defense response	1	7	0.387714	0.878976	Mm07G017201
GO:0007079	mitotic chromosome movement towards spindle pole	1	7	0.387714	0.878976	Mm08G021065
GO:0007269	neurotransmitter secretion	1	7	0.387714	0.878976	Mm03G007357
GO:0008535	respiratory chain complex IV assembly	1	7	0.387714	0.878976	Mm12G028676
GO:0009147	pyrimidine nucleoside triphosphate metabolic process	1	7	0.387714	0.878976	Mm01G002717
GO:0009157	deoxyribonucleoside monophosphate biosynthetic process	1	7	0.387714	0.878976	Mm07G016630
GO:0009264	deoxyribonucleotide catabolic process	1	7	0.387714	0.878976	Mm19G039901
GO:0010069	zygote asymmetric cytokinesis in embryo sac	1	7	0.387714	0.878976	Mm03G006776
GO:0010070	zygote asymmetric cell division	1	7	0.387714	0.878976	Mm03G006776
GO:0010117	photoprotection	1	7	0.387714	0.878976	Mm04G009242
GO:0010271	regulation of chlorophyll catabolic process	1	7	0.387714	0.878976	Mm09G022819
GO:0010364	regulation of ethylene biosynthetic process	1	7	0.387714	0.878976	Mm02G004662
GO:0010561	negative regulation of glycoprotein biosynthetic process	1	7	0.387714	0.878976	Mm04G009716
GO:0010726	positive regulation of hydrogen peroxide metabolic process	1	7	0.387714	0.878976	Mm12G028944
GO:0016358	dendrite development	1	7	0.387714	0.878976	Mm19G040682
GO:0019430	removal of superoxide radicals	1	7	0.387714	0.878976	Mm08G020826
GO:0031155	regulation of fruiting body development	1	7	0.387714	0.878976	Mm18G039716
GO:0031156	regulation of sorocarp development	1	7	0.387714	0.878976	Mm18G039716
GO:0031335	regulation of sulfur amino acid metabolic process	1	7	0.387714	0.878976	Mm02G004662
GO:0031540	regulation of anthocyanin biosynthetic process	1	7	0.387714	0.878976	Mm17G036706
GO:0032607	interferon-alpha production	1	7	0.387714	0.878976	Mm11G026586
GO:0032647	regulation of interferon-alpha production	1	7	0.387714	0.878976	Mm11G026586
GO:0032727	positive regulation of interferon-alpha production	1	7	0.387714	0.878976	Mm11G026586
GO:0032876	negative regulation of DNA endoreduplication	1	7	0.387714	0.878976	Mm06G015932
GO:0032973	amino acid export	1	7	0.387714	0.878976	Mm15G034473
GO:0033617	mitochondrial respiratory chain complex IV assembly	1	7	0.387714	0.878976	Mm12G028676
GO:0034756	regulation of iron ion transport	1	7	0.387714	0.878976	Mm09G022819
GO:0036377	arbuscular mycorrhizal association	1	7	0.387714	0.878976	Mm03G007237
GO:0042149	cellular response to glucose starvation	1	7	0.387714	0.878976	Mm04G009951
GO:0042173	regulation of sporulation resulting in formation of a cellular spore	1	7	0.387714	0.878976	Mm18G039716
GO:0042307	positive regulation of protein import into nucleus	1	7	0.387714	0.878976	Mm01G001369
GO:0043954	cellular component maintenance	1	7	0.387714	0.878976	Mm14G032085
GO:0045663	positive regulation of myoblast differentiation	1	7	0.387714	0.878976	Mm02G003859
GO:0045844	positive regulation of striated muscle tissue development	1	7	0.387714	0.878976	Mm02G003859
GO:0046337	phosphatidylethanolamine metabolic process	1	7	0.387714	0.878976	Mm02G004281
GO:0046386	deoxyribose phosphate catabolic process	1	7	0.387714	0.878976	Mm19G039901
GO:0046900	tetrahydrofolylpolyglutamate metabolic process	1	7	0.387714	0.878976	MmUnG044342
GO:0048636	positive regulation of muscle organ development	1	7	0.387714	0.878976	Mm02G003859
GO:0048643	positive regulation of skeletal muscle tissue development	1	7	0.387714	0.878976	Mm02G003859
GO:0048738	cardiac muscle tissue development	1	7	0.387714	0.878976	Mm02G003859
GO:0050715	positive regulation of cytokine secretion	1	7	0.387714	0.878976	Mm11G026586
GO:0050867	positive regulation of cell activation	1	7	0.387714	0.878976	Mm16G036446
GO:0051305	chromosome movement towards spindle pole	1	7	0.387714	0.878976	Mm08G021065
GO:0051365	cellular response to potassium ion starvation	1	7	0.387714	0.878976	Mm02G005335
GO:0060026	convergent extension	1	7	0.387714	0.878976	Mm05G012770
GO:0060027	convergent extension involved in gastrulation	1	7	0.387714	0.878976	Mm05G012770
GO:0060049	regulation of protein glycosylation	1	7	0.387714	0.878976	Mm04G009716
GO:0060297	regulation of sarcomere organization	1	7	0.387714	0.878976	Mm02G003859
GO:0060298	positive regulation of sarcomere organization	1	7	0.387714	0.878976	Mm02G003859
GO:0071323	cellular response to chitin	1	7	0.387714	0.878976	MmUnG043500
GO:0071450	cellular response to oxygen radical	1	7	0.387714	0.878976	Mm08G020826
GO:0071451	cellular response to superoxide	1	7	0.387714	0.878976	Mm08G020826
GO:0071629	cytoplasm-associated proteasomal ubiquitin-dependent protein catabolic process	1	7	0.387714	0.878976	Mm05G012370
GO:0072641	type I interferon secretion	1	7	0.387714	0.878976	Mm11G026586
GO:0072642	interferon-alpha secretion	1	7	0.387714	0.878976	Mm11G026586
GO:0075260	regulation of spore-bearing organ development	1	7	0.387714	0.878976	Mm18G039716
GO:0080183	response to photooxidative stress	1	7	0.387714	0.878976	Mm17G038062
GO:0085030	mutualism	1	7	0.387714	0.878976	Mm03G007237
GO:0086001	cardiac muscle cell action potential	1	7	0.387714	0.878976	Mm06G015873
GO:0086012	membrane depolarization during cardiac muscle cell action potential	1	7	0.387714	0.878976	Mm06G015873
GO:0090342	regulation of cell aging	1	7	0.387714	0.878976	Mm17G038062
GO:0097034	mitochondrial respiratory chain complex IV biogenesis	1	7	0.387714	0.878976	Mm12G028676
GO:0098532	histone H3-K27 trimethylation	1	7	0.387714	0.878976	Mm01G001432
GO:0098901	regulation of cardiac muscle cell action potential	1	7	0.387714	0.878976	Mm06G015873
GO:0099531	presynaptic process involved in synaptic transmission	1	7	0.387714	0.878976	Mm03G007357
GO:1900367	positive regulation of defense response to insect	1	7	0.387714	0.878976	Mm05G011543
GO:1900908	regulation of olefin metabolic process	1	7	0.387714	0.878976	Mm02G004662
GO:1900911	regulation of olefin biosynthetic process	1	7	0.387714	0.878976	Mm02G004662
GO:1901404	regulation of tetrapyrrole catabolic process	1	7	0.387714	0.878976	Mm09G022819
GO:1901863	positive regulation of muscle tissue development	1	7	0.387714	0.878976	Mm02G003859
GO:1902739	regulation of interferon-alpha secretion	1	7	0.387714	0.878976	Mm11G026586
GO:1902741	positive regulation of interferon-alpha secretion	1	7	0.387714	0.878976	Mm11G026586
GO:1902811	positive regulation of skeletal muscle fiber differentiation	1	7	0.387714	0.878976	Mm02G003859
GO:1903019	negative regulation of glycoprotein metabolic process	1	7	0.387714	0.878976	Mm04G009716
GO:2000105	positive regulation of DNA-dependent DNA replication	1	7	0.387714	0.878976	Mm16G036446
GO:2000766	negative regulation of cytoplasmic translation	1	7	0.387714	0.878976	Mm02G003859
GO:2001016	positive regulation of skeletal muscle cell differentiation	1	7	0.387714	0.878976	Mm02G003859
GO:2001259	positive regulation of cation channel activity	1	7	0.387714	0.878976	Mm06G015873
GO:0006829	zinc II ion transport	3	33	0.388292	0.878976	Mm03G007170;Mm04G009439;Mm07G018241
GO:0051788	response to misfolded protein	3	33	0.388292	0.878976	Mm05G012370;Mm12G029054;Mm12G029060
GO:2000060	positive regulation of protein ubiquitination involved in ubiquitin-dependent protein catabolic process	3	33	0.388292	0.878976	Mm05G013150;Mm06G016310;Mm12G028860
GO:0033692	cellular polysaccharide biosynthetic process	13	173	0.389002	0.879451	Mm01G002619;Mm01G002625;Mm01G003560;Mm04G009158;Mm04G009839;Mm08G020226;Mm10G024791;Mm11G027133;Mm12G028249;Mm14G032476;Mm15G034693;Mm16G035156;MmUnG045228
GO:0048573	photoperiodism, flowering	13	173	0.389002	0.879451	Mm03G007145;Mm04G009764;Mm06G015778;Mm07G016671;Mm07G018726;Mm11G026542;Mm11G027133;Mm11G027583;Mm11G027600;Mm16G035189;MmUnG042784;MmUnG044145;MmUnG045156
GO:0006355	regulation of transcription, DNA-templated	162	2343	0.392504	0.886306	Mm01G000612;Mm01G001138;Mm01G001153;Mm01G001346;Mm01G001432;Mm01G001499;Mm01G001674;Mm01G001740;Mm01G001829;Mm01G001854;Mm01G001862;Mm01G001890;Mm01G002105;Mm01G002930;Mm01G003183;Mm01G003438;Mm01G003546;Mm01G003592;Mm02G004262;Mm02G004568;Mm02G005335;Mm02G005361;Mm02G005742;Mm03G006451;Mm03G006612;Mm03G006667;Mm03G006808;Mm03G006866;Mm03G006971;Mm03G007145;Mm03G008251;Mm03G008617;Mm04G008930;Mm0…
GO:0042886	amide transport	46	649	0.39254	0.886306	Mm01G001369;Mm01G001899;Mm02G004082;Mm02G004133;Mm02G004262;Mm02G004959;Mm02G004960;Mm02G005075;Mm02G005077;Mm02G005411;Mm03G006808;Mm03G008461;Mm04G009631;Mm04G010171;Mm04G010398;Mm04G010704;Mm05G012458;Mm05G012489;Mm05G012648;Mm05G012781;Mm05G013457;Mm06G015322;Mm06G016166;Mm07G016854;Mm07G017368;Mm07G019154;Mm08G019755;Mm08G020086;Mm08G021065;Mm10G024805;Mm10G024923;Mm11G026586;Mm12G027798;Mm1…
GO:0048316	seed development	61	867	0.392884	0.886514	Mm01G000832;Mm01G000913;Mm01G001431;Mm01G002717;Mm01G003383;Mm02G004697;Mm03G006776;Mm03G007377;Mm04G009284;Mm04G009542;Mm04G009673;Mm04G009726;Mm04G009736;Mm04G010003;Mm05G012370;Mm05G012777;Mm05G013564;Mm06G014089;Mm06G014911;Mm06G015343;Mm06G015844;Mm07G016361;Mm07G016470;Mm07G016725;Mm07G016752;Mm07G016854;Mm07G017309;Mm07G017416;Mm07G018237;Mm07G018700;Mm07G018726;Mm07G018949;Mm08G020616;Mm0…
GO:0044270	cellular nitrogen compound catabolic process	23	317	0.394899	0.890489	Mm01G001817;Mm02G003796;Mm02G003859;Mm02G004928;Mm04G009452;Mm04G009542;Mm04G010064;Mm08G020743;Mm08G021642;Mm09G022819;Mm11G025968;Mm11G025987;Mm11G026586;Mm11G027349;Mm14G031781;Mm14G032085;Mm14G033093;Mm17G037115;Mm17G037536;Mm19G039901;Mm19G040510;Mm19G041329;MmUnG045466
GO:0007265	Ras protein signal transduction	2	20	0.396307	0.891944	Mm08G021065;Mm11G026595
GO:0030435	sporulation resulting in formation of a cellular spore	2	20	0.396307	0.891944	Mm05G013624;Mm18G039716
GO:0045839	negative regulation of mitotic nuclear division	2	20	0.396307	0.891944	Mm02G004533;Mm08G019755
GO:0031123	RNA 3'-end processing	7	89	0.397324	0.893383	Mm01G002243;Mm01G002629;Mm06G015719;Mm08G020941;Mm14G032085;Mm14G032473;MmUnG042541
GO:1902410	mitotic cytokinetic process	6	75	0.397598	0.893383	Mm04G009672;Mm07G017226;Mm13G030514;Mm13G030523;MmUnG041576;MmUnG043085
GO:0009615	response to virus	11	146	0.401159	0.893383	Mm04G008930;Mm06G015712;Mm08G019998;Mm08G019999;Mm08G020004;Mm11G026586;Mm16G035587;Mm17G036972;Mm17G037536;Mm18G039253;MmUnG043360
GO:0032436	positive regulation of proteasomal ubiquitin-dependent protein catabolic process	3	34	0.406955	0.893383	Mm05G013150;Mm06G016310;Mm12G028860
GO:0032881	regulation of polysaccharide metabolic process	3	34	0.406955	0.893383	Mm12G028264;MmUnG042483;MmUnG045228
GO:0050000	chromosome localization	3	34	0.406955	0.893383	Mm04G010461;Mm04G010487;Mm08G021065
GO:0051782	negative regulation of cell division	3	34	0.406955	0.893383	Mm01G001837;Mm02G004533;Mm08G019755
GO:0055062	phosphate ion homeostasis	3	34	0.406955	0.893383	Mm11G025874;Mm16G035587;Mm19G039996
GO:0072506	trivalent inorganic anion homeostasis	3	34	0.406955	0.893383	Mm11G025874;Mm16G035587;Mm19G039996
GO:0009816	defense response to bacterium, incompatible interaction	7	90	0.408611	0.893383	Mm04G008930;Mm04G009134;Mm04G009135;Mm12G028226;Mm17G036675;Mm19G041016;MmUnG043129
GO:0010218	response to far red light	6	76	0.409911	0.893383	Mm03G006667;Mm04G009242;Mm11G027583;Mm11G027600;Mm16G035189;Mm17G037248
GO:0007155	cell adhesion	4	48	0.410091	0.893383	Mm08G019835;Mm08G020743;Mm11G027349;MmUnG041576
GO:0022610	biological adhesion	4	48	0.410091	0.893383	Mm08G019835;Mm08G020743;Mm11G027349;MmUnG041576
GO:0045596	negative regulation of cell differentiation	4	48	0.410091	0.893383	Mm01G003113;Mm16G035214;Mm18G039716;MmUnG041859
GO:0051495	positive regulation of cytoskeleton organization	4	48	0.410091	0.893383	Mm01G001499;Mm01G002008;Mm02G003859;Mm19G041005
GO:0009723	response to ethylene	24	334	0.410129	0.893383	Mm01G001138;Mm01G001837;Mm02G004568;Mm06G014068;Mm06G014089;Mm06G015343;Mm07G017048;Mm07G019394;Mm11G025375;Mm11G026760;Mm11G026761;Mm11G026762;Mm13G031020;Mm16G035732;Mm17G037483;Mm17G037509;Mm18G039652;Mm19G040227;Mm19G041282;MmUnG044386;MmUnG044925;MmUnG045156;MmUnG045977;MmUnG046263
GO:0051301	cell division	32	451	0.416129	0.893383	Mm01G001829;Mm01G001837;Mm01G002930;Mm01G003113;Mm02G004262;Mm02G004533;Mm03G006563;Mm03G006776;Mm04G009158;Mm04G009672;Mm04G009726;Mm04G009736;Mm04G009909;Mm04G011232;Mm07G016361;Mm07G016752;Mm07G017048;Mm07G017226;Mm07G017416;Mm08G019755;Mm09G022226;Mm11G027133;Mm12G028249;Mm12G028307;Mm13G030514;Mm13G030523;Mm14G033426;Mm18G039398;MmUnG041576;MmUnG041859;MmUnG043085;MmUnG046010
GO:0005996	monosaccharide metabolic process	8	105	0.417445	0.893383	Mm01G002431;Mm01G003560;Mm07G018949;Mm07G019154;Mm08G020226;Mm11G025987;Mm15G033600;Mm15G033611
GO:0042546	cell wall biogenesis	19	263	0.417749	0.893383	Mm01G002619;Mm01G002625;Mm02G005321;Mm04G009158;Mm04G009726;Mm04G009736;Mm07G016361;Mm07G016752;Mm07G018949;Mm09G022576;Mm10G024791;Mm11G026758;Mm11G027133;Mm12G028249;Mm13G030878;Mm14G032476;Mm15G034693;Mm16G035156;MmUnG045228
GO:0046700	heterocycle catabolic process	23	321	0.418792	0.893383	Mm01G001817;Mm02G003796;Mm02G003859;Mm02G004928;Mm04G009452;Mm04G009542;Mm04G010064;Mm08G020743;Mm08G021642;Mm09G022819;Mm11G025968;Mm11G025987;Mm11G026586;Mm11G027349;Mm14G031781;Mm14G032085;Mm14G033093;Mm17G037115;Mm17G037536;Mm19G039901;Mm19G040510;Mm19G041329;MmUnG045466
GO:0007264	small GTPase mediated signal transduction	2	21	0.420515	0.893383	Mm08G021065;Mm11G026595
GO:0007368	determination of left/right symmetry	2	21	0.420515	0.893383	Mm02G003859;Mm06G014582
GO:0007507	heart development	2	21	0.420515	0.893383	Mm02G003859;Mm06G015873
GO:0010215	cellulose microfibril organization	2	21	0.420515	0.893383	Mm11G026758;Mm11G027133
GO:0015800	acidic amino acid transport	2	21	0.420515	0.893383	Mm08G020616;Mm08G020619
GO:0015813	L-glutamate transport	2	21	0.420515	0.893383	Mm08G020616;Mm08G020619
GO:0032878	regulation of establishment or maintenance of cell polarity	2	21	0.420515	0.893383	Mm04G010461;Mm04G010487
GO:0043266	regulation of potassium ion transport	2	21	0.420515	0.893383	Mm01G001946;Mm06G015873
GO:0045931	positive regulation of mitotic cell cycle	2	21	0.420515	0.893383	Mm02G004262;Mm04G009950
GO:0048639	positive regulation of developmental growth	2	21	0.420515	0.893383	Mm11G026595;Mm16G036446
GO:0044403	symbiosis, encompassing mutualism through parasitism	10	134	0.421725	0.893383	Mm02G005848;Mm02G005856;Mm03G007237;Mm04G008930;Mm06G015812;Mm09G022080;Mm11G026491;Mm14G033223;MmUnG043085;MmUnG046009
GO:0098660	inorganic ion transmembrane transport	39	554	0.421997	0.893383	Mm01G000443;Mm02G004048;Mm02G004055;Mm02G006026;Mm03G007170;Mm04G008790;Mm04G008795;Mm04G009094;Mm04G009349;Mm04G009439;Mm04G009657;Mm06G015832;Mm06G015873;Mm07G016854;Mm07G017838;Mm07G018241;Mm07G019324;Mm10G025057;Mm11G027554;Mm12G029137;Mm12G029210;Mm12G029486;Mm12G029507;Mm14G032114;Mm14G032807;Mm14G033555;Mm15G034182;Mm16G035128;Mm16G036446;Mm17G037647;Mm18G038806;Mm19G040611;Mm19G041159;MmU…
GO:0009561	megagametogenesis	6	77	0.4222	0.893383	Mm03G006667;Mm07G018931;Mm07G019037;Mm11G027001;Mm12G027798;Mm14G031637
GO:0032350	regulation of hormone metabolic process	6	77	0.4222	0.893383	Mm02G004021;Mm02G004240;Mm02G004662;Mm08G020698;Mm08G021642;Mm10G024617
GO:0033993	response to lipid	81	1168	0.423881	0.893383	Mm01G000619;Mm01G000620;Mm01G002102;Mm01G002373;Mm01G003560;Mm02G004048;Mm02G004055;Mm02G004240;Mm02G004568;Mm02G005335;Mm02G005361;Mm02G005742;Mm02G005975;Mm02G006288;Mm03G006667;Mm03G006808;Mm03G006866;Mm03G007044;Mm03G007145;Mm04G009816;Mm04G010003;Mm04G011105;Mm05G012615;Mm05G012861;Mm05G013150;Mm05G013158;Mm05G013564;Mm06G014068;Mm06G014134;Mm06G014139;Mm06G015832;Mm06G015945;Mm06G016155;Mm0…
GO:0000723	telomere maintenance	5	63	0.424225	0.893383	Mm04G009716;Mm11G026586;Mm16G036539;MmUnG043011;MmUnG044681
GO:0019751	polyol metabolic process	5	63	0.424225	0.893383	Mm05G012861;Mm08G019835;Mm16G035587;Mm18G039412;Mm18G039413
GO:0032200	telomere organization	5	63	0.424225	0.893383	Mm04G009716;Mm11G026586;Mm16G036539;MmUnG043011;MmUnG044681
GO:0034765	regulation of ion transmembrane transport	5	63	0.424225	0.893383	Mm03G007350;Mm06G015832;Mm06G015873;Mm12G028676;Mm16G036446
GO:0090662	ATP hydrolysis coupled transmembrane transport	5	63	0.424225	0.893383	Mm02G006026;Mm15G034182;Mm19G040611;Mm19G041159;MmUnG041876
GO:0071103	DNA conformation change	9	120	0.424768	0.893383	Mm01G000612;Mm01G001432;Mm01G001818;Mm02G003883;Mm05G012054;Mm06G015411;Mm14G032085;Mm16G036539;MmUnG045529
GO:0051128	regulation of cellular component organization	43	613	0.425206	0.893383	Mm01G000612;Mm01G001499;Mm01G001829;Mm01G002008;Mm02G003859;Mm02G004262;Mm02G004533;Mm02G004697;Mm03G006563;Mm04G009631;Mm04G009716;Mm04G010461;Mm04G010487;Mm04G010691;Mm05G012914;Mm05G013158;Mm07G016854;Mm07G017240;Mm07G018468;Mm08G019755;Mm08G020035;Mm09G022499;Mm11G025949;Mm11G026586;Mm11G026595;Mm11G026760;Mm11G026761;Mm11G026762;Mm11G027133;Mm13G031139;Mm14G031635;Mm14G032085;Mm16G036446;Mm1…
GO:0007417	central nervous system development	3	35	0.425443	0.893383	Mm01G001432;Mm06G015832;Mm07G017418
GO:0016925	protein sumoylation	3	35	0.425443	0.893383	Mm07G016590;Mm08G019755;Mm16G036446
GO:0048826	cotyledon morphogenesis	3	35	0.425443	0.893383	Mm07G017309;Mm11G025348;Mm18G039625
GO:0035295	tube development	4	49	0.425611	0.893383	Mm01G003113;Mm02G003859;Mm19G040682;MmUnG041859
GO:0051960	regulation of nervous system development	4	49	0.425611	0.893383	Mm01G003113;Mm11G026595;Mm19G040682;MmUnG041859
GO:0009611	response to wounding	30	424	0.426732	0.893383	Mm01G000832;Mm01G000913;Mm01G002102;Mm02G005361;Mm04G009053;Mm04G009622;Mm04G011232;Mm06G014139;Mm06G015841;Mm06G016155;Mm06G016225;Mm07G017309;Mm08G020159;Mm08G020743;Mm08G021655;Mm10G025034;Mm11G026999;Mm11G027349;Mm12G028264;Mm13G031104;Mm14G032580;Mm14G033426;Mm15G034997;Mm16G036446;Mm17G038082;Mm18G039346;MmUnG042483;MmUnG042978;MmUnG043085;MmUnG045156
GO:0008104	protein localization	54	774	0.427057	0.893383	Mm01G001369;Mm01G001899;Mm01G003113;Mm02G004082;Mm02G004133;Mm02G004262;Mm02G004959;Mm02G004960;Mm02G005075;Mm02G005077;Mm02G005411;Mm03G006808;Mm04G009631;Mm04G010171;Mm04G010398;Mm04G010461;Mm04G010487;Mm04G010704;Mm05G012458;Mm05G012489;Mm05G012648;Mm05G013457;Mm06G015322;Mm06G015873;Mm07G016854;Mm07G017368;Mm07G019154;Mm08G019755;Mm08G020086;Mm08G021065;Mm10G024805;Mm10G024923;Mm11G026586;Mm1…
GO:0010033	response to organic substance	202	2946	0.427395	0.893383	Mm01G000619;Mm01G000620;Mm01G001138;Mm01G001318;Mm01G001369;Mm01G001463;Mm01G001472;Mm01G001674;Mm01G001837;Mm01G001854;Mm01G002102;Mm01G002373;Mm01G002378;Mm01G003281;Mm01G003438;Mm01G003560;Mm02G003938;Mm02G004048;Mm02G004055;Mm02G004082;Mm02G004133;Mm02G004240;Mm02G004262;Mm02G004473;Mm02G004568;Mm02G004697;Mm02G004928;Mm02G005022;Mm02G005335;Mm02G005361;Mm02G005742;Mm02G005975;Mm02G006288;Mm0…
GO:0098657	import into cell	11	149	0.427585	0.893383	Mm04G009349;Mm06G013826;Mm06G015832;Mm07G018924;Mm08G020616;Mm08G020619;Mm08G020734;Mm10G023637;MmUnG041576;MmUnG044966;MmUnG045880
GO:0000304	response to singlet oxygen	1	8	0.429164	0.893383	Mm13G030562
GO:0003205	cardiac chamber development	1	8	0.429164	0.893383	Mm06G015873
GO:0003230	cardiac atrium development	1	8	0.429164	0.893383	Mm06G015873
GO:0003279	cardiac septum development	1	8	0.429164	0.893383	Mm06G015873
GO:0003283	atrial septum development	1	8	0.429164	0.893383	Mm06G015873
GO:0006013	mannose metabolic process	1	8	0.429164	0.893383	Mm07G019154
GO:0006105	succinate metabolic process	1	8	0.429164	0.893383	Mm08G019835
GO:0006145	purine nucleobase catabolic process	1	8	0.429164	0.893383	Mm14G033093
GO:0006531	aspartate metabolic process	1	8	0.429164	0.893383	Mm16G036079
GO:0006552	leucine catabolic process	1	8	0.429164	0.893383	Mm19G041329
GO:0007517	muscle organ development	1	8	0.429164	0.893383	Mm02G003859
GO:0007519	skeletal muscle tissue development	1	8	0.429164	0.893383	Mm02G003859
GO:0009720	detection of hormone stimulus	1	8	0.429164	0.893383	Mm07G019394
GO:0009726	detection of endogenous stimulus	1	8	0.429164	0.893383	Mm07G019394
GO:0009865	pollen tube adhesion	1	8	0.429164	0.893383	Mm08G019835
GO:0009877	nodulation	1	8	0.429164	0.893383	Mm03G007237
GO:0010289	homogalacturonan biosynthetic process	1	8	0.429164	0.893383	Mm16G035156
GO:0010555	response to mannitol	1	8	0.429164	0.893383	Mm07G018700
GO:0010981	regulation of cell wall macromolecule metabolic process	1	8	0.429164	0.893383	MmUnG045228
GO:0014706	striated muscle tissue development	1	8	0.429164	0.893383	Mm02G003859
GO:0015750	pentose transport	1	8	0.429164	0.893383	Mm12G029137
GO:0015783	GDP-fucose transport	1	8	0.429164	0.893383	Mm13G030975
GO:0016202	regulation of striated muscle tissue development	1	8	0.429164	0.893383	Mm02G003859
GO:0018175	protein nucleotidylation	1	8	0.429164	0.893383	Mm01G001854
GO:0018177	protein uridylylation	1	8	0.429164	0.893383	Mm01G001854
GO:0019048	modulation by virus of host morphology or physiology	1	8	0.429164	0.893383	Mm04G008930
GO:0019605	butyrate metabolic process	1	8	0.429164	0.893383	Mm06G015351
GO:0030518	intracellular steroid hormone receptor signaling pathway	1	8	0.429164	0.893383	Mm05G013150
GO:0031086	nuclear-transcribed mRNA catabolic process, deadenylation-independent decay	1	8	0.429164	0.893383	Mm04G009542
GO:0031087	deadenylation-independent decapping of nuclear-transcribed mRNA	1	8	0.429164	0.893383	Mm04G009542
GO:0031145	anaphase-promoting complex-dependent proteasomal ubiquitin-dependent protein catabolic process	1	8	0.429164	0.893383	Mm03G006563
GO:0031534	minus-end directed microtubule sliding	1	8	0.429164	0.893383	MmUnG043852
GO:0032957	inositol trisphosphate metabolic process	1	8	0.429164	0.893383	Mm05G012861
GO:0033356	UDP-L-arabinose metabolic process	1	8	0.429164	0.893383	Mm02G005321
GO:0035384	thioester biosynthetic process	1	8	0.429164	0.893383	Mm03G006888
GO:0035914	skeletal muscle cell differentiation	1	8	0.429164	0.893383	Mm02G003859
GO:0042769	DNA damage response, detection of DNA damage	1	8	0.429164	0.893383	Mm04G009716
GO:0043330	response to exogenous dsRNA	1	8	0.429164	0.893383	Mm11G026586
GO:0043937	regulation of sporulation	1	8	0.429164	0.893383	Mm18G039716
GO:0045661	regulation of myoblast differentiation	1	8	0.429164	0.893383	Mm02G003859
GO:0046470	phosphatidylcholine metabolic process	1	8	0.429164	0.893383	Mm14G031738
GO:0046487	glyoxylate metabolic process	1	8	0.429164	0.893383	Mm06G015351
GO:0048634	regulation of muscle organ development	1	8	0.429164	0.893383	Mm02G003859
GO:0048641	regulation of skeletal muscle tissue development	1	8	0.429164	0.893383	Mm02G003859
GO:0048701	embryonic cranial skeleton morphogenesis	1	8	0.429164	0.893383	Mm02G003859
GO:0048702	embryonic neurocranium morphogenesis	1	8	0.429164	0.893383	Mm02G003859
GO:0048704	embryonic skeletal system morphogenesis	1	8	0.429164	0.893383	Mm02G003859
GO:0048706	embryonic skeletal system development	1	8	0.429164	0.893383	Mm02G003859
GO:0050707	regulation of cytokine secretion	1	8	0.429164	0.893383	Mm11G026586
GO:0051012	microtubule sliding	1	8	0.429164	0.893383	MmUnG043852
GO:0051899	membrane depolarization	1	8	0.429164	0.893383	Mm06G015873
GO:0052324	plant-type cell wall cellulose biosynthetic process	1	8	0.429164	0.893383	MmUnG045228
GO:0060538	skeletal muscle organ development	1	8	0.429164	0.893383	Mm02G003859
GO:0061053	somite development	1	8	0.429164	0.893383	Mm02G003859
GO:0061615	glycolytic process through fructose-6-phosphate	1	8	0.429164	0.893383	Mm04G009452
GO:0071486	cellular response to high light intensity	1	8	0.429164	0.893383	Mm04G009242
GO:0071491	cellular response to red light	1	8	0.429164	0.893383	Mm04G009242
GO:0071616	acyl-CoA biosynthetic process	1	8	0.429164	0.893383	Mm03G006888
GO:0072501	cellular divalent inorganic anion homeostasis	1	8	0.429164	0.893383	Mm16G035587
GO:0080051	cutin transport	1	8	0.429164	0.893383	Mm07G017309
GO:0080148	negative regulation of response to water deprivation	1	8	0.429164	0.893383	Mm06G014487
GO:0086010	membrane depolarization during action potential	1	8	0.429164	0.893383	Mm06G015873
GO:0090057	root radial pattern formation	1	8	0.429164	0.893383	Mm06G015719
GO:0090293	nitrogen catabolite regulation of transcription	1	8	0.429164	0.893383	Mm01G001854
GO:0098528	skeletal muscle fiber differentiation	1	8	0.429164	0.893383	Mm02G003859
GO:0098740	multi organism cell adhesion	1	8	0.429164	0.893383	Mm08G019835
GO:0099504	synaptic vesicle cycle	1	8	0.429164	0.893383	Mm03G007357
GO:1901381	positive regulation of potassium ion transmembrane transport	1	8	0.429164	0.893383	Mm06G015873
GO:1901861	regulation of muscle tissue development	1	8	0.429164	0.893383	Mm02G003859
GO:1902809	regulation of skeletal muscle fiber differentiation	1	8	0.429164	0.893383	Mm02G003859
GO:1903664	regulation of asexual reproduction	1	8	0.429164	0.893383	Mm18G039716
GO:1904888	cranial skeletal system development	1	8	0.429164	0.893383	Mm02G003859
GO:2000095	regulation of Wnt signaling pathway, planar cell polarity pathway	1	8	0.429164	0.893383	Mm05G012770
GO:2001009	regulation of plant-type cell wall cellulose biosynthetic process	1	8	0.429164	0.893383	MmUnG045228
GO:2001014	regulation of skeletal muscle cell differentiation	1	8	0.429164	0.893383	Mm02G003859
GO:0009648	photoperiodism	13	178	0.429262	0.893383	Mm03G007145;Mm04G009764;Mm06G015778;Mm07G016671;Mm07G018726;Mm11G026542;Mm11G027133;Mm11G027583;Mm11G027600;Mm16G035189;MmUnG042784;MmUnG044145;MmUnG045156
GO:0032774	RNA biosynthetic process	171	2493	0.434135	0.902991	Mm01G000612;Mm01G001138;Mm01G001153;Mm01G001346;Mm01G001432;Mm01G001499;Mm01G001674;Mm01G001740;Mm01G001829;Mm01G001854;Mm01G001862;Mm01G001890;Mm01G002105;Mm01G002930;Mm01G003183;Mm01G003438;Mm01G003546;Mm01G003592;Mm02G004262;Mm02G004568;Mm02G005335;Mm02G005361;Mm02G005742;Mm03G006451;Mm03G006612;Mm03G006667;Mm03G006808;Mm03G006866;Mm03G006971;Mm03G007145;Mm03G008251;Mm03G008617;Mm04G008930;Mm0…
GO:0042254	ribosome biogenesis	23	324	0.436782	0.907957	Mm01G001382;Mm01G001899;Mm01G002629;Mm02G005022;Mm02G006265;Mm03G006735;Mm03G008528;Mm09G022324;Mm11G026575;Mm11G027001;Mm12G028150;Mm14G032473;Mm14G033329;Mm15G034886;Mm16G035507;Mm18G039408;Mm19G041397;Mm19G041401;MmUnG042541;MmUnG042994;MmUnG043328;MmUnG045042;MmUnG045396
GO:0043487	regulation of RNA stability	5	64	0.437793	0.908447	Mm02G003859;Mm11G026586;Mm17G037536;Mm19G040510;MmUnG045466
GO:0044003	modification by symbiont of host morphology or physiology	5	64	0.437793	0.908447	Mm02G005848;Mm02G005856;Mm04G008930;Mm06G015812;MmUnG043085
GO:0051273	beta-glucan metabolic process	5	64	0.437793	0.908447	Mm04G009158;Mm07G017201;Mm11G027133;Mm12G028249;MmUnG045228
GO:0034976	response to endoplasmic reticulum stress	8	107	0.438355	0.909075	Mm01G003162;Mm05G013588;Mm05G013602;Mm08G020086;Mm12G028797;Mm12G028803;Mm12G029054;Mm12G029060
GO:0009624	response to nematode	10	136	0.440254	0.912475	Mm01G000443;Mm03G007170;Mm06G015841;Mm13G030511;Mm13G030519;Mm14G031878;Mm18G039051;Mm18G039057;Mm19G040966;MmUnG041876
GO:0045597	positive regulation of cell differentiation	4	50	0.441025	0.913533	Mm02G003859;Mm11G026595;Mm12G028424;Mm18G039716
GO:0000079	regulation of cyclin-dependent protein serine/threonine kinase activity	3	36	0.443726	0.91582	Mm06G016083;Mm17G037550;MmUnG041650
GO:0031647	regulation of protein stability	3	36	0.443726	0.91582	Mm01G001899;Mm06G015873;MmUnG044681
GO:0042631	cellular response to water deprivation	3	36	0.443726	0.91582	Mm01G003560;Mm08G020226;MmUnG045156
GO:1904029	regulation of cyclin-dependent protein kinase activity	3	36	0.443726	0.91582	Mm06G016083;Mm17G037550;MmUnG041650
GO:0007409	axonogenesis	2	22	0.444216	0.91582	Mm01G000612;Mm16G036093
GO:0010160	formation of organ boundary	2	22	0.444216	0.91582	Mm01G003113;MmUnG041859
GO:0010508	positive regulation of autophagy	2	22	0.444216	0.91582	Mm06G016121;Mm13G031123
GO:0072659	protein localization to plasma membrane	2	22	0.444216	0.91582	Mm06G015873;Mm12G027798
GO:0051649	establishment of localization in cell	75	1087	0.446761	0.920527	Mm01G001369;Mm01G001589;Mm01G001899;Mm02G004082;Mm02G004133;Mm02G004262;Mm02G004959;Mm02G004960;Mm02G005075;Mm02G005077;Mm02G005411;Mm02G005961;Mm02G006073;Mm03G006808;Mm03G007350;Mm03G007357;Mm04G009631;Mm04G009672;Mm04G010171;Mm04G010398;Mm04G010461;Mm04G010487;Mm04G010691;Mm04G010704;Mm05G012347;Mm05G012458;Mm05G012489;Mm05G012648;Mm05G013457;Mm06G015322;Mm06G015832;Mm06G015873;Mm06G016042;Mm0…
GO:0002252	immune effector process	10	137	0.4495	0.921192	Mm01G003438;Mm04G008930;Mm11G025375;Mm13G031504;Mm14G032821;Mm14G032968;Mm16G035587;Mm17G037536;MmUnG042583;MmUnG046263
GO:0034762	regulation of transmembrane transport	5	65	0.451288	0.921192	Mm03G007350;Mm06G015832;Mm06G015873;Mm12G028676;Mm16G036446
GO:0010675	regulation of cellular carbohydrate metabolic process	4	51	0.456314	0.921192	Mm04G009716;Mm12G028264;MmUnG042483;MmUnG045228
GO:0030244	cellulose biosynthetic process	4	51	0.456314	0.921192	Mm04G009158;Mm11G027133;Mm12G028249;MmUnG045228
GO:0043488	regulation of mRNA stability	4	51	0.456314	0.921192	Mm02G003859;Mm17G037536;Mm19G040510;MmUnG045466
GO:0045184	establishment of protein localization	44	635	0.457403	0.921192	Mm01G001369;Mm01G001899;Mm02G004082;Mm02G004133;Mm02G004262;Mm02G004959;Mm02G004960;Mm02G005075;Mm02G005077;Mm02G005411;Mm03G006808;Mm04G009631;Mm04G010171;Mm04G010398;Mm04G010704;Mm05G012458;Mm05G012489;Mm05G012648;Mm05G013457;Mm06G015322;Mm07G016854;Mm07G017368;Mm07G019154;Mm08G019755;Mm08G020086;Mm08G021065;Mm10G024805;Mm10G024923;Mm11G026586;Mm12G027798;Mm12G029046;Mm13G029855;Mm13G031117;Mm1…
GO:0040011	locomotion	10	138	0.458727	0.921192	Mm01G000612;Mm05G012648;Mm06G015832;Mm07G016470;Mm08G019835;Mm14G031738;Mm16G036093;Mm18G039245;MmUnG043393;MmUnG045834
GO:0009790	embryo development	45	650	0.458836	0.921192	Mm01G000832;Mm01G000913;Mm01G001431;Mm01G002717;Mm01G003383;Mm02G003859;Mm02G004697;Mm03G006776;Mm04G009284;Mm04G009542;Mm04G009673;Mm04G009726;Mm04G009736;Mm04G010003;Mm05G012770;Mm05G013564;Mm06G014911;Mm07G016361;Mm07G016470;Mm07G016725;Mm07G016752;Mm07G016854;Mm07G017309;Mm07G017416;Mm07G018949;Mm08G020035;Mm11G025348;Mm11G027001;Mm12G027690;Mm12G028492;Mm13G030039;Mm14G032996;Mm14G033327;Mm1…
GO:0022604	regulation of cell morphogenesis	8	109	0.459167	0.921192	Mm02G004262;Mm04G010461;Mm04G010487;Mm07G016854;Mm11G026595;Mm19G040682;MmUnG043393;MmUnG045834
GO:0007154	cell communication	167	2445	0.459672	0.921192	Mm01G000612;Mm01G000986;Mm01G001106;Mm01G001153;Mm01G001220;Mm01G001432;Mm01G001445;Mm01G001463;Mm01G001472;Mm01G001474;Mm01G001490;Mm01G001854;Mm01G001901;Mm01G001959;Mm01G001987;Mm01G002030;Mm01G002378;Mm01G003113;Mm01G003313;Mm01G003438;Mm01G003560;Mm02G003796;Mm02G003938;Mm02G004048;Mm02G004055;Mm02G004240;Mm02G004262;Mm02G004533;Mm02G004662;Mm02G004697;Mm02G004928;Mm02G005335;Mm02G005361;Mm0…
GO:0022613	ribonucleoprotein complex biogenesis	28	401	0.459741	0.921192	Mm01G001382;Mm01G001899;Mm01G002629;Mm02G005022;Mm02G006265;Mm03G006735;Mm03G008528;Mm06G014643;Mm07G017401;Mm09G022324;Mm10G024805;Mm11G026575;Mm11G027001;Mm12G028150;Mm14G032473;Mm14G033329;Mm15G034886;Mm16G035507;Mm18G039408;Mm19G041397;Mm19G041401;MmUnG041917;MmUnG042541;MmUnG042994;MmUnG043328;MmUnG043444;MmUnG045042;MmUnG045396
GO:0009725	response to hormone	156	2283	0.459786	0.921192	Mm01G000619;Mm01G000620;Mm01G001138;Mm01G001463;Mm01G001472;Mm01G001674;Mm01G001837;Mm01G002102;Mm01G002373;Mm01G002378;Mm01G003438;Mm01G003560;Mm02G003938;Mm02G004048;Mm02G004055;Mm02G004082;Mm02G004133;Mm02G004240;Mm02G004262;Mm02G004473;Mm02G004568;Mm02G005335;Mm02G005361;Mm02G005742;Mm02G005975;Mm02G006288;Mm03G006667;Mm03G006776;Mm03G006808;Mm03G006866;Mm03G007044;Mm03G007145;Mm03G007413;Mm0…
GO:0008360	regulation of cell shape	3	37	0.461776	0.921192	Mm02G004262;Mm04G010461;Mm04G010487
GO:0046173	polyol biosynthetic process	3	37	0.461776	0.921192	Mm16G035587;Mm18G039412;Mm18G039413
GO:0046834	lipid phosphorylation	3	37	0.461776	0.921192	Mm01G001879;Mm02G006073;Mm07G018924
GO:0071462	cellular response to water stimulus	3	37	0.461776	0.921192	Mm01G003560;Mm08G020226;MmUnG045156
GO:1903312	negative regulation of mRNA metabolic process	3	37	0.461776	0.921192	Mm02G003859;Mm19G040510;MmUnG045466
GO:2000112	regulation of cellular macromolecule biosynthetic process	175	2564	0.462296	0.921192	Mm01G000612;Mm01G001138;Mm01G001153;Mm01G001346;Mm01G001432;Mm01G001499;Mm01G001674;Mm01G001740;Mm01G001829;Mm01G001854;Mm01G001862;Mm01G001890;Mm01G002105;Mm01G002930;Mm01G003183;Mm01G003438;Mm01G003546;Mm01G003592;Mm02G003859;Mm02G003938;Mm02G004262;Mm02G004568;Mm02G005335;Mm02G005361;Mm02G005742;Mm03G006451;Mm03G006612;Mm03G006667;Mm03G006808;Mm03G006866;Mm03G006971;Mm03G007145;Mm03G008251;Mm0…
GO:0048585	negative regulation of response to stimulus	33	475	0.463544	0.921192	Mm02G004039;Mm02G004262;Mm02G006288;Mm03G006866;Mm04G009764;Mm05G012770;Mm06G014487;Mm06G014582;Mm06G016107;Mm07G016671;Mm07G016721;Mm07G017048;Mm07G018237;Mm11G025375;Mm11G026542;Mm11G026595;Mm11G026760;Mm11G026761;Mm11G026762;Mm11G027133;Mm11G027473;Mm11G027477;Mm14G032227;Mm14G032357;Mm17G037061;Mm17G038062;Mm18G039051;Mm18G039057;Mm18G039716;Mm19G041016;MmUnG042784;MmUnG044145;MmUnG046263
GO:0008033	tRNA processing	9	124	0.463878	0.921192	Mm01G000154;Mm03G006776;Mm03G007393;Mm04G009981;Mm05G011418;Mm06G014806;Mm07G018633;Mm14G031702;Mm14G033329
GO:0031122	cytoplasmic microtubule organization	5	66	0.464694	0.921192	Mm07G017226;Mm08G021065;Mm11G027133;MmUnG043085;MmUnG045922
GO:0048858	cell projection morphogenesis	5	66	0.464694	0.921192	Mm01G000612;Mm05G012770;Mm11G026595;Mm16G036093;Mm19G040682
GO:0048580	regulation of post-embryonic development	40	578	0.464925	0.921192	Mm01G001890;Mm01G003113;Mm03G006945;Mm03G007145;Mm03G007377;Mm04G009242;Mm04G009308;Mm04G009764;Mm06G014089;Mm06G015343;Mm07G016671;Mm07G017048;Mm07G018237;Mm07G018726;Mm07G019394;Mm08G019755;Mm08G021082;Mm08G021088;Mm09G022819;Mm09G023354;Mm11G026542;Mm11G026864;Mm11G027133;Mm11G027583;Mm11G027600;Mm13G031020;Mm13G031374;Mm14G032996;Mm16G035189;Mm16G035430;Mm16G036446;Mm17G037509;MmUnG041583;MmU…
GO:0009894	regulation of catabolic process	17	241	0.465776	0.921192	Mm02G003859;Mm02G004697;Mm05G012648;Mm05G013150;Mm06G016121;Mm06G016310;Mm08G019755;Mm09G022819;Mm11G026586;Mm12G028860;Mm13G031123;Mm13G031139;Mm14G032085;Mm17G037536;Mm19G040510;MmUnG042812;MmUnG045466
GO:0001736	establishment of planar polarity	2	23	0.467365	0.921192	Mm05G012770;MmUnG041576
GO:0001738	morphogenesis of a polarized epithelium	2	23	0.467365	0.921192	Mm05G012770;MmUnG041576
GO:0006414	translational elongation	2	23	0.467365	0.921192	Mm03G006555;Mm12G028753
GO:0007009	plasma membrane organization	2	23	0.467365	0.921192	Mm06G015873;Mm12G027798
GO:0007091	metaphase/anaphase transition of mitotic cell cycle	2	23	0.467365	0.921192	Mm03G006563;Mm08G019755
GO:0009220	pyrimidine ribonucleotide biosynthetic process	2	23	0.467365	0.921192	Mm04G009546;Mm15G033964
GO:0010496	intercellular transport	2	23	0.467365	0.921192	Mm06G015719;Mm07G016854
GO:0010965	regulation of mitotic sister chromatid separation	2	23	0.467365	0.921192	Mm03G006563;Mm08G019755
GO:0030071	regulation of mitotic metaphase/anaphase transition	2	23	0.467365	0.921192	Mm03G006563;Mm08G019755
GO:0032886	regulation of microtubule-based process	2	23	0.467365	0.921192	Mm03G007411;Mm11G027133
GO:0044784	metaphase/anaphase transition of cell cycle	2	23	0.467365	0.921192	Mm03G006563;Mm08G019755
GO:0048863	stem cell differentiation	2	23	0.467365	0.921192	Mm02G003859;Mm12G028424
GO:0061158	3'-UTR-mediated mRNA destabilization	2	23	0.467365	0.921192	Mm02G003859;Mm17G037536
GO:1901658	glycosyl compound catabolic process	2	23	0.467365	0.921192	Mm07G017418;Mm10G025034
GO:1902099	regulation of metaphase/anaphase transition of cell cycle	2	23	0.467365	0.921192	Mm03G006563;Mm08G019755
GO:2000034	regulation of seed maturation	2	23	0.467365	0.921192	Mm07G018237;Mm14G032996
GO:2001233	regulation of apoptotic signaling pathway	2	23	0.467365	0.921192	Mm02G004262;Mm07G016721
GO:0000105	histidine biosynthetic process	1	9	0.467811	0.921192	Mm01G000322
GO:0000305	response to oxygen radical	1	9	0.467811	0.921192	Mm08G020826
GO:0006547	histidine metabolic process	1	9	0.467811	0.921192	Mm01G000322
GO:0006809	nitric oxide biosynthetic process	1	9	0.467811	0.921192	Mm11G026955
GO:0006878	cellular copper ion homeostasis	1	9	0.467811	0.921192	Mm12G028676
GO:0009663	plasmodesma organization	1	9	0.467811	0.921192	Mm07G016854
GO:0010304	PSII associated light-harvesting complex II catabolic process	1	9	0.467811	0.921192	Mm11G025968
GO:0010394	homogalacturonan metabolic process	1	9	0.467811	0.921192	Mm16G035156
GO:0010569	regulation of double-strand break repair via homologous recombination	1	9	0.467811	0.921192	Mm02G005268
GO:0010601	positive regulation of auxin biosynthetic process	1	9	0.467811	0.921192	Mm08G020698
GO:0019856	pyrimidine nucleobase biosynthetic process	1	9	0.467811	0.921192	Mm07G016579
GO:0030002	cellular anion homeostasis	1	9	0.467811	0.921192	Mm16G035587
GO:0030320	cellular monovalent inorganic anion homeostasis	1	9	0.467811	0.921192	Mm16G035587
GO:0031929	TOR signaling	1	9	0.467811	0.921192	Mm02G004697
GO:0032950	regulation of beta-glucan metabolic process	1	9	0.467811	0.921192	MmUnG045228
GO:0032951	regulation of beta-glucan biosynthetic process	1	9	0.467811	0.921192	MmUnG045228
GO:0033353	S-adenosylmethionine cycle	1	9	0.467811	0.921192	Mm17G038062
GO:0042063	gliogenesis	1	9	0.467811	0.921192	Mm01G000612
GO:0042135	neurotransmitter catabolic process	1	9	0.467811	0.921192	Mm08G019835
GO:0042727	flavin-containing compound biosynthetic process	1	9	0.467811	0.921192	Mm01G002957
GO:0043570	maintenance of DNA repeat elements	1	9	0.467811	0.921192	Mm01G000612
GO:0046398	UDP-glucuronate metabolic process	1	9	0.467811	0.921192	Mm01G002627
GO:0046459	short-chain fatty acid metabolic process	1	9	0.467811	0.921192	Mm06G015351
GO:0046473	phosphatidic acid metabolic process	1	9	0.467811	0.921192	MmUnG043129
GO:0048281	inflorescence morphogenesis	1	9	0.467811	0.921192	Mm19G040046
GO:0048705	skeletal system morphogenesis	1	9	0.467811	0.921192	Mm02G003859
GO:0050663	cytokine secretion	1	9	0.467811	0.921192	Mm11G026586
GO:0052803	imidazole-containing compound metabolic process	1	9	0.467811	0.921192	Mm01G000322
GO:0060537	muscle tissue development	1	9	0.467811	0.921192	Mm02G003859
GO:0070919	production of siRNA involved in chromatin silencing by small RNA	1	9	0.467811	0.921192	Mm04G008930
GO:0080117	secondary growth	1	9	0.467811	0.921192	Mm09G022819
GO:0080142	regulation of salicylic acid biosynthetic process	1	9	0.467811	0.921192	Mm10G024617
GO:0080190	lateral growth	1	9	0.467811	0.921192	Mm09G022819
GO:0090669	telomerase RNA stabilization	1	9	0.467811	0.921192	Mm11G026586
GO:1901259	chloroplast rRNA processing	1	9	0.467811	0.921192	Mm03G008528
GO:1902117	positive regulation of organelle assembly	1	9	0.467811	0.921192	Mm02G003859
GO:1904591	positive regulation of protein import	1	9	0.467811	0.921192	Mm01G001369
GO:2001006	regulation of cellulose biosynthetic process	1	9	0.467811	0.921192	MmUnG045228
GO:0007276	gamete generation	8	110	0.46952	0.924038	Mm01G001432;Mm01G003113;Mm05G012777;Mm05G013489;Mm06G015932;MmUnG041859;MmUnG043085;MmUnG045253
GO:0009639	response to red or far red light	19	271	0.470648	0.92571	Mm03G006505;Mm03G006667;Mm03G007145;Mm03G008251;Mm04G009242;Mm05G012959;Mm07G018228;Mm08G020935;Mm09G022792;Mm11G027583;Mm11G027600;Mm14G032996;Mm16G035189;Mm16G035420;Mm16G036458;Mm17G037248;Mm19G040046;MmUnG042784;MmUnG045686
GO:0032506	cytokinetic process	6	81	0.470896	0.92571	Mm04G009672;Mm07G017226;Mm13G030514;Mm13G030523;MmUnG041576;MmUnG043085
GO:0033044	regulation of chromosome organization	11	154	0.471481	0.925827	Mm01G000612;Mm03G006563;Mm04G009716;Mm05G013158;Mm07G017240;Mm08G019755;Mm11G025949;Mm11G026586;Mm18G039051;Mm18G039057;MmUnG044681
GO:0010154	fruit development	62	903	0.471484	0.925827	Mm01G000832;Mm01G000913;Mm01G001431;Mm01G002717;Mm01G003383;Mm02G004697;Mm03G006776;Mm03G007377;Mm04G009284;Mm04G009542;Mm04G009673;Mm04G009726;Mm04G009736;Mm04G010003;Mm05G012370;Mm05G012777;Mm05G013564;Mm06G014089;Mm06G014911;Mm06G015343;Mm06G015844;Mm07G016361;Mm07G016470;Mm07G016725;Mm07G016752;Mm07G016854;Mm07G017309;Mm07G017416;Mm07G018237;Mm07G018700;Mm07G018726;Mm07G018949;Mm08G019835;Mm0…
GO:0097659	nucleic acid-templated transcription	169	2480	0.472706	0.927709	Mm01G000612;Mm01G001138;Mm01G001153;Mm01G001346;Mm01G001432;Mm01G001499;Mm01G001674;Mm01G001740;Mm01G001829;Mm01G001854;Mm01G001862;Mm01G001890;Mm01G002105;Mm01G002930;Mm01G003183;Mm01G003438;Mm01G003546;Mm01G003592;Mm02G004262;Mm02G004568;Mm02G005335;Mm02G005361;Mm02G005742;Mm03G006451;Mm03G006612;Mm03G006667;Mm03G006808;Mm03G006866;Mm03G006971;Mm03G007145;Mm03G008251;Mm03G008617;Mm04G008930;Mm0…
GO:0071407	cellular response to organic cyclic compound	21	301	0.474933	0.931559	Mm01G002378;Mm01G003438;Mm02G003938;Mm02G004240;Mm04G008930;Mm05G013150;Mm05G013358;Mm06G015832;Mm10G024525;Mm12G028264;Mm13G031504;Mm14G032251;Mm14G032821;Mm14G032968;Mm15G034997;Mm17G038062;Mm19G040227;MmUnG042483;MmUnG042583;MmUnG043085;MmUnG045977
GO:1902600	hydrogen ion transmembrane transport	10	140	0.477104	0.935295	Mm04G008795;Mm04G009094;Mm04G009349;Mm07G019324;Mm12G029137;Mm14G032114;Mm18G038806;Mm19G041159;MmUnG044154;MmUnG044966
GO:0009559	embryo sac central cell differentiation	3	38	0.479566	0.938548	Mm03G006667;Mm11G027001;Mm14G031637
GO:0022904	respiratory electron transport chain	3	38	0.479566	0.938548	Mm04G009951;Mm08G019669;Mm19G040452
GO:0031060	regulation of histone methylation	3	38	0.479566	0.938548	Mm11G025949;Mm18G039051;Mm18G039057
GO:0070727	cellular macromolecule localization	45	655	0.480331	0.939522	Mm01G001369;Mm01G001899;Mm02G004082;Mm02G004133;Mm02G004262;Mm02G004959;Mm02G004960;Mm02G005075;Mm02G005077;Mm02G005411;Mm03G006808;Mm04G009631;Mm04G010171;Mm04G010398;Mm04G010461;Mm04G010487;Mm04G010704;Mm05G012458;Mm05G012489;Mm05G013358;Mm05G013457;Mm06G015322;Mm06G015873;Mm07G017368;Mm07G019154;Mm08G019755;Mm08G021065;Mm10G024805;Mm10G024923;Mm11G027133;Mm12G027798;Mm12G029046;Mm13G029855;Mm1…
GO:0015031	protein transport	42	611	0.481093	0.940489	Mm01G001369;Mm01G001899;Mm02G004082;Mm02G004133;Mm02G004262;Mm02G004959;Mm02G004960;Mm02G005075;Mm02G005077;Mm02G005411;Mm03G006808;Mm04G009631;Mm04G010171;Mm04G010398;Mm04G010704;Mm05G012458;Mm05G012489;Mm05G012648;Mm05G013457;Mm06G015322;Mm07G016854;Mm07G017368;Mm07G019154;Mm08G019755;Mm08G020086;Mm08G021065;Mm10G024805;Mm10G024923;Mm11G026586;Mm12G027798;Mm12G029046;Mm13G029855;Mm13G031117;Mm1…
GO:0051193	regulation of cofactor metabolic process	6	82	0.482905	0.943505	Mm04G009242;Mm09G022819;Mm09G023354;Mm12G028944;Mm13G030562;Mm18G039484
GO:2000241	regulation of reproductive process	33	479	0.483554	0.944248	Mm01G001829;Mm01G001890;Mm03G007145;Mm03G007377;Mm04G009308;Mm04G009764;Mm06G014089;Mm06G015343;Mm07G016671;Mm07G018237;Mm07G018726;Mm08G019755;Mm08G021082;Mm08G021088;Mm09G022819;Mm09G023354;Mm11G026542;Mm11G027133;Mm11G027583;Mm11G027600;Mm13G031020;Mm14G032996;Mm16G035189;Mm16G036446;Mm17G037509;Mm18G039716;MmUnG042784;MmUnG043393;MmUnG044145;MmUnG044386;MmUnG045156;MmUnG045834;MmUnG046280
GO:0018958	phenol-containing compound metabolic process	4	53	0.486446	0.946477	Mm10G024617;Mm10G025034;MmUnG045871;MmUnG045872
GO:0043622	cortical microtubule organization	4	53	0.486446	0.946477	Mm07G017226;Mm11G027133;MmUnG043085;MmUnG045922
GO:0051274	beta-glucan biosynthetic process	4	53	0.486446	0.946477	Mm04G009158;Mm11G027133;Mm12G028249;MmUnG045228
GO:0090056	regulation of chlorophyll metabolic process	4	53	0.486446	0.946477	Mm04G009242;Mm09G022819;Mm09G023354;Mm18G039484
GO:0016197	endosomal transport	7	97	0.486823	0.946477	Mm02G006073;Mm04G009672;Mm08G020035;Mm10G024923;Mm14G032401;Mm17G036760;MmUnG041576
GO:0045165	cell fate commitment	7	97	0.486823	0.946477	Mm01G001432;Mm01G003113;Mm04G010691;Mm14G033426;Mm16G036446;Mm17G036706;MmUnG041859
GO:0072329	monocarboxylic acid catabolic process	7	97	0.486823	0.946477	Mm01G001589;Mm05G012959;Mm06G015322;Mm08G019835;Mm12G028060;MmUnG045871;MmUnG045872
GO:0070588	calcium ion transmembrane transport	11	156	0.488891	0.946477	Mm02G004048;Mm02G004055;Mm02G006026;Mm06G015832;Mm06G015873;Mm07G017838;Mm15G034182;Mm16G036446;Mm19G040611;MmUnG041697;MmUnG041876
GO:0006560	proline metabolic process	2	24	0.48993	0.946477	Mm03G008617;Mm14G033462
GO:0007164	establishment of tissue polarity	2	24	0.48993	0.946477	Mm05G012770;MmUnG041576
GO:0007420	brain development	2	24	0.48993	0.946477	Mm01G001432;Mm06G015832
GO:0009218	pyrimidine ribonucleotide metabolic process	2	24	0.48993	0.946477	Mm04G009546;Mm15G033964
GO:0010204	defense response signaling pathway, resistance gene-independent	2	24	0.48993	0.946477	Mm12G029054;Mm12G029060
GO:0010363	regulation of plant-type hypersensitive response	2	24	0.48993	0.946477	Mm17G037061;MmUnG043129
GO:0010588	cotyledon vascular tissue pattern formation	2	24	0.48993	0.946477	Mm07G017309;Mm18G039625
GO:0030488	tRNA methylation	2	24	0.48993	0.946477	Mm05G011418;Mm14G031702
GO:0048439	flower morphogenesis	2	24	0.48993	0.946477	Mm05G013158;Mm18G039484
GO:0051306	mitotic sister chromatid separation	2	24	0.48993	0.946477	Mm03G006563;Mm08G019755
GO:0051784	negative regulation of nuclear division	2	24	0.48993	0.946477	Mm02G004533;Mm08G019755
GO:0006575	cellular modified amino acid metabolic process	8	112	0.490087	0.946477	Mm01G002176;Mm16G035357;Mm17G037778;Mm17G038062;MmUnG042945;MmUnG044342;MmUnG044674;MmUnG045874
GO:0000160	phosphorelay signal transduction system	12	171	0.491269	0.948237	Mm06G014089;Mm06G014476;Mm06G015343;Mm06G015497;Mm07G017048;Mm09G023354;Mm11G025375;Mm13G031020;Mm17G037509;MmUnG044386;MmUnG044925;MmUnG046263
GO:0009259	ribonucleotide metabolic process	17	245	0.493632	0.948579	Mm01G001463;Mm01G001472;Mm02G004473;Mm02G004928;Mm03G006888;Mm04G009452;Mm04G009546;Mm06G015411;Mm08G019669;Mm09G023196;Mm11G025987;Mm12G028604;Mm13G030794;Mm15G033964;Mm19G040452;MmUnG045529;MmUnG045936
GO:0002520	immune system development	3	39	0.497074	0.948579	Mm01G003113;Mm06G015844;MmUnG041859
GO:0055083	monovalent inorganic anion homeostasis	3	39	0.497074	0.948579	Mm11G025874;Mm16G035587;Mm19G039996
GO:0060284	regulation of cell development	7	98	0.497784	0.948579	Mm01G003113;Mm02G003859;Mm11G026595;Mm19G040682;MmUnG041859;MmUnG043393;MmUnG045834
GO:0009260	ribonucleotide biosynthetic process	12	172	0.49954	0.948579	Mm01G001463;Mm01G001472;Mm02G004473;Mm02G004928;Mm03G006888;Mm04G009452;Mm04G009546;Mm06G015411;Mm11G025987;Mm13G030794;Mm15G033964;MmUnG045529
GO:0046390	ribose phosphate biosynthetic process	12	172	0.49954	0.948579	Mm01G001463;Mm01G001472;Mm02G004473;Mm02G004928;Mm03G006888;Mm04G009452;Mm04G009546;Mm06G015411;Mm11G025987;Mm13G030794;Mm15G033964;MmUnG045529
GO:0031175	neuron projection development	4	54	0.501256	0.948579	Mm01G000612;Mm11G026595;Mm16G036093;Mm19G040682
GO:0009735	response to cytokinin	22	320	0.501299	0.948579	Mm02G004082;Mm02G004133;Mm02G004240;Mm06G014089;Mm06G014476;Mm06G015343;Mm06G015497;Mm07G017654;Mm07G017682;Mm07G019394;Mm09G022819;Mm09G023354;Mm11G026075;Mm11G026206;Mm11G026864;Mm13G031020;Mm14G032085;Mm16G035156;Mm16G036580;Mm17G037509;Mm18G039484;MmUnG044386
GO:0000715	nucleotide-excision repair, DNA damage recognition	1	10	0.503844	0.948579	MmUnG043011
GO:0001503	ossification	1	10	0.503844	0.948579	Mm11G026586
GO:0006971	hypotonic response	1	10	0.503844	0.948579	MmUnG043085
GO:0009162	deoxyribonucleoside monophosphate metabolic process	1	10	0.503844	0.948579	Mm07G016630
GO:0009263	deoxyribonucleotide biosynthetic process	1	10	0.503844	0.948579	Mm01G002717
GO:0009652	thigmotropism	1	10	0.503844	0.948579	Mm16G035214
GO:0010259	multicellular organism aging	1	10	0.503844	0.948579	Mm13G031139
GO:0010421	hydrogen peroxide-mediated programmed cell death	1	10	0.503844	0.948579	Mm18G039154
GO:0010831	positive regulation of myotube differentiation	1	10	0.503844	0.948579	Mm02G003859
GO:0015692	lead ion transport	1	10	0.503844	0.948579	Mm19G041282
GO:0016123	xanthophyll biosynthetic process	1	10	0.503844	0.948579	Mm03G006613
GO:0019287	isopentenyl diphosphate biosynthetic process, mevalonate pathway	1	10	0.503844	0.948579	Mm12G028604
GO:0019320	hexose catabolic process	1	10	0.503844	0.948579	Mm11G025987
GO:0032410	negative regulation of transporter activity	1	10	0.503844	0.948579	Mm03G007350
GO:0032413	negative regulation of ion transmembrane transporter activity	1	10	0.503844	0.948579	Mm03G007350
GO:0034763	negative regulation of transmembrane transport	1	10	0.503844	0.948579	Mm03G007350
GO:0034766	negative regulation of ion transmembrane transport	1	10	0.503844	0.948579	Mm03G007350
GO:0036474	cell death in response to hydrogen peroxide	1	10	0.503844	0.948579	Mm18G039154
GO:0042304	regulation of fatty acid biosynthetic process	1	10	0.503844	0.948579	Mm02G004021
GO:0042306	regulation of protein import into nucleus	1	10	0.503844	0.948579	Mm01G001369
GO:0045292	mRNA cis splicing, via spliceosome	1	10	0.503844	0.948579	MmUnG041917
GO:0045445	myoblast differentiation	1	10	0.503844	0.948579	Mm02G003859
GO:0046439	L-cysteine metabolic process	1	10	0.503844	0.948579	Mm17G038062
GO:0046498	S-adenosylhomocysteine metabolic process	1	10	0.503844	0.948579	Mm17G038062
GO:0046824	positive regulation of nucleocytoplasmic transport	1	10	0.503844	0.948579	Mm01G001369
GO:0048489	synaptic vesicle transport	1	10	0.503844	0.948579	Mm03G007357
GO:0050865	regulation of cell activation	1	10	0.503844	0.948579	Mm16G036446
GO:0051149	positive regulation of muscle cell differentiation	1	10	0.503844	0.948579	Mm02G003859
GO:0051155	positive regulation of striated muscle cell differentiation	1	10	0.503844	0.948579	Mm02G003859
GO:0051785	positive regulation of nuclear division	1	10	0.503844	0.948579	Mm02G004262
GO:0070534	protein K63-linked ubiquitination	1	10	0.503844	0.948579	Mm06G014643
GO:0097479	synaptic vesicle localization	1	10	0.503844	0.948579	Mm03G007357
GO:0097480	establishment of synaptic vesicle localization	1	10	0.503844	0.948579	Mm03G007357
GO:1901016	regulation of potassium ion transmembrane transporter activity	1	10	0.503844	0.948579	Mm06G015873
GO:1902347	response to strigolactone	1	10	0.503844	0.948579	Mm06G014134
GO:2000068	regulation of defense response to insect	1	10	0.503844	0.948579	Mm05G011543
GO:2000779	regulation of double-strand break repair	1	10	0.503844	0.948579	Mm02G005268
GO:0006275	regulation of DNA replication	5	69	0.504265	0.948579	Mm02G005361;Mm04G009716;Mm06G015932;Mm16G036446;MmUnG044681
GO:1900424	regulation of defense response to bacterium	5	69	0.504265	0.948579	Mm02G006288;Mm10G024617;Mm14G032227;Mm19G041016;MmUnG045156
GO:0044419	interspecies interaction between organisms	10	143	0.504414	0.948579	Mm02G005848;Mm02G005856;Mm03G007237;Mm04G008930;Mm06G015812;Mm09G022080;Mm11G026491;Mm14G033223;MmUnG043085;MmUnG046009
GO:0009856	pollination	20	291	0.504846	0.948884	Mm01G002619;Mm01G002625;Mm03G006505;Mm04G010289;Mm07G016470;Mm07G017726;Mm07G018468;Mm07G018703;Mm07G018949;Mm08G019835;Mm11G026760;Mm11G026761;Mm11G026762;Mm11G026998;Mm11G027133;Mm14G031738;Mm14G032476;Mm16G036458;MmUnG043393;MmUnG045834
GO:0033036	macromolecule localization	68	1001	0.505667	0.949918	Mm01G001369;Mm01G001899;Mm01G003113;Mm02G004082;Mm02G004133;Mm02G004262;Mm02G004959;Mm02G004960;Mm02G005075;Mm02G005077;Mm02G005411;Mm03G006808;Mm04G009631;Mm04G010171;Mm04G010398;Mm04G010461;Mm04G010487;Mm04G010704;Mm05G012458;Mm05G012489;Mm05G012648;Mm05G013358;Mm05G013457;Mm06G015322;Mm06G015873;Mm07G016854;Mm07G017309;Mm07G017368;Mm07G019154;Mm08G019412;Mm08G019755;Mm08G019827;Mm08G020086;Mm0…
GO:1903506	regulation of nucleic acid-templated transcription	162	2392	0.509206	0.954073	Mm01G000612;Mm01G001138;Mm01G001153;Mm01G001346;Mm01G001432;Mm01G001499;Mm01G001674;Mm01G001740;Mm01G001829;Mm01G001854;Mm01G001862;Mm01G001890;Mm01G002105;Mm01G002930;Mm01G003183;Mm01G003438;Mm01G003546;Mm01G003592;Mm02G004262;Mm02G004568;Mm02G005335;Mm02G005361;Mm02G005742;Mm03G006451;Mm03G006612;Mm03G006667;Mm03G006808;Mm03G006866;Mm03G006971;Mm03G007145;Mm03G008251;Mm03G008617;Mm04G008930;Mm0…
GO:2001141	regulation of RNA biosynthetic process	162	2392	0.509206	0.954073	Mm01G000612;Mm01G001138;Mm01G001153;Mm01G001346;Mm01G001432;Mm01G001499;Mm01G001674;Mm01G001740;Mm01G001829;Mm01G001854;Mm01G001862;Mm01G001890;Mm01G002105;Mm01G002930;Mm01G003183;Mm01G003438;Mm01G003546;Mm01G003592;Mm02G004262;Mm02G004568;Mm02G005335;Mm02G005361;Mm02G005742;Mm03G006451;Mm03G006612;Mm03G006667;Mm03G006808;Mm03G006866;Mm03G006971;Mm03G007145;Mm03G008251;Mm03G008617;Mm04G008930;Mm0…
GO:0031331	positive regulation of cellular catabolic process	8	114	0.510429	0.954073	Mm02G003859;Mm05G013150;Mm06G016121;Mm06G016310;Mm12G028860;Mm13G031123;Mm14G032085;Mm17G037536
GO:0048509	regulation of meristem development	14	203	0.510653	0.954073	Mm01G002930;Mm06G014089;Mm06G015343;Mm07G017048;Mm08G020086;Mm09G022819;Mm09G023354;Mm13G031020;Mm14G032996;Mm16G036446;Mm17G037509;Mm18G039484;MmUnG044386;MmUnG046010
GO:0006334	nucleosome assembly	2	25	0.511883	0.954073	Mm01G000612;Mm02G003883
GO:0009190	cyclic nucleotide biosynthetic process	2	25	0.511883	0.954073	Mm01G001463;Mm01G001472
GO:0016577	histone demethylation	2	25	0.511883	0.954073	Mm05G013158;Mm16G036396
GO:0030097	hemopoiesis	2	25	0.511883	0.954073	Mm01G003113;MmUnG041859
GO:0030100	regulation of endocytosis	2	25	0.511883	0.954073	Mm07G016854;Mm18G039245
GO:0031338	regulation of vesicle fusion	2	25	0.511883	0.954073	Mm04G009631;Mm08G020035
GO:0052652	cyclic purine nucleotide metabolic process	2	25	0.511883	0.954073	Mm01G001463;Mm01G001472
GO:0060322	head development	2	25	0.511883	0.954073	Mm01G001432;Mm06G015832
GO:0070076	histone lysine demethylation	2	25	0.511883	0.954073	Mm05G013158;Mm16G036396
GO:0097193	intrinsic apoptotic signaling pathway	2	25	0.511883	0.954073	Mm01G000612;Mm04G009951
GO:0009642	response to light intensity	15	218	0.511955	0.954073	Mm04G009242;Mm04G009392;Mm04G009492;Mm06G015712;Mm06G016225;Mm07G017480;Mm07G018726;Mm11G026624;Mm12G028494;Mm13G030422;Mm18G039346;Mm19G040917;MmUnG043360;MmUnG043371;MmUnG045156
GO:0010492	maintenance of shoot apical meristem identity	3	40	0.51428	0.957391	Mm02G004697;Mm05G012219;Mm09G023354
GO:0010506	regulation of autophagy	3	40	0.51428	0.957391	Mm02G004697;Mm06G016121;Mm13G031123
GO:0006664	glycolipid metabolic process	4	55	0.515877	0.959346	Mm04G010918;Mm04G010922;Mm07G017418;Mm11G026364
GO:1903509	liposaccharide metabolic process	4	55	0.515877	0.959346	Mm04G010918;Mm04G010922;Mm07G017418;Mm11G026364
GO:0006972	hyperosmotic response	7	100	0.519477	0.965018	Mm01G002028;Mm03G008617;Mm04G010003;Mm06G016225;Mm14G033462;MmUnG043085;MmUnG043371
GO:0042176	regulation of protein catabolic process	7	100	0.519477	0.965018	Mm05G012648;Mm05G013150;Mm06G016310;Mm08G019755;Mm12G028860;Mm13G031139;MmUnG042812
GO:0070838	divalent metal ion transport	16	234	0.520261	0.965963	Mm02G004048;Mm02G004055;Mm02G006026;Mm03G007170;Mm04G009439;Mm05G012618;Mm06G015832;Mm06G015873;Mm07G017838;Mm07G018241;Mm12G029486;Mm15G034182;Mm16G036446;Mm19G040611;MmUnG041697;MmUnG041876
GO:0048588	developmental cell growth	17	249	0.521212	0.967217	Mm01G002619;Mm01G002625;Mm03G006505;Mm04G010289;Mm05G013153;Mm07G017726;Mm07G018468;Mm08G019835;Mm11G026595;Mm11G026999;Mm14G031738;Mm14G032476;Mm16G036458;Mm17G036912;Mm17G037647;MmUnG043393;MmUnG045834
GO:0072593	reactive oxygen species metabolic process	10	145	0.5224	0.96891	Mm07G019295;Mm08G020143;Mm08G020826;Mm11G026955;Mm12G028944;Mm13G030562;Mm14G033093;Mm17G037550;Mm17G038062;MmUnG041650
GO:0090407	organophosphate biosynthetic process	26	383	0.522956	0.969429	Mm01G001463;Mm01G001472;Mm01G002717;Mm01G002957;Mm02G004281;Mm02G004473;Mm02G004928;Mm03G006888;Mm04G009452;Mm04G009546;Mm06G015411;Mm07G016579;Mm07G016630;Mm11G025987;Mm11G026237;Mm12G028604;Mm12G028741;Mm13G030794;Mm14G031738;Mm15G033964;Mm16G035587;Mm16G036539;Mm18G039412;Mm18G039413;MmUnG043129;MmUnG045529
GO:0048583	regulation of response to stimulus	89	1318	0.5259	0.969656	Mm01G000612;Mm01G001432;Mm01G003113;Mm01G003438;Mm02G003938;Mm02G004039;Mm02G004262;Mm02G005268;Mm02G005354;Mm02G005371;Mm02G005848;Mm02G005856;Mm02G006288;Mm03G006776;Mm03G006866;Mm04G009134;Mm04G009135;Mm04G009308;Mm04G009764;Mm05G011543;Mm05G012648;Mm05G012770;Mm05G013150;Mm05G013358;Mm06G014487;Mm06G014582;Mm06G015812;Mm06G016107;Mm07G016671;Mm07G016721;Mm07G017048;Mm07G018237;Mm07G018726;Mm0…
GO:0060249	anatomical structure homeostasis	5	71	0.529994	0.969656	Mm04G009716;Mm11G026586;Mm16G036539;MmUnG043011;MmUnG044681
GO:0044724	single-organism carbohydrate catabolic process	6	86	0.530002	0.969656	Mm02G004928;Mm04G009452;Mm05G013579;Mm07G018226;Mm11G025987;Mm17G037351
GO:0044706	multi-multicellular organism process	20	295	0.530161	0.969656	Mm01G002619;Mm01G002625;Mm03G006505;Mm04G010289;Mm07G016470;Mm07G017726;Mm07G018468;Mm07G018703;Mm07G018949;Mm08G019835;Mm11G026760;Mm11G026761;Mm11G026762;Mm11G026998;Mm11G027133;Mm14G031738;Mm14G032476;Mm16G036458;MmUnG043393;MmUnG045834
GO:0032434	regulation of proteasomal ubiquitin-dependent protein catabolic process	4	56	0.530296	0.969656	Mm05G013150;Mm06G016310;Mm08G019755;Mm12G028860
GO:2001252	positive regulation of chromosome organization	4	56	0.530296	0.969656	Mm04G009716;Mm11G025949;Mm11G026586;MmUnG044681
GO:0009737	response to abscisic acid	57	845	0.530947	0.969656	Mm01G000619;Mm01G000620;Mm01G002102;Mm01G003560;Mm02G004048;Mm02G004055;Mm02G004568;Mm02G005335;Mm02G005361;Mm02G005742;Mm02G006288;Mm03G006667;Mm03G006808;Mm03G006866;Mm03G007044;Mm03G007145;Mm04G009816;Mm04G010003;Mm04G011105;Mm05G012615;Mm05G012861;Mm05G013564;Mm06G014139;Mm06G015945;Mm06G016155;Mm07G017309;Mm07G017838;Mm07G018237;Mm08G020143;Mm08G020226;Mm08G020784;Mm09G022819;Mm09G023096;Mm1…
GO:0010929	positive regulation of auxin mediated signaling pathway	3	41	0.531167	0.969656	Mm14G032085;Mm19G040227;MmUnG045977
GO:0042787	protein ubiquitination involved in ubiquitin-dependent protein catabolic process	3	41	0.531167	0.969656	Mm05G013150;Mm06G016310;Mm12G028860
GO:0072505	divalent inorganic anion homeostasis	3	41	0.531167	0.969656	Mm11G025874;Mm16G035587;Mm19G039996
GO:2000058	regulation of protein ubiquitination involved in ubiquitin-dependent protein catabolic process	3	41	0.531167	0.969656	Mm05G013150;Mm06G016310;Mm12G028860
GO:0009123	nucleoside monophosphate metabolic process	11	161	0.53178	0.969656	Mm01G002717;Mm02G004473;Mm02G004928;Mm04G009452;Mm04G009546;Mm07G016630;Mm08G019669;Mm11G025987;Mm13G030794;Mm16G036539;Mm19G040452
GO:0006482	protein demethylation	2	26	0.533204	0.969656	Mm05G013158;Mm16G036396
GO:0007029	endoplasmic reticulum organization	2	26	0.533204	0.969656	Mm06G015932;Mm07G019111
GO:0008214	protein dealkylation	2	26	0.533204	0.969656	Mm05G013158;Mm16G036396
GO:0009187	cyclic nucleotide metabolic process	2	26	0.533204	0.969656	Mm01G001463;Mm01G001472
GO:0010720	positive regulation of cell development	2	26	0.533204	0.969656	Mm02G003859;Mm11G026595
GO:0010975	regulation of neuron projection development	2	26	0.533204	0.969656	Mm11G026595;Mm19G040682
GO:0033047	regulation of mitotic sister chromatid segregation	2	26	0.533204	0.969656	Mm03G006563;Mm08G019755
GO:0042775	mitochondrial ATP synthesis coupled electron transport	2	26	0.533204	0.969656	Mm08G019669;Mm19G040452
GO:0043562	cellular response to nitrogen levels	2	26	0.533204	0.969656	Mm02G003796;Mm11G026364
GO:0061564	axon development	2	26	0.533204	0.969656	Mm01G000612;Mm16G036093
GO:0071483	cellular response to blue light	2	26	0.533204	0.969656	Mm03G007350;Mm04G009242
GO:2000067	regulation of root morphogenesis	2	26	0.533204	0.969656	Mm11G027133;Mm14G033426
GO:1901361	organic cyclic compound catabolic process	25	370	0.533405	0.969656	Mm01G001817;Mm02G003796;Mm02G003859;Mm02G004928;Mm04G009452;Mm04G009542;Mm04G010064;Mm08G020743;Mm08G021642;Mm09G022819;Mm11G025968;Mm11G025987;Mm11G026586;Mm11G027349;Mm14G031781;Mm14G032085;Mm14G033093;Mm17G037115;Mm17G037536;Mm19G039901;Mm19G040510;Mm19G041329;MmUnG045466;MmUnG045871;MmUnG045872
GO:0072511	divalent inorganic cation transport	16	236	0.534333	0.969656	Mm02G004048;Mm02G004055;Mm02G006026;Mm03G007170;Mm04G009439;Mm05G012618;Mm06G015832;Mm06G015873;Mm07G017838;Mm07G018241;Mm12G029486;Mm15G034182;Mm16G036446;Mm19G040611;MmUnG041697;MmUnG041876
GO:0009753	response to jasmonic acid	27	400	0.534625	0.969656	Mm01G002102;Mm01G003438;Mm02G003938;Mm02G004568;Mm02G005361;Mm03G007413;Mm04G009284;Mm04G009673;Mm06G014068;Mm11G025375;Mm12G028264;Mm12G028492;Mm12G029243;Mm13G031504;Mm14G032580;Mm14G032821;Mm14G032968;Mm15G034997;Mm17G036706;Mm17G037483;Mm19G040227;Mm19G041282;MmUnG042483;MmUnG042583;MmUnG043085;MmUnG045977;MmUnG046263
GO:0006383	transcription from RNA polymerase III promoter	1	11	0.537439	0.969656	Mm07G019037
GO:0007173	epidermal growth factor receptor signaling pathway	1	11	0.537439	0.969656	Mm05G012648
GO:0007231	osmosensory signaling pathway	1	11	0.537439	0.969656	Mm16G035214
GO:0009915	phloem sucrose loading	1	11	0.537439	0.969656	Mm11G025776
GO:0010830	regulation of myotube differentiation	1	11	0.537439	0.969656	Mm02G003859
GO:0014902	myotube differentiation	1	11	0.537439	0.969656	Mm02G003859
GO:0034472	snRNA 3'-end processing	1	11	0.537439	0.969656	Mm06G015719
GO:0038127	ERBB signaling pathway	1	11	0.537439	0.969656	Mm05G012648
GO:0042058	regulation of epidermal growth factor receptor signaling pathway	1	11	0.537439	0.969656	Mm05G012648
GO:0042938	dipeptide transport	1	11	0.537439	0.969656	Mm06G016166
GO:0043112	receptor metabolic process	1	11	0.537439	0.969656	Mm12G027798
GO:0046365	monosaccharide catabolic process	1	11	0.537439	0.969656	Mm11G025987
GO:0046855	inositol phosphate dephosphorylation	1	11	0.537439	0.969656	Mm05G012861
GO:0048656	anther wall tapetum formation	1	11	0.537439	0.969656	Mm08G019441
GO:0048657	anther wall tapetum cell differentiation	1	11	0.537439	0.969656	Mm08G019441
GO:0051153	regulation of striated muscle cell differentiation	1	11	0.537439	0.969656	Mm02G003859
GO:0070525	tRNA threonylcarbamoyladenosine metabolic process	1	11	0.537439	0.969656	Mm01G000154
GO:0071156	regulation of cell cycle arrest	1	11	0.537439	0.969656	Mm04G009951
GO:0071158	positive regulation of cell cycle arrest	1	11	0.537439	0.969656	Mm04G009951
GO:0071277	cellular response to calcium ion	1	11	0.537439	0.969656	Mm16G036446
GO:0071545	inositol phosphate catabolic process	1	11	0.537439	0.969656	Mm05G012861
GO:0090355	positive regulation of auxin metabolic process	1	11	0.537439	0.969656	Mm08G020698
GO:1900034	regulation of cellular response to heat	1	11	0.537439	0.969656	Mm18G038405
GO:1900182	positive regulation of protein localization to nucleus	1	11	0.537439	0.969656	Mm01G001369
GO:1901184	regulation of ERBB signaling pathway	1	11	0.537439	0.969656	Mm05G012648
GO:0016050	vesicle organization	10	147	0.540172	0.973173	Mm04G009631;Mm08G019412;Mm08G019827;Mm08G020035;Mm09G022612;Mm12G027798;Mm13G029853;Mm18G039716;MmUnG042654;MmUnG045114
GO:0006816	calcium ion transport	11	162	0.540221	0.973173	Mm02G004048;Mm02G004055;Mm02G006026;Mm06G015832;Mm06G015873;Mm07G017838;Mm15G034182;Mm16G036446;Mm19G040611;MmUnG041697;MmUnG041876
GO:0043067	regulation of programmed cell death	11	162	0.540221	0.973173	Mm02G004262;Mm04G009951;Mm07G016721;Mm11G027133;Mm14G032085;Mm15G034182;Mm16G036446;Mm17G037061;Mm18G039154;MmUnG041876;MmUnG043129
GO:0042440	pigment metabolic process	13	192	0.540531	0.973233	Mm03G006613;Mm03G008617;Mm04G009242;Mm04G010691;Mm09G022819;Mm09G023354;Mm11G025968;Mm12G028742;Mm12G029054;Mm12G029060;Mm17G036706;Mm18G039484;Mm19G041329
GO:0006400	tRNA modification	7	102	0.540818	0.973251	Mm01G000154;Mm04G009981;Mm05G011418;Mm06G014806;Mm07G018633;Mm14G031702;Mm14G033329
GO:0048232	male gamete generation	6	87	0.541502	0.973983	Mm01G001432;Mm05G012777;Mm05G013489;Mm06G015932;MmUnG043085;MmUnG045253
GO:2000026	regulation of multicellular organismal development	64	952	0.542142	0.974634	Mm01G001890;Mm01G002930;Mm01G003113;Mm01G003438;Mm02G003859;Mm02G006288;Mm03G006945;Mm03G007145;Mm03G007377;Mm03G008617;Mm04G009242;Mm04G009308;Mm04G009673;Mm04G009764;Mm05G012770;Mm06G014089;Mm06G014582;Mm06G015343;Mm07G016671;Mm07G017048;Mm07G018237;Mm07G018726;Mm07G019394;Mm08G019755;Mm08G020035;Mm08G020086;Mm08G021082;Mm08G021088;Mm09G022819;Mm09G023354;Mm11G026542;Mm11G026595;Mm11G026864;Mm1…
GO:0010208	pollen wall assembly	4	57	0.5445	0.977872	Mm08G020743;Mm11G027133;Mm11G027349;Mm13G030878
GO:0085029	extracellular matrix assembly	4	57	0.5445	0.977872	Mm08G020743;Mm11G027133;Mm11G027349;Mm13G030878
GO:0090068	positive regulation of cell cycle process	3	42	0.547719	0.98315	Mm02G004262;Mm04G009951;Mm16G036446
GO:0001666	response to hypoxia	8	118	0.550263	0.987212	Mm04G009392;Mm04G009492;Mm06G015832;Mm07G017048;Mm11G025949;Mm12G028494;Mm13G030562;Mm17G037718
GO:0016192	vesicle-mediated transport	41	612	0.551083	0.988178	Mm02G004959;Mm02G004960;Mm02G005075;Mm02G005077;Mm02G005961;Mm02G006073;Mm03G007357;Mm04G009631;Mm04G009672;Mm04G010691;Mm05G012347;Mm06G013826;Mm06G015873;Mm06G016042;Mm06G016080;Mm07G016854;Mm07G018924;Mm08G019412;Mm08G019827;Mm08G020035;Mm08G020734;Mm09G022612;Mm10G023637;Mm10G024923;Mm11G026364;Mm12G027798;Mm13G029853;Mm13G030514;Mm13G030523;Mm14G032401;Mm16G035185;Mm17G036760;Mm18G039245;MmU…
GO:0042273	ribosomal large subunit biogenesis	6	88	0.552878	0.990155	Mm11G027001;Mm12G028150;Mm16G035507;Mm18G039408;Mm19G041397;Mm19G041401
GO:0000373	Group II intron splicing	2	27	0.553878	0.990155	Mm09G022080;Mm11G026491
GO:0010600	regulation of auxin biosynthetic process	2	27	0.553878	0.990155	Mm02G004240;Mm08G020698
GO:0043967	histone H4 acetylation	2	27	0.553878	0.990155	Mm01G001432;Mm09G022935
GO:0048534	hematopoietic or lymphoid organ development	2	27	0.553878	0.990155	Mm01G003113;MmUnG041859
GO:0048645	organ formation	2	27	0.553878	0.990155	Mm01G003113;MmUnG041859
GO:0051865	protein autoubiquitination	5	73	0.555109	0.991475	Mm01G001318;Mm05G012370;Mm06G015046;Mm13G031048;Mm13G031062
GO:0019439	aromatic compound catabolic process	23	344	0.555438	0.991475	Mm01G001817;Mm02G003859;Mm02G004928;Mm04G009452;Mm04G009542;Mm08G020743;Mm08G021642;Mm09G022819;Mm11G025968;Mm11G025987;Mm11G026586;Mm11G027349;Mm14G031781;Mm14G032085;Mm14G033093;Mm17G037115;Mm17G037536;Mm19G039901;Mm19G040510;Mm19G041329;MmUnG045466;MmUnG045871;MmUnG045872
GO:0019637	organophosphate metabolic process	41	613	0.555463	0.991475	Mm01G001463;Mm01G001472;Mm01G001879;Mm01G002717;Mm01G002957;Mm02G003744;Mm02G004281;Mm02G004473;Mm02G004928;Mm02G006073;Mm03G006888;Mm04G009452;Mm04G009546;Mm04G009716;Mm05G012861;Mm06G015411;Mm07G016579;Mm07G016630;Mm07G018924;Mm08G019669;Mm09G023196;Mm11G025987;Mm11G026237;Mm11G026364;Mm11G026999;Mm12G028604;Mm12G028741;Mm13G030794;Mm14G031738;Mm15G033964;Mm16G035587;Mm16G036399;Mm16G036539;Mm1…
GO:0001708	cell fate specification	4	58	0.558478	0.993494	Mm04G010691;Mm14G033426;Mm16G036446;Mm17G036706
GO:0019359	nicotinamide nucleotide biosynthetic process	4	58	0.558478	0.993494	Mm02G004928;Mm04G009452;Mm11G025987;Mm12G028741
GO:0034614	cellular response to reactive oxygen species	4	58	0.558478	0.993494	Mm06G015832;Mm07G019394;Mm08G020826;Mm18G039154
GO:0055088	lipid homeostasis	4	58	0.558478	0.993494	Mm05G012959;Mm07G016854;Mm08G019850;Mm13G030878
GO:1901401	regulation of tetrapyrrole metabolic process	4	58	0.558478	0.993494	Mm04G009242;Mm09G022819;Mm09G023354;Mm18G039484
GO:0009637	response to blue light	8	119	0.560015	0.993494	Mm01G001890;Mm03G007350;Mm04G009242;Mm11G027583;Mm11G027600;Mm16G035189;Mm17G037550;MmUnG041650
GO:0031329	regulation of cellular catabolic process	15	225	0.562469	0.993494	Mm02G003859;Mm02G004697;Mm05G012648;Mm05G013150;Mm06G016121;Mm06G016310;Mm08G019755;Mm09G022819;Mm11G026586;Mm12G028860;Mm13G031123;Mm14G032085;Mm17G037536;Mm19G040510;MmUnG045466
GO:0043648	dicarboxylic acid metabolic process	6	89	0.564123	0.993494	Mm07G018703;Mm08G019835;Mm16G036079;Mm18G039163;Mm19G041332;MmUnG044342
GO:0046496	nicotinamide nucleotide metabolic process	6	89	0.564123	0.993494	Mm02G004928;Mm04G009452;Mm11G025987;Mm12G028741;Mm16G036399;Mm18G039163
GO:0000281	mitotic cytokinesis	10	150	0.566367	0.993494	Mm03G006776;Mm04G009158;Mm04G009672;Mm07G017226;Mm11G027133;Mm12G028249;Mm13G030514;Mm13G030523;MmUnG041576;MmUnG043085
GO:0010374	stomatal complex development	5	74	0.567416	0.993494	Mm06G014139;Mm06G016155;Mm07G017201;Mm13G031104;MmUnG042686
GO:0019693	ribose phosphate metabolic process	17	256	0.568451	0.993494	Mm01G001463;Mm01G001472;Mm02G004473;Mm02G004928;Mm03G006888;Mm04G009452;Mm04G009546;Mm06G015411;Mm08G019669;Mm09G023196;Mm11G025987;Mm12G028604;Mm13G030794;Mm15G033964;Mm19G040452;MmUnG045529;MmUnG045936
GO:0000972	transcription-dependent tethering of RNA polymerase II gene DNA at nuclear periphery	1	12	0.568762	0.993494	Mm07G017368
GO:0001501	skeletal system development	1	12	0.568762	0.993494	Mm02G003859
GO:0002200	somatic diversification of immune receptors	1	12	0.568762	0.993494	Mm06G015844
GO:0002377	immunoglobulin production	1	12	0.568762	0.993494	Mm06G015844
GO:0002440	production of molecular mediator of immune response	1	12	0.568762	0.993494	Mm06G015844
GO:0006285	base-excision repair, AP site formation	1	12	0.568762	0.993494	Mm19G039901
GO:0006336	DNA replication-independent nucleosome assembly	1	12	0.568762	0.993494	Mm01G000612
GO:0007254	JNK cascade	1	12	0.568762	0.993494	Mm01G000612
GO:0007569	cell aging	1	12	0.568762	0.993494	Mm17G038062
GO:0009065	glutamine family amino acid catabolic process	1	12	0.568762	0.993494	Mm08G019835
GO:0009200	deoxyribonucleoside triphosphate metabolic process	1	12	0.568762	0.993494	Mm01G002717
GO:0009643	photosynthetic acclimation	1	12	0.568762	0.993494	Mm06G016225
GO:0009691	cytokinin biosynthetic process	1	12	0.568762	0.993494	Mm06G014806
GO:0009952	anterior/posterior pattern specification	1	12	0.568762	0.993494	Mm02G003859
GO:0010559	regulation of glycoprotein biosynthetic process	1	12	0.568762	0.993494	Mm04G009716
GO:0010976	positive regulation of neuron projection development	1	12	0.568762	0.993494	Mm11G026595
GO:0016445	somatic diversification of immunoglobulins	1	12	0.568762	0.993494	Mm06G015844
GO:0017157	regulation of exocytosis	1	12	0.568762	0.993494	MmUnG044925
GO:0030150	protein import into mitochondrial matrix	1	12	0.568762	0.993494	Mm13G031168
[truncated: 1,513 more rows]

## Sheet: go enrich -MF-upgene
Supplementary Table S4 The GO molecular_function enrichment of significantly up-regulated genes.
GO ID	Description	out (923)	All (13220)	pvalue	p.adjust	Genes
GO:0004519	endonuclease activity	97	526	2.7e-19	2.53e-16	Mm01G000231;Mm01G000274;Mm01G001153;Mm01G001484;Mm01G002377;Mm01G002675;Mm01G002848;Mm01G003446;Mm01G003477;Mm02G004396;Mm02G004475;Mm02G005528;Mm02G006278;Mm03G006447;Mm03G006605;Mm03G006624;Mm03G006675;Mm03G006691;Mm03G007712;Mm04G008930;Mm04G008964;Mm04G009337;Mm04G010302;Mm04G010542;Mm04G010560;Mm04G010779;Mm06G014016;Mm06G014316;Mm06G014334;Mm06G014818;Mm06G015809;Mm06G015844;Mm06G016132;Mm0…
GO:0004518	nuclease activity	102	865	7.4e-08	2.48e-05	Mm01G000231;Mm01G000274;Mm01G001153;Mm01G001484;Mm01G001817;Mm01G002377;Mm01G002675;Mm01G002848;Mm01G003446;Mm01G003477;Mm02G004396;Mm02G004475;Mm02G005528;Mm02G006278;Mm03G006447;Mm03G006605;Mm03G006624;Mm03G006675;Mm03G006691;Mm03G007712;Mm04G008930;Mm04G008964;Mm04G009337;Mm04G010302;Mm04G010542;Mm04G010560;Mm04G010779;Mm06G014016;Mm06G014316;Mm06G014334;Mm06G014818;Mm06G015809;Mm06G015844;Mm0…
GO:0044183	protein binding involved in protein folding	14	37	7.94e-08	2.48e-05	Mm01G001283;Mm02G004082;Mm02G004133;Mm06G014911;Mm06G015623;Mm10G023944;Mm12G028842;Mm12G028851;Mm13G029855;Mm14G031899;Mm16G036220;Mm16G036580;Mm19G040424;MmUnG044681
GO:0051082	unfolded protein binding	15	52	1.58e-06	0.000369559	Mm01G001283;Mm02G004082;Mm02G004133;Mm06G014911;Mm10G023944;Mm12G028842;Mm12G028851;Mm12G029054;Mm12G029060;Mm13G029855;Mm14G031899;Mm16G036220;Mm16G036580;Mm19G040424;MmUnG044681
GO:0016301	kinase activity	134	1336	7.15e-06	0.00119356	Mm01G000619;Mm01G000620;Mm01G000986;Mm01G001106;Mm01G001153;Mm01G001220;Mm01G001445;Mm01G001463;Mm01G001472;Mm01G001474;Mm01G001490;Mm01G001720;Mm01G001726;Mm01G001879;Mm01G001901;Mm01G001959;Mm01G001987;Mm01G002030;Mm01G002303;Mm01G002304;Mm01G002305;Mm01G002306;Mm01G002309;Mm01G002431;Mm01G002717;Mm01G003313;Mm02G004039;Mm02G004538;Mm02G004662;Mm02G004928;Mm02G005354;Mm02G005371;Mm02G005848;Mm0…
GO:0016788	hydrolase activity, acting on ester bonds	140	1411	7.65e-06	0.00119356	Mm01G000231;Mm01G000274;Mm01G000463;Mm01G001153;Mm01G001484;Mm01G001817;Mm01G002377;Mm01G002675;Mm01G002848;Mm01G003108;Mm01G003446;Mm01G003477;Mm02G003744;Mm02G004396;Mm02G004475;Mm02G005528;Mm02G005935;Mm02G006278;Mm02G006288;Mm03G006447;Mm03G006605;Mm03G006624;Mm03G006675;Mm03G006691;Mm03G007712;Mm04G008930;Mm04G008964;Mm04G009337;Mm04G009716;Mm04G009726;Mm04G009736;Mm04G010302;Mm04G010542;Mm0…
GO:0016773	phosphotransferase activity, alcohol group as acceptor	129	1287	1.13e-05	0.00150431	Mm01G000619;Mm01G000620;Mm01G000986;Mm01G001106;Mm01G001153;Mm01G001220;Mm01G001445;Mm01G001463;Mm01G001472;Mm01G001474;Mm01G001490;Mm01G001720;Mm01G001726;Mm01G001879;Mm01G001901;Mm01G001959;Mm01G001987;Mm01G002030;Mm01G002303;Mm01G002304;Mm01G002305;Mm01G002306;Mm01G002309;Mm01G002431;Mm01G003313;Mm02G004039;Mm02G004538;Mm02G004662;Mm02G004928;Mm02G005354;Mm02G005371;Mm02G005848;Mm02G005856;Mm0…
GO:0004672	protein kinase activity	114	1126	2.5e-05	0.00292936	Mm01G000619;Mm01G000620;Mm01G000986;Mm01G001106;Mm01G001153;Mm01G001220;Mm01G001445;Mm01G001463;Mm01G001472;Mm01G001474;Mm01G001490;Mm01G001720;Mm01G001726;Mm01G001901;Mm01G001959;Mm01G001987;Mm01G002030;Mm01G002303;Mm01G002304;Mm01G002305;Mm01G002306;Mm01G002309;Mm01G003313;Mm02G004039;Mm02G004538;Mm02G004662;Mm02G005354;Mm02G005371;Mm02G005848;Mm02G005856;Mm02G005975;Mm02G006288;Mm03G006841;Mm0…
GO:0016787	hydrolase activity	247	2856	6.68e-05	0.00694304	Mm01G000231;Mm01G000274;Mm01G000463;Mm01G000612;Mm01G000832;Mm01G000913;Mm01G001057;Mm01G001153;Mm01G001385;Mm01G001484;Mm01G001817;Mm01G001818;Mm01G002377;Mm01G002378;Mm01G002675;Mm01G002848;Mm01G002903;Mm01G003108;Mm01G003446;Mm01G003477;Mm02G003744;Mm02G003950;Mm02G004396;Mm02G004475;Mm02G005332;Mm02G005528;Mm02G005935;Mm02G006026;Mm02G006278;Mm02G006288;Mm03G006447;Mm03G006555;Mm03G006605;Mm0…
GO:0003723	RNA binding	144	1533	9.07e-05	0.00849352	Mm01G000154;Mm01G000231;Mm01G000274;Mm01G001153;Mm01G001382;Mm01G001484;Mm01G002243;Mm01G002377;Mm01G002675;Mm01G002848;Mm01G003446;Mm01G003477;Mm02G003859;Mm02G003938;Mm02G004396;Mm02G004475;Mm02G005022;Mm02G005268;Mm02G005528;Mm02G006265;Mm02G006278;Mm03G006447;Mm03G006555;Mm03G006605;Mm03G006624;Mm03G006675;Mm03G006691;Mm03G006735;Mm03G006776;Mm03G007350;Mm03G007393;Mm03G007712;Mm03G008528;Mm0…
GO:0035639	purine ribonucleoside triphosphate binding	35	262	0.000156543	0.0133204	Mm02G004082;Mm02G004133;Mm03G008591;Mm04G009114;Mm04G009816;Mm04G009866;Mm04G009888;Mm06G015712;Mm06G015887;Mm09G022128;Mm09G023622;Mm11G025439;Mm11G025513;Mm11G026206;Mm11G026337;Mm12G028783;Mm13G030621;Mm13G031139;Mm13G031495;Mm16G035732;Mm16G036544;Mm16G036580;Mm17G036760;Mm17G037492;Mm18G039412;Mm19G040452;Mm19G040535;Mm19G040682;Mm19G040911;Mm19G040912;MmUnG043360;MmUnG044049;MmUnG044925;MmU…
GO:0005524	ATP binding	28	196	0.00022755	0.0170872	Mm02G004082;Mm02G004133;Mm03G008591;Mm04G009114;Mm04G009816;Mm06G015712;Mm06G015887;Mm09G022128;Mm09G023622;Mm11G025439;Mm11G025513;Mm11G026206;Mm11G026337;Mm12G028783;Mm13G031139;Mm13G031495;Mm16G036544;Mm16G036580;Mm17G037492;Mm18G039412;Mm19G040452;Mm19G040535;Mm19G040682;Mm19G040911;Mm19G040912;MmUnG043360;MmUnG044049;MmUnG045710
GO:0001882	nucleoside binding	36	281	0.000292089	0.0170872	Mm02G004082;Mm02G004133;Mm03G008591;Mm04G009114;Mm04G009816;Mm04G009866;Mm04G009888;Mm06G015054;Mm06G015712;Mm06G015887;Mm09G022128;Mm09G023622;Mm11G025439;Mm11G025513;Mm11G026206;Mm11G026337;Mm12G028783;Mm13G030621;Mm13G031139;Mm13G031495;Mm16G035732;Mm16G036544;Mm16G036580;Mm17G036760;Mm17G037492;Mm18G039412;Mm19G040452;Mm19G040535;Mm19G040682;Mm19G040911;Mm19G040912;MmUnG043360;MmUnG044049;MmU…
GO:0001883	purine nucleoside binding	36	281	0.000292089	0.0170872	Mm02G004082;Mm02G004133;Mm03G008591;Mm04G009114;Mm04G009816;Mm04G009866;Mm04G009888;Mm06G015054;Mm06G015712;Mm06G015887;Mm09G022128;Mm09G023622;Mm11G025439;Mm11G025513;Mm11G026206;Mm11G026337;Mm12G028783;Mm13G030621;Mm13G031139;Mm13G031495;Mm16G035732;Mm16G036544;Mm16G036580;Mm17G036760;Mm17G037492;Mm18G039412;Mm19G040452;Mm19G040535;Mm19G040682;Mm19G040911;Mm19G040912;MmUnG043360;MmUnG044049;MmU…
GO:0032549	ribonucleoside binding	36	281	0.000292089	0.0170872	Mm02G004082;Mm02G004133;Mm03G008591;Mm04G009114;Mm04G009816;Mm04G009866;Mm04G009888;Mm06G015054;Mm06G015712;Mm06G015887;Mm09G022128;Mm09G023622;Mm11G025439;Mm11G025513;Mm11G026206;Mm11G026337;Mm12G028783;Mm13G030621;Mm13G031139;Mm13G031495;Mm16G035732;Mm16G036544;Mm16G036580;Mm17G036760;Mm17G037492;Mm18G039412;Mm19G040452;Mm19G040535;Mm19G040682;Mm19G040911;Mm19G040912;MmUnG043360;MmUnG044049;MmU…
GO:0032550	purine ribonucleoside binding	36	281	0.000292089	0.0170872	Mm02G004082;Mm02G004133;Mm03G008591;Mm04G009114;Mm04G009816;Mm04G009866;Mm04G009888;Mm06G015054;Mm06G015712;Mm06G015887;Mm09G022128;Mm09G023622;Mm11G025439;Mm11G025513;Mm11G026206;Mm11G026337;Mm12G028783;Mm13G030621;Mm13G031139;Mm13G031495;Mm16G035732;Mm16G036544;Mm16G036580;Mm17G036760;Mm17G037492;Mm18G039412;Mm19G040452;Mm19G040535;Mm19G040682;Mm19G040911;Mm19G040912;MmUnG043360;MmUnG044049;MmU…
GO:0097367	carbohydrate derivative binding	41	339	0.000392365	0.0216032	Mm01G003108;Mm02G004082;Mm02G004133;Mm02G005935;Mm03G007350;Mm03G008591;Mm04G009114;Mm04G009816;Mm04G009866;Mm04G009888;Mm06G015054;Mm06G015712;Mm06G015887;Mm09G022128;Mm09G023622;Mm11G025439;Mm11G025513;Mm11G026206;Mm11G026337;Mm12G028783;Mm13G030621;Mm13G031139;Mm13G031495;Mm16G035732;Mm16G036544;Mm16G036580;Mm17G036760;Mm17G037492;Mm18G039412;Mm19G040452;Mm19G040535;Mm19G040682;Mm19G040911;Mm1…
GO:0043492	ATPase activity, coupled to movement of substances	27	196	0.000525525	0.0246556	Mm02G006026;Mm06G014915;Mm06G015051;Mm06G015501;Mm06G015841;Mm07G017309;Mm08G019412;Mm08G019827;Mm08G021731;Mm08G021758;Mm09G022612;Mm13G029853;Mm13G030910;Mm13G031495;Mm14G031878;Mm15G034182;Mm18G038347;Mm18G039625;Mm19G040535;Mm19G040551;Mm19G040611;Mm19G041159;Mm19G041282;MmUnG041876;MmUnG042654;MmUnG045114;MmUnG045250
GO:0017076	purine nucleotide binding	36	290	0.00053461	0.0246556	Mm02G004082;Mm02G004133;Mm03G008591;Mm04G009114;Mm04G009816;Mm04G009866;Mm04G009888;Mm06G015054;Mm06G015712;Mm06G015887;Mm09G022128;Mm09G023622;Mm11G025439;Mm11G025513;Mm11G026206;Mm11G026337;Mm12G028783;Mm13G030621;Mm13G031139;Mm13G031495;Mm16G035732;Mm16G036544;Mm16G036580;Mm17G036760;Mm17G037492;Mm18G039412;Mm19G040452;Mm19G040535;Mm19G040682;Mm19G040911;Mm19G040912;MmUnG043360;MmUnG044049;MmU…
GO:0032555	purine ribonucleotide binding	36	290	0.00053461	0.0246556	Mm02G004082;Mm02G004133;Mm03G008591;Mm04G009114;Mm04G009816;Mm04G009866;Mm04G009888;Mm06G015054;Mm06G015712;Mm06G015887;Mm09G022128;Mm09G023622;Mm11G025439;Mm11G025513;Mm11G026206;Mm11G026337;Mm12G028783;Mm13G030621;Mm13G031139;Mm13G031495;Mm16G035732;Mm16G036544;Mm16G036580;Mm17G036760;Mm17G037492;Mm18G039412;Mm19G040452;Mm19G040535;Mm19G040682;Mm19G040911;Mm19G040912;MmUnG043360;MmUnG044049;MmU…
GO:0022804	active transmembrane transporter activity	43	367	0.000561829	0.0246556	Mm02G004974;Mm02G005067;Mm02G006026;Mm03G008128;Mm03G008130;Mm04G008795;Mm04G008907;Mm04G009094;Mm04G009349;Mm06G014915;Mm06G015051;Mm06G015501;Mm06G015832;Mm06G015841;Mm07G017309;Mm07G019138;Mm07G019324;Mm08G021731;Mm08G021758;Mm12G029137;Mm13G030910;Mm13G031168;Mm13G031495;Mm14G031878;Mm14G032114;Mm15G034182;Mm16G035128;Mm18G038347;Mm18G038806;Mm18G039092;Mm18G039625;Mm19G040535;Mm19G040551;Mm1…
GO:0032553	ribonucleotide binding	37	302	0.000579512	0.0246556	Mm02G004082;Mm02G004133;Mm03G007350;Mm03G008591;Mm04G009114;Mm04G009816;Mm04G009866;Mm04G009888;Mm06G015054;Mm06G015712;Mm06G015887;Mm09G022128;Mm09G023622;Mm11G025439;Mm11G025513;Mm11G026206;Mm11G026337;Mm12G028783;Mm13G030621;Mm13G031139;Mm13G031495;Mm16G035732;Mm16G036544;Mm16G036580;Mm17G036760;Mm17G037492;Mm18G039412;Mm19G040452;Mm19G040535;Mm19G040682;Mm19G040911;Mm19G040912;MmUnG043360;MmU…
GO:0004674	protein serine/threonine kinase activity	95	983	0.000630768	0.0256695	Mm01G000619;Mm01G000620;Mm01G000986;Mm01G001106;Mm01G001153;Mm01G001220;Mm01G001445;Mm01G001463;Mm01G001472;Mm01G001474;Mm01G001490;Mm01G001720;Mm01G001726;Mm01G001901;Mm01G001959;Mm01G001987;Mm01G002030;Mm01G002303;Mm01G002304;Mm01G002305;Mm01G002306;Mm01G002309;Mm01G003313;Mm02G004538;Mm02G004662;Mm02G005354;Mm02G005371;Mm02G005848;Mm02G005856;Mm02G006288;Mm03G006841;Mm03G007350;Mm04G008858;Mm0…
GO:0008865	fructokinase activity	5	12	0.000858768	0.0333124	Mm01G002431;Mm02G004928;Mm11G025987;Mm15G033600;Mm15G033611
GO:0030554	adenyl nucleotide binding	29	224	0.000925344	0.0333124	Mm02G004082;Mm02G004133;Mm03G008591;Mm04G009114;Mm04G009816;Mm06G015054;Mm06G015712;Mm06G015887;Mm09G022128;Mm09G023622;Mm11G025439;Mm11G025513;Mm11G026206;Mm11G026337;Mm12G028783;Mm13G031139;Mm13G031495;Mm16G036544;Mm16G036580;Mm17G037492;Mm18G039412;Mm19G040452;Mm19G040535;Mm19G040682;Mm19G040911;Mm19G040912;MmUnG043360;MmUnG044049;MmUnG045710
GO:0032559	adenyl ribonucleotide binding	29	224	0.000925344	0.0333124	Mm02G004082;Mm02G004133;Mm03G008591;Mm04G009114;Mm04G009816;Mm06G015054;Mm06G015712;Mm06G015887;Mm09G022128;Mm09G023622;Mm11G025439;Mm11G025513;Mm11G026206;Mm11G026337;Mm12G028783;Mm13G031139;Mm13G031495;Mm16G036544;Mm16G036580;Mm17G037492;Mm18G039412;Mm19G040452;Mm19G040535;Mm19G040682;Mm19G040911;Mm19G040912;MmUnG043360;MmUnG044049;MmUnG045710
GO:2001066	amylopectin binding	3	4	0.00128638	0.0439822	Mm01G003108;Mm02G005935;MmUnG041854
GO:0004396	hexokinase activity	5	13	0.00131571	0.0439822	Mm01G002431;Mm02G004928;Mm11G025987;Mm15G033600;Mm15G033611
GO:0003899	DNA-directed RNA polymerase activity	8	33	0.00158195	0.0510587	Mm06G015411;Mm07G018931;Mm07G019037;Mm11G025810;Mm13G030932;Mm19G040051;Mm19G040064;MmUnG045529
GO:0042623	ATPase activity, coupled	53	503	0.00167696	0.0523211	Mm01G001057;Mm01G001818;Mm01G002378;Mm02G003950;Mm02G006026;Mm03G008528;Mm05G013292;Mm06G014915;Mm06G015051;Mm06G015411;Mm06G015501;Mm06G015841;Mm07G017309;Mm07G018684;Mm07G019078;Mm08G019412;Mm08G019678;Mm08G019827;Mm08G021731;Mm08G021738;Mm08G021750;Mm08G021758;Mm09G022080;Mm09G022128;Mm09G022612;Mm11G026337;Mm11G026491;Mm11G026586;Mm12G027708;Mm13G029853;Mm13G030910;Mm13G031495;Mm14G031878;Mm1…
GO:0003825	alpha,alpha-trehalose-phosphate synthase (UDP-forming) activity	4	9	0.00223848	0.0665508	Mm04G009726;Mm04G009736;Mm07G016361;Mm07G016752
GO:0016887	ATPase activity	60	594	0.00233443	0.0665508	Mm01G000612;Mm01G001057;Mm01G001818;Mm01G002378;Mm02G003950;Mm02G006026;Mm03G008528;Mm05G013292;Mm06G014915;Mm06G015051;Mm06G015411;Mm06G015501;Mm06G015841;Mm06G015844;Mm07G017309;Mm07G018684;Mm07G019078;Mm08G019412;Mm08G019678;Mm08G019827;Mm08G020086;Mm08G020308;Mm08G021731;Mm08G021738;Mm08G021750;Mm08G021758;Mm09G022080;Mm09G022128;Mm09G022612;Mm11G026337;Mm11G026491;Mm11G026586;Mm12G027708;Mm1…
GO:0017111	nucleoside-triphosphatase activity	70	715	0.00234634	0.0665508	Mm01G000612;Mm01G001057;Mm01G001818;Mm01G002378;Mm02G003950;Mm02G006026;Mm03G006555;Mm03G008528;Mm04G009866;Mm04G009888;Mm05G013292;Mm06G014915;Mm06G015051;Mm06G015411;Mm06G015501;Mm06G015841;Mm06G015844;Mm07G017309;Mm07G018684;Mm07G019078;Mm08G019412;Mm08G019678;Mm08G019827;Mm08G020086;Mm08G020308;Mm08G020743;Mm08G021731;Mm08G021738;Mm08G021750;Mm08G021758;Mm09G022080;Mm09G022128;Mm09G022612;Mm1…
GO:0015301	anion:anion antiporter activity	5	15	0.00272989	0.0751523	Mm02G004974;Mm02G005067;Mm03G008128;Mm03G008130;Mm19G041280
GO:0008144	drug binding	34	296	0.00282577	0.0755691	Mm02G004082;Mm02G004133;Mm03G008591;Mm04G009114;Mm04G009816;Mm06G015054;Mm06G015712;Mm06G015887;Mm07G018226;Mm07G018491;Mm09G022128;Mm09G023622;Mm11G025439;Mm11G025513;Mm11G026206;Mm11G026337;Mm12G028783;Mm13G031139;Mm13G031495;Mm16G036544;Mm16G036580;Mm17G037492;Mm17G037718;Mm18G039412;Mm19G040452;Mm19G040535;Mm19G040682;Mm19G040911;Mm19G040912;MmUnG041596;MmUnG043360;MmUnG043500;MmUnG044049;MmU…
GO:0004619	phosphoglycerate mutase activity	3	5	0.00304868	0.0771233	MmUnG045653;MmUnG045654;MmUnG046160
GO:0046537	2,3-bisphosphoglycerate-independent phosphoglycerate mutase activity	3	5	0.00304868	0.0771233	MmUnG045653;MmUnG045654;MmUnG046160
GO:0034062	RNA polymerase activity	8	37	0.00343256	0.0845495	Mm06G015411;Mm07G018931;Mm07G019037;Mm11G025810;Mm13G030932;Mm19G040051;Mm19G040064;MmUnG045529
GO:0099516	ion antiporter activity	9	46	0.00400109	0.0960263	Mm02G004974;Mm02G005067;Mm03G008128;Mm03G008130;Mm04G008795;Mm04G009349;Mm06G015832;Mm19G041280;MmUnG044966
GO:0016772	transferase activity, transferring phosphorus-containing groups	150	1760	0.00445753	0.0999415	Mm01G000619;Mm01G000620;Mm01G000986;Mm01G001106;Mm01G001153;Mm01G001220;Mm01G001431;Mm01G001445;Mm01G001463;Mm01G001472;Mm01G001474;Mm01G001490;Mm01G001720;Mm01G001726;Mm01G001817;Mm01G001879;Mm01G001901;Mm01G001959;Mm01G001987;Mm01G002030;Mm01G002243;Mm01G002303;Mm01G002304;Mm01G002305;Mm01G002306;Mm01G002309;Mm01G002431;Mm01G002717;Mm01G002957;Mm01G003313;Mm02G004039;Mm02G004281;Mm02G004538;Mm0…
GO:0005509	calcium ion binding	19	142	0.00461691	0.0999415	Mm01G002635;Mm03G006505;Mm03G007660;Mm04G009622;Mm06G015832;Mm07G017201;Mm08G020159;Mm14G032498;Mm14G033277;Mm16G035472;Mm16G035533;Mm16G036446;Mm16G036458;Mm19G040084;Mm19G041397;Mm19G041401;MmUnG042329;MmUnG045127;MmUnG045597
GO:0015399	primary active transmembrane transporter activity	23	184	0.00464898	0.0999415	Mm02G006026;Mm06G014915;Mm06G015051;Mm06G015501;Mm06G015841;Mm07G017309;Mm08G021731;Mm08G021758;Mm13G030910;Mm13G031168;Mm13G031495;Mm14G031878;Mm15G034182;Mm18G038347;Mm18G039092;Mm18G039625;Mm19G040535;Mm19G040551;Mm19G040611;Mm19G041159;Mm19G041282;MmUnG041876;MmUnG045250
GO:0015405	P-P-bond-hydrolysis-driven transmembrane transporter activity	23	184	0.00464898	0.0999415	Mm02G006026;Mm06G014915;Mm06G015051;Mm06G015501;Mm06G015841;Mm07G017309;Mm08G021731;Mm08G021758;Mm13G030910;Mm13G031168;Mm13G031495;Mm14G031878;Mm15G034182;Mm18G038347;Mm18G039092;Mm18G039625;Mm19G040535;Mm19G040551;Mm19G040611;Mm19G041159;Mm19G041282;MmUnG041876;MmUnG045250
GO:0005507	copper ion binding	18	132	0.00469811	0.0999415	Mm01G002176;Mm02G004082;Mm02G004133;Mm04G009816;Mm07G019394;Mm09G023013;Mm11G026753;Mm12G028676;Mm16G036405;Mm16G036544;Mm16G036580;Mm17G037492;Mm18G038744;Mm19G040911;Mm19G040912;MmUnG041823;MmUnG042945;MmUnG044674
GO:0003980	UDP-glucose:glycoprotein glucosyltransferase activity	2	2	0.0048697	0.100368	Mm12G029054;Mm12G029060
GO:0030515	snoRNA binding	6	24	0.00515828	0.100368	Mm02G005022;Mm03G006735;Mm09G022324;MmUnG043328;MmUnG045042;MmUnG045396
GO:0004713	protein tyrosine kinase activity	4	11	0.00523691	0.100368	Mm02G005354;Mm02G005371;Mm05G013624;Mm19G041066
GO:0016868	intramolecular transferase activity, phosphotransferases	4	11	0.00523691	0.100368	Mm07G019154;MmUnG045653;MmUnG045654;MmUnG046160
GO:0016462	pyrophosphatase activity	72	764	0.0052543	0.100368	Mm01G000612;Mm01G001057;Mm01G001818;Mm01G002378;Mm02G003744;Mm02G003950;Mm02G006026;Mm03G006555;Mm03G008528;Mm04G009866;Mm04G009888;Mm05G013292;Mm06G013914;Mm06G014915;Mm06G015051;Mm06G015411;Mm06G015501;Mm06G015841;Mm06G015844;Mm07G017309;Mm07G018684;Mm07G019078;Mm08G019412;Mm08G019678;Mm08G019827;Mm08G020086;Mm08G020308;Mm08G020743;Mm08G021731;Mm08G021738;Mm08G021750;Mm08G021758;Mm09G022080;Mm0…
GO:0000156	phosphorelay response regulator activity	8	40	0.00568073	0.106343	Mm06G014089;Mm06G014476;Mm06G015343;Mm06G015497;Mm09G023354;Mm13G031020;Mm17G037509;MmUnG044386
GO:0016818	hydrolase activity, acting on acid anhydrides, in phosphorus-containing anhydrides	72	770	0.00631671	0.113812	Mm01G000612;Mm01G001057;Mm01G001818;Mm01G002378;Mm02G003744;Mm02G003950;Mm02G006026;Mm03G006555;Mm03G008528;Mm04G009866;Mm04G009888;Mm05G013292;Mm06G013914;Mm06G014915;Mm06G015051;Mm06G015411;Mm06G015501;Mm06G015841;Mm06G015844;Mm07G017309;Mm07G018684;Mm07G019078;Mm08G019412;Mm08G019678;Mm08G019827;Mm08G020086;Mm08G020308;Mm08G020743;Mm08G021731;Mm08G021738;Mm08G021750;Mm08G021758;Mm09G022080;Mm0…
GO:0016820	hydrolase activity, acting on acid anhydrides, catalyzing transmembrane movement of substances	21	168	0.00664949	0.113812	Mm02G006026;Mm06G014915;Mm06G015051;Mm06G015501;Mm06G015841;Mm07G017309;Mm08G021731;Mm08G021758;Mm13G030910;Mm13G031495;Mm14G031878;Mm15G034182;Mm18G038347;Mm18G039625;Mm19G040535;Mm19G040551;Mm19G040611;Mm19G041159;Mm19G041282;MmUnG041876;MmUnG045250
GO:0042626	ATPase activity, coupled to transmembrane movement of substances	21	168	0.00664949	0.113812	Mm02G006026;Mm06G014915;Mm06G015051;Mm06G015501;Mm06G015841;Mm07G017309;Mm08G021731;Mm08G021758;Mm13G030910;Mm13G031495;Mm14G031878;Mm15G034182;Mm18G038347;Mm18G039625;Mm19G040535;Mm19G040551;Mm19G040611;Mm19G041159;Mm19G041282;MmUnG041876;MmUnG045250
GO:0004004	ATP-dependent RNA helicase activity	15	106	0.00668764	0.113812	Mm01G001057;Mm01G001818;Mm03G008528;Mm07G018684;Mm07G019078;Mm08G019678;Mm09G022080;Mm11G026491;Mm11G026586;Mm12G027708;Mm14G032085;Mm14G032704;Mm16G036413;Mm17G036690;MmUnG041917
GO:0008186	RNA-dependent ATPase activity	15	106	0.00668764	0.113812	Mm01G001057;Mm01G001818;Mm03G008528;Mm07G018684;Mm07G019078;Mm08G019678;Mm09G022080;Mm11G026491;Mm11G026586;Mm12G027708;Mm14G032085;Mm14G032704;Mm16G036413;Mm17G036690;MmUnG041917
GO:0005516	calmodulin binding	29	258	0.00746978	0.123886	Mm01G001138;Mm02G004538;Mm02G005361;Mm02G006288;Mm05G011543;Mm05G013410;Mm06G014976;Mm07G016825;Mm07G016828;Mm07G018124;Mm07G018125;Mm07G018128;Mm07G018129;Mm07G018132;Mm07G018133;Mm07G019129;Mm08G020552;Mm08G021363;Mm09G022485;Mm11G027191;Mm12G028371;Mm12G028404;Mm14G032227;Mm14G033277;Mm14G033371;Mm18G038440;Mm19G041016;MmUnG041876;MmUnG044912
GO:0016758	transferase activity, transferring hexosyl groups	42	409	0.00754436	0.123886	Mm01G002028;Mm01G002619;Mm01G002625;Mm01G003560;Mm02G004489;Mm02G005713;Mm02G005905;Mm03G007441;Mm04G009158;Mm04G009726;Mm04G009736;Mm04G010918;Mm04G010922;Mm05G013153;Mm06G014096;Mm06G016173;Mm07G016361;Mm07G016752;Mm07G017321;Mm07G017324;Mm07G017330;Mm07G017331;Mm07G018226;Mm07G018700;Mm08G020226;Mm10G024791;Mm11G025997;Mm11G026870;Mm12G028249;Mm12G029054;Mm12G029060;Mm13G030917;Mm14G032330;Mm1…
GO:0016817	hydrolase activity, acting on acid anhydrides	72	777	0.0077838	0.125614	Mm01G000612;Mm01G001057;Mm01G001818;Mm01G002378;Mm02G003744;Mm02G003950;Mm02G006026;Mm03G006555;Mm03G008528;Mm04G009866;Mm04G009888;Mm05G013292;Mm06G013914;Mm06G014915;Mm06G015051;Mm06G015411;Mm06G015501;Mm06G015841;Mm06G015844;Mm07G017309;Mm07G018684;Mm07G019078;Mm08G019412;Mm08G019678;Mm08G019827;Mm08G020086;Mm08G020308;Mm08G020743;Mm08G021731;Mm08G021738;Mm08G021750;Mm08G021758;Mm09G022080;Mm0…
GO:0003724	RNA helicase activity	15	109	0.00862921	0.136897	Mm01G001057;Mm01G001818;Mm03G008528;Mm07G018684;Mm07G019078;Mm08G019678;Mm09G022080;Mm11G026491;Mm11G026586;Mm12G027708;Mm14G032085;Mm14G032704;Mm16G036413;Mm17G036690;MmUnG041917
GO:0008565	protein transporter activity	11	71	0.00977518	0.152493	Mm01G001369;Mm01G001899;Mm04G010171;Mm08G021065;Mm10G024805;Mm10G024923;Mm13G031168;Mm13G031495;Mm18G039092;Mm19G040535;MmUnG043444
GO:0008026	ATP-dependent helicase activity	17	132	0.0103538	0.15631	Mm01G001057;Mm01G001818;Mm03G008528;Mm06G015411;Mm07G018684;Mm07G019078;Mm08G019678;Mm09G022080;Mm11G026491;Mm11G026586;Mm12G027708;Mm14G032085;Mm14G032704;Mm16G036413;Mm17G036690;MmUnG041917;MmUnG045529
GO:0070035	purine NTP-dependent helicase activity	17	132	0.0103538	0.15631	Mm01G001057;Mm01G001818;Mm03G008528;Mm06G015411;Mm07G018684;Mm07G019078;Mm08G019678;Mm09G022080;Mm11G026491;Mm11G026586;Mm12G027708;Mm14G032085;Mm14G032704;Mm16G036413;Mm17G036690;MmUnG041917;MmUnG045529
GO:0015079	potassium ion transmembrane transporter activity	15	112	0.0109935	0.163332	Mm01G000443;Mm02G004048;Mm02G004055;Mm04G008790;Mm04G008795;Mm04G009349;Mm04G009657;Mm07G017838;Mm12G029210;Mm14G032807;Mm14G033555;Mm17G037647;MmUnG043376;MmUnG043382;MmUnG044966
GO:0004012	phospholipid-translocating ATPase activity	6	28	0.0113761	0.166376	Mm08G019412;Mm08G019827;Mm09G022612;Mm13G029853;MmUnG042654;MmUnG045114
GO:0008514	organic anion transmembrane transporter activity	27	244	0.0116947	0.168404	Mm01G001589;Mm02G004974;Mm02G005067;Mm02G005759;Mm03G007066;Mm03G008128;Mm03G008130;Mm05G012466;Mm05G012498;Mm05G013588;Mm05G013602;Mm07G017309;Mm07G019138;Mm08G020616;Mm08G020619;Mm11G026482;Mm12G029507;Mm13G030878;Mm14G032114;Mm15G034473;Mm16G035128;Mm17G036778;Mm18G038811;Mm19G040966;Mm19G041280;MmUnG043068;MmUnG043177
GO:0005215	transporter activity	111	1296	0.0123503	0.17515	Mm01G000443;Mm01G001369;Mm01G001589;Mm01G001899;Mm01G003425;Mm02G004048;Mm02G004055;Mm02G004974;Mm02G005067;Mm02G005700;Mm02G005759;Mm02G006026;Mm02G006308;Mm03G007066;Mm03G007170;Mm03G008128;Mm03G008130;Mm03G008461;Mm04G008790;Mm04G008795;Mm04G008907;Mm04G009094;Mm04G009349;Mm04G009439;Mm04G009657;Mm04G010171;Mm05G012466;Mm05G012498;Mm05G012618;Mm05G012781;Mm05G013505;Mm05G013588;Mm05G013602;Mm0…
GO:0035250	UDP-galactosyltransferase activity	4	14	0.0134264	0.176202	Mm01G003560;Mm04G010918;Mm04G010922;Mm08G020226
GO:0015081	sodium ion transmembrane transporter activity	6	29	0.0135174	0.176202	Mm02G004048;Mm02G004055;Mm04G009349;Mm06G015832;Mm07G017838;MmUnG044966
GO:0005522	profilin binding	2	3	0.0139305	0.176202	Mm01G002008;Mm19G041005
GO:0015440	peptide-transporting ATPase activity	2	3	0.0139305	0.176202	Mm13G031495;Mm19G040535
GO:0015462	protein-transmembrane transporting ATPase activity	2	3	0.0139305	0.176202	Mm13G031495;Mm19G040535
GO:0033220	amide-transporting ATPase activity	2	3	0.0139305	0.176202	Mm13G031495;Mm19G040535
GO:0047216	inositol 3-alpha-galactosyltransferase activity	2	3	0.0139305	0.176202	Mm01G003560;Mm08G020226
GO:0052631	sphingolipid delta-8 desaturase activity	2	3	0.0139305	0.176202	Mm07G019105;Mm18G039352
GO:0004602	glutathione peroxidase activity	3	8	0.0145623	0.179346	Mm01G002176;MmUnG042945;MmUnG044674
GO:0005471	ATP:ADP antiporter activity	3	8	0.0145623	0.179346	Mm02G004974;Mm02G005067;Mm19G041280
GO:0016866	intramolecular transferase activity	9	56	0.0147731	0.17958	Mm01G000154;Mm01G002629;Mm04G009981;Mm07G019154;Mm14G032473;MmUnG042541;MmUnG045653;MmUnG045654;MmUnG046160
GO:0003756	protein disulfide isomerase activity	6	30	0.015925	0.188681	Mm01G001946;Mm01G003162;Mm03G006451;Mm12G028757;Mm12G028797;Mm12G028803
GO:0016864	intramolecular oxidoreductase activity, transposing S-S bonds	6	30	0.015925	0.188681	Mm01G001946;Mm01G003162;Mm03G006451;Mm12G028757;Mm12G028797;Mm12G028803
GO:0004386	helicase activity	17	139	0.0167552	0.196036	Mm01G001057;Mm01G001818;Mm03G008528;Mm06G015411;Mm07G018684;Mm07G019078;Mm08G019678;Mm09G022080;Mm11G026491;Mm11G026586;Mm12G027708;Mm14G032085;Mm14G032704;Mm16G036413;Mm17G036690;MmUnG041917;MmUnG045529
GO:0005347	ATP transmembrane transporter activity	4	15	0.017316	0.197656	Mm01G001589;Mm02G004974;Mm02G005067;Mm19G041280
GO:0016762	xyloglucan:xyloglucosyl transferase activity	4	15	0.017316	0.197656	Mm07G017321;Mm07G017324;Mm07G017330;Mm07G017331
GO:0015197	peptide transporter activity	7	40	0.0194255	0.216455	Mm03G008461;Mm05G012781;Mm06G016166;Mm13G031168;Mm13G031495;Mm18G039092;Mm19G040535
GO:1904680	peptide transmembrane transporter activity	7	40	0.0194255	0.216455	Mm03G008461;Mm05G012781;Mm06G016166;Mm13G031168;Mm13G031495;Mm18G039092;Mm19G040535
GO:0015291	secondary active transmembrane transporter activity	20	175	0.0200214	0.22047	Mm02G004974;Mm02G005067;Mm03G008128;Mm03G008130;Mm04G008795;Mm04G008907;Mm04G009094;Mm04G009349;Mm06G015832;Mm07G019138;Mm07G019324;Mm12G029137;Mm14G032114;Mm16G035128;Mm18G038806;Mm19G041280;MmUnG041697;MmUnG044154;MmUnG044966;MmUnG045880
GO:0016884	carbon-nitrogen ligase activity, with glutamine as amido-N-donor	3	9	0.0207242	0.221808	Mm02G005760;Mm03G008591;MmUnG043371
GO:0031683	G-protein beta/gamma-subunit complex binding	3	9	0.0207242	0.221808	Mm04G009866;Mm04G009888;Mm16G035732
GO:1901505	carbohydrate derivative transporter activity	11	79	0.0208538	0.221808	Mm01G001589;Mm02G004974;Mm02G005067;Mm03G008128;Mm03G008130;Mm05G013588;Mm05G013602;Mm10G024448;Mm13G030975;Mm18G038811;Mm19G041280
GO:0015450	P-P-bond-hydrolysis-driven protein transmembrane transporter activity	4	16	0.0218397	0.229685	Mm13G031168;Mm13G031495;Mm18G039092;Mm19G040535
GO:0003824	catalytic activity	572	7775	0.0231225	0.240473	Mm01G000154;Mm01G000231;Mm01G000274;Mm01G000322;Mm01G000463;Mm01G000612;Mm01G000619;Mm01G000620;Mm01G000832;Mm01G000913;Mm01G000986;Mm01G001057;Mm01G001106;Mm01G001153;Mm01G001220;Mm01G001318;Mm01G001385;Mm01G001431;Mm01G001445;Mm01G001463;Mm01G001472;Mm01G001474;Mm01G001484;Mm01G001490;Mm01G001720;Mm01G001726;Mm01G001817;Mm01G001818;Mm01G001879;Mm01G001901;Mm01G001946;Mm01G001959;Mm01G001987;Mm0…
GO:0015297	antiporter activity	11	81	0.0246825	0.252905	Mm02G004974;Mm02G005067;Mm03G008128;Mm03G008130;Mm04G008795;Mm04G009349;Mm06G015832;Mm14G032114;Mm16G035128;Mm19G041280;MmUnG044966
GO:0005548	phospholipid transporter activity	6	33	0.0248843	0.252905	Mm08G019412;Mm08G019827;Mm09G022612;Mm13G029853;MmUnG042654;MmUnG045114
GO:0022857	transmembrane transporter activity	97	1147	0.0254674	0.252905	Mm01G000443;Mm01G001589;Mm01G003425;Mm02G004048;Mm02G004055;Mm02G004974;Mm02G005067;Mm02G005700;Mm02G005759;Mm02G006026;Mm02G006308;Mm03G007066;Mm03G007170;Mm03G008128;Mm03G008130;Mm03G008461;Mm04G008790;Mm04G008795;Mm04G008907;Mm04G009094;Mm04G009349;Mm04G009439;Mm04G009657;Mm05G012466;Mm05G012498;Mm05G012618;Mm05G012781;Mm05G013505;Mm05G013588;Mm05G013602;Mm06G014915;Mm06G015051;Mm06G015501;Mm0…
GO:0005536	glucose binding	2	4	0.0265746	0.252905	Mm01G003560;Mm08G020226
GO:0015117	thiosulfate transmembrane transporter activity	2	4	0.0265746	0.252905	Mm14G032114;Mm16G035128
GO:0015141	succinate transmembrane transporter activity	2	4	0.0265746	0.252905	Mm14G032114;Mm16G035128
GO:0051722	protein C-terminal methylesterase activity	2	4	0.0265746	0.252905	Mm11G025588;Mm11G025673
GO:0016860	intramolecular oxidoreductase activity	8	52	0.0266607	0.252905	Mm01G001946;Mm01G003162;Mm03G006451;Mm03G006613;Mm12G028060;Mm12G028757;Mm12G028797;Mm12G028803
GO:0008469	histone-arginine N-methyltransferase activity	4	17	0.0270197	0.252905	Mm04G009308;Mm04G011190;Mm09G023226;Mm11G025911
GO:0015217	ADP transmembrane transporter activity	4	17	0.0270197	0.252905	Mm01G001589;Mm02G004974;Mm02G005067;Mm19G041280
GO:0005272	sodium channel activity	3	10	0.028095	0.260365	Mm02G004048;Mm02G004055;Mm07G017838
GO:0019901	protein kinase binding	13	105	0.0308258	0.282149	Mm01G001879;Mm01G001901;Mm02G004533;Mm04G008863;Mm04G008864;Mm05G013564;Mm06G015621;Mm06G015778;Mm06G015873;Mm07G016721;Mm09G022819;Mm16G035214;MmUnG045237
GO:0005342	organic acid transmembrane transporter activity	21	195	0.0313499	0.282149	Mm02G005759;Mm03G007066;Mm03G008128;Mm03G008130;Mm05G012466;Mm05G012498;Mm07G017309;Mm07G019138;Mm08G020616;Mm08G020619;Mm11G026482;Mm12G029507;Mm13G030878;Mm14G032114;Mm15G034473;Mm16G035128;Mm17G036778;Mm18G038811;Mm19G040966;MmUnG043068;MmUnG043177
GO:0046943	carboxylic acid transmembrane transporter activity	21	195	0.0313499	0.282149	Mm02G005759;Mm03G007066;Mm03G008128;Mm03G008130;Mm05G012466;Mm05G012498;Mm07G017309;Mm07G019138;Mm08G020616;Mm08G020619;Mm11G026482;Mm12G029507;Mm13G030878;Mm14G032114;Mm15G034473;Mm16G035128;Mm17G036778;Mm18G038811;Mm19G040966;MmUnG043068;MmUnG043177
[truncated: 832 more rows]

## Sheet: go enrich -CC-upgene
Supplementary Table S4. The GO cellular_component enrichment of significantly up-regulated genes.
GO ID	Description	out (1029)	All (15162)	pvalue	p.adjust	Genes
[truncated: 518 more rows]
