# Supplementary material for: Metabolomics and Transcriptomics Reveal the Response Mechanisms of Mikania micrantha to Puccinia spegazzinii Infection
Source: Microorganisms. 2023 Mar 7;11(3):678. doi: 10.3390/microorganisms11030678 (PMC10057677; doi:10.3390/microorganisms11030678)
Supplement: Supplementary file 1 [file microorganisms-11-00678-s001.zip › Supplementary Table 5.xlsx]

## Sheet: Plant-pathogen interaction
Supplementary Table S5. DEGs annotated in the plant-pathogen interaction pathway.
gene_id	kegg_gene	E-value	Annotation	A1	A2	A3	CK1	CK2	CK3	A1_normalized	A2_normalized	A3_normalized	ck1_normalized	ck2_normalized	ck3_normalized	baseMean	log2FoldChange	pvalue	padj	sig
Mm01G002635	pxb:103964989	3.8e-36	K02183, calmodulin;	4958	603	4553	120	847	151	4326.12	495.3	2924.22	181.616	939.343	182.297	1508.15	2.57071	0.00431416	0.0250183	rich (p.adj < 0.05, log2FC >= 1)
Mm10G024005	gra:105780608	2.3e-20	K02183, calmodulin;	673	445	742	86	187	109	587.229	365.52	476.559	130.158	207.387	131.592	316.408	1.6047	2.11879e-05	0.000328482	rich (p.adj < 0.05, log2FC >= 1)
Mm14G032498	pxb:103964989	7.2e-33	K02183, calmodulin;	3450	802	2872	171	590	453	3010.31	658.757	1844.58	258.803	654.324	546.891	1162.28	1.91639	0.00253528	0.0165131	rich (p.adj < 0.05, log2FC >= 1)
Mm01G000443	sind:105168542	5.4e-273	K05391, cyclic nucleotide gated channel, other eukaryote;	1571	1812	1024	176	180	389	1370.78	1488.36	657.678	266.371	199.624	469.626	742.074	1.91001	0.000157247	0.00176054	rich (p.adj < 0.05, log2FC >= 1)
Mm04G008790	sind:105173088	1.1e-259	K05391, cyclic nucleotide gated channel, other eukaryote;	45	52	29	4	11	6	39.2649	42.7125	18.6256	6.05388	12.1993	7.24359	21.0166	1.9613	0.00925888	0.0454797	rich (p.adj < 0.05, log2FC >= 1)
Mm04G009657	zma:100273558	2e-237	K05391, cyclic nucleotide gated channel, other eukaryote;	1231	1901	1458	371	667	326	1074.11	1561.47	936.42	561.497	739.719	393.568	877.798	1.07526	0.0058374	0.0319281	rich (p.adj < 0.05, log2FC >= 1)
Mm12G029210	sind:105160375	3.3e-203	K05391, cyclic nucleotide gated channel, other eukaryote;	598	950	880	34	77	99	521.787	780.324	565.192	51.458	85.3948	119.519	353.946	2.85978	2.68376e-11	1.86183e-09	rich (p.adj < 0.05, log2FC >= 1)
Mm08G020086	pmum:103321235	0	K09487, heat shock protein 90kDa beta;	17044	24038	5878	745	346	820	14871.8	19744.7	3775.22	1127.54	383.722	989.957	6815.48	3.94036	7.67715e-09	3.16202e-07	rich (p.adj < 0.05, log2FC >= 1)
Mm12G028783	vvi:100258010	0	K09487, heat shock protein 90kDa beta;	750	574	822	65	74	105	654.416	471.48	527.94	98.3756	82.0677	126.763	326.84	2.42879	3.32988e-13	3.27405e-11	rich (p.adj < 0.05, log2FC >= 1)
MmUnG044049	vvi:100258010	0	K09487, heat shock protein 90kDa beta;	5373	3944	4219	709	1117	1533	4688.23	3239.58	2709.71	1073.05	1238.78	1850.74	2466.68	1.35334	0.000352144	0.00337361	rich (p.adj < 0.05, log2FC >= 1)
Mm02G006288	rcu:8268713	1.1e-247	K13412, calcium-dependent protein kinase [EC:2.7.11.1];	6301	4139	7189	630	1777	564	5497.96	3399.75	4617.23	953.486	1970.73	680.897	2853.34	1.90614	9.98511e-05	0.00121805	rich (p.adj < 0.05, log2FC >= 1)
Mm07G019246	vra:106772233	3.1e-85	K13412, calcium-dependent protein kinase [EC:2.7.11.1];	245	175	279	39	79	85	213.776	143.744	179.191	59.0253	87.6129	102.617	130.994	1.10177	0.0053897	0.0300175	rich (p.adj < 0.05, log2FC >= 1)
Mm12G028018	tcc:TCM_040717	9.9e-200	K13412, calcium-dependent protein kinase [EC:2.7.11.1];	370	435	1446	6	7	10	322.845	357.306	928.713	9.08082	7.76317	12.0726	272.963	5.7991	6.6587e-20	1.979e-17	rich (p.adj < 0.05, log2FC >= 1)
Mm14G032227	cmo:103485126	2.1e-250	K13412, calcium-dependent protein kinase [EC:2.7.11.1];	858	1288	1292	138	135	87	748.652	1057.95	829.804	208.859	149.718	105.032	516.67	2.51078	3.38876e-11	2.31409e-09	rich (p.adj < 0.05, log2FC >= 1)
Mm14G033277	sot:102596332	1.9e-249	K13412, calcium-dependent protein kinase [EC:2.7.11.1];	1088	1401	1237	221	337	474	949.339	1150.77	794.48	334.477	373.741	572.243	695.842	1.17585	0.00083176	0.00675166	rich (p.adj < 0.05, log2FC >= 1)
MmUnG044912	sind:105161690	1.7e-202	K13412, calcium-dependent protein kinase [EC:2.7.11.1];	1053	434	625	30	63	31	918.8	356.485	401.415	45.4041	69.8685	37.4252	304.899	3.45353	1.51967e-10	9.17908e-09	rich (p.adj < 0.05, log2FC >= 1)
Mm02G004662	sind:105157897	7.9e-134	K13413, mitogen-activated protein kinase kinase 4/5, plant [EC:2.7.12.2];	479	289	482	31	43	44	417.953	237.383	309.571	46.9176	47.688	53.1196	185.439	2.70624	1.93221e-12	1.65688e-10	rich (p.adj < 0.05, log2FC >= 1)
Mm04G010097	sot:102589350	2.8e-74	K13416, brassinosteroid insensitive 1-associated receptor kinase 1 [EC:2.7.10.1 2.7.11.1];	1917	1994	1295	245	561	566	1672.69	1637.86	831.731	370.8	622.162	683.312	969.758	1.30425	0.00281425	0.0179785	rich (p.adj < 0.05, log2FC >= 1)
Mm11G025655	mdm:103416333	4.3e-67	K13416, brassinosteroid insensitive 1-associated receptor kinase 1 [EC:2.7.10.1 2.7.11.1];	151	167	105	20	30	31	131.756	137.173	67.4376	30.2694	33.2707	37.4252	72.8886	1.73182	0.000424785	0.00393966	rich (p.adj < 0.05, log2FC >= 1)
Mm02G005243	aip:107638822	3.5e-80	K13420, LRR receptor-like serine/threonine-protein kinase FLS2 [EC:2.7.11.1];	149	172	30	8	0	10	130.011	141.28	19.2679	12.1078	0	12.0726	52.4564	3.59998	0.00246422	0.0161479	rich (p.adj < 0.05, log2FC >= 1)
Mm06G016121	gra:105789043	2.7e-127	K13424, WRKY transcription factor 33;	93	163	71	12	8	16	81.1475	133.887	45.6007	18.1616	8.87219	19.3162	51.1642	2.49812	0.000195785	0.00208492	rich (p.adj < 0.05, log2FC >= 1)
Mm12G029243	sly:101255501	5.4e-25	K13424, WRKY transcription factor 33;	592	1205	1734	37	67	90	516.552	989.779	1113.68	55.9984	74.3046	108.654	476.495	3.45194	9.91395e-14	1.10807e-11	rich (p.adj < 0.05, log2FC >= 1)
Mm13G031123	tcc:TCM_042240	6.4e-170	K13424, WRKY transcription factor 33;	2584	1734	2748	704	780	542	2254.68	1424.3	1764.94	1065.48	865.038	654.337	1338.13	1.07498	0.00163886	0.0116191	rich (p.adj < 0.05, log2FC >= 1)
Mm13G031543	sly:101268787	3.6e-95	K13424, WRKY transcription factor 33;	810	156	65	3	23	22	706.769	128.137	41.7471	4.54041	25.5075	26.5598	155.544	3.94453	0.000204467	0.00216415	rich (p.adj < 0.05, log2FC >= 1)
Mm16G036048	gmx:100127421	1.5e-26	K13424, WRKY transcription factor 33;	425	221	331	28	40	67	370.836	181.528	212.589	42.3772	44.3609	80.8867	155.43	2.18722	1.32321e-05	0.000218067	rich (p.adj < 0.05, log2FC >= 1)
Mm04G009134	bna:106391602	8.8e-15	K13425, WRKY transcription factor 22;	8539	3238	6508	317	643	591	7450.74	2659.67	4179.85	479.77	713.102	713.493	2699.44	2.90569	6.29353e-10	3.36608e-08	rich (p.adj < 0.05, log2FC >= 1)
Mm04G009135	aip:107643094	2.8e-15	K13425, WRKY transcription factor 22;	1803	643	1185	48	109	116	1573.22	528.156	761.082	72.6466	120.884	140.043	532.671	3.09869	7.55611e-09	3.122e-07	rich (p.adj < 0.05, log2FC >= 1)
Mm05G012690	nnu:104613060	3.8e-51	K13425, WRKY transcription factor 22;	651	116	180	28	64	47	568.033	95.2816	115.607	42.3772	70.9775	56.7414	158.17	2.19249	0.0047734	0.0272227	rich (p.adj < 0.05, log2FC >= 1)
Mm07G019118	sly:101261749	8.7e-93	K13425, WRKY transcription factor 22;	296	221	231	69	91	67	258.276	181.528	148.363	104.429	100.921	80.8867	145.734	1.0386	0.00691428	0.036349	rich (p.adj < 0.05, log2FC >= 1)
Mm08G021363	egr:104443404	3e-19	K13425, WRKY transcription factor 22;	1089	735	879	159	287	262	950.212	603.724	564.549	240.642	318.29	316.303	498.953	1.27374	0.000288198	0.00285946	rich (p.adj < 0.05, log2FC >= 1)
Mm12G028226	pxb:103956318	5e-16	K13425, WRKY transcription factor 22;	5129	2653	3060	432	331	489	4475.33	2179.16	1965.33	653.819	367.087	590.352	1705.18	2.41994	1.92349e-07	5.59269e-06	rich (p.adj < 0.05, log2FC >= 1)
MmUnG044104	egu:105047514	2e-16	K13425, WRKY transcription factor 22;	3538	1448	1020	188	338	386	3087.1	1189.38	655.109	284.532	374.85	466.004	1009.49	2.13112	0.000522976	0.00467142	rich (p.adj < 0.05, log2FC >= 1)
Mm14G033127	mdm:103448436	3.3e-139	K13428, LRR receptor-like serine/threonine-protein kinase EFR [EC:2.7.11.1];	188	269	109	14	49	30	164.04	220.955	70.0067	21.1886	54.3422	36.2179	94.4584	2.01703	0.00146018	0.0106318	rich (p.adj < 0.05, log2FC >= 1)
Mm06G015621	cit:102617134	3.3e-206	K13429, chitin elicitor receptor kinase 1;	52	50	25	0	0	0	45.3728	41.0697	16.0566	0	0	0	17.0832	7.19542	3.46933e-06	6.8636e-05	rich (p.adj < 0.05, log2FC >= 1)
Mm13G031153	pper:PRUPE_ppa025495mg	6.5e-54	K13434, pathogenesis-related genes transcriptional activator PTI6;	2000	642	1602	50	126	82	1745.11	527.334	1028.91	75.6735	139.737	98.9957	602.626	3.38977	3.39585e-10	1.9477e-08	rich (p.adj < 0.05, log2FC >= 1)
Mm03G007463	sind:105156806	7.3e-183	K13436, pto-interacting protein 1 [EC:2.7.11.1];	3088	3686	4688	745	1009	1142	2694.45	3027.66	3010.93	1127.54	1119	1378.7	2059.71	1.26831	1.27225e-08	4.95154e-07	rich (p.adj < 0.05, log2FC >= 1)
Mm13G030014	sly:543603	0	K13447, respiratory burst oxidase [EC:1.6.3.- 1.11.1.-];	1384	551	964	237	264	114	1207.62	452.588	619.142	358.692	292.782	137.628	511.408	1.53097	0.00585896	0.0320174	rich (p.adj < 0.05, log2FC >= 1)
Mm04G009622	mtr:MTR_6g023460	2.9e-45	K13448, calcium-binding protein CML;	2702	282	2370	60	165	145	2357.64	231.633	1522.16	90.8082	182.989	175.053	760.048	3.19428	3.72571e-05	0.00053393	rich (p.adj < 0.05, log2FC >= 1)
Mm08G020159	sly:101265138	2.3e-39	K13448, calcium-binding protein CML;	2907	1196	1436	168	222	109	2536.52	982.386	922.29	254.263	246.203	131.592	845.542	2.81315	2.51574e-07	6.99221e-06	rich (p.adj < 0.05, log2FC >= 1)
Mm19G040084	pop:POPTR_0007s12250g	8.5e-50	K13448, calcium-binding protein CML;	596	1530	897	116	129	94	520.042	1256.73	576.11	175.563	143.064	113.483	464.166	2.44618	3.06583e-07	8.32644e-06	rich (p.adj < 0.05, log2FC >= 1)
MmUnG042154	cit:102628484	1.3e-13	K13448, calcium-binding protein CML;	66	101	8	4	0	5	57.5886	82.9607	5.13811	6.05388	0	6.03632	26.2963	3.61057	0.00726282	0.0377863	rich (p.adj < 0.05, log2FC >= 1)
MmUnG045597	spen:107032124	1.9e-54	K13448, calcium-binding protein CML;	543	719	966	217	147	201	473.797	590.582	620.426	328.423	163.026	242.66	403.152	1.20134	0.0014104	0.0103559	rich (p.adj < 0.05, log2FC >= 1)
Mm12G028777	vvi:100854803	9.7e-210	K13457, disease resistance protein RPM1;	226	246	171	14	20	49	197.197	202.063	109.827	21.1886	22.1805	59.1559	101.935	2.30704	0.000109979	0.00131646	rich (p.adj < 0.05, log2FC >= 1)
Mm18G038711	sind:105161218	4.6e-115	K13457, disease resistance protein RPM1;	252	371	152	30	43	22	219.884	304.737	97.624	45.4041	47.688	26.5598	123.649	2.37868	4.01482e-05	0.000569125	rich (p.adj < 0.05, log2FC >= 1)
Mm01G000542	pper:PRUPE_ppa015499mg	3.6e-86	K13459, disease resistance protein RPS2;	484	587	739	127	114	226	422.316	482.158	474.633	192.211	126.429	272.842	328.431	1.22205	0.00161219	0.0114892	rich (p.adj < 0.05, log2FC >= 1)
Mm04G010231	gra:105786923	1.5e-162	K13459, disease resistance protein RPS2;	580	838	188	120	40	56	506.081	688.328	120.746	181.616	44.3609	67.6068	268.123	2.16651	0.00566907	0.0312276	rich (p.adj < 0.05, log2FC >= 1)
Mm04G010253	gra:105786923	2.5e-164	K13459, disease resistance protein RPS2;	370	304	231	77	45	67	322.845	249.704	148.363	116.537	49.9061	80.8867	161.374	1.54736	0.00260739	0.0168676	rich (p.adj < 0.05, log2FC >= 1)
Mm05G012353	sot:102595864	6.4e-86	K13459, disease resistance protein RPS2;	148	90	128	5	10	27	129.138	73.9254	82.2097	7.56735	11.0902	32.5961	56.0878	2.46656	0.000438781	0.00403938	rich (p.adj < 0.05, log2FC >= 1)
Mm11G026315	egr:104454824	7.8e-70	K13459, disease resistance protein RPS2;	1046	858	1059	217	243	242	912.692	704.755	680.157	328.423	269.493	292.158	531.28	1.369	4.77041e-07	1.23652e-05	rich (p.adj < 0.05, log2FC >= 1)
Mm19G040582	vvi:104881494	4.3e-166	K13459, disease resistance protein RPS2;	271	198	194	38	5	20	236.462	162.636	124.599	57.5119	5.54512	24.1453	101.817	2.59903	0.00114136	0.00872839	rich (p.adj < 0.05, log2FC >= 1)
Mm08G019882	sly:543900	7.4e-58	K13466, EIX receptor 1/2;	125	104	84	11	5	8	109.069	85.4249	53.9501	16.6482	5.54512	9.65811	46.716	2.98918	5.13924e-06	9.656e-05	rich (p.adj < 0.05, log2FC >= 1)
Mm08G019896	sly:543900	1.4e-116	K13466, EIX receptor 1/2;	467	139	28	9	0	0	407.483	114.174	17.9834	13.6212	0	0	92.2102	5.34715	0.000764743	0.00630154	rich (p.adj < 0.05, log2FC >= 1)
Mm08G019913	sly:543900	7.3e-76	K13466, EIX receptor 1/2;	324	243	303	22	15	19	282.708	199.599	194.606	33.2963	16.6354	22.938	124.964	3.23155	7.87282e-13	7.1995e-11	rich (p.adj < 0.05, log2FC >= 1)
Mm14G033426	sly:543900	2.4e-86	K13466, EIX receptor 1/2;	369	383	130	48	16	18	321.973	314.594	83.4942	72.6466	17.7444	21.7308	138.697	2.69215	0.000537257	0.00475836	rich (p.adj < 0.05, log2FC >= 1)
Mm01G003438	crb:CARUB_v10025742mg	5.4e-18	K16225, probable WRKY transcription factor 52;	38	62	71	2	0	0	33.1571	50.9264	45.6007	3.02694	0	0	22.1185	5.62822	1.02445e-05	0.000175465	rich (p.adj < 0.05, log2FC >= 1)
Mm13G031504	crb:CARUB_v10025742mg	2.4e-12	K16225, probable WRKY transcription factor 52;	64	84	37	3	5	9	55.8435	68.997	23.7637	4.54041	5.54512	10.8654	28.2592	2.8134	0.000368723	0.00350803	rich (p.adj < 0.05, log2FC >= 1)
Mm14G032821	ath:AT5G45260	5.9e-16	K16225, probable WRKY transcription factor 52;	1282	578	1322	205	189	199	1118.61	474.765	849.072	310.261	209.605	240.246	533.761	1.68519	9.11469e-05	0.00113032	rich (p.adj < 0.05, log2FC >= 1)
Mm14G032968	ath:AT5G45260	5.9e-16	K16225, probable WRKY transcription factor 52;	1565	682	1353	233	222	182	1365.55	560.19	868.982	352.639	246.203	219.722	602.214	1.77258	8.38011e-05	0.00105575	rich (p.adj < 0.05, log2FC >= 1)
MmUnG042583	crb:CARUB_v10025742mg	2.5e-12	K16225, probable WRKY transcription factor 52;	73	99	54	10	11	12	63.6965	81.3179	34.6822	15.1347	12.1993	14.4872	36.9196	2.10477	0.000588023	0.00513838	rich (p.adj < 0.05, log2FC >= 1)
Mm08G021655	mdm:103404995	1.2e-19	K18834, WRKY transcription factor 1;	1694	996	310	84	123	134	1478.11	818.108	199.102	127.131	136.41	161.773	486.772	2.55205	0.000210558	0.00221607	rich (p.adj < 0.05, log2FC >= 1)
MmUnG042978	mdm:103404995	1.2e-19	K18834, WRKY transcription factor 1;	3061	1675	2604	233	795	806	2670.89	1375.83	1672.45	352.639	881.674	973.055	1321.09	1.37279	0.0067582	0.0357874	rich (p.adj < 0.05, log2FC >= 1)
Mm02G004703	egr:104426306	4.3e-22	K18875, enhanced disease susceptibility 1 protein;	859	1306	1234	245	301	311	749.524	1072.74	792.553	370.8	333.816	375.459	615.815	1.27587	4.47354e-06	8.5648e-05	rich (p.adj < 0.05, log2FC >= 1)
Mm13G030562	sind:105157152	1.8e-174	K18875, enhanced disease susceptibility 1 protein;	1434	1886	1253	375	228	153	1251.24	1549.15	804.756	567.551	252.857	184.711	768.378	1.8442	0.000584695	0.00511271	rich (p.adj < 0.05, log2FC >= 1)

## Sheet: amino acid synthesis
Supplementary Table S5. DEGs annotated in amino acid synthesis pathway.
gene_id	kegg_gene	E-value	Annotation	A1	A2	A3	CK1	CK2	CK3	A1_normalized	A2_normalized	A3_normalized	ck1_normalized	ck2_normalized	ck3_normalized	baseMean	log2FoldChange	pvalue	padj	sig	gene_id
Mm01G000322	aip:107617566	4.8e-51	K01693, imidazoleglycerol-phosphate dehydratase [EC:4.2.1.19];	1032	1158	1595	214	450	331	900.476	951.173	1024.41	323.883	499.061	399.604	683.101	1.23264	1.31572e-05	0.000216969	rich (p.adj < 0.05, log2FC >= 1)
Mm01G002457	sot:102590492	4.6e-247	K14682, amino-acid N-acetyltransferase [EC:2.3.1.1];	82	160	373	36	41	28	71.5494	131.423	239.564	54.4849	45.47	33.8034	96.0491	1.73071	0.00343678	0.0209419	rich (p.adj < 0.05, log2FC >= 1)
Mm01G002572	bna:106442927	3.4e-103	K00826, branched-chain amino acid aminotransferase [EC:2.6.1.42];	561	399	733	154	204	110	489.503	327.736	470.779	233.074	226.241	132.799	313.355	1.12223	0.00337024	0.0206478	rich (p.adj < 0.05, log2FC >= 1)
Mm01G002584	vvi:100261704	2.1e-231	K01695, tryptophan synthase alpha chain [EC:4.2.1.20];	1191	1101	1075	213	406	249	1039.21	904.354	690.433	322.369	450.264	300.609	617.873	1.29401	8.88369e-05	0.00110535	rich (p.adj < 0.05, log2FC >= 1)
Mm02G006100	sind:105171182	3.3e-110	K01834, 2,3-bisphosphoglycerate-dependent phosphoglycerate mutase [EC:5.4.2.11];	121	142	156	39	26	30	105.579	116.638	100.193	59.0253	28.8346	36.2179	74.4146	1.38911	0.00198302	0.0135718	rich (p.adj < 0.05, log2FC >= 1)
Mm02G006308	nnu:104595031	1.1e-22	K01807, ribose 5-phosphate isomerase A [EC:5.3.1.6];	1611	2042	2592	363	657	607	1405.68	1677.29	1664.75	549.39	728.629	732.809	1126.42	1.2386	1.49612e-06	3.31888e-05	rich (p.adj < 0.05, log2FC >= 1)
Mm04G009049	sind:105164286	4.3e-168	K00616, transaldolase [EC:2.2.1.2];	929	1162	1812	202	250	174	810.603	954.459	1163.78	305.721	277.256	210.064	620.314	1.88627	1.11563e-09	5.53666e-08	rich (p.adj < 0.05, log2FC >= 1)
Mm04G009452	spen:107007106	5.1e-240	K00850, 6-phosphofructokinase 1 [EC:2.7.1.11];	915	900	1222	332	214	237	798.387	739.254	784.846	502.472	237.331	286.122	558.069	1.181	0.00219579	0.0147669	rich (p.adj < 0.05, log2FC >= 1)
Mm04G009816	egr:104435440	0	K01681, aconitate hydratase [EC:4.2.1.3];	3444	3771	4593	681	814	881	3005.08	3097.47	2949.92	1030.67	902.745	1063.6	2008.25	1.59508	1.16789e-15	1.84006e-13	rich (p.adj < 0.05, log2FC >= 1)
Mm05G013257	pop:POPTR_0001s12930g	1.9e-165	K00616, transaldolase [EC:2.2.1.2];	611	1002	984	289	217	159	533.131	823.036	631.987	437.393	240.658	191.955	476.36	1.19439	0.00633298	0.0340109	rich (p.adj < 0.05, log2FC >= 1)
Mm05G013505	pda:103722777	8e-49	K01623, fructose-bisphosphate aldolase, class I [EC:4.1.2.13];	639	707	574	105	179	277	557.562	580.725	368.659	158.914	198.515	334.412	366.465	1.12146	0.00866068	0.0433681	rich (p.adj < 0.05, log2FC >= 1)
Mm06G013873	sita:101760718	2.2e-11	K01803, triosephosphate isomerase (TIM) [EC:5.3.1.1];	17	19	4	0	0	0	14.8334	15.6065	2.56905	0	0	0	5.50149	5.55963	0.00715187	0.0373204	rich (p.adj < 0.05, log2FC >= 1)
Mm06G014755	sind:105166490	1.1e-170	K01649, 2-isopropylmalate synthase [EC:2.3.3.13];	553	463	420	62	100	77	482.522	380.305	269.751	93.8351	110.902	92.9593	238.379	1.92544	1.41605e-07	4.3367e-06	rich (p.adj < 0.05, log2FC >= 1)
Mm07G017644	ota:Ot08g02650	4.1e-21	K00620, glutamate N-acetyltransferase / amino-acid N-acetyltransferase [EC:2.3.1.35 2.3.1.1];	210	238	321	41	51	16	183.236	195.492	206.167	62.0523	56.5602	19.3162	120.471	2.08852	6.97021e-05	0.000903364	rich (p.adj < 0.05, log2FC >= 1)
Mm07G018229	vvi:100265663	2.7e-208	K01689, enolase [EC:4.2.1.11];	389	500	820	184	123	104	339.424	410.697	526.656	278.478	136.41	125.555	302.87	1.24406	0.00619295	0.033355	rich (p.adj < 0.05, log2FC >= 1)
Mm08G019498	jcu:105644775	3e-178	K00134, glyceraldehyde 3-phosphate dehydrogenase [EC:1.2.1.12];	10268	13558	15891	1661	2190	5003	8959.39	11136.5	10206.2	2513.87	2428.76	6039.94	6880.77	1.46415	0.00135728	0.0100505	rich (p.adj < 0.05, log2FC >= 1)
Mm08G020616	pda:103722777	1.6e-55	K01623, fructose-bisphosphate aldolase, class I [EC:4.1.2.13];	56	45	56	11	3	10	48.863	36.9627	35.9667	16.6482	3.32707	12.0726	25.6401	1.94878	0.00965583	0.0469927	rich (p.adj < 0.05, log2FC >= 1)
Mm08G020619	pda:103722777	3e-54	K01623, fructose-bisphosphate aldolase, class I [EC:4.1.2.13];	67	75	79	2	0	0	58.4611	61.6045	50.7388	3.02694	0	0	28.9719	6.03882	6.27227e-07	1.56981e-05	rich (p.adj < 0.05, log2FC >= 1)
Mm09G022165	spen:107008091	4.2e-237	K01626, 3-deoxy-7-phosphoheptulonate synthase [EC:2.5.1.54];	1334	1688	956	98	164	359	1163.99	1386.51	614.004	148.32	181.88	433.408	654.685	2.05009	0.000255431	0.00260044	rich (p.adj < 0.05, log2FC >= 1)
Mm09G022192	aip:107623256	2e-51	K01623, fructose-bisphosphate aldolase, class I [EC:4.1.2.13];	19	13	14	0	0	0	16.5785	10.6781	8.99169	0	0	0	6.04139	5.69611	0.00180701	0.0125726	rich (p.adj < 0.05, log2FC >= 1)
Mm09G023547	sly:101253806	5.4e-221	K01652, acetolactate synthase I/II/III large subunit [EC:2.2.1.6];	335	431	170	4	35	46	292.306	354.021	109.185	6.05388	38.8158	55.5342	142.652	2.90351	0.000341269	0.00328871	rich (p.adj < 0.05, log2FC >= 1)
Mm11G025307	sly:101253806	6.2e-218	K01652, acetolactate synthase I/II/III large subunit [EC:2.2.1.6];	3865	3031	2129	714	327	340	3372.42	2489.64	1367.38	1080.62	362.651	410.47	1513.86	1.96423	0.000687222	0.00578833	rich (p.adj < 0.05, log2FC >= 1)
Mm11G025326	sly:101253806	6.2e-218	K01652, acetolactate synthase I/II/III large subunit [EC:2.2.1.6];	3939	3024	2531	733	413	341	3436.99	2483.89	1625.57	1109.37	458.027	411.677	1587.59	1.93175	0.000274143	0.002745	rich (p.adj < 0.05, log2FC >= 1)
Mm11G026753	sind:105169577	5.9e-106	K00145, N-acetyl-gamma-glutamyl-phosphate reductase [EC:1.2.1.38];	34	38	42	2	0	0	29.6668	31.2129	26.9751	3.02694	0	0	15.147	5.05299	0.000156919	0.00175762	rich (p.adj < 0.05, log2FC >= 1)
Mm11G026991	nnu:104595031	1.2e-16	K01807, ribose 5-phosphate isomerase A [EC:5.3.1.6];	4609	4689	1431	310	283	577	4021.6	3851.51	919.079	469.176	313.854	696.591	1711.97	2.57099	4.10773e-05	0.000580722	rich (p.adj < 0.05, log2FC >= 1)
Mm14G032141	cit:102609279	8.1e-226	K00031, isocitrate dehydrogenase [EC:1.1.1.42];	2349	3282	2912	539	183	318	2049.63	2695.81	1870.27	815.76	202.951	383.91	1336.39	2.23906	5.16011e-05	0.000702538	rich (p.adj < 0.05, log2FC >= 1)
Mm14G033462	sind:105167125	0	K12657, delta-1-pyrroline-5-carboxylate synthetase [EC:2.7.2.11 1.2.1.41];	411	338	384	99	89	49	358.62	277.631	246.629	149.834	98.7031	59.1559	198.429	1.52457	0.000924438	0.00735333	rich (p.adj < 0.05, log2FC >= 1)
Mm15G034473	pda:103722777	5.3e-53	K01623, fructose-bisphosphate aldolase, class I [EC:4.1.2.13];	104	305	73	26	10	24	90.7456	250.525	46.8852	39.3502	11.0902	28.9743	77.9284	2.2959	0.00472951	0.0270255	rich (p.adj < 0.05, log2FC >= 1)
Mm16G035357	rcu:8262817	2.4e-149	K01940, argininosuccinate synthase [EC:6.3.4.5];	747	785	953	194	172	177	651.798	644.794	612.077	293.613	190.752	213.686	434.453	1.45424	6.1866e-07	1.55134e-05	rich (p.adj < 0.05, log2FC >= 1)
Mm16G036079	pop:POPTR_0006s27650g	2.1e-225	K00811, aspartate aminotransferase, chloroplastic [EC:2.6.1.1];	789	1000	876	217	196	219	688.445	821.393	562.623	328.423	217.369	264.391	480.441	1.35669	2.48782e-05	0.000375455	rich (p.adj < 0.05, log2FC >= 1)
MmUnG043371	jcu:105648724	8.7e-308	K01953, asparagine synthase (glutamine-hydrolysing) [EC:6.3.5.4];	1224	1004	1425	286	347	357	1068.01	824.679	915.225	432.852	384.831	430.993	676.098	1.16948	1.43718e-06	3.20444e-05	rich (p.adj < 0.05, log2FC >= 1)
MmUnG043699	cam:101499849	3.3e-196	K01915, glutamine synthetase [EC:6.3.1.2];	5702	7601	12293	1344	2104	1837	4975.3	6243.41	7895.34	2034.1	2333.39	2217.74	4283.22	1.53729	5.10441e-08	1.73603e-06	rich (p.adj < 0.05, log2FC >= 1)
MmUnG045653	mus:103981096	2.3e-89	K15633, 2,3-bisphosphoglycerate-independent phosphoglycerate mutase [EC:5.4.2.12];	783	1099	1011	46	186	106	683.21	902.711	649.328	69.6196	206.278	127.97	439.853	2.46417	2.29369e-07	6.44874e-06	rich (p.adj < 0.05, log2FC >= 1)
MmUnG045654	cmo:103501500	8.1e-290	K15633, 2,3-bisphosphoglycerate-independent phosphoglycerate mutase [EC:5.4.2.12];	4258	3802	4346	517	818	1480	3715.34	3122.94	2791.28	782.464	907.181	1786.75	2184.32	1.46959	0.000472463	0.00429078	rich (p.adj < 0.05, log2FC >= 1)
MmUnG046160	sind:105178665	9.1e-278	K15633, 2,3-bisphosphoglycerate-independent phosphoglycerate mutase [EC:5.4.2.12];	178	200	219	61	22	42	155.315	164.279	140.656	92.3217	24.3985	50.7051	104.612	1.46788	0.00956695	0.0466224	rich (p.adj < 0.05, log2FC >= 1)

## Sheet: TCA cycle
Supplementary Table S5. DEGs annotated in TCA cycle pathway.
gene_id	kegg_gene	E-value	Annotation	A1	A2	A3	CK1	CK2	CK3	A1_normalized	A2_normalized	A3_normalized	ck1_normalized	ck2_normalized	ck3_normalized	baseMean	log2FoldChange	pvalue	padj	sig
Mm03G006888	rcu:8258819	0	K01648, ATP citrate (pro-S)-lyase [EC:2.3.3.8];	976	1231	1030	350	158	231	851.613	1011.14	661.531	529.715	175.226	278.878	584.683	1.36121	0.00591675	0.0322389	rich (p.adj < 0.05, log2FC >= 1)
Mm04G009816	egr:104435440	0	K01681, aconitate hydratase [EC:4.2.1.3];	3444	3771	4593	681	814	881	3005.08	3097.47	2949.92	1030.67	902.745	1063.6	2008.25	1.59508	1.16789e-15	1.84006e-13	rich (p.adj < 0.05, log2FC >= 1)
Mm07G018703	gra:105794532	3.3e-251	K01679, fumarate hydratase, class II [EC:4.2.1.2];	1120	1019	868	246	295	214	977.261	837	557.485	372.314	327.162	258.355	554.929	1.30845	0.000218363	0.00228261	rich (p.adj < 0.05, log2FC >= 1)
Mm12G029280	sind:105172198	0	K00164, 2-oxoglutarate dehydrogenase E1 component [EC:1.2.4.2];	859	696	589	122	275	226	749.524	571.69	378.293	184.643	304.981	272.842	410.329	1.15423	0.004712	0.0269608	rich (p.adj < 0.05, log2FC >= 1)
Mm14G032141	cit:102609279	8.1e-226	K00031, isocitrate dehydrogenase [EC:1.1.1.42];	2349	3282	2912	539	183	318	2049.63	2695.81	1870.27	815.76	202.951	383.91	1336.39	2.23906	5.16011e-05	0.000702538	rich (p.adj < 0.05, log2FC >= 1)
Mm18G039163	gra:105800362	8.7e-138	K00025, malate dehydrogenase [EC:1.1.1.37];	256	422	901	69	91	31	223.374	346.628	578.679	104.429	100.921	37.4252	231.909	2.24439	0.000116554	0.00137997	rich (p.adj < 0.05, log2FC >= 1)
Mm19G040452	sind:105177982	0	K00234, succinate dehydrogenase (ubiquinone) flavoprotein subunit [EC:1.3.5.1];	802	1042	1450	312	310	234	699.788	855.892	931.282	472.203	343.797	282.5	597.577	1.18066	0.000310374	0.00303537	rich (p.adj < 0.05, log2FC >= 1)
MmUnG045097	sind:105167725	1.4e-118	K00164, 2-oxoglutarate dehydrogenase E1 component [EC:1.2.4.2];	155	118	160	37	23	15	135.246	96.9244	102.762	55.9984	25.5075	18.109	72.4246	1.76238	0.00202045	0.0137611	rich (p.adj < 0.05, log2FC >= 1)
Mm18G039167	bna:106363601	3.8e-11	K01647, citrate synthase [EC:2.3.3.1];	2	7	5	184	25	0	1.74511	5.74975	3.21132	278.478	27.7256	0	52.8184	-4.83586	0.0028011	0.0179076	down (p.adj < 0.05, log2FC <= -1)
Mm01G002115	bna:106363601	2.2e-09	K01647, citrate synthase [EC:2.3.3.1];	87	76	305	424	1522	806	75.9122	62.4259	195.89	641.711	1687.93	973.055	606.155	-3.30258	4.78301e-08	1.64382e-06	down (p.adj < 0.05, log2FC <= -1)
Mm06G015899	bna:106363601	6.6e-39	K01647, citrate synthase [EC:2.3.3.1];	169	254	475	444	514	385	147.462	208.634	305.075	671.981	570.038	464.797	394.664	-1.36616	0.000570116	0.00500027	down (p.adj < 0.05, log2FC <= -1)
